# Supplementary material
Source: publisher figshare collection journal article supplement (https://rs.figshare.com/ndownloader/files/12440288)
Supplement: Supplementary file 1 [file 12440288]

## Sheet: Contents
SSCG tab displays Supplemented Sepkoski Compendium of Genera ranged-through data
	Compendium column indicates taxonomy/stratigraphy source
	We added Taxon* & Taxon** columns for additional taxonomic clarity
	FAD/LAD = First/Last Appearance Datum
	We compiled Megaguilds, Life Modes, Life Mode Justifications, Confidences, and Life Mode References
		We evaluated the life mode of each aquatic metazoan taxon; the benthics, which were not discussed, are not shown (except for Agnostida)
	We added Klug et al. (2010) diversity & megaguilds: N/A indicates the taxon was not discussed by Klug et al. (2010)
	We added a key showing approximate correlation of Sepkoski (2002) stages with their ICS equivalents for reference
	Diversity count by life mode and taxa shown binned to series/stage
PBDB tab displays Paleobiology database collections data
	We added G*, P*, C*, O*, F* columns
		An asterisk* in one of these columns indicates that we added the taxonomic designation of the relevant preceding column (i.e., Genus, Phylum, Class, Order, Family)
		Taxa listed in these columns in the same cell as an asterisk* were removed from the relevant preceding column (i.e., Genus, Phylum, Class, Order, Family)
	We added Early/Late Period*, ICS Early/Late Epoch*, and ICS Early/Late Age* columns
		Correlations of regional stages to their ICS equivalents detailed in methods and in electronic supplementary materials
	We compiled Megaguilds, Life Modes, Life Mode Justifications, Confidences, and Life Mode References
		We evaluated the life mode of each aquatic metazoan taxon; the benthics, which were not discussed, are not shown (except for Agnostida)
	We added Klug et al. (2010) megaguilds: N/A indicates the taxon was not discussed by Klug et al. (2010)
	SQS (Shareholder Quorum Subsampling) standardized SIB (sampled-in-bin) diversity, occurrences, and raw SIB diversity by life mode
Westermann Morphospace tab displays position of each measured Ammonoid, Nautilid, and Tarphycerid species in Westermann Morphospace
	We measured each species (specimens used for measurements are referenced)
	We calculated U, Th, and w
	We inferred shell morphology and life mode based on the U, Th, and w values (code included in cells)

## Sheet: SSCG
Genus	Compendium	Phylum	Class	Taxon*	Order	Taxon**	FAD	FAD	LAD	LAD	Megaguild	Life Mode	Life Mode Justification	Confidence	Life Mode References	Klug et al. (2010) Diversity	Klug et al. (2010) Megaguilds		Stratigraphic Key/Reference (Sepkoski, 2002)			Approximate ICS Equivalent				SSCG (Supplemented Sepkoski Compendium of Genera) Ranged-Through Generic Diversity
Raphidiophorus	Sepkoski, 2002	Annelida	Polychaeta		AMPHINOMORPHA		C	Mosc-u	C	Step	Demersal	Nektobenthos	Generalized Polychaete (Anguilliform Swimmers, Crawlers, and Burrowers)	0.75	Briggs & Kear, 1993	Absent	N/A		Lower Cambrian	Tommotian	Tomm-l	Age 2	Terreneuvian				Cambrian								Ordovician					Silurian				Devonian
Astreptoscolex	Sepkoski, 2002	Annelida	Polychaeta		PHYLLODOCEMORPHA		C	Serp-l	C	Mosc-u	Demersal	Nektobenthos	Generalized Polychaete (Anguilliform Swimmers, Crawlers, and Burrowers)	0.75	Brusca et al., 2016	Absent	N/A				Tomm-u						Tomm	Atda	Boto	Tojonian	Stage 5	Dres	Paibian	Tremp	Trema	Arenig	Darr	Cara	Ashg	Llan	Wenlock	Ludlow	Pridoli	Loch	Pragian	Emsian	Eifelian	Givetian	Frasnian
Canadia	Sepkoski, 2002	Annelida	Polychaeta		PHYLLODOCEMORPHA		Cm	mMid-l	Cm	uMid-u	Demersal	Nektobenthos	Generalized Polychaete (Anguilliform Swimmers, Crawlers, and Burrowers)	0.75	Brusca et al., 2016	Absent	N/A				Tomm					Euplankton	0	2	2	2	3	1	1	2	14	71	103	64	57	70	59	80	47	38	35	40	44	31	36
Carbosesostris	Sepkoski, 2002	Annelida	Polychaeta		PHYLLODOCEMORPHA		C	Serp-l	C	Serp-l	Demersal	Nektobenthos	Generalized Polychaete (Anguilliform Swimmers, Crawlers, and Burrowers)	0.75	Brusca et al., 2016	Absent	N/A			Atdabanian	Atda-l	Age 3	Epoch 2			Nektoplankton	1	4	4	4	11	5	8	5	9	27	25	15	14	6	4	6	4	5	7	18	13	16	15
Didontogaster	Sepkoski, 2002	Annelida	Polychaeta		PHYLLODOCEMORPHA		C	Mosc-u	C	Mosc-u	Demersal	Nektobenthos	Generalized Polychaete (Anguilliform Swimmers, Crawlers, and Burrowers)	0.75	Brusca et al., 2016	Absent	N/A				Atda-u					Eudemersus	3	8	10	9	17	0	0	37	45	135	124	90	81	32	79	61	33	42	68	96	89	84	117
Dinoscolites	Sepkoski, 2002	Annelida	Polychaeta		PHYLLODOCEMORPHA		O	Cara-m	O	Cara-m	Demersal	Nektobenthos	Generalized Polychaete (Anguilliform Swimmers, Crawlers, and Burrowers)	0.75	Brusca et al., 2016	Absent	N/A				Atda					Nektobenthos	0	39	17	19	58	12	4	7	23	35	40	56	50	62	78	67	84	133	133	135	97	86	81
Dryptoscolex	Sepkoski, 2002	Annelida	Polychaeta		PHYLLODOCEMORPHA		C	Mosc-u	C	Mosc-u	Demersal	Nektobenthos	Generalized Polychaete (Anguilliform Swimmers, Crawlers, and Burrowers)	0.75	Brusca et al., 2016	Absent	N/A			Botomian	Boto-l					Planktonekton	5	11	13	9	23	12	13	23	60	63	73	71	49	26	30	26	37	41	28	26	23	30	35
Eotomopteris	Sepkoski, 2002	Annelida	Polychaeta		PHYLLODOCEMORPHA		C	Vise-u	C	Vise-u	Demersal	Nektobenthos	Generalized Polychaete (Anguilliform Swimmers, Crawlers, and Burrowers)	0.75	Brusca et al., 2016	Absent	N/A				Boto-u	Age 4				Eunekton	0	0	0	0	2	0	0	0	0	10	5	12	11	5	25	27	30	72	40	50	54	78	103
Esconites	Sepkoski, 2002	Annelida	Polychaeta		PHYLLODOCEMORPHA		C	Serp-l	C	Mosc-u	Demersal	Nektobenthos	Generalized Polychaete (Anguilliform Swimmers, Crawlers, and Burrowers)	0.75	Brusca et al., 2016	Absent	N/A				Boto					Plankton	1	6	6	6	14	6	9	7	23	98	128	79	71	76	63	86	51	43	42	58	57	47	51
Fastuoscolex	Sepkoski, 2002	Annelida	Polychaeta		PHYLLODOCEMORPHA		C	Mosc-u	C	Mosc-u	Demersal	Nektobenthos	Generalized Polychaete (Anguilliform Swimmers, Crawlers, and Burrowers)	0.75	Brusca et al., 2016	Absent	N/A			Tojonian	Tojo-l					Demersus	3	47	27	28	75	12	4	44	68	170	164	146	131	94	157	128	117	175	201	231	186	170	198
Fossundecima	Sepkoski, 2002	Annelida	Polychaeta		PHYLLODOCEMORPHA		C	Mosc-u	C	Mosc-u	Demersal	Nektobenthos	Generalized Polychaete (Anguilliform Swimmers, Crawlers, and Burrowers)	0.75	Brusca et al., 2016	Absent	N/A				Tojo-u					Nekton	5	11	13	9	25	12	13	23	60	73	78	83	60	31	55	53	67	113	68	76	77	108	138
Glycerites	Sepkoski, 2002	Annelida	Polychaeta		PHYLLODOCEMORPHA		O	u	D	m	Demersal	Nektobenthos	Generalized Polychaete (Anguilliform Swimmers, Crawlers, and Burrowers)	0.75	Brusca et al., 2016	Absent	N/A				Tojo					P Mean Confidence	1	0.708333	0.708333	0.708333	0.75	0.875	0.722222	0.678571	0.73913	0.821429	0.775391	0.75	0.771127	0.815789	0.646825	0.686047	0.602941	0.575581	0.511905	0.543103	0.54386	0.558511	0.563725
Hystriciola	Sepkoski, 2002	Annelida	Polychaeta		PHYLLODOCEMORPHA		C	Mosc-u	C	Mosc-u	Demersal	Nektobenthos	Generalized Polychaete (Anguilliform Swimmers, Crawlers, and Burrowers)	0.75	Brusca et al., 2016	Absent	N/A		Middle Cambrian	lower Middle Cambrian	lMid-l	Age 5	Epoch 3			D Mean Confidence	0.583333	0.75	0.75	0.714286	0.76	0.645833	0.4375	0.517045	0.727941	0.730882	0.724085	0.686644	0.719466	0.718085	0.732484	0.699219	0.726496	0.784286	0.774876	0.712121	0.701613	0.683824	0.65404
Ildraites	Sepkoski, 2002	Annelida	Polychaeta		PHYLLODOCEMORPHA		O	Aren	D	Fame-l	Demersal	Nektobenthos	Generalized Polychaete (Anguilliform Swimmers, Crawlers, and Burrowers)	0.75	Brusca et al., 2016	Absent	N/A				lMid-u					N Mean Confidence	0.5	0.454545	0.442308	0.416667	0.68	0.854167	0.865385	0.826087	0.870833	0.873288	0.903846	0.858434	0.825	0.927419	0.772727	0.768868	0.761194	0.74115	0.761029	0.736842	0.808442	0.770833	0.78442
Levisettius	Sepkoski, 2002	Annelida	Polychaeta		PHYLLODOCEMORPHA		C	Mosc-u	C	Mosc-u	Demersal	Nektobenthos	Generalized Polychaete (Anguilliform Swimmers, Crawlers, and Burrowers)	0.75	Brusca et al., 2016	Absent	N/A				lMid
Ottawina	Sepkoski, 2002	Annelida	Polychaeta		PHYLLODOCEMORPHA		O	Cara-m	O	Cara-m	Demersal	Nektobenthos	Generalized Polychaete (Anguilliform Swimmers, Crawlers, and Burrowers)	0.75	Brusca et al., 2016	Absent	N/A			mid Middle Cambrian	mMid-l					Klug et al. (2010) Classifications, SSCG Diversity
Palaeochaeta	Sepkoski, 2002	Annelida	Polychaeta		PHYLLODOCEMORPHA		S	?	D	Fras	Demersal	Nektobenthos	Generalized Polychaete (Anguilliform Swimmers, Crawlers, and Burrowers)	0.75	Brusca et al., 2016	Absent	N/A				mMid-u						Cambrian								Ordovician					Silurian				Devonian
Paleonereites	Sepkoski, 2002	Annelida	Polychaeta		PHYLLODOCEMORPHA		O	Cara-m	O	Cara-m	Demersal	Nektobenthos	Generalized Polychaete (Anguilliform Swimmers, Crawlers, and Burrowers)	0.75	Brusca et al., 2016	Absent	N/A				mMid						Tomm	Atda	Boto	Tojo	Age 5	Dres	Paib	Tremp	Trema	Aren	Darr	Cara	Ashg	Lland	Wenl	Ludl	Prid	Loch	Prag	Emsi	Eife	Give	Fras
Pieckonia	Sepkoski, 2002	Annelida	Polychaeta		PHYLLODOCEMORPHA		C	Mosc-u	C	Mosc-u	Demersal	Nektobenthos	Generalized Polychaete (Anguilliform Swimmers, Crawlers, and Burrowers)	0.75	Brusca et al., 2016	Absent	N/A			upper Middle Cambrian	uMid-l					Nekton	0	0	0	0	0	0	0	0	1	31	19	17	16	3	17	18	17	55	62	116	125	175	230
Pronereites	Sepkoski, 2002	Annelida	Polychaeta		PHYLLODOCEMORPHA		O	Cara-l	O	Cara-l	Demersal	Nektobenthos	Generalized Polychaete (Anguilliform Swimmers, Crawlers, and Burrowers)	0.75	Brusca et al., 2016	Absent	N/A				uMid-m					Demersus	2	6	6	4	11	0	1	42	44	128	120	95	86	61	132	103	104	151	109	82	55	46	50
Protonympha	Sepkoski, 2002	Annelida	Polychaeta		PHYLLODOCEMORPHA		D	Fras-u	D	Fras-u	Demersal	Nektobenthos	Generalized Polychaete (Anguilliform Swimmers, Crawlers, and Burrowers)	0.75	Brusca et al., 2016	Absent	N/A				uMid-u					Plankton	0	0	0	0	0	0	0	0	2	67	100	63	55	66	53	69	36	30	28	31	35	22	22
Rutellifrons	Sepkoski, 2002	Annelida	Polychaeta		PHYLLODOCEMORPHA		C	Mosc-u	C	Mosc-u	Demersal	Nektobenthos	Generalized Polychaete (Anguilliform Swimmers, Crawlers, and Burrowers)	0.75	Brusca et al., 2016	Absent	N/A				uMid
Thalenessites	Sepkoski, 2002	Annelida	Polychaeta		PHYLLODOCEMORPHA		O	Cara-m	O	Cara-m	Demersal	Nektobenthos	Generalized Polychaete (Anguilliform Swimmers, Crawlers, and Burrowers)	0.75	Brusca et al., 2016	Absent	N/A		Upper Cambrian	Dresbachian	Dres-l	Drumian				Klug et al. (2010) Diversity, Our Classifications
Ungulites	Sepkoski, 2002	Annelida	Polychaeta		PHYLLODOCEMORPHA		O	Cara-m	P	l	Demersal	Nektobenthos	Generalized Polychaete (Anguilliform Swimmers, Crawlers, and Burrowers)	0.75	Brusca et al., 2016	Absent	N/A				Dres-u	Guzhangian					Cambrian								Ordovician					Silurian				Devonian
Biconulites	Sepkoski, 2002	Annelida	Polychaeta		uncertain		Cm	l	Cm	Tojo	Demersal	Nektobenthos	Most Polychaetes Anguilliform Swimmers, Crawlers, and Burrowers	0	Brusca et al., 2016	Absent	N/A				Dres						Tomm	Atda	Boto	Tojo	Age 5	Dres	Paib	Tremp	Trema	Aren	Darr	Cara	Ashg	Lland	Wenl	Ludl	Prid	Loch	Prag	Emsi	Eife	Give	Fras
Bundenbachochaeta	Sepkoski, 2002	Annelida	Polychaeta		uncertain		D	Emsi-l	D	Emsi-l	Demersal	Nektobenthos	Most Polychaetes Anguilliform Swimmers, Crawlers, and Burrowers	0	Brusca et al., 2016	Absent	N/A			Franconian	Fran-l	Paibian	Furongian			Eunekton	0	0	0	0	0	0	0	0	0	10	5	12	11	3	17	19	13	27	15	27	35	47	79
Campylites	Sepkoski, 2002	Annelida	Polychaeta		uncertain		O	Llde-u	S	Prid	Demersal	Nektobenthos	Most Generalized Polychaetes Anguilliform Swimmers, Crawlers, and Burrowers	0	Brusca et al., 2016	Absent	N/A				Fran-u					Planktonekton	0	1	0	0	0	0	0	0	0	0	0	0	0	0	6	5	13	13	2	0	0	1	0
Ebetallites	Sepkoski, 2002	Annelida	Polychaeta		uncertain		S	u	D	l	Demersal	Nektobenthos	Most Generalized Polychaetes Anguilliform Swimmers, Crawlers, and Burrowers	0	Brusca et al., 2016	Absent	N/A				Fran					Nektobenthos	0	0	0	0	1	0	1	5	0	0	0	5	4	13	22	25	35	30	27	23	14	18	21
Eopolychaetus	Sepkoski, 2002	Annelida	Polychaeta		uncertain		O	Cara-m	O	Cara-m	Demersal	Nektobenthos	Most Generalized Polychaetes Anguilliform Swimmers, Crawlers, and Burrowers	0	Brusca et al., 2016	Absent	N/A			Trempealeauan	Trep-l	Jiangshanian				Eudemersus	1	2	3	2	6	0	0	37	44	135	124	89	81	30	75	56	33	35	34	74	74	71	104
Eotrophonia	Sepkoski, 2002	Annelida	Polychaeta		uncertain		O	Cara-u	O	Cara-u	Demersal	Nektobenthos	Most Generalized Polychaetes Anguilliform Swimmers, Crawlers, and Burrowers	0	Brusca et al., 2016	Absent	N/A				Trep-u	Age 10				Nektoplankton	0	0	0	0	0	0	0	0	0	14	9	3	2	0	1	2	0	0	3	10	8	10	10
Insulicorypha	Sepkoski, 2002	Annelida	Polychaeta		uncertain		Cm	mMid-u	Cm	mMid-u	Demersal	Nektobenthos	Most Generalized Polychaetes Anguilliform Swimmers, Crawlers, and Burrowers	0	Brusca et al., 2016	Absent	N/A				Trep					Euplankton	0	0	0	0	0	0	0	0	2	67	100	62	55	66	53	69	36	30	28	31	35	22	22
Klakesia	Sepkoski, 2002	Annelida	Polychaeta		uncertain		S	Ldov-u	S	Ldov-u	Demersal	Nektobenthos	Most Generalized Polychaetes Anguilliform Swimmers, Crawlers, and Burrowers	0	Brusca et al., 2016	Absent	N/A		Middle Ordovician	Tremadocian	Trem-l	Tremadocian	Early Ordovician
Lecathylus	Sepkoski, 2002	Annelida	Polychaeta		uncertain		S	Ludl	S	Ludl	Demersal	Nektobenthos	Most Generalized Polychaetes Anguilliform Swimmers, Crawlers, and Burrowers	0	Brusca et al., 2016	Absent	N/A				Trem-u				SSCG Ranged-Through Nektic Generic Diversity
Lockportia	Sepkoski, 2002	Annelida	Polychaeta		uncertain		S	Wenl	S	Wenl	Demersal	Nektobenthos	Most Generalized Polychaetes Anguilliform Swimmers, Crawlers, and Burrowers	0	Brusca et al., 2016	Absent	N/A				Trem						Cambrian								Ordovician					Silurian				Devonian
Nawnites	Sepkoski, 2002	Annelida	Polychaeta		uncertain		D	Fras-m	D	Fras-m	Demersal	Nektobenthos	Most Generalized Polychaetes Anguilliform Swimmers, Crawlers, and Burrowers	0	Brusca et al., 2016	Absent	N/A			Arengian	Aren-l	Floian					Tomm	Atda	Boto	Tojonian	Stage 5	Dres	Paibian	Tremp	Trema	Arenig	Darr	Cara	Ashg	Llan	Wenlock	Ludlow	Pridoli	Loch	Pragian	Emsian	Eifelian	Givetian	Frasnian
Pontobdellopsis	Sepkoski, 2002	Annelida	Polychaeta		uncertain		O	Cara-m	O	Cara-m	Demersal	Nektobenthos	Most Generalized Polychaetes Anguilliform Swimmers, Crawlers, and Burrowers	0	Brusca et al., 2016	Absent	N/A				Aren-u	Dapingian	Middle Ordovician		EN	Heterostraci	0	0	0	0	0	0	0	0	0	0	0	0	0	0	0	0	4	24	22	14	2	1	0
Propolynoe	Sepkoski, 2002	Annelida	Polychaeta		uncertain		O	Cara-u	O	Cara-u	Demersal	Nektobenthos	Most Generalized Polychaetes Anguilliform Swimmers, Crawlers, and Burrowers	0	Brusca et al., 2016	Absent	N/A				Aren					Anaspida	0	0	0	0	0	0	0	0	0	0	0	0	0	1	6	4	2	3	0	0	0	0	0
Ramesses	Sepkoski, 2002	Annelida	Polychaeta		uncertain		C	Serp-l	C	Serp-l	Demersal	Nektobenthos	Most Generalized Polychaetes Anguilliform Swimmers, Crawlers, and Burrowers	0	Brusca et al., 2016	Absent	N/A			Llanvirnian	Llvi-l	Darriwilian				Thelodonti	0	0	0	0	0	0	0	0	0	0	0	0	0	2	6	7	7	10	1	0	0	0	0
Ruedemannella	Sepkoski, 2002	Annelida	Polychaeta		uncertain		S	Prid	S	Prid	Demersal	Nektobenthos	Most Generalized Polychaetes Anguilliform Swimmers, Crawlers, and Burrowers	0	Brusca et al., 2016	Absent	N/A				Llvi-u					Placodermi	0	0	0	0	0	0	0	0	0	0	0	0	0	0	0	0	0	0	1	2	7	12	33
Soris	Sepkoski, 2002	Annelida	Polychaeta		uncertain		C	Serp-l	C	Serp-l	Demersal	Nektobenthos	Most Generalized Polychaetes Anguilliform Swimmers, Crawlers, and Burrowers	0	Brusca et al., 2016	Absent	N/A				Llvi					Acanthodii	0	0	0	0	0	0	0	0	0	0	0	0	0	1	2	6	15	27	11	12	16	17	18
Stephanoscolex	Sepkoski, 2002	Annelida	Polychaeta		uncertain		Cm	mMid-u	Cm	mMid-u	Demersal	Nektobenthos	Most Generalized Polychaetes Anguilliform Swimmers, Crawlers, and Burrowers	0	Brusca et al., 2016	Absent	N/A			Llandeilian	Llde-l					Chondrichthyes	0	0	0	0	0	0	0	0	0	0	0	0	0	0	0	0	0	6	3	0	2	7	12
Stoma	Sepkoski, 2002	Annelida	Polychaeta		uncertain		O	Ashg	O	Ashg	Demersal	Nektobenthos	Most Generalized Polychaetes Anguilliform Swimmers, Crawlers, and Burrowers	0	Brusca et al., 2016	Absent	N/A				Llde-u					Actinopterygii	0	0	0	0	0	0	0	0	0	0	0	0	0	0	0	3	1	1	0	0	3	5	3
Tubulelloides	Sepkoski, 2002	Annelida	Polychaeta		uncertain		O	Cara-m	O	Cara-m	Demersal	Nektobenthos	Most Generalized Polychaetes Anguilliform Swimmers, Crawlers, and Burrowers	0	Brusca et al., 2016	Absent	N/A				Llde					Sarcopterygii	0	0	0	0	0	0	0	0	0	0	0	0	0	0	0	0	0	0	0	1	1	6	9
Gilsonicaris	Sepkoski, 2002	Arthropoda	Branchiopoda		uncertain		D	Emsi-l	D	Emsi-l	Demersal	Nektobenthos	Detritivour, Generally Depressed, Extant Taxa Swim & Crawl	0.75	Tasch, 1969	Absent	N/A			Caradocian	Cara-l	Sandbian	Late Ordovician			Tarphycerida	0	0	0	0	0	0	0	0	0	10	5	12	11	1	11	7	1	0	0	1	4	7	1
"Peytoia"	Vinther et al., 2014	Arthropoda	Dinocardia		RADIODONTA	Anomalocarida	Cm	Boto	Cm	Boto	Demersal	Eudemersus	Depressiform, Analogous to Extant Sepiida	0.75	Whittington & Briggs, 1985	Absent	Demersal				Cara-m					Nautilida	0	0	0	0	0	0	0	0	0	0	0	0	0	0	0	0	0	1	2	2	5	5	0
Amplectobelua	Vinther et al., 2014	Arthropoda	Dinocardia		RADIODONTA	Anomalocarida	Cm	Tomm	Cm	uMid-u	Demersal	Eudemersus	Depressiform, Analogous to Extant Sepiida	0.75	Whittington & Briggs, 1985	Absent	Demersal				Cara-u	Katian				Ammonoidea	0	0	0	0	0	0	0	0	0	0	0	0	0	0	0	0	0	0	0	16	13	17	26
Anomalocaris	Sepkoski, 2002	Arthropoda	Dinocardia		RADIODONTA	Anomalocarida	Cm	Atda-l	Cm	uMid-m	Demersal	Eudemersus	Depressiform, Analogous to Extant Sepiida	0.75	Whittington & Briggs, 1985	Present	Demersal				Cara					Other Cephalopoda	0	0	0	0	0	0	0	0	0	0	0	0	0	0	0	0	0	0	0	2	1	1	1
Anomalocaris briggsi	Vinther et al., 2014	Arthropoda	Dinocardia		RADIODONTA	Anomalocarida	Cm	Tojo	Cm	Tojo	Demersal	Eudemersus	Depressiform, Analogous to Extant Sepiida	0.75	Whittington & Briggs, 1985	Absent	Demersal		Upper Ordovician	Ashgillian	Ashg-l					Arthropoda	0	0	0	0	2	0	0	0	0	0	0	0	0	0	0	0	0	0	0	0	0	0	0
Fezouata hurdiid	Vinther et al., 2014	Arthropoda	Dinocardia		RADIODONTA	Anomalocarida	O	Trem	O	Trem	Demersal	Eudemersus	Depressiform, Analogous to Extant Sepiida	0.75	Whittington & Briggs, 1985	Absent	Demersal				Ashg-m				PN	Cephalochordata	0	1	0	0	0	0	0	0	0	0	0	0	0	0	0	0	0	0	0	0	0	0	0
Hurdia	Sepkoski, 2002	Arthropoda	Dinocardia		RADIODONTA	Anomalocarida	Cm	mMid-u	Cm	mMid-u	Demersal	Eudemersus	Depressiform, Analogous to Extant Sepiida	0.75	Whittington & Briggs, 1985	Present	Demersal				Ashg-u	Hirnantian				Conodonta	0	0	0	0	8	9	10	16	45	54	62	60	39	22	20	16	16	19	17	14	15	18	21
Paranomalocaris	Vinther et al., 2014	Arthropoda	Dinocardia		RADIODONTA	Anomalocarida	Cm	Boto	Cm	Boto	Demersal	Eudemersus	Depressiform, Analogous to Extant Sepiida	0.75	Whittington & Briggs, 1985	Absent	Demersal				Ashg					Cyclostomata	0	0	0	0	0	0	0	0	0	0	0	0	0	0	0	0	0	0	0	0	0	1	0
Peytoia	Vinther et al., 2014	Arthropoda	Dinocardia		RADIODONTA	Anomalocarida	Cm	uMid-u	Cm	uMid-u	Demersal	Eudemersus	Depressiform, Analogous to Extant Sepiida	0.75	Whittington & Briggs, 1985	Absent	Demersal		Lower Silurian	Llandoverian	Ldov-l	Rhuddanian	Llandovery			Heterostraci	0	0	0	0	0	0	0	0	0	0	0	0	0	0	6	5	14	15	2	0	0	0	0
Schinderhannes	Vinther et al., 2014	Arthropoda	Dinocardia		RADIODONTA	Anomalocarida	D	Emsi-l	D	Emsi-l	Demersal	Eudemersus	Depressiform, Analogous to Extant Sepiida	0.75	Whittington & Briggs, 1985	Absent	Demersal				Ldov-m	Aeronian				Chaetognatha	5	4	5	2	3	1	0	0	0	1	0	0	0	0	0	0	0	0	0	0	0	0	0
Stanleycaris	Vinther et al., 2014	Arthropoda	Dinocardia		RADIODONTA	Anomalocarida	Cm	uMid-u	Cm	uMid-u	Demersal	Eudemersus	Depressiform, Analogous to Extant Sepiida	0.75	Whittington & Briggs, 1985	Absent	Demersal				Ldov-u	Telychian				Coleoidea	0	0	0	0	0	0	0	0	0	0	0	0	0	0	0	0	0	0	0	1	0	0	0
Tamisiocaris	Vinther et al., 2014	Arthropoda	Dinocardia		RADIODONTA	Anomalocarida	Cm	Atda	Cm	Atda	Demersal	Eudemersus	Depressiform, Analogous to Extant Sepiida	0.75	Whittington & Briggs, 1985	Absent	Demersal				Ldov					Trilobita	0	0	0	0	1	0	1	3	9	4	7	6	5	0	0	0	0	0	0	0	0	0	0
Caryosyntrips	Vinther et al., 2014	Arthropoda	Dinocardia		RADIODONTA		Cm	uMid-u	Cm	uMid-u	Demersal	Eudemersus	Depressiform, Analogous to Extant Sepiida	0.75	Whittington & Briggs, 1985	Absent	Demersal		Middle Silurian	Wenlockian	Wenl-l	Sheinwoodian	Wenlock			Thylacocephala	0	1	3	3	3	1	1	2	2	1	1	1	1	1	0	0	0	0	0	1	1	1	2
Cassubia	Sepkoski, 2002	Arthropoda	Dinocardia		RADIODONTA		Cm	Atda-l	Cm	Atda-l	Demersal	Eudemersus	Depressiform, Analogous to Extant Sepiida	0.75	Whittington & Briggs, 1985	Present	Demersal				Wenl-u	Homerian				Malacostraca	0	3	2	2	2	0	0	0	2	2	2	3	3	2	4	5	7	7	9	10	7	10	12
Cerabonusoides	Sepkoski, 2002	Arthropoda	Dinocardia		RADIODONTA		Cm	Tomm	Cm	Tomm	Demersal	Eudemersus	Depressiform, Analogous to Extant Sepiida	0.75	Whittington & Briggs, 1985	Present	Demersal				Wenl					Other Arthropoda	0	1	2	2	3	1	1	2	2	1	1	1	1	0	0	0	0	0	0	0	0	0	0
Kerygmachela	Sepkoski, 2002	Arthropoda	Dinocardia		RADIODONTA		Cm	Boto	Cm	Boto	Demersal	Eudemersus	Depressiform, Analogous to Extant Sepiida	0.75	Whittington & Briggs, 1985	Present	Demersal		Upper Silurian	Ludlovian	Ludl-l	Gorstian	Ludlow			Problematica	0	1	1	0	3	0	0	0	0	0	0	0	0	1	0	0	0	0	0	0	0	0	0
Laggani	Sepkoski, 2002	Arthropoda	Dinocardia		RADIODONTA		Cm	mMid-u	Cm	mMid-u	Demersal	Eudemersus	Depressiform, Analogous to Extant Sepiida	0.75	Whittington & Briggs, 1985	Present	Demersal				Ludl-u	Ludfordian
Myoscolex	Sepkoski, 2002	Arthropoda	Dinocardia		RADIODONTA		Cm	Boto	Cm	mMid	Demersal	Eudemersus	Depressiform, Analogous to Extant Sepiida	0.75	Whittington & Briggs, 1985	Present	Demersal				Ludl				SSCG Ranged-Through Demersal Generic Diversity
Opabinia	Sepkoski, 2002	Arthropoda	Dinocardia		RADIODONTA		Cm	mMid-u	Cm	mMid-u	Demersal	Eudemersus	Swimming Setal Structures, Depressiform, Analogous to Extant Sepiida	0.75	Budd & Daley, 2012	Present	Demersal			Pridoli	Prid	Pridoli					Cambrian								Ordovician					Silurian				Devonian
Pambdelurion	Vinther et al., 2014	Arthropoda	Dinocardia		RADIODONTA		Cm	Atda	Cm	Atda	Demersal	Eudemersus	Depressiform, Analogous to Extant Sepiida	0.75	Whittington & Briggs, 1985	Absent	Demersal		Lower Devonian	Gedinnian	Gedi-l	Lochkovian	Early Devonian				Tomm	Atda	Boto	Tojonian	Stage 5	Dres	Paibian	Tremp	Trema	Arenig	Darr	Cara	Ashg	Llan	Wenlock	Ludlow	Pridoli	Loch	Pragian	Emsian	Eifelian	Givetian	Frasnian
Proboscicaris	Sepkoski, 2002	Arthropoda	Dinocardia		RADIODONTA		Cm	mMid-u	Cm	uMid-l	Demersal	Eudemersus	Depressiform, Analogous to Extant Sepiida	0.75	Whittington & Briggs, 1985	Present	Demersal				Gedi-u				NB	Heterostraci	0	0	0	0	0	0	0	0	0	0	0	0	0	0	0	0	0	0	8	1	0	0	0
Burgessia	Sepkoski, 2002	Arthropoda	Incertae Sedis		uncertain		Cm	mMid-u	Cm	mMid-u	Demersal	Eudemersus	Depressiform, Paddle-like Exopods, Comparison to Limulus	0.75	Lin, 2009; Ortega-Hernández et al., 2013	Absent	N/A				Gedi					Thelodonti	0	0	0	0	0	0	0	0	0	0	0	2	2	6	10	4	6	14	4	4	4	2	1
Cambropachycope	Sepkoski, 2002	Arthropoda	Incertae Sedis		uncertain		Cm	Dres-l	Cm	Dres-l	Demersal	Nektobenthos	Relatively-Large Posterior Uniramous Paddle-Shaped Exopods, Slender Anterior Uniramous Likely-Walking Limbs, Not Well Streamlined, ~1.8 mm	0.5	Walossek & Müller, 1992	Absent	N/A			Siegenian	Sieg-l	Pragian				Galeaspida	0	0	0	0	0	0	0	0	0	0	0	0	0	6	5	1	1	11	8	2	0	0	0
Henningsmoenicaris	Sepkoski, 2002	Arthropoda	Incertae Sedis		uncertain		Cm	Dres-l	Cm	Dres-l	Demersal	Nektobenthos	Blade-like Paddle-Shaped Exopods, Similar to Agnostus, Somewhat Depressed Shield	0.5	Walossek & Müller, 1990	Absent	N/A				Sieg-u					Osteostraci	0	0	0	0	0	0	0	0	0	0	0	1	0	0	4	2	6	26	17	7	2	1	2
Leanchoilia	Sepkoski, 2002	Arthropoda	Incertae Sedis		uncertain		Cm	mMid-u	Cm	mMid-u	Demersal	Eudemersus	Depressiform, Paddle-Shaped Exopods, No Walking Limbs	1	Briggs & Whittington, 1985; Haug et al., 2012	Absent	N/A				Sieg					Placodermi	0	0	0	0	0	0	0	0	0	0	0	0	0	0	0	0	0	5	3	10	14	15	16
Martinssonia	Sepkoski, 2002	Arthropoda	Incertae Sedis		uncertain		Cm	Dres-l	Cm	Dres-l	Demersal	Nektobenthos	Crustacean-like	0.25	Walossek & Müller, 1992	Absent	N/A			Emsian	Emsi-l	Emsian				Chondrichthyes	0	0	0	0	0	0	0	0	0	0	0	0	0	0	0	0	0	0	0	0	0	0	0
Plenocaris	Sepkoski, 2002	Arthropoda	Incertae Sedis		uncertain		Cm	mMid-l	Cm	mMid-u	Demersal	Nektobenthos	Swimming Lobate Rami, Walking/Perching Anterior Limbs	1	Briggs & Whittington, 1985	Absent	N/A				Emsi-u					Actinopterygii	0	0	0	0	0	0	0	0	0	0	0	0	0	0	0	0	0	0	0	0	0	0	1
Rehbachiella	Sepkoski, 2002	Arthropoda	Incertae Sedis		uncertain		Cm	Dres-l	Cm	Dres-l	Planktic	Nektoplankton	Paddle-Shaped Exopodites, Filter Apparatus, Smooth Carapace, Very Small (~0.65 mm)	1	Müller, 1983	Absent	N/A				Emsi					Sarcopterygii	0	0	0	0	0	0	0	0	0	0	0	0	0	0	0	0	0	3	3	3	5	27	27
Walossekia	Sepkoski, 2002	Arthropoda	Incertae Sedis		uncertain		Cm	Dres-l	Cm	Dres-l	Planktic	Nektoplankton	Paddle-Shaped Exopodites, Filter Apparatus, Streamlined Carapace, Very Small (~0.3 mm)	1	Müller, 1983	Absent	N/A		Middle Devonian	Eifelian	Eife-l	Eifelian	Middle Devonian			Holothuroidea	0	0	0	0	0	0	0	0	0	0	0	0	0	0	0	0	0	0	0	0	1	1	1
Aenigmacaris	Sepkoski, 2002	Arthropoda	Malacostraca		AESCHRONECTIDA		C	Serp-l	C	Step-u	Demersal	Nektobenthos	"Upraised Posture"	0.25	Hyžny et al., 2014	Absent	N/A				Eife-u					Plectonocerida	0	0	0	0	0	0	1	5	0	0	0	0	0	0	0	0	0	0	0	0	0	0	0
Aratidecthes	Sepkoski, 2002	Arthropoda	Malacostraca		AESCHRONECTIDA		C	Mosc-u	C	Mosc-u	Demersal	Nektobenthos	"Upraised Posture"	0.25	Hyžny et al., 2014	Absent	N/A				Eife					Tentaculitida	0	0	0	0	0	0	0	0	1	1	1	1	1	3	7	7	7	6	12	9	8	8	11
Crangopsis	Sepkoski, 2002	Arthropoda	Malacostraca		AESCHRONECTIDA		C	Vise-l	C	Serp-l	Nektic	Planktonekton	Off-shore Facies, Small (mm Scale)	0.5	Schram, 1981	Absent	N/A			Givetian	Give-l	Givetian				Annelida	0	0	0	1	3	0	0	0	0	1	2	13	5	5	5	5	7	5	4	5	4	3	5
Joanellia	Sepkoski, 2002	Arthropoda	Malacostraca		AESCHRONECTIDA		C	Vise-l	C	Serp	Demersal	Nektobenthos	"Upraised Posture"	0.25	Hyžny et al., 2014	Absent	N/A				Give-u					Trilobita	0	3	1	1	4	1	0	1	20	31	33	31	33	21	21	18	22	43	58	72	54	23	9
Kallidecthes	Sepkoski, 2002	Arthropoda	Malacostraca		AESCHRONECTIDA		C	Vise	C	Mosc-u	Demersal	Nektobenthos	"Upraised Posture"	0.25	Hyžny et al., 2014	Absent	N/A				Give					Marrelomorpha	0	0	0	0	1	0	0	0	0	0	0	0	1	0	0	0	0	0	0	2	0	0	0
Aristozoe	Sepkoski, 2002	Arthropoda	Malacostraca		ARCHAEOSTRACA		S	Wenl	D	Eife-u	Nektic	Planktonekton	Pelagic, Streamlined, Weak-Swimmer, Compressiform, Small	0.75	Rolfe, 1969; Crasquin et al., 2009	Absent	N/A		Upper Devonian	Frasnian	Fras-l	Frasnian	Late Devonian			Merostomoidea	0	2	0	0	6	0	0	0	0	0	0	0	0	0	0	0	0	0	0	0	0	0	0
Baituganocaris	Sepkoski, 2002	Arthropoda	Malacostraca		ARCHAEOSTRACA		D	Fras	D	Fras	Nektic	Planktonekton	Pelagic, Streamlined, Weak-Swimmer, Compressiform, Small	0.75	Rolfe, 1969; Crasquin et al., 2009	Absent	N/A				Fras-m					Eurypterida	0	0	0	0	0	0	0	0	0	0	1	6	6	17	22	23	31	18	15	13	3	2	3
Callizoe	Sepkoski, 2002	Arthropoda	Malacostraca		ARCHAEOSTRACA		D	Sieg-l	D	Sieg-u	Nektic	Planktonekton	Pelagic, Streamlined, Weak-Swimmer, Compressiform, Small	0.75	Rolfe, 1969; Crasquin et al., 2009	Absent	N/A				Fras-u					Xiphosurida	0	0	0	0	0	0	0	0	0	0	0	0	0	2	1	5	2	0	0	2	1	1	3
Caryocaris	Sepkoski, 2002	Arthropoda	Malacostraca		ARCHAEOSTRACA		O	Trem-l	O	u	Nektic	Planktonekton	Laterally Expanded Telson and Furcal Rami, Streamlined Carapace, Cosmopolitan	0.5	Vannier et al., 1997; Racheboeuf & Crasquin, 2009	Absent	N/A				Fras					Ostracoda	0	31	15	16	33	7	2	0	1	1	1	2	2	2	3	2	2	2	1	1	1	1	1
Ceratiocaris	Sepkoski, 2002	Arthropoda	Malacostraca		ARCHAEOSTRACA		O	Trem	P	u	Nektic	Planktonekton	Pelagic, Streamlined, Weak-Swimmer, Compressiform, Small	0.75	Rolfe, 1969; Crasquin et al., 2009	Absent	N/A			Famennian	Fame-l	Famennian				Malacostraca	0	0	1	1	2	1	1	1	1	1	0	0	0	0	0	0	0	0	0	0	0	2	1
Dictyocaris	Sepkoski, 2002	Arthropoda	Malacostraca		ARCHAEOSTRACA		S	Wenl	D	l	Nektic	Planktonekton	Pelagic, Streamlined, Weak-Swimmer, Compressiform, Small	0.75	Rolfe, 1969; Crasquin et al., 2009	Absent	N/A				Fame-m				ED	Pteraspidomorphi	0	0	0	0	0	0	0	0	0	3	4	4	1	1	2	2	3	6	1	1	4	5	4
Dilophaspis	Sepkoski, 2002	Arthropoda	Malacostraca		ARCHAEOSTRACA		D	Emsi-l	D	Emsi-l	Nektic	Planktonekton	Pelagic, Streamlined, Weak-Swimmer, Compressiform, Small	0.75	Rolfe, 1969; Crasquin et al., 2009	Absent	N/A				Fame-u					Galeaspida	0	0	0	0	0	0	0	0	0	0	0	0	0	0	0	0	0	1	10	1	0	0	0
Dithyrocaris	Sepkoski, 2002	Arthropoda	Malacostraca		ARCHAEOSTRACA		D	Give-l	P	u	Nektic	Planktonekton	Pelagic, Streamlined, Weak-Swimmer, Compressiform, Small	0.75	Rolfe, 1969; Crasquin et al., 2009	Absent	N/A				Fame					Osteostraci	0	0	0	0	0	0	0	0	0	0	0	0	0	0	5	5	4	2	4	3	0	0	0
Echinocaris	Sepkoski, 2002	Arthropoda	Malacostraca		ARCHAEOSTRACA		D	Give-l	D	Fame-u	Nektic	Planktonekton	Pelagic, Streamlined, Weak-Swimmer, Compressiform, Small	0.75	Rolfe, 1969; Crasquin et al., 2009	Absent	N/A		Mississippian	Tournaisian	Tour-l	Tournaisian	Mississippian			Placodermi	0	0	0	0	0	0	0	0	0	0	0	0	0	0	0	0	0	12	31	32	23	21	43
Eleutherocaris	Sepkoski, 2002	Arthropoda	Malacostraca		ARCHAEOSTRACA		D	Fras-m	D	Fras-m	Nektic	Planktonekton	Pelagic, Streamlined, Weak-Swimmer, Compressiform, Small	0.75	Rolfe, 1969; Crasquin et al., 2009	Absent	N/A				Tour-u					Chondrichthyes	0	0	0	0	0	0	0	0	0	0	0	0	0	0	0	0	0	0	0	0	0	2	3
Elymocaris	Sepkoski, 2002	Arthropoda	Malacostraca		ARCHAEOSTRACA		D	Give-u	D	Fame-l	Nektic	Planktonekton	Pelagic, Streamlined, Weak-Swimmer, Compressiform, Small	0.75	Rolfe, 1969; Crasquin et al., 2009	Absent	N/A				Tour					Sarcopterygii	0	0	0	0	0	0	0	0	0	0	0	0	0	0	0	0	0	0	2	2	2	6	4
Gonatocaris	Sepkoski, 2002	Arthropoda	Malacostraca		ARCHAEOSTRACA		S	Ludl-l	S	Ludl-l	Nektic	Planktonekton	Pelagic, Streamlined, Weak-Swimmer, Compressiform, Small	0.75	Rolfe, 1969; Crasquin et al., 2009	Absent	N/A			Visean	Vise-l	Visean				Protactinocerida	0	0	0	0	0	0	0	4	0	0	0	0	0	0	0	0	0	0	0	0	0	0	0
Guerichicaris	Sepkoski, 2002	Arthropoda	Malacostraca		ARCHAEOSTRACA		D	Eife-u	D	Eife-u	Nektic	Planktonekton	Pelagic, Streamlined, Weak-Swimmer, Compressiform, Small	0.75	Rolfe, 1969; Crasquin et al., 2009	Absent	N/A				Vise-u					Yanhecerida	0	0	0	0	0	0	0	4	0	0	0	0	0	0	0	0	0	0	0	0	0	0	0
Hebertocaris	Sepkoski, 2002	Arthropoda	Malacostraca		ARCHAEOSTRACA		D	Give-l	D	Give-l	Nektic	Planktonekton	Pelagic, Streamlined, Weak-Swimmer, Compressiform, Small	0.75	Rolfe, 1969; Crasquin et al., 2009	Absent	N/A				Vise					Ellesmerocerida	0	0	0	0	0	0	0	28	33	43	16	4	2	0	0	0	0	0	0	0	0	0	0
Heroldina	Sepkoski, 2002	Arthropoda	Malacostraca		ARCHAEOSTRACA		D	Sieg-u	D	Emsi-l	Nektic	Planktonekton	Pelagic, Streamlined, Weak-Swimmer, Compressiform, Small	0.75	Rolfe, 1969; Crasquin et al., 2009	Absent	N/A			Serpukhovian	Serp-l	Serpukhovian				Endoceratoidea	0	0	0	0	0	0	0	1	10	70	53	12	10	2	3	0	0	0	0	0	0	0	0
Kerfornecaris	Sepkoski, 2002	Arthropoda	Malacostraca		ARCHAEOSTRACA		S	Prid	S	Prid	Nektic	Planktonekton	Pelagic, Streamlined, Weak-Swimmer, Compressiform, Small	0.75	Rolfe, 1969; Crasquin et al., 2009	Absent	N/A				Serp-u					Actinoceratoidea	0	0	0	0	0	0	0	0	0	10	23	19	15	6	8	5	2	3	2	3	2	1	1
Lebesconteia	Sepkoski, 2002	Arthropoda	Malacostraca		ARCHAEOSTRACA		O	u	C	l	Nektic	Planktonekton	Pelagic, Streamlined, Weak-Swimmer, Compressiform, Small	0.75	Rolfe, 1969; Crasquin et al., 2009	Absent	N/A				Serp					Ascocerida	0	0	0	0	0	0	0	0	0	0	3	3	4	2	1	5	1	0	0	0	0	0	0
Macrocaris	Sepkoski, 2002	Arthropoda	Malacostraca		ARCHAEOSTRACA		C	Tour	C	Tour	Nektic	Planktonekton	Pelagic, Streamlined, Weak-Swimmer, Compressiform, Small	0.75	Rolfe, 1969; Crasquin et al., 2009	Absent	N/A		Pennsylvanian	Bashkirian	Bash-l	Bashkirian	Pennsylvanian			Discosorida	0	0	0	0	0	0	0	0	0	0	5	19	14	7	12	16	9	8	6	18	11	18	30
Montecaris	Sepkoski, 2002	Arthropoda	Malacostraca		ARCHAEOSTRACA		S	Prid	D	Fame-m	Nektic	Planktonekton	Pelagic, Streamlined, Weak-Swimmer, Compressiform, Small	0.75	Rolfe, 1969; Crasquin et al., 2009	Absent	N/A				Bash-u					Oncocerida	0	0	0	0	0	0	0	0	0	2	15	25	32	11	42	24	14	10	9	14	27	15	9
Nahecaris	Sepkoski, 2002	Arthropoda	Malacostraca		ARCHAEOSTRACA		D	Emsi-l	D	Emsi-l	Nektic	Planktonekton	Pelagic, Streamlined, Weak-Swimmer, Compressiform, Small	0.75	Rolfe, 1969; Crasquin et al., 2009	Absent	N/A				Bash					Tarphycerida	0	0	0	0	0	0	0	0	1	7	5	3	3	1	2	0	0	0	0	1	0	0	0
Ohiocaris	Sepkoski, 2002	Arthropoda	Malacostraca		ARCHAEOSTRACA		D	Fame-l	D	Fame-u	Nektic	Planktonekton	Pelagic, Streamlined, Weak-Swimmer, Compressiform, Small	0.75	Rolfe, 1969; Crasquin et al., 2009	Absent	N/A			Moscovian	Mosc-l	Moscovian				Nautilida	0	0	0	0	0	0	0	0	0	0	0	0	0	0	1	0	0	0	0	10	15	10	3
Orozoe	Sepkoski, 2002	Arthropoda	Malacostraca		ARCHAEOSTRACA		D	Sieg-u	D	Emsi-l	Nektic	Planktonekton	Pelagic, Streamlined, Weak-Swimmer, Compressiform, Small	0.75	Rolfe, 1969; Crasquin et al., 2009	Absent	N/A				Mosc-u					Ammonoidea	0	0	0	0	0	0	0	0	0	0	0	0	0	0	0	0	0	0	3	10	5	6	20
Pephricaris	Sepkoski, 2002	Arthropoda	Malacostraca		ARCHAEOSTRACA		D	Fame-l	D	Fame-l	Nektic	Planktonekton	Pelagic, Streamlined, Weak-Swimmer, Compressiform, Small	0.75	Rolfe, 1969; Crasquin et al., 2009	Absent	N/A				Mosc					Radiodonta	2	5	6	4	10	0	0	0	1	0	0	0	0	0	0	0	0	0	0	1	0	0	0
Ptychocaris	Sepkoski, 2002	Arthropoda	Malacostraca		ARCHAEOSTRACA		D	Sieg-l	D	Fras-m	Nektic	Planktonekton	Pelagic, Streamlined, Weak-Swimmer, Compressiform, Small	0.75	Rolfe, 1969; Crasquin et al., 2009	Absent	N/A			Stephanian	Step-l	Kasimovian				Arthropoda	0	3	4	5	7	0	0	0	0	0	0	0	0	0	0	0	0	0	0	0	0	0	0
Pygocaris	Sepkoski, 2002	Arthropoda	Malacostraca		ARCHAEOSTRACA		D	Gedi-u	D	Gedi-u	Nektic	Planktonekton	Pelagic, Streamlined, Weak-Swimmer, Compressiform, Small	0.75	Rolfe, 1969; Crasquin et al., 2009	Absent	N/A				Step-u	Gzhelian
Rhinocaris	Sepkoski, 2002	Arthropoda	Malacostraca		ARCHAEOSTRACA		D	Give-l	D	Fras-m	Nektic	Planktonekton	Pelagic, Streamlined, Weak-Swimmer, Compressiform, Small	0.75	Rolfe, 1969; Crasquin et al., 2009	Absent	N/A				Step				SSCG Ranged-Through Planktic Generic Diversity
Schugurocaris	Sepkoski, 2002	Arthropoda	Malacostraca		ARCHAEOSTRACA		S	u	D	Fras-m	Nektic	Planktonekton	Pelagic, Streamlined, Weak-Swimmer, Compressiform, Small	0.75	Rolfe, 1969; Crasquin et al., 2009	Absent	N/A		Lower Permian	Asselian	Asse-l	Asselian	Cisuralian				Cambrian								Ordovician					Silurian				Devonian
Tropidocaris	Sepkoski, 2002	Arthropoda	Malacostraca		ARCHAEOSTRACA		D	Fras-m	D	Fame-m	Nektic	Planktonekton	Pelagic, Streamlined, Weak-Swimmer, Compressiform, Small	0.75	Rolfe, 1969; Crasquin et al., 2009	Absent	N/A				Asse-u						Tomm	Atda	Boto	Tojonian	Stage 5	Dres	Paibian	Tremp	Trema	Arenig	Darr	Cara	Ashg	Llan	Wenlock	Ludlow	Pridoli	Loch	Pragian	Emsian	Eifelian	Givetian	Frasnian
Belotelson	Sepkoski, 2002	Arthropoda	Malacostraca		BELOTELSONIDEA		C	Tour-u	C	Mosc-u	Demersal	Nektobenthos	nearshore facies	0.25	Briggs & Clarkson, 1990	Absent	N/A				Asse				NP	Tarphycerida	0	0	0	0	0	0	0	0	0	13	8	2	2	0	1	2	0	0	0	0	1	1	0
Branchiocaris	Sepkoski, 2002	Arthropoda	Malacostraca		CANADASPIDIDA		Cm	Atda-u	Cm	uMid-m	Demersal	Eudemersus	Dextrous Anterior Appendage, Swimming Lemellate Appendages, Stabilizing/Steering Telson	0.75	Briggs & Whittington, 1985	Absent	N/A			Sakmarian	Sakm-l					Nautilida	0	0	0	0	0	0	0	0	0	0	0	0	0	0	0	0	0	0	1	1	1	0	0
Canadaspis	Sepkoski, 2002	Arthropoda	Malacostraca		CANADASPIDIDA		Cm	mMid-l	Cm	mMid-u	Demersal	Nektobenthos	Walked, Swimming Possible	0.75	Briggs & Whittington, 1985	Absent	N/A				Sakm-u	Sakmarian				Ammonoidea	0	0	0	0	0	0	0	0	0	0	0	0	0	0	0	0	0	0	1	9	5	9	9
Odaraia	Sepkoski, 2002	Arthropoda	Malacostraca		CANADASPIDIDA		Cm	Atda-u	Cm	mMid-u	Nektic	Planktonekton	Stabilizing/Steering Telson, Appendages Enclosed by Carapace	0.5	Briggs & Whittington, 1985	Absent	N/A				Sakm					Trilobita	0	0	0	0	0	0	5	2	6	10	10	7	7	0	0	0	0	0	0	0	0	0	0
Perspicaris	Sepkoski, 2002	Arthropoda	Malacostraca		CANADASPIDIDA		Cm	Atda-u	Cm	uMid-l	Demersal	Eudemersus	Flap-like Appendages, Swam Near Substrate	1	Briggs & Whittington, 1985	Absent	N/A			Leonardian	Leon-l					Malacostraca	0	0	0	0	0	0	0	0	0	0	0	0	0	0	0	0	0	0	0	0	0	0	0
Nannastacus	Sepkoski, 2002	Arthropoda	Malacostraca		CUMACEA		P	Guad-l	P	Guad-l	Demersal	Nektobenthos	Benthic, can swim	0.75	Hessler, 1969	Absent	N/A				Leon-m	Artinskian				Hydrozoa	0	1	1	1	6	2	2	3	2	3	6	5	4	3	2	3	3	4	3	3	2	3	3
Imocaris	Sepkoski, 2002	Arthropoda	Malacostraca		DECAPODA		C	Serp-l	C	Serp-l	Demersal	Nektobenthos	Uropod, Pereiopods	0.5	Glaessner, 1969	Absent	N/A				Leon-u	Kungurian				Scyphozoa	1	1	1	1	1	1	0	0	1	0	0	0	0	0	0	0	0	0	0	0	0	0	0
Palaeopalaemon	Sepkoski, 2002	Arthropoda	Malacostraca		DECAPODA		D	Fame-u	D	Fame-u	Demersal	Nektobenthos	Uropod, Pereiopods	0.5	Schram et al., 1978	Absent	N/A				Leon				EP	Dendroidea	0	0	0	0	0	1	1	1	11	3	2	1	1	1	1	1	1	1	1	1	1	1	1
Palaeopemphia	Sepkoski, 2002	Arthropoda	Malacostraca		DECAPODA		P	Leon-u	P	Leon-u	Demersal	Nektobenthos	Uropod, Pereiopods	0.5	Glaessner, 1969	Absent	N/A		Upper Permian	Guadalupian	Guad-l	Wordian	Guadalupian			Graptoloidea	0	0	0	0	0	0	0	0	1	54	60	32	31	44	15	25	4	2	0	0	0	0	0
Protoclytiopsis	Sepkoski, 2002	Arthropoda	Malacostraca		DECAPODA		P	Dora	P	Dora	Demersal	Nektobenthos	Uropod, Pereiopods	0.5	Schram, 1980	Absent	N/A				Guad-u	Capitanian				Orthocerida	0	0	0	0	0	0	0	0	1	13	40	30	24	21	36	41	29	22	16	22	27	13	13
Anthracophausia	Sepkoski, 2002	Arthropoda	Malacostraca		EOCARIDACEA		C	Tour	C	Mosc-u	Demersal	Nektobenthos	Near-shore Facies, Pereiopods	0.75	Schram, 1981	Absent	N/A				Guad					Ostracoda	0	0	0	0	0	0	0	0	0	0	0	0	0	2	3	8	8	5	5	5	7	7	12
Devonocaris	Sepkoski, 2002	Arthropoda	Malacostraca		EOCARIDACEA		D	Give-l	D	Fame	Demersal	Nektobenthos	Near-shore Facies, Pereiopods	0.75	Schram, 1981	Absent	N/A			Tatarian	Djhu	Wuchiapingian	Lopingian			Dacryoconarida	0	0	0	0	0	0	0	0	0	0	0	0	0	1	2	3	3	6	12	9	7	8	7
Eocaris	Sepkoski, 2002	Arthropoda	Malacostraca		EOCARIDACEA		D	Give	D	Give	Demersal	Nektobenthos	Near-shore Facies, Pereiopods	0.75	Schram, 1981	Absent	N/A				Dora	Changhsingian				Homoctenida	0	0	0	0	0	0	0	0	0	0	0	0	0	0	0	0	0	0	0	0	1	1	2
Essoidea	Sepkoski, 2002	Arthropoda	Malacostraca		EOCARIDACEA		C	Mosc-u	C	Mosc-u	Demersal	Nektobenthos	Near-shore Facies, Pereiopods	0.75	Schram, 1981	Absent	N/A				Tatr
Palaemysis	Sepkoski, 2002	Arthropoda	Malacostraca		EOCARIDACEA		C	Vise	C	Bash-u	Demersal	Nektobenthos	Near-shore Facies, Pereiopods	0.75	Schram, 1981	Absent	N/A
Kellibrookia	Sepkoski, 2002	Arthropoda	Malacostraca		HOPLOSTRACA		C	Mosc-u	C	Mosc-u	Nektic	Planktonekton	Pelagic, Too Large for Plankton	0.25	Schram & Horner, 1978	Absent	N/A
Sairocaris	Sepkoski, 2002	Arthropoda	Malacostraca		HOPLOSTRACA		C	Vise-l	C	Mosc-u	Nektic	Planktonekton	Pelagic, Too Large for Plankton	0.25	Schram & Horner, 1978	Absent	N/A
Hymenocaris	Sepkoski, 2002	Arthropoda	Malacostraca		HYMENOSTRACA		Cm	Boto	O	Aren	Demersal	Nektobenthos	Poorly preserved, Three Caudal Spines Poorly Adapted for Swimming	0.25	Bowman, 1971	Absent	N/A
Hesslerella	Sepkoski, 2002	Arthropoda	Malacostraca		ISOPODA		C	Mosc-u	C	Mosc-u	Demersal	Nektobenthos	Depressiform, Uropod, Pereiopods, Extant Taxa	0.75	Hessler, 1969	Absent	N/A
Hesslerella	Sepkoski, 2002	Arthropoda	Malacostraca		ISOPODA		C	Mosc-u	C	Mosc-u	Demersal	Nektobenthos	Depressiform, Uropod, Pereiopods, Extant Taxa	0.75	Hessler, 1969	Absent	N/A
Palaeocrangon	Sepkoski, 2002	Arthropoda	Malacostraca		ISOPODA		P	Guad	P	Guad	Demersal	Nektobenthos	Depressiform, Uropod, Pereiopods, Extant Taxa	0.75	Hessler, 1969	Absent	N/A
Palaeocrangon	Sepkoski, 2002	Arthropoda	Malacostraca		ISOPODA		P	Guad	P	Guad	Demersal	Nektobenthos	Depressiform, Uropod, Pereiopods, Extant Taxa	0.75	Hessler, 1969	Absent	N/A
Palaeophreatoicus	Sepkoski, 2002	Arthropoda	Malacostraca		ISOPODA		P	Guad-u	P	Guad-u	Demersal	Nektobenthos	Depressiform, Uropod, Pereiopods, Extant Taxa	0.75	Hessler, 1969	Absent	N/A
Palaeophreatoicus	Sepkoski, 2002	Arthropoda	Malacostraca		ISOPODA		P	Guad-u	P	Guad-u	Demersal	Nektobenthos	Depressiform, Uropod, Pereiopods, Extant Taxa	0.75	Hessler, 1969	Absent	N/A
Protamphisopus	Sepkoski, 2002	Arthropoda	Malacostraca		ISOPODA		P	Guad-l	Tr	Anis	Demersal	Nektobenthos	Depressiform, Uropod, Pereiopods, Extant Taxa	0.75	Hessler, 1969	Absent	N/A
Protamphisopus	Sepkoski, 2002	Arthropoda	Malacostraca		ISOPODA		P	Guad-l	Tr	Anis	Demersal	Nektobenthos	Depressiform, Uropod, Pereiopods, Extant Taxa	0.75	Hessler, 1969	Absent	N/A
Rhabdouraea	Sepkoski, 2002	Arthropoda	Malacostraca		LEPTOSTRACA		P	Guad-l	P	Guad-l	Planktic	Nektoplankton	Small, Pelagic	0.25	Rolfe, 1969	Absent	N/A
Peachocaris	Sepkoski, 2002	Arthropoda	Malacostraca		LOPHOGASTRIDA		C	Mosc-u	C	Step-l	Planktic	Nektoplankton	comparison to Recent, small	0.75	Schram, 1984	Absent	N/A
Anthracaris	Sepkoski, 2002	Arthropoda	Malacostraca		MYSIDACEA		C	Mosc-u	C	Mosc-u	Planktic	Nektoplankton	Caridoid Facies, Extant Taxa	0.5	Hessler, 1969	Absent	N/A
Bellocaris	Sepkoski, 2002	Arthropoda	Malacostraca		MYSIDACEA		C	Vise	C	Vise	Planktic	Nektoplankton	Caridoid Facies, Extant Taxa	0.5	Hessler, 1969	Absent	N/A
Jerometichenoria	Sepkoski, 2002	Arthropoda	Malacostraca		MYSIDACEA		P	Leon-u	P	Leon-u	Planktic	Nektoplankton	Caridoid Facies, Extant Taxa	0.5	Hessler, 1969	Absent	N/A
Mamayocaris	Sepkoski, 2002	Arthropoda	Malacostraca		MYSIDACEA		C	Mosc-u	P	Leon	Planktic	Nektoplankton	Caridoid Facies, Extant Taxa	0.5	Hessler, 1969	Absent	N/A
Notocaris	Sepkoski, 2002	Arthropoda	Malacostraca		MYSIDACEA		P	Guad	P	Guad	Planktic	Nektoplankton	Caridoid Facies, Extant Taxa	0.5	Hessler, 1969	Absent	N/A
Paulocaris	Sepkoski, 2002	Arthropoda	Malacostraca		MYSIDACEA		P	Guad	P	Guad	Planktic	Nektoplankton	Caridoid Facies, Extant Taxa	0.5	Hessler, 1969	Absent	N/A
Pseudogalathea	Sepkoski, 2002	Arthropoda	Malacostraca		MYSIDACEA		C	Tour-l	C	Vise-u	Planktic	Nektoplankton	Caridoid Facies, Extant Taxa	0.5	Hessler, 1969	Absent	N/A
Pseudotealliocaris	Sepkoski, 2002	Arthropoda	Malacostraca		MYSIDACEA		C	Tour-l	C	Serp-l	Planktic	Nektoplankton	Caridoid Facies, Extant Taxa	0.5	Hessler, 1969	Absent	N/A
Pygocephalus	Sepkoski, 2002	Arthropoda	Malacostraca		MYSIDACEA		C	Bash-u	C	Step-l	Planktic	Nektoplankton	Caridoid Facies, Extant Taxa	0.5	Hessler, 1969	Absent	N/A
Archaeocaris	Sepkoski, 2002	Arthropoda	Malacostraca		PALAEOSTOMATOPODA		C	Tour-l	C	Serp-l	Demersal	Nektobenthos	Uropod, Pereiopods, Muscular Abdomen, Smaller Cephalon	0.5	Brooks, 1969	Absent	N/A
Bairdops	Sepkoski, 2002	Arthropoda	Malacostraca		PALAEOSTOMATOPODA		C	Tour-l	C	Serp-l	Demersal	Nektobenthos	Uropod, Pereiopods, Muscular Abdomen, Smaller Cephalon	0.5	Brooks, 1969; Briggs & Clarkson, 1990	Absent	N/A
Eopteridium	Sepkoski, 2002	Arthropoda	Malacostraca		PALAEOSTOMATOPODA		D	Fame	D	Fame	Demersal	Nektobenthos	Uropod, Pereiopods, Muscular Abdomen, Smaller Cephalon	0.5	Brooks, 1969	Absent	N/A
Gorgonophontes	Sepkoski, 2002	Arthropoda	Malacostraca		STOMATOPODA		C	Step-l	C	Step-l	Demersal	Nektobenthos	Depressed Abdomen, Uropod, Pereiopods	0.75	Holthuis & Manning, 1969	Absent	N/A
Perimecturus	Sepkoski, 2002	Arthropoda	Malacostraca		STOMATOPODA		C	Vise-l	C	Serp-l	Demersal	Nektobenthos	Depressed Abdomen, Uropod, Pereiopods	0.75	Holthuis & Manning, 1969	Absent	N/A
Tyrannophontes	Sepkoski, 2002	Arthropoda	Malacostraca		STOMATOPODA		C	Serp-l	C	Step-l	Demersal	Nektobenthos	Depressed Abdomen, Uropod, Pereiopods	0.75	Holthuis & Manning, 1969	Absent	N/A
Waterstonella	Sepkoski, 2002	Arthropoda	Malacostraca		WATERSTONELLIDEA		C	Vise-u	C	Vise-u	Nektic	Planktonekton	Off-shore facies; mm scale	0.75	Schram, 1981	Absent	N/A
Vachonisia	Sepkoski, 2002	Arthropoda	Marrelomorpha		ACERCOSTRACA		D	Emsi-l	D	Emsi-l	Demersal	Nektobenthos	Long Walking-Limbs, Swimming Filaments	0.75	Stürmer & Bergström, 1976; Briggs & Whittington, 1985; Kühl et al., 2009; Kühl and Rust, 2010	Absent	N/A
Apionicon	Sepkoski, 2002	Arthropoda	Marrelomorpha		CYCLINA		C	Mosc-u	C	Mosc-u	Demersal	Nektobenthos	Long Walking-Limbs, Swimming Filaments	0.75	Briggs & Whittington, 1985	Absent	N/A
Cyclus	Sepkoski, 2002	Arthropoda	Marrelomorpha		CYCLINA		C	Vise-l	P	l	Demersal	Nektobenthos	Long Walking-Limbs, Swimming Filaments	0.75	Briggs & Whittington, 1985	Absent	N/A
Halicyne	Sepkoski, 2002	Arthropoda	Marrelomorpha		CYCLINA		C	Mosc-u	Tr	Nori	Demersal	Nektobenthos	Long Walking-Limbs, Swimming Filaments	0.75	Briggs & Whittington, 1985	Absent	N/A
Hemitrochiscus	Sepkoski, 2002	Arthropoda	Marrelomorpha		CYCLINA		P	Guad	P	Guad	Demersal	Nektobenthos	Long Walking-Limbs, Swimming Filaments	0.75	Briggs & Whittington, 1985	Absent	N/A
Oonocarcinus	Sepkoski, 2002	Arthropoda	Marrelomorpha		CYCLINA		P	Leon-u	Tr	u	Demersal	Nektobenthos	Long Walking-Limbs, Swimming Filaments	0.75	Briggs & Whittington, 1985	Absent	N/A
Marrella	Sepkoski, 2002	Arthropoda	Marrelomorpha		MIMETASTERIDA		Cm	mMid-u	Cm	mMid-u	Demersal	Nektobenthos	Long Walking-Limbs, Swimming Filaments	0.75	Briggs & Whittington, 1985	Absent	N/A
Mimetaster	Sepkoski, 2002	Arthropoda	Marrelomorpha		MIMETASTERIDA		D	Emsi-l	D	Emsi-l	Demersal	Nektobenthos	Long Walking-Limbs, Swimming Filaments, Ubiquitus Encrusting Sponge Commensals, Too Heavy for Plankton, Analogous to Limulus	0.75	Stürmer & Bergström, 1976; Briggs & Whittington, 1985; Kühl et al., 2009; Kühl and Rust, 2010	Absent	N/A
Paramarria	Sepkoski, 2002	Arthropoda	Marrelomorpha		MIMETASTERIDA		O	Ashg-m	O	Ashg-m	Demersal	Nektobenthos	Long Walking-Limbs, Swimming Filaments	0.75	Briggs & Whittington, 1985	Absent	N/A
Chasmataspis	Sepkoski, 2002	Arthropoda	Merostomata		CHASMATASPIDIDA		O	Llvi	O	Llvi	Demersal	Nektobenthos	Depressiform, Large Muscular Postabdomen	0.75	Dunlop et al., 2004; Lamsdell et al., 2017	Absent	N/A
Diploaspis	Sepkoski, 2002	Arthropoda	Merostomata		CHASMATASPIDIDA		D	Emsi-l	D	Emsi-l	Demersal	Nektobenthos	Depressiform, Large Muscular Postabdomen, Swimming Legs Convergently Similar to Euypterids	0.75	Bergström, 1975; Dunlop et al., 2004; Lamsdell et al., 2017	Absent	N/A
Heteroaspis	Sepkoski, 2002	Arthropoda	Merostomata		CHASMATASPIDIDA		D	Emsi-l	D	Emsi-l	Demersal	Nektobenthos	Depressiform, Large Muscular Postabdomen	0.75	Dunlop et al., 2004; Lamsdell et al., 2017	Absent	N/A
"Hughmilleria"	Lamsdell & Selden, 2016	Arthropoda	Merostomata		EURYPTERIDA	Eurypterina	S	Ldov	S	Wenl	Demersal	Nektobenthos	Depressiform, Swimming Paddle, Comparison with Portunid Crabs	0.75	Størmer, 1955; Plotnick, 1985	Absent	Demersal
"Nanahughmilleria"	Lamsdell & Selden, 2016	Arthropoda	Merostomata		EURYPTERIDA	Eurypterina	S	Ldov	S	Wenl	Demersal	Nektobenthos	Depressiform, Swimming Paddle, Comparison with Portunid Crabs	0.75	Størmer, 1955; Plotnick, 1985	Absent	Demersal
"Parahughmillera"	Lamsdell & Selden, 2016	Arthropoda	Merostomata		EURYPTERIDA	Eurypterina	S	Ldov	S	Wenl	Demersal	Nektobenthos	Depressiform, Swimming Paddle, Comparison with Portunid Crabs	0.75	Størmer, 1955; Plotnick, 1985	Absent	Demersal
Acutiramus	Sepkoski, 2002	Arthropoda	Merostomata		EURYPTERIDA	Eurypterina	S	Prid	D	Gedi	Demersal	Nektobenthos	Depressiform, Swimming Paddle, Comparison with Portunid Crabs	0.75	Størmer, 1955; Plotnick, 1985	Present	Demersal
Adelophthalmus	Sepkoski, 2002	Arthropoda	Merostomata		EURYPTERIDA	Eurypterina	D	Fame	P	Leon	Demersal	Nektobenthos	Depressiform, Swimming Paddle, Comparison with Portunid Crabs	0.75	Størmer, 1955; Plotnick, 1985	Present	Demersal
Alkenopterus	Sepkoski, 2002	Arthropoda	Merostomata		EURYPTERIDA	Eurypterina	D	Emsi-l	D	Emsi-l	Demersal	Nektobenthos	Depressiform, Swimming Paddle, Comparison with Portunid Crabs	0.75	Størmer, 1955; Plotnick, 1985	Present	Demersal
Bassipterus	Sepkoski, 2002	Arthropoda	Merostomata		EURYPTERIDA	Eurypterina	S	Prid	S	Prid	Demersal	Nektobenthos	Depressiform, Swimming Paddle, Comparison with Portunid Crabs	0.75	Størmer, 1955; Plotnick, 1985	Present	Demersal
Buffalopterus	Sepkoski, 2002	Arthropoda	Merostomata		EURYPTERIDA	Eurypterina	S	Prid	S	Prid	Demersal	Nektobenthos	Depressiform, Swimming Paddle, Comparison with Portunid Crabs	0.75	Størmer, 1955; Plotnick, 1985	Present	Demersal
Carcinosoma	Sepkoski, 2002	Arthropoda	Merostomata		EURYPTERIDA	Eurypterina	S	Ludl	D	Emsi-l	Demersal	Nektobenthos	Depressiform, Swimming Paddle, Comparison with Portunid Crabs	0.75	Størmer, 1955; Plotnick, 1985	Present	Demersal
Carcinosoma "Clade 2"	Lamsdell & Selden, 2016	Arthropoda	Merostomata		EURYPTERIDA	Eurypterina	S	Ldov-l	S	Wenl-u	Demersal	Nektobenthos	Depressiform, Swimming Paddle, Comparison with Portunid Crabs	0.75	Størmer, 1955; Plotnick, 1985	Absent	Demersal
Ciurcopterus	Lamsdell & Selden, 2016	Arthropoda	Merostomata		EURYPTERIDA	Eurypterina	S	Prid	S	Prid	Demersal	Nektobenthos	Depressiform, Swimming Paddle, Comparison with Portunid Crabs	0.75	Størmer, 1955; Plotnick, 1985	Absent	Demersal
Clarkeipterus	Sepkoski, 2002	Arthropoda	Merostomata		EURYPTERIDA	Eurypterina	S	Prid	S	Prid	Demersal	Nektobenthos	Depressiform, Swimming Paddle, Comparison with Portunid Crabs	0.75	Størmer, 1955; Plotnick, 1985	Present	Demersal
Dolichopterus	Sepkoski, 2002	Arthropoda	Merostomata		EURYPTERIDA	Eurypterina	S	Wenl	D	Sieg-l	Demersal	Nektobenthos	Depressiform, Swimming Paddle, Comparison with Portunid Crabs	0.75	Størmer, 1955; Plotnick, 1985	Present	Demersal
Echinognathus	Sepkoski, 2002	Arthropoda	Merostomata		EURYPTERIDA	Eurypterina	O	Cara-m	O	Ashg	Demersal	Nektobenthos	Depressiform, Swimming Paddle, Comparison with Portunid Crabs	0.75	Størmer, 1955; Plotnick, 1985	Present	Demersal
Erettopterus	Sepkoski, 2002	Arthropoda	Merostomata		EURYPTERIDA	Eurypterina	S	Ldov	D	Sieg	Demersal	Nektobenthos	Depressiform, Swimming Paddle, Comparison with Portunid Crabs	0.75	Størmer, 1955; Plotnick, 1985	Present	Demersal
Erieopterus	Sepkoski, 2002	Arthropoda	Merostomata		EURYPTERIDA	Eurypterina	S	Wenl	D	Sieg-u	Demersal	Nektobenthos	Depressiform, Swimming Paddle, Comparison with Portunid Crabs	0.75	Størmer, 1955; Plotnick, 1985	Present	Demersal
Erieopterus limuloides	Lamsdell & Selden, 2016	Arthropoda	Merostomata		EURYPTERIDA	Eurypterina	S	Prid	S	Prid	Demersal	Nektobenthos	Depressiform, Swimming Paddle, Comparison with Portunid Crabs	0.75	Størmer, 1955; Plotnick, 1985	Absent	Demersal
Eurypterus	Sepkoski, 2002	Arthropoda	Merostomata		EURYPTERIDA	Eurypterina	S	Ldov	D	Emsi-l	Demersal	Nektobenthos	Depressiform, Swimming Paddle, Comparison with Portunid Crabs	0.75	Størmer, 1955; Plotnick, 1985	Present	Demersal
Eusarcana	Lamsdell & Selden, 2016	Arthropoda	Merostomata		EURYPTERIDA	Eurypterina	S	Prid	D	Gedi	Demersal	Nektobenthos	Depressiform, Swimming Paddle, Comparison with Portunid Crabs	0.75	Størmer, 1955; Plotnick, 1985	Absent	Demersal
Eysyslopterus	Lamsdell & Selden, 2016	Arthropoda	Merostomata		EURYPTERIDA	Eurypterina	S	Ludl	S	Ludl	Demersal	Nektobenthos	Depressiform, Swimming Paddle, Comparison with Portunid Crabs	0.75	Størmer, 1955; Plotnick, 1985	Absent	Demersal
Grossopterus	Sepkoski, 2002	Arthropoda	Merostomata		EURYPTERIDA	Eurypterina	D	Sieg-u	D	Sieg-u	Demersal	Nektobenthos	Depressiform, Swimming Paddle, Comparison with Portunid Crabs	0.75	Størmer, 1955; Plotnick, 1985	Present	Demersal
Herefordopterus	Lamsdell & Selden, 2016	Arthropoda	Merostomata		EURYPTERIDA	Eurypterina	S	Prid	S	Prid	Demersal	Nektobenthos	Depressiform, Swimming Paddle, Comparison with Portunid Crabs	0.75	Størmer, 1955; Plotnick, 1985	Absent	Demersal
Holmipterus	Sepkoski, 2002	Arthropoda	Merostomata		EURYPTERIDA	Eurypterina	S	Wenl	S	Wenl	Demersal	Nektobenthos	Depressiform, Swimming Paddle, Comparison with Portunid Crabs	0.75	Størmer, 1955; Plotnick, 1985	Present	Demersal
Hughmilleria	Sepkoski, 2002	Arthropoda	Merostomata		EURYPTERIDA	Eurypterina	S	Ludl	S	Ludl	Demersal	Nektobenthos	Depressiform, Swimming Paddle, Comparison with Portunid Crabs	0.75	Størmer, 1955; Plotnick, 1985	Present	Demersal
IVPP I4593	Lamsdell & Selden, 2016	Arthropoda	Merostomata		EURYPTERIDA	Eurypterina	D	Gedi	D	Gedi	Demersal	Nektobenthos	Depressiform, Swimming Paddle, Comparison with Portunid Crabs	0.75	Størmer, 1955; Plotnick, 1985	Absent	Demersal
Jaekelopterus	Sepkoski, 2002	Arthropoda	Merostomata		EURYPTERIDA	Eurypterina	D	Sieg-l	D	Emsi-l	Demersal	Nektobenthos	Depressiform, Swimming Paddle, Comparison with Portunid Crabs	0.75	Størmer, 1955; Plotnick, 1985	Present	Demersal
Lanarkopterus	Sepkoski, 2002	Arthropoda	Merostomata		EURYPTERIDA	Eurypterina	S	Wenl-u	S	Ludl-l	Demersal	Nektobenthos	Depressiform, Swimming Paddle, Comparison with Portunid Crabs	0.75	Størmer, 1955; Plotnick, 1985	Present	Demersal
Megalograptus	Sepkoski, 2002	Arthropoda	Merostomata		EURYPTERIDA	Eurypterina	O	Cara	O	Ashg-m	Demersal	Nektobenthos	Depressiform, Swimming Paddle, Comparison with Portunid Crabs	0.75	Størmer, 1955; Plotnick, 1985	Present	Demersal
Mixopterus	Sepkoski, 2002	Arthropoda	Merostomata		EURYPTERIDA	Eurypterina	S	Wenl	S	Prid	Demersal	Nektobenthos	Depressiform, Swimming Paddle, Comparison with Portunid Crabs	0.75	Størmer, 1955; Plotnick, 1985	Present	Demersal
Moselopterus	Sepkoski, 2002	Arthropoda	Merostomata		EURYPTERIDA	Eurypterina	D	Emsi-l	D	Eife	Demersal	Nektobenthos	Depressiform, Swimming Paddle, Comparison with Portunid Crabs	0.75	Størmer, 1955; Plotnick, 1985	Present	Demersal
Nanahughmilleria	Sepkoski, 2002	Arthropoda	Merostomata		EURYPTERIDA	Eurypterina	S	Ludl	D	Gedi	Demersal	Nektobenthos	Depressiform, Swimming Paddle, Comparison with Portunid Crabs	0.75	Størmer, 1955; Plotnick, 1985	Present	Demersal
Onychopterella	Sepkoski, 2002	Arthropoda	Merostomata		EURYPTERIDA	Eurypterina	S	Prid	S	Prid	Demersal	Nektobenthos	Depressiform, Swimming Paddle, Comparison with Portunid Crabs	0.75	Størmer, 1955; Plotnick, 1985	Present	Demersal
Orcanopterus	Lamsdell & Selden, 2016	Arthropoda	Merostomata		EURYPTERIDA	Eurypterina	O	Cara	O	Ashg	Demersal	Nektobenthos	Depressiform, Swimming Paddle, Comparison with Portunid Crabs	0.75	Størmer, 1955; Plotnick, 1985	Absent	Demersal
Paraeurypterus	Lamsdell & Selden, 2016	Arthropoda	Merostomata		EURYPTERIDA	Eurypterina	O	Cara	O	Ashg	Demersal	Nektobenthos	Depressiform, Swimming Paddle, Comparison with Portunid Crabs	0.75	Størmer, 1955; Plotnick, 1985	Absent	Demersal
Parahughmillera	Sepkoski, 2002	Arthropoda	Merostomata		EURYPTERIDA	Eurypterina	S	Ldov-m	D	Emsi	Demersal	Nektobenthos	Depressiform, Swimming Paddle, Comparison with Portunid Crabs	0.75	Størmer, 1955; Plotnick, 1985	Present	Demersal
Pentecopterus	Lamsdell & Selden, 2016	Arthropoda	Merostomata		EURYPTERIDA	Eurypterina	O	Llvi	O	Llvi	Demersal	Nektobenthos	Depressiform, Swimming Paddle, Comparison with Portunid Crabs	0.75	Størmer, 1955; Plotnick, 1985	Absent	Demersal
Pentlandopterus	Lamsdell & Selden, 2016	Arthropoda	Merostomata		EURYPTERIDA	Eurypterina	S	Ldov	S	Ldov	Demersal	Nektobenthos	Depressiform, Swimming Paddle, Comparison with Portunid Crabs	0.75	Størmer, 1955; Plotnick, 1985	Absent	Demersal
Pittsfordipterus	Sepkoski, 2002	Arthropoda	Merostomata		EURYPTERIDA	Eurypterina	S	Prid	S	Prid	Demersal	Nektobenthos	Depressiform, Swimming Paddle, Comparison with Portunid Crabs	0.75	Størmer, 1955; Plotnick, 1985	Present	Demersal
Pterygotus	Sepkoski, 2002	Arthropoda	Merostomata		EURYPTERIDA	Eurypterina	S	Ludl	D	Fame-m	Demersal	Nektobenthos	Depressiform, Swimming Paddle, Comparison with Portunid Crabs	0.75	Størmer, 1955; Plotnick, 1985	Present	Demersal
Rhinocarcinosoma	Sepkoski, 2002	Arthropoda	Merostomata		EURYPTERIDA	Eurypterina	S	Ludl-u	S	Ludl-u	Demersal	Nektobenthos	Depressiform, Swimming Paddle, Comparison with Portunid Crabs	0.75	Størmer, 1955; Plotnick, 1985	Present	Demersal
Ruedemannipterus	Sepkoski, 2002	Arthropoda	Merostomata		EURYPTERIDA	Eurypterina	O	Cara	S	Wenl	Demersal	Nektobenthos	Depressiform, Swimming Paddle, Comparison with Portunid Crabs	0.75	Størmer, 1955; Plotnick, 1985	Present	Demersal
Salteropterus	Sepkoski, 2002	Arthropoda	Merostomata		EURYPTERIDA	Eurypterina	S	Prid	S	Prid	Demersal	Nektobenthos	Depressiform, Swimming Paddle, Comparison with Portunid Crabs	0.75	Størmer, 1955; Plotnick, 1985	Present	Demersal
Slimonia	Sepkoski, 2002	Arthropoda	Merostomata		EURYPTERIDA	Eurypterina	S	Ldov-u	S	Prid	Demersal	Nektobenthos	Depressiform, Swimming Paddle, Comparison with Portunid Crabs	0.75	Størmer, 1955; Plotnick, 1985	Present	Demersal
Stoermeropterus	Lamsdell & Selden, 2016	Arthropoda	Merostomata		EURYPTERIDA	Eurypterina	S	Ldov-l	S	Ludl-u	Demersal	Nektobenthos	Depressiform, Swimming Paddle, Comparison with Portunid Crabs	0.75	Størmer, 1955; Plotnick, 1985	Absent	Demersal
Strobilopterus	Sepkoski, 2002	Arthropoda	Merostomata		EURYPTERIDA	Eurypterina	D	Sieg-u	D	Sieg-u	Demersal	Nektobenthos	Depressiform, Swimming Paddle, Comparison with Portunid Crabs	0.75	Størmer, 1955; Plotnick, 1985	Present	Demersal
Tylopterella	Sepkoski, 2002	Arthropoda	Merostomata		EURYPTERIDA	Eurypterina	S	Ludl	S	Ludl	Demersal	Nektobenthos	Depressiform, Swimming Paddle, Comparison with Portunid Crabs	0.75	Størmer, 1955; Plotnick, 1985	Present	Demersal
Vinetopterus	Lamsdell & Selden, 2016	Arthropoda	Merostomata		EURYPTERIDA	Eurypterina	D	Sieg	D	Emsi	Demersal	Nektobenthos	Depressiform, Swimming Paddle, Comparison with Portunid Crabs	0.75	Størmer, 1955; Plotnick, 1985	Absent	Demersal
Waeringopterus	Sepkoski, 2002	Arthropoda	Merostomata		EURYPTERIDA	Eurypterina	S	Prid	D	Gedi	Demersal	Nektobenthos	Depressiform, Swimming Paddle, Comparison with Portunid Crabs	0.75	Størmer, 1955; Plotnick, 1985	Present	Demersal
Weidopterus	Lamsdell & Selden, 2016	Arthropoda	Merostomata		EURYPTERIDA	Eurypterina	D	Emsi	D	Emsi	Demersal	Nektobenthos	Depressiform, Swimming Paddle, Comparison with Portunid Crabs	0.75	Størmer, 1955; Plotnick, 1985	Absent	Demersal
Brachopterella	Sepkoski, 2002	Arthropoda	Merostomata		EURYPTERIDA	Stylonurina	S	Prid	S	Prid	Demersal	Nektobenthos	Depressiform, Swimming Paddle, Comparison with Portunid Crabs	0.75	Størmer, 1955; Plotnick, 1985	Present	Demersal
Brachyopterus	Sepkoski, 2002	Arthropoda	Merostomata		EURYPTERIDA	Stylonurina	O	Cara-l	O	Cara-l	Demersal	Nektobenthos	Depressiform, Swimming Paddle, Comparison with Portunid Crabs	0.75	Størmer, 1955; Plotnick, 1985	Present	Demersal
Campylocephalus	Sepkoski, 2002	Arthropoda	Merostomata		EURYPTERIDA	Stylonurina	C	Serp	C	Serp	Demersal	Nektobenthos	Depressiform, Swimming Paddle, Comparison with Portunid Crabs	0.75	Størmer, 1955; Plotnick, 1985	Present	Demersal
Ctenopterus	Sepkoski, 2002	Arthropoda	Merostomata		EURYPTERIDA	Stylonurina	S	Wenl	S	Wenl	Demersal	Nektobenthos	Depressiform, Swimming Paddle, Comparison with Portunid Crabs	0.75	Størmer, 1955; Plotnick, 1985	Present	Demersal
Cyrtoctenus wittebergensis	Lamsdell & Selden, 2016	Arthropoda	Merostomata		EURYPTERIDA	Stylonurina	C	Tour	C	Tour	Demersal	Nektobenthos	Depressiform, Swimming Paddle, Comparison with Portunid Crabs	0.75	Størmer, 1955; Plotnick, 1985	Absent	Demersal
Cyrtoctenus dewalque	Lamsdell & Selden, 2016	Arthropoda	Merostomata		EURYPTERIDA	Stylonurina	D	Fame	D	Fame	Demersal	Nektobenthos	Depressiform, Swimming Paddle, Comparison with Portunid Crabs	0.75	Størmer, 1955; Plotnick, 1985	Absent	Demersal
Drepanopterus	Sepkoski, 2002	Arthropoda	Merostomata		EURYPTERIDA	Stylonurina	S	Ldov	D	Emsi-l	Demersal	Nektobenthos	Depressiform, Swimming Paddle, Comparison with Portunid Crabs	0.75	Størmer, 1955; Plotnick, 1985	Present	Demersal
Dunsopterus	Sepkoski, 2002	Arthropoda	Merostomata		EURYPTERIDA	Stylonurina	C	Vise	C	Serp	Demersal	Nektobenthos	Depressiform, Swimming Paddle, Comparison with Portunid Crabs	0.75	Størmer, 1955; Plotnick, 1985	Present	Demersal
Hallipterus	Sepkoski, 2002	Arthropoda	Merostomata		EURYPTERIDA	Stylonurina	D	Fras	D	Fras	Demersal	Nektobenthos	Depressiform, Swimming Paddle, Comparison with Portunid Crabs	0.75	Størmer, 1955; Plotnick, 1985	Present	Demersal
Hardieopterus	Sepkoski, 2002	Arthropoda	Merostomata		EURYPTERIDA	Stylonurina	S	Ldov-m	S	Prid	Demersal	Nektobenthos	Depressiform, Swimming Paddle, Comparison with Portunid Crabs	0.75	Størmer, 1955; Plotnick, 1985	Present	Demersal
Hastimima	Sepkoski, 2002	Arthropoda	Merostomata		EURYPTERIDA	Stylonurina	P	Sakm	P	Sakm	Demersal	Nektobenthos	Depressiform, Swimming Paddle, Comparison with Portunid Crabs	0.75	Størmer, 1955; Plotnick, 1985	Present	Demersal
Hibbertopterus	Sepkoski, 2002	Arthropoda	Merostomata		EURYPTERIDA	Stylonurina	C	Vise	C	Serp	Demersal	Nektobenthos	Depressiform, Swimming Paddle, Comparison with Portunid Crabs	0.75	Størmer, 1955; Plotnick, 1985	Present	Demersal
Kiaeropterus	Sepkoski, 2002	Arthropoda	Merostomata		EURYPTERIDA	Stylonurina	S	Ldov	S	Ludl	Demersal	Nektobenthos	Depressiform, Swimming Paddle, Comparison with Portunid Crabs	0.75	Størmer, 1955; Plotnick, 1985	Present	Demersal
Kokomopterus	Sepkoski, 2002	Arthropoda	Merostomata		EURYPTERIDA	Stylonurina	S	Prid	S	Prid	Demersal	Nektobenthos	Depressiform, Swimming Paddle, Comparison with Portunid Crabs	0.75	Størmer, 1955; Plotnick, 1985	Present	Demersal
Lamontopterus	Sepkoski, 2002	Arthropoda	Merostomata		EURYPTERIDA	Stylonurina	S	Ldov-u	S	Ldov-u	Demersal	Nektobenthos	Depressiform, Swimming Paddle, Comparison with Portunid Crabs	0.75	Størmer, 1955; Plotnick, 1985	Present	Demersal
Laurieopterus	Sepkoski, 2002	Arthropoda	Merostomata		EURYPTERIDA	Stylonurina	S	Ldov-u	S	Ldov-u	Demersal	Nektobenthos	Depressiform, Swimming Paddle, Comparison with Portunid Crabs	0.75	Størmer, 1955; Plotnick, 1985	Present	Demersal
Leiopterella	Lamsdell & Selden, 2016	Arthropoda	Merostomata		EURYPTERIDA	Stylonurina	D	Gedi	D	Gedi	Demersal	Nektobenthos	Depressiform, Swimming Paddle, Comparison with Portunid Crabs	0.75	Størmer, 1955; Plotnick, 1985	Absent	Demersal
Megarachne	Lamsdell & Selden, 2016	Arthropoda	Merostomata		EURYPTERIDA	Stylonurina	C	Step-l	P	Asse	Demersal	Nektobenthos	Depressiform, Swimming Paddle, Comparison with Portunid Crabs	0.75	Størmer, 1955; Plotnick, 1985	Absent	Demersal
Mycterops	Lamsdell & Selden, 2016	Arthropoda	Merostomata		EURYPTERIDA	Stylonurina	C	Bash	C	Step-l	Demersal	Nektobenthos	Depressiform, Swimming Paddle, Comparison with Portunid Crabs	0.75	Størmer, 1955; Plotnick, 1985	Absent	Demersal
Pagea	Sepkoski, 2002	Arthropoda	Merostomata		EURYPTERIDA	Stylonurina	D	Gedi-u	D	Gedi-u	Demersal	Nektobenthos	Depressiform, Swimming Paddle, Comparison with Portunid Crabs	0.75	Størmer, 1955; Plotnick, 1985	Present	Demersal
Parastylonurus	Sepkoski, 2002	Arthropoda	Merostomata		EURYPTERIDA	Stylonurina	S	Prid	S	Prid	Demersal	Nektobenthos	Depressiform, Swimming Paddle, Comparison with Portunid Crabs	0.75	Størmer, 1955; Plotnick, 1985	Present	Demersal
Rhenopterus	Sepkoski, 2002	Arthropoda	Merostomata		EURYPTERIDA	Stylonurina	D	Sieg-u	D	Fras-u	Demersal	Nektobenthos	Depressiform, Swimming Paddle, Comparison with Portunid Crabs	0.75	Størmer, 1955; Plotnick, 1985	Present	Demersal
Stylonurella	Sepkoski, 2002	Arthropoda	Merostomata		EURYPTERIDA	Stylonurina	S	Ldov	S	Ldov	Demersal	Nektobenthos	Depressiform, Swimming Paddle, Comparison with Portunid Crabs	0.75	Størmer, 1955; Plotnick, 1985	Present	Demersal
Stylonuroides	Sepkoski, 2002	Arthropoda	Merostomata		EURYPTERIDA	Stylonurina	S	Ludl	S	Ludl	Demersal	Nektobenthos	Depressiform, Swimming Paddle, Comparison with Portunid Crabs	0.75	Størmer, 1955; Plotnick, 1985	Present	Demersal
Stylonurus	Sepkoski, 2002	Arthropoda	Merostomata		EURYPTERIDA	Stylonurina	D	Gedi	D	Gedi	Demersal	Nektobenthos	Depressiform, Swimming Paddle, Comparison with Portunid Crabs	0.75	Størmer, 1955; Plotnick, 1985	Present	Demersal
Tarsopterella	Sepkoski, 2002	Arthropoda	Merostomata		EURYPTERIDA	Stylonurina	S	Prid	D	Gedi-u	Demersal	Nektobenthos	Depressiform, Swimming Paddle, Comparison with Portunid Crabs	0.75	Størmer, 1955; Plotnick, 1985	Present	Demersal
Woodwardopterus	Lamsdell & Selden, 2016	Arthropoda	Merostomata		EURYPTERIDA	Stylonurina	C	Tour	C	Tour-u	Demersal	Nektobenthos	Depressiform, Swimming Paddle, Comparison with Portunid Crabs	0.75	Størmer, 1955; Plotnick, 1985	Absent	Demersal
Baltoeurypterus	Sepkoski, 2002	Arthropoda	Merostomata		EURYPTERIDA		S	Wenl	S	Prid	Demersal	Nektobenthos	Depressiform, Swimming Paddle, Comparison with Portunid Crabs	0.75	Størmer, 1955; Plotnick, 1985	Present	Demersal
Dorfopterus	Sepkoski, 2002	Arthropoda	Merostomata		EURYPTERIDA		D	Sieg-u	D	Emsi-l	Demersal	Nektobenthos	Depressiform, Swimming Paddle, Comparison with Portunid Crabs	0.75	Størmer, 1955; Plotnick, 1985	Present	Demersal
Eocarcinosoma	Sepkoski, 2002	Arthropoda	Merostomata		EURYPTERIDA		O	Ashg	O	Ashg	Demersal	Nektobenthos	Depressiform, Swimming Paddle, Comparison with Portunid Crabs	0.75	Størmer, 1955; Plotnick, 1985	Present	Demersal
Paracarcinosoma	Sepkoski, 2002	Arthropoda	Merostomata		EURYPTERIDA		S	Wenl	D	Gedi-u	Demersal	Nektobenthos	Depressiform, Swimming Paddle, Comparison with Portunid Crabs	0.75	Størmer, 1955; Plotnick, 1985	Present	Demersal
Syntomopterus	Sepkoski, 2002	Arthropoda	Merostomata		EURYPTERIDA		D	Sieg-l	D	Sieg-l	Demersal	Nektobenthos	Depressiform, Swimming Paddle, Comparison with Portunid Crabs	0.75	Størmer, 1955; Plotnick, 1985	Present	Demersal
Truncatiramus	Sepkoski, 2002	Arthropoda	Merostomata		EURYPTERIDA		S	Wenl	S	Prid	Demersal	Nektobenthos	Depressiform, Swimming Paddle, Comparison with Portunid Crabs	0.75	Størmer, 1955; Plotnick, 1985	Present	Demersal
Willwerathia	Sepkoski, 2002	Arthropoda	Merostomata		EURYPTERIDA		D	Emsi-l	D	Emsi-l	Demersal	Nektobenthos	Depressiform, Swimming Paddle, Comparison with Portunid Crabs	0.75	Størmer, 1955; Plotnick, 1985	Present	Demersal
Eolimulus	Sepkoski, 2002	Arthropoda	Merostomata		INCERTAE SEDIS		Cm	Atda	Cm	Atda	Demersal	Nektobenthos	Comparison to Extant Xiphosurans	0.25	Bergström, 1975	Absent	N/A
Bellinuroopsis	Sepkoski, 2002	Arthropoda	Merostomata		XIPHOSURIDA		D	Fame-u	D	Fame-u	Demersal	Nektobenthos	Depressiform, Walking-Legs, Paddle-Like Abdominal Somites, Extant Taxa	1	Størmer, 1955	Absent	N/A
Bellinurus	Sepkoski, 2002	Arthropoda	Merostomata		XIPHOSURIDA		D	Eife	C	Mosc-l	Demersal	Nektobenthos	Depressiform, Walking-Legs, Paddle-Like Abdominal Somites, Extant Taxa	1	Størmer, 1955	Absent	N/A
Bunaia	Sepkoski, 2002	Arthropoda	Merostomata		XIPHOSURIDA		S	Prid	S	Prid	Demersal	Nektobenthos	Depressiform, Walking-Legs, Paddle-Like Abdominal Somites, Extant Taxa	1	Størmer, 1955	Absent	N/A
Bunodes	Sepkoski, 2002	Arthropoda	Merostomata		XIPHOSURIDA		S	Ludl-l	S	Ludl-l	Demersal	Nektobenthos	Depressiform, Walking-Legs, Paddle-Like Abdominal Somites, Extant Taxa	1	Størmer, 1955	Absent	N/A
Cyamocephalus	Sepkoski, 2002	Arthropoda	Merostomata		XIPHOSURIDA		S	Ldov-u	S	Ludl	Demersal	Nektobenthos	Depressiform, Walking-Legs, Paddle-Like Abdominal Somites, Extant Taxa	1	Størmer, 1955	Absent	N/A
Elleria	Sepkoski, 2002	Arthropoda	Merostomata		XIPHOSURIDA		D	Fras	D	Fras	Demersal	Nektobenthos	Depressiform, Walking-Legs, Paddle-Like Abdominal Somites, Extant Taxa	1	Størmer, 1955	Absent	N/A
incertae sedis	Sepkoski, 2002	Arthropoda	Merostomata		XIPHOSURIDA		S	Ldov-u	S	Ldov-u	Demersal	Nektobenthos	Depressiform, Walking-Legs, Paddle-Like Abdominal Somites, Extant Taxa	1	Størmer, 1955	Absent	N/A
Legrandella	Sepkoski, 2002	Arthropoda	Merostomata		XIPHOSURIDA		D	Emsi-l	D	Emsi-l	Demersal	Nektobenthos	Depressiform, Walking-Legs, Paddle-Like Abdominal Somites, Extant Taxa	1	Størmer, 1955	Absent	N/A
Limuloides	Sepkoski, 2002	Arthropoda	Merostomata		XIPHOSURIDA		S	Ludl-u	S	Ludl-u	Demersal	Nektobenthos	Depressiform, Walking-Legs, Paddle-Like Abdominal Somites, Extant Taxa	1	Størmer, 1955	Absent	N/A
Moravurus	Sepkoski, 2002	Arthropoda	Merostomata		XIPHOSURIDA		C	Serp-l	C	Serp-l	Demersal	Nektobenthos	Depressiform, Walking-Legs, Paddle-Like Abdominal Somites, Extant Taxa	1	Størmer, 1955	Absent	N/A
Neobelinuropsis	Sepkoski, 2002	Arthropoda	Merostomata		XIPHOSURIDA		D	Fras	D	Fras	Demersal	Nektobenthos	Depressiform, Walking-Legs, Paddle-Like Abdominal Somites, Extant Taxa	1	Størmer, 1955	Absent	N/A
Neolimulus	Sepkoski, 2002	Arthropoda	Merostomata		XIPHOSURIDA		S	Ludl	S	Ludl	Demersal	Nektobenthos	Depressiform, Walking-Legs, Paddle-Like Abdominal Somites, Extant Taxa	1	Størmer, 1955	Absent	N/A
Paleolimulus	Sepkoski, 2002	Arthropoda	Merostomata		XIPHOSURIDA		D	Fame	P	Sakm	Demersal	Nektobenthos	Depressiform, Walking-Legs, Paddle-Like Abdominal Somites, Extant Taxa	1	Størmer, 1955	Absent	N/A
Pasternakevia	Sepkoski, 2002	Arthropoda	Merostomata		XIPHOSURIDA		S	Ludl-u	S	Ludl-u	Demersal	Nektobenthos	Depressiform, Walking-Legs, Paddle-Like Abdominal Somites, Extant Taxa	1	Størmer, 1955	Absent	N/A
Pseudoniscus	Sepkoski, 2002	Arthropoda	Merostomata		XIPHOSURIDA		S	Prid	S	Prid	Demersal	Nektobenthos	Depressiform, Walking-Legs, Paddle-Like Abdominal Somites, Extant Taxa	1	Størmer, 1955	Absent	N/A
Rolfeia	Sepkoski, 2002	Arthropoda	Merostomata		XIPHOSURIDA		C	Tour-u	C	Tour-u	Demersal	Nektobenthos	Depressiform, Walking-Legs, Paddle-Like Abdominal Somites, Extant Taxa	1	Størmer, 1955	Absent	N/A
Weinbergina	Sepkoski, 2002	Arthropoda	Merostomata		XIPHOSURIDA		D	Emsi-l	D	Emsi-l	Demersal	Nektobenthos	Depressiform, Walking-Legs, Paddle-Like Abdominal Somites, Extant Taxa	1	Størmer, 1955	Absent	N/A
Ecnomocaris	Sepkoski, 2002	Arthropoda	Merostomoidea		EMERALDELLIDA		Cm	uMid-l	Cm	uMid-l	Demersal	Nektobenthos	Serial Paddle-shaped Exopods	1	Stein & Selden, 2012; Haug & Haug, 2016	Absent	N/A
Emeraldella	Sepkoski, 2002	Arthropoda	Merostomoidea		EMERALDELLIDA		Cm	mMid-u	Cm	mMid-u	Demersal	Nektobenthos	Serial Paddle-shaped Exopods	1	Stein & Selden, 2012; Haug & Haug, 2016	Absent	N/A
Thelxiope	Sepkoski, 2002	Arthropoda	Merostomoidea		EMERALDELLIDA		Cm	mMid-u	Cm	mMid-u	Demersal	Nektobenthos	Serial Paddle-shaped Exopods	1	Stein & Selden, 2012; Haug & Haug, 2016	Absent	N/A
Helmetia	Sepkoski, 2002	Arthropoda	Merostomoidea		INCERTAE SEDIS	Helmetiidae	Cm	mMid-u	Cm	mMid-u	Demersal	Nektobenthos	Dpressiform, Paddle-like Exopods	0.75	Ortega-Hernández et al., 2013; Zhao et al., 2014	Absent	N/A
Kuamaia	Sepkoski, 2002	Arthropoda	Merostomoidea		INCERTAE SEDIS	Helmetiidae	Cm	Atda-u	Cm	Atda-u	Demersal	Nektobenthos	Dpressiform, Paddle-like Exopods	0.75	Ortega-Hernández et al., 2013; Zhao et al., 2014	Absent	N/A
Fuxianhuia	Sepkoski, 2002	Arthropoda	Merostomoidea		INCERTAE SEDIS		Cm	Atda-u	Cm	Atda-u	Demersal	Nektobenthos	Serial Paddle-shaped Exopods, Walking Endopods	1	Bergström et al., 2008	Absent	N/A
Amiella	Sepkoski, 2002	Arthropoda	Merostomoidea		LIMULAVIDA		Cm	mMid-u	Cm	mMid-u	Demersal	Nektobenthos	Paddle-like Tail, Depressiform	1	Størmer, 1959; Bruton, 1981	Absent	N/A
Sidneyia	Sepkoski, 2002	Arthropoda	Merostomoidea		LIMULAVIDA		Cm	mMid-u	Cm	uMid-l	Demersal	Nektobenthos	Paddle-like Tail, Depressiform	1	Størmer, 1959; Bruton, 1981	Absent	N/A
Acanthomeridion	Sepkoski, 2002	Arthropoda	Ostracoda		BRADIORIIDA		Cm	Atda-u	Cm	Atda-u	Demersal	Nektobenthos	None Given	0.75	Horne & Siveter, 2016	Absent	N/A
Albrunnicola	Sepkoski, 2002	Arthropoda	Ostracoda		BRADIORIIDA		Cm	uMid	Cm	uMid	Demersal	Nektobenthos	None Given	0.75	Horne & Siveter, 2016	Absent	N/A
Aluta	Sepkoski, 2002	Arthropoda	Ostracoda		BRADIORIIDA		Cm	Atda-l	Cm	Tojo	Demersal	Nektobenthos	None Given	0.75	Horne & Siveter, 2016	Absent	N/A
Alutella	Sepkoski, 2002	Arthropoda	Ostracoda		BRADIORIIDA		Cm	lMid	Cm	lMid	Demersal	Nektobenthos	None Given	0.75	Horne & Siveter, 2016	Absent	N/A
Anabarochilina	Sepkoski, 2002	Arthropoda	Ostracoda		BRADIORIIDA		Cm	uMid	Cm	Dres	Demersal	Nektobenthos	None Given	0.75	Horne & Siveter, 2016	Absent	N/A
Antohipponicharion	Sepkoski, 2002	Arthropoda	Ostracoda		BRADIORIIDA		Cm	Atda-u	Cm	Atda-u	Demersal	Nektobenthos	None Given	0.75	Horne & Siveter, 2016	Absent	N/A
Aristaluta	Sepkoski, 2002	Arthropoda	Ostracoda		BRADIORIIDA		Cm	uMid-u	Cm	uMid-u	Demersal	Nektobenthos	None Given	0.75	Horne & Siveter, 2016	Absent	N/A
Auriculatella	Sepkoski, 2002	Arthropoda	Ostracoda		BRADIORIIDA		Cm	Atda-u	Cm	Atda-u	Demersal	Nektobenthos	None Given	0.75	Horne & Siveter, 2016	Absent	N/A
Australopsis	Sepkoski, 2002	Arthropoda	Ostracoda		BRADIORIIDA		Cm	mMid-u	Cm	mMid-u	Demersal	Nektobenthos	None Given	0.75	Horne & Siveter, 2016	Absent	N/A
Bajiella	Sepkoski, 2002	Arthropoda	Ostracoda		BRADIORIIDA		Cm	Atda-u	Cm	Atda-u	Demersal	Nektobenthos	None Given	0.75	Horne & Siveter, 2016	Absent	N/A
Beyrichona	Sepkoski, 2002	Arthropoda	Ostracoda		BRADIORIIDA		Cm	Atda-l	Cm	Dres	Demersal	Nektobenthos	None Given	0.75	Horne & Siveter, 2016	Absent	N/A
Biaurina	Sepkoski, 2002	Arthropoda	Ostracoda		BRADIORIIDA		Cm	mMid-u	Cm	mMid-u	Demersal	Nektobenthos	None Given	0.75	Horne & Siveter, 2016	Absent	N/A
Bradoria	Sepkoski, 2002	Arthropoda	Ostracoda		BRADIORIIDA		Cm	Atda-l	Cm	Fran	Demersal	Nektobenthos	None Given	0.75	Horne & Siveter, 2016	Absent	N/A
Bullaluta	Sepkoski, 2002	Arthropoda	Ostracoda		BRADIORIIDA		Cm	Dres-l	Cm	Dres-l	Demersal	Nektobenthos	None Given	0.75	Horne & Siveter, 2016	Absent	N/A
Cambraechmina	Sepkoski, 2002	Arthropoda	Ostracoda		BRADIORIIDA		Cm	mMid-u	Cm	mMid-u	Demersal	Nektobenthos	None Given	0.75	Horne & Siveter, 2016	Absent	N/A
Cambria	Sepkoski, 2002	Arthropoda	Ostracoda		BRADIORIIDA		Cm	Atda-l	Cm	Atda-l	Demersal	Nektobenthos	None Given	0.75	Horne & Siveter, 2016	Absent	N/A
Carnarvonia	Sepkoski, 2002	Arthropoda	Ostracoda		BRADIORIIDA		Cm	mMid-u	Cm	mMid-u	Demersal	Nektobenthos	None Given	0.75	Horne & Siveter, 2016	Absent	N/A
Cedocamia	Sepkoski, 2002	Arthropoda	Ostracoda		BRADIORIIDA		Cm	mMid-u	Cm	mMid-u	Demersal	Nektobenthos	None Given	0.75	Horne & Siveter, 2016	Absent	N/A
Changshabaella	Sepkoski, 2002	Arthropoda	Ostracoda		BRADIORIIDA		Cm	Atda-u	Cm	Atda-u	Demersal	Nektobenthos	None Given	0.75	Horne & Siveter, 2016	Absent	N/A
Combinivalvula	Sepkoski, 2002	Arthropoda	Ostracoda		BRADIORIIDA		Cm	Atda-u	Cm	Atda-u	Demersal	Nektobenthos	None Given	0.75	Horne & Siveter, 2016	Absent	N/A
Comptaluta	Sepkoski, 2002	Arthropoda	Ostracoda		BRADIORIIDA		Cm	Tojo-u	Cm	mMid	Demersal	Nektobenthos	None Given	0.75	Horne & Siveter, 2016	Absent	N/A
Dabashanella	Sepkoski, 2002	Arthropoda	Ostracoda		BRADIORIIDA		Cm	Atda-u	Cm	Atda-u	Demersal	Nektobenthos	None Given	0.75	Horne & Siveter, 2016	Absent	N/A
Dahaiella	Sepkoski, 2002	Arthropoda	Ostracoda		BRADIORIIDA		Cm	Atda-u	Cm	Atda-u	Demersal	Nektobenthos	None Given	0.75	Horne & Siveter, 2016	Absent	N/A
Damaoella	Sepkoski, 2002	Arthropoda	Ostracoda		BRADIORIIDA		Cm	lMid	Cm	lMid	Demersal	Nektobenthos	None Given	0.75	Horne & Siveter, 2016	Absent	N/A
Dielymella	Sepkoski, 2002	Arthropoda	Ostracoda		BRADIORIIDA		Cm	Atda	Cm	lMid	Demersal	Nektobenthos	None Given	0.75	Horne & Siveter, 2016	Absent	N/A
Dorispina	Sepkoski, 2002	Arthropoda	Ostracoda		BRADIORIIDA		Cm	mMid-u	Cm	mMid-u	Demersal	Nektobenthos	None Given	0.75	Horne & Siveter, 2016	Absent	N/A
Duibianella	Sepkoski, 2002	Arthropoda	Ostracoda		BRADIORIIDA		Cm	Atda-u	Cm	Atda-u	Demersal	Nektobenthos	None Given	0.75	Horne & Siveter, 2016	Absent	N/A
Epactridion	Sepkoski, 2002	Arthropoda	Ostracoda		BRADIORIIDA		Cm	Atda-u	Cm	Atda-u	Demersal	Nektobenthos	None Given	0.75	Horne & Siveter, 2016	Absent	N/A
Eremos	Sepkoski, 2002	Arthropoda	Ostracoda		BRADIORIIDA		O	Trem	O	Trem	Demersal	Nektobenthos	None Given	0.75	Horne & Siveter, 2016	Absent	N/A
Flemingopsis	Sepkoski, 2002	Arthropoda	Ostracoda		BRADIORIIDA		Cm	mMid-u	Cm	mMid-u	Demersal	Nektobenthos	None Given	0.75	Horne & Siveter, 2016	Absent	N/A
Galeopsis	Sepkoski, 2002	Arthropoda	Ostracoda		BRADIORIIDA		Cm	mMid-u	Cm	mMid-u	Demersal	Nektobenthos	None Given	0.75	Horne & Siveter, 2016	Absent	N/A
Gladioscutum	Sepkoski, 2002	Arthropoda	Ostracoda		BRADIORIIDA		Cm	uMid-m	Cm	uMid-m	Demersal	Nektobenthos	None Given	0.75	Horne & Siveter, 2016	Absent	N/A
Guangdongella	Sepkoski, 2002	Arthropoda	Ostracoda		BRADIORIIDA		Cm	lMid	Cm	mMid	Demersal	Nektobenthos	None Given	0.75	Horne & Siveter, 2016	Absent	N/A
Guangyuanella	Sepkoski, 2002	Arthropoda	Ostracoda		BRADIORIIDA		Cm	Atda	Cm	Atda	Demersal	Nektobenthos	None Given	0.75	Horne & Siveter, 2016	Absent	N/A
Hanchiangella	Sepkoski, 2002	Arthropoda	Ostracoda		BRADIORIIDA		Cm	Atda-u	Cm	Atda-u	Demersal	Nektobenthos	None Given	0.75	Horne & Siveter, 2016	Absent	N/A
Hipponicharion	Sepkoski, 2002	Arthropoda	Ostracoda		BRADIORIIDA		Cm	Atda-u	Cm	uMid	Demersal	Nektobenthos	None Given	0.75	Horne & Siveter, 2016	Absent	N/A
Houlongdongella	Sepkoski, 2002	Arthropoda	Ostracoda		BRADIORIIDA		Cm	Boto	Cm	mMid	Demersal	Nektobenthos	None Given	0.75	Horne & Siveter, 2016	Absent	N/A
Indiana	Sepkoski, 2002	Arthropoda	Ostracoda		BRADIORIIDA		Cm	Atda-u	Cm	mMid	Demersal	Nektobenthos	None Given	0.75	Horne & Siveter, 2016	Absent	N/A
Indota	Sepkoski, 2002	Arthropoda	Ostracoda		BRADIORIIDA		Cm	Boto	Cm	mMid	Demersal	Nektobenthos	None Given	0.75	Horne & Siveter, 2016	Absent	N/A
Jixinglingella	Sepkoski, 2002	Arthropoda	Ostracoda		BRADIORIIDA		Cm	Atda-u	Cm	Atda-u	Demersal	Nektobenthos	None Given	0.75	Horne & Siveter, 2016	Absent	N/A
Konicekion	Sepkoski, 2002	Arthropoda	Ostracoda		BRADIORIIDA		Cm	Atda-u	Cm	mMid	Demersal	Nektobenthos	None Given	0.75	Horne & Siveter, 2016	Absent	N/A
Kunmingella	Sepkoski, 2002	Arthropoda	Ostracoda		BRADIORIIDA		Cm	Atda-u	Cm	Atda-u	Demersal	Nektobenthos	None Given	0.75	Horne & Siveter, 2016	Absent	N/A
Kunyangella	Sepkoski, 2002	Arthropoda	Ostracoda		BRADIORIIDA		Cm	Atda-u	Cm	Atda-u	Demersal	Nektobenthos	None Given	0.75	Horne & Siveter, 2016	Absent	N/A
Leshanella	Sepkoski, 2002	Arthropoda	Ostracoda		BRADIORIIDA		Cm	Atda-u	Cm	Atda-u	Demersal	Nektobenthos	None Given	0.75	Horne & Siveter, 2016	Absent	N/A
Liagnshanella	Sepkoski, 2002	Arthropoda	Ostracoda		BRADIORIIDA		Cm	Atda-u	Cm	Atda-u	Demersal	Nektobenthos	None Given	0.75	Horne & Siveter, 2016	Absent	N/A
Ludvigsenites	Sepkoski, 2002	Arthropoda	Ostracoda		BRADIORIIDA		O	m	S	Wenl	Demersal	Nektobenthos	None Given	0.75	Horne & Siveter, 2016	Absent	N/A
Malongella	Sepkoski, 2002	Arthropoda	Ostracoda		BRADIORIIDA		Cm	Atda	Cm	Atda	Demersal	Nektobenthos	None Given	0.75	Horne & Siveter, 2016	Absent	N/A
Mannosocmia	Sepkoski, 2002	Arthropoda	Ostracoda		BRADIORIIDA		Cm	lMid	Cm	mMid	Demersal	Nektobenthos	None Given	0.75	Horne & Siveter, 2016	Absent	N/A
Meishucunella	Sepkoski, 2002	Arthropoda	Ostracoda		BRADIORIIDA		Cm	Atda-u	Cm	Atda-u	Demersal	Nektobenthos	None Given	0.75	Horne & Siveter, 2016	Absent	N/A
Mononotella	Sepkoski, 2002	Arthropoda	Ostracoda		BRADIORIIDA		Cm	Atda-u	Cm	mMid	Demersal	Nektobenthos	None Given	0.75	Horne & Siveter, 2016	Absent	N/A
Nanchengella	Sepkoski, 2002	Arthropoda	Ostracoda		BRADIORIIDA		Cm	Atda-u	Cm	Atda-u	Demersal	Nektobenthos	None Given	0.75	Horne & Siveter, 2016	Absent	N/A
Neokunmingella	Sepkoski, 2002	Arthropoda	Ostracoda		BRADIORIIDA		Cm	Boto	Cm	Boto	Demersal	Nektobenthos	None Given	0.75	Horne & Siveter, 2016	Absent	N/A
Ophiosema	Sepkoski, 2002	Arthropoda	Ostracoda		BRADIORIIDA		Cm	Tojo-u	Cm	mMid	Demersal	Nektobenthos	None Given	0.75	Horne & Siveter, 2016	Absent	N/A
Ovaluta	Sepkoski, 2002	Arthropoda	Ostracoda		BRADIORIIDA		Cm	Boto	Cm	Boto	Demersal	Nektobenthos	None Given	0.75	Horne & Siveter, 2016	Absent	N/A
Parakunmingella	Sepkoski, 2002	Arthropoda	Ostracoda		BRADIORIIDA		Cm	Atda	Cm	Atda	Demersal	Nektobenthos	None Given	0.75	Horne & Siveter, 2016	Absent	N/A
Bertillonella	Sepkoski, 2002	Arthropoda	Ostracoda		MYODOCOPIDA		D	Give-l	C	Tour-l	Planktic	Euplankton	Natatorial Antennae, Extant Taxa	0.75	Benson et al., 1961	Absent	N/A
Bisulcoentomozoe	Sepkoski, 2002	Arthropoda	Ostracoda		MYODOCOPIDA		D	Eife-l	D	Eife-u	Planktic	Euplankton	Natatorial Antennae, Extant Taxa	0.75	Benson et al., 1961	Absent	N/A
Bolbozoe	Sepkoski, 2002	Arthropoda	Ostracoda		MYODOCOPIDA		S	Ldov-u	D	Fame	Planktic	Euplankton	Natatorial Antennae, Extant Taxa	0.75	Benson et al., 1961	Absent	N/A
Boucia	Sepkoski, 2002	Arthropoda	Ostracoda		MYODOCOPIDA		S	Ludl	S	Prid	Planktic	Euplankton	Natatorial Antennae, Extant Taxa	0.75	Benson et al., 1961	Absent	N/A
Cyprella	Sepkoski, 2002	Arthropoda	Ostracoda		MYODOCOPIDA		C	Vise	P	l	Planktic	Euplankton	Natatorial Antennae, Extant Taxa	0.75	Benson et al., 1961	Absent	N/A
Cypridella	Sepkoski, 2002	Arthropoda	Ostracoda		MYODOCOPIDA		D	Fras-u	P	l	Planktic	Euplankton	Natatorial Antennae, Extant Taxa	0.75	Benson et al., 1961	Absent	N/A
Cypridellina	Sepkoski, 2002	Arthropoda	Ostracoda		MYODOCOPIDA		D	Fame	C	Vise	Planktic	Euplankton	Natatorial Antennae, Extant Taxa	0.75	Benson et al., 1961	Absent	N/A
Cypridinella	Sepkoski, 2002	Arthropoda	Ostracoda		MYODOCOPIDA		D	Fame	C	Vise	Planktic	Euplankton	Natatorial Antennae, Extant Taxa	0.75	Benson et al., 1961	Absent	N/A
Cyprosina	Sepkoski, 2002	Arthropoda	Ostracoda		MYODOCOPIDA		S	Prid	D	Give	Planktic	Euplankton	Natatorial Antennae, Extant Taxa	0.75	Benson et al., 1961	Absent	N/A
Discoidella	Sepkoski, 2002	Arthropoda	Ostracoda		MYODOCOPIDA		C	Tour-l	P	Dora	Planktic	Euplankton	Natatorial Antennae, Extant Taxa	0.75	Benson et al., 1961	Absent	N/A
Elpezoe	Sepkoski, 2002	Arthropoda	Ostracoda		MYODOCOPIDA		S	Wenl-l	P	Asse	Planktic	Euplankton	Natatorial Antennae, Extant Taxa	0.75	Benson et al., 1961	Absent	N/A
Entomoprimitia	Sepkoski, 2002	Arthropoda	Ostracoda		MYODOCOPIDA		D	Fras-l	C	Tour-u	Planktic	Euplankton	Natatorial Antennae, Extant Taxa	0.75	Benson et al., 1961	Absent	N/A
Entomozoe	Sepkoski, 2002	Arthropoda	Ostracoda		MYODOCOPIDA		S	Ldov-u	P	Asse	Planktic	Euplankton	Natatorial Antennae, Extant Taxa	0.75	Benson et al., 1961	Absent	N/A
Fossirichterina	Sepkoski, 2002	Arthropoda	Ostracoda		MYODOCOPIDA		D	Fame-m	D	Fame-u	Planktic	Euplankton	Natatorial Antennae, Extant Taxa	0.75	Benson et al., 1961	Absent	N/A
Franklinella	Sepkoski, 2002	Arthropoda	Ostracoda		MYODOCOPIDA		C	Tour-u	C	Vise-l	Planktic	Euplankton	Natatorial Antennae, Extant Taxa	0.75	Benson et al., 1961	Absent	N/A
Kuzminaella	Sepkoski, 2002	Arthropoda	Ostracoda		MYODOCOPIDA		D	Fame-u	C	Tour-l	Planktic	Euplankton	Natatorial Antennae, Extant Taxa	0.75	Benson et al., 1961	Absent	N/A
Maternella	Sepkoski, 2002	Arthropoda	Ostracoda		MYODOCOPIDA		D	Fame-m	C	Serp-l	Planktic	Euplankton	Natatorial Antennae, Extant Taxa	0.75	Benson et al., 1961	Absent	N/A
Nehdentomis	Sepkoski, 2002	Arthropoda	Ostracoda		MYODOCOPIDA		D	Fras-l	D	Fame-u	Planktic	Euplankton	Natatorial Antennae, Extant Taxa	0.75	Benson et al., 1961	Absent	N/A
Palaeophilomedes	Sepkoski, 2002	Arthropoda	Ostracoda		MYODOCOPIDA		D	Fras	C	Tour	Planktic	Euplankton	Natatorial Antennae, Extant Taxa	0.75	Benson et al., 1961	Absent	N/A
Paraungerella	Sepkoski, 2002	Arthropoda	Ostracoda		MYODOCOPIDA		D	Fame-l	D	Fame-l	Planktic	Euplankton	Natatorial Antennae, Extant Taxa	0.75	Benson et al., 1961	Absent	N/A
Permopolycope	Sepkoski, 2002	Arthropoda	Ostracoda		MYODOCOPIDA		P	Djhu	P	Djhu	Planktic	Euplankton	Natatorial Antennae, Extant Taxa	0.75	Benson et al., 1961	Absent	N/A
Pseudoentomozoe	Sepkoski, 2002	Arthropoda	Ostracoda		MYODOCOPIDA		S	Ludl-l	S	Ludl-l	Planktic	Euplankton	Natatorial Antennae, Extant Taxa	0.75	Benson et al., 1961	Absent	N/A
Rabienella	Sepkoski, 2002	Arthropoda	Ostracoda		MYODOCOPIDA		D	Fras-u	D	Fras-u	Planktic	Euplankton	Natatorial Antennae, Extant Taxa	0.75	Benson et al., 1961	Absent	N/A
Rabienites	Sepkoski, 2002	Arthropoda	Ostracoda		MYODOCOPIDA		D	Fame-l	D	Fame-u	Planktic	Euplankton	Natatorial Antennae, Extant Taxa	0.75	Benson et al., 1961	Absent	N/A
Rhombina	Sepkoski, 2002	Arthropoda	Ostracoda		MYODOCOPIDA		C	Vise	C	Vise	Planktic	Euplankton	Natatorial Antennae, Extant Taxa	0.75	Benson et al., 1961	Absent	N/A
Rhomboentomozoe	Sepkoski, 2002	Arthropoda	Ostracoda		MYODOCOPIDA		S	Ludl-l	S	Prid	Planktic	Euplankton	Natatorial Antennae, Extant Taxa	0.75	Benson et al., 1961	Absent	N/A
Richteria	Sepkoski, 2002	Arthropoda	Ostracoda		MYODOCOPIDA		S	Ludl-l	C	Tour-l	Planktic	Euplankton	Natatorial Antennae, Extant Taxa	0.75	Benson et al., 1961	Absent	N/A
Richterina	Sepkoski, 2002	Arthropoda	Ostracoda		MYODOCOPIDA		D	Fame-m	C	Vise-u	Planktic	Euplankton	Natatorial Antennae, Extant Taxa	0.75	Benson et al., 1961	Absent	N/A
Steinachella	Sepkoski, 2002	Arthropoda	Ostracoda		MYODOCOPIDA		C	Tour	C	Serp-l	Planktic	Euplankton	Natatorial Antennae, Extant Taxa	0.75	Benson et al., 1961	Absent	N/A
Sulcuna	Sepkoski, 2002	Arthropoda	Ostracoda		MYODOCOPIDA		C	Vise	C	Vise	Planktic	Euplankton	Natatorial Antennae, Extant Taxa	0.75	Benson et al., 1961	Absent	N/A
Thaumatomma	Sepkoski, 2002	Arthropoda	Ostracoda		MYODOCOPIDA		P	Guad	P	Guad	Planktic	Euplankton	Natatorial Antennae, Extant Taxa	0.75	Benson et al., 1961	Absent	N/A
Truyolsina	Sepkoski, 2002	Arthropoda	Ostracoda		MYODOCOPIDA		C	Serp-l	C	Serp-l	Planktic	Euplankton	Natatorial Antennae, Extant Taxa	0.75	Benson et al., 1961	Absent	N/A
Ungerella	Sepkoski, 2002	Arthropoda	Ostracoda		MYODOCOPIDA		D	Eife-u	C	Vise-l	Planktic	Euplankton	Natatorial Antennae, Extant Taxa	0.75	Benson et al., 1961	Absent	N/A
Vltavina	Sepkoski, 2002	Arthropoda	Ostracoda		MYODOCOPIDA		S	Ludl-l	S	Prid	Planktic	Euplankton	Natatorial Antennae, Extant Taxa	0.75	Benson et al., 1961	Absent	N/A
Volkina	Sepkoski, 2002	Arthropoda	Ostracoda		MYODOCOPIDA		D	Fras-l	D	Fame-m	Planktic	Euplankton	Natatorial Antennae, Extant Taxa	0.75	Benson et al., 1961	Absent	N/A
Aechmina	Sepkoski, 2002	Arthropoda	Ostracoda		PALAEOCOPIDA	Aechminidae	O	Aren	D	Fame-u	Demersal	Nektobenthos	None Given	0.75	Horne & Siveter, 2016	Absent	N/A
Paraechmina	Sepkoski, 2002	Arthropoda	Ostracoda		PALAEOCOPIDA	Aechminidae	S	Wenl	D	l	Demersal	Nektobenthos	None Given	0.75	Horne & Siveter, 2016	Absent	N/A
Falites	Sepkoski, 2002	Arthropoda	Ostracoda		PHOSPHATOCOPDA		Cm	Dres-l	Cm	Fran-u	Demersal	Nektobenthos	None Given	0.75	Horne & Siveter, 2016	Absent	N/A
Flemingia	Sepkoski, 2002	Arthropoda	Ostracoda		PHOSPHATOCOPDA		Cm	mMid-u	Cm	mMid-u	Demersal	Nektobenthos	None Given	0.75	Horne & Siveter, 2016	Absent	N/A
Hesslandona	Sepkoski, 2002	Arthropoda	Ostracoda		PHOSPHATOCOPDA		Cm	Boto	Cm	Dres-l	Demersal	Nektobenthos	None Given	0.75	Horne & Siveter, 2016	Absent	N/A
Monasterium	Sepkoski, 2002	Arthropoda	Ostracoda		PHOSPHATOCOPDA		Cm	Boto	Cm	mMid-u	Demersal	Nektobenthos	None Given	0.75	Horne & Siveter, 2016	Absent	N/A
Oepikaluta	Sepkoski, 2002	Arthropoda	Ostracoda		PHOSPHATOCOPDA		Cm	uMid-m	Cm	uMid-m	Demersal	Nektobenthos	None Given	0.75	Horne & Siveter, 2016	Absent	N/A
Vestrogothia	Sepkoski, 2002	Arthropoda	Ostracoda		PHOSPHATOCOPDA		Cm	Tojo	Cm	Dres	Demersal	Nektobenthos	None Given	0.75	Horne & Siveter, 2016	Absent	N/A
Zepaera	Sepkoski, 2002	Arthropoda	Ostracoda		PHOSPHATOCOPDA		Cm	Atda-u	Cm	mMid-u	Demersal	Nektobenthos	None Given	0.75	Horne & Siveter, 2016	Absent	N/A
Haworthina	Sepkoski, 2002	Arthropoda	Ostracoda		PODOCOPIDA	Pontocyprididae	C	Mosc-u	P	Dora	Demersal	Nektobenthos	None Given, Extant Taxa	0.75	Horne & Siveter, 2016	Absent	N/A
Cryptocaris	Sepkoski, 2002	Arthropoda	Remipedia		Enantiopoda		C	Mosc-u	C	Mosc-u	Planktic	Nektoplankton	Small	0.5	Schram, 1981	Absent	N/A
Tesnusocaris	Sepkoski, 2002	Arthropoda	Remipedia		Enantiopoda		C	Serp-l	C	Serp-l	Planktic	Nektoplankton	Small (77 mm TL), Paddles	0.5	Brooks, 1955	Absent	N/A
Concavicaris	Sepkoski, 2002	Arthropoda	Thylacocephala		CONCAVICARIDA		D	Emsi-u	C	Step-l	Nektic	Planktonekton	Streamlined Carapace, Large Panoramic Acute Eyes, Raptorial Appendages, Swimming Pleopods Likely too Weak for Eunektic Swimming, Comparison to Extant Hyperiidae	0.5	Rolfe, 1985; Vannier et al., 2006; Broda et al., 2015	Absent	N/A
Harrycaris	Sepkoski, 2002	Arthropoda	Thylacocephala		CONCAVICARIDA		D	Fras-l	D	Fras-l	Nektic	Planktonekton	Streamlined Carapace, Large Panoramic Acute Eyes, Raptorial Appendages, Swimming Pleopods Likely too Weak for Eunektic Swimming, Comparison to Extant Hyperiidae	0.5	Rolfe, 1985; Vannier et al., 2006; Broda et al., 2015	Absent	N/A
incertae sedis	Sepkoski, 2002	Arthropoda	Thylacocephala		CONCAVICARIDA		S	Ldov-u	S	Ldov-u	Nektic	Planktonekton	Streamlined Carapace, Large Panoramic Acute Eyes, Raptorial Appendages, Swimming Pleopods Likely too Weak for Eunektic Swimming, Comparison to Extant Hyperiidae	0.5	Rolfe, 1985; Vannier et al., 2006; Broda et al., 2015	Absent	N/A
Convexicaris	Sepkoski, 2002	Arthropoda	Thylacocephala		CONCHYLIOCARIDA		C	Mosc-u	C	Mosc-u	Nektic	Planktonekton	Streamlined Carapace, Large Panoramic Acute Eyes, Raptorial Appendages, Swimming Pleopods Likely too Weak for Eunektic Swimming, Comparison to Extant Hyperiidae	0.5	Rolfe, 1985; Vannier et al., 2006; Broda et al., 2015	Absent	N/A
Dioxycaris	Sepkoski, 2002	Arthropoda	Thylacocephala		INCERTAE SEDIS		Cm	Boto	Cm	uMid-l	Nektic	Planktonekton	Streamlined Carapace, Large Panoramic Acute Eyes, Raptorial Appendages, Swimming Pleopods Likely too Weak for Eunektic Swimming, Comparison to Extant Hyperiidae	0.5	Rolfe, 1985; Vannier et al., 2006; Broda et al., 2015	Absent	N/A
Galenocaris	Sepkoski, 2002	Arthropoda	Thylacocephala		INCERTAE SEDIS		O	Ashg-m	O	Ashg-m	Nektic	Planktonekton	Streamlined Carapace, Large Panoramic Acute Eyes, Raptorial Appendages, Swimming Pleopods Likely too Weak for Eunektic Swimming, Comparison to Extant Hyperiidae	0.5	Rolfe, 1985; Vannier et al., 2006; Broda et al., 2015	Absent	N/A
Nothozoe	Sepkoski, 2002	Arthropoda	Thylacocephala		INCERTAE SEDIS		Cm	Boto	O	Cara-l	Nektic	Planktonekton	Streamlined Carapace, Large Panoramic Acute Eyes, Raptorial Appendages, Swimming Pleopods Likely too Weak for Eunektic Swimming, Comparison to Extant Hyperiidae	0.5	Rolfe, 1985; Vannier et al., 2006; Broda et al., 2015	Absent	N/A
Saccocaris	Sepkoski, 2002	Arthropoda	Thylacocephala		INCERTAE SEDIS		Cm	u	O	l	Nektic	Planktonekton	Streamlined Carapace, Large Panoramic Acute Eyes, Raptorial Appendages, Swimming Pleopods Likely too Weak for Eunektic Swimming, Comparison to Extant Hyperiidae	0.5	Rolfe, 1985; Vannier et al., 2006; Broda et al., 2015	Absent	N/A
Tuzoia	Sepkoski, 2002	Arthropoda	Thylacocephala		INCERTAE SEDIS		Cm	Atda-u	Cm	mMid-m	Nektic	Planktonekton	Streamlined Carapace, Large Panoramic Acute Eyes, Raptorial Appendages, Swimming Pleopods Likely too Weak for Eunektic Swimming, Comparison to Extant Hyperiidae	0.5	Rolfe, 1985; Vannier et al., 2006; Broda et al., 2015	Absent	N/A
Abakolia	Sepkoski, 2002	Arthropoda	Trilobita		AGNOSTIDA		Cm	Boto	Cm	lMid	Motile Benthic	Motile Benthos	No Plausible Swimming Mode, Blind, Depressiform	0.5	Harrington et al., 1959; Fortey & Owens, 1999	Absent	N/A
Acadagnostus	Sepkoski, 2002	Arthropoda	Trilobita		AGNOSTIDA		Cm	mMid-u	Cm	uMid-u	Motile Benthic	Motile Benthos	No Plausible Swimming Mode, Blind, Depressiform	0.5	Harrington et al., 1959; Fortey & Owens, 1999	Absent	N/A
Acidiscus	Sepkoski, 2002	Arthropoda	Trilobita		AGNOSTIDA		Cm	Boto	Cm	Boto	Motile Benthic	Motile Benthos	No Plausible Swimming Mode, Blind, Depressiform	0.5	Harrington et al., 1959; Fortey & Owens, 1999	Absent	N/A
Acidusus	Sepkoski, 2002	Arthropoda	Trilobita		AGNOSTIDA		Cm	uMid-l	Cm	uMid-u	Motile Benthic	Motile Benthos	No Plausible Swimming Mode, Blind, Depressiform	0.5	Harrington et al., 1959; Fortey & Owens, 1999	Absent	N/A
Acimetopus	Sepkoski, 2002	Arthropoda	Trilobita		AGNOSTIDA		Cm	Boto	Cm	Boto	Motile Benthic	Motile Benthos	No Plausible Swimming Mode, Blind, Depressiform	0.5	Harrington et al., 1959; Fortey & Owens, 1999	Absent	N/A
Acmarhachis	Sepkoski, 2002	Arthropoda	Trilobita		AGNOSTIDA		Cm	Dres-l	Cm	Fran-u	Motile Benthic	Motile Benthos	No Plausible Swimming Mode, Blind, Depressiform	0.5	Harrington et al., 1959; Fortey & Owens, 1999	Absent	N/A
Acutatognostus	Sepkoski, 2002	Arthropoda	Trilobita		AGNOSTIDA		Cm	Dres-u	Cm	Dres-u	Motile Benthic	Motile Benthos	No Plausible Swimming Mode, Blind, Depressiform	0.5	Harrington et al., 1959; Fortey & Owens, 1999	Absent	N/A
Agnostaridis	Sepkoski, 2002	Arthropoda	Trilobita		AGNOSTIDA		Cm	uMid-u	Cm	Dres-l	Motile Benthic	Motile Benthos	No Plausible Swimming Mode, Blind, Depressiform	0.5	Harrington et al., 1959; Fortey & Owens, 1999	Absent	N/A
Agnostogonus	Sepkoski, 2002	Arthropoda	Trilobita		AGNOSTIDA		Cm	Dres-l	Cm	Dres-l	Motile Benthic	Motile Benthos	No Plausible Swimming Mode, Blind, Depressiform	0.5	Harrington et al., 1959; Fortey & Owens, 1999	Absent	N/A
Agnostotes	Sepkoski, 2002	Arthropoda	Trilobita		AGNOSTIDA		Cm	Fran-l	Cm	Fran-u	Motile Benthic	Motile Benthos	No Plausible Swimming Mode, Blind, Depressiform	0.5	Harrington et al., 1959; Fortey & Owens, 1999	Absent	N/A
Agnostus	Sepkoski, 2002	Arthropoda	Trilobita		AGNOSTIDA		Cm	uMid-l	Cm	Dres-l	Motile Benthic	Motile Benthos	No Plausible Swimming Mode, Blind, Depressiform	0.5	Harrington et al., 1959; Fortey & Owens, 1999	Absent	N/A
Aistagnostus	Sepkoski, 2002	Arthropoda	Trilobita		AGNOSTIDA		Cm	Fran	Cm	Fran	Motile Benthic	Motile Benthos	No Plausible Swimming Mode, Blind, Depressiform	0.5	Harrington et al., 1959; Fortey & Owens, 1999	Absent	N/A
Allobodochus	Sepkoski, 2002	Arthropoda	Trilobita		AGNOSTIDA		Cm	uMid-u	Cm	uMid-u	Motile Benthic	Motile Benthos	No Plausible Swimming Mode, Blind, Depressiform	0.5	Harrington et al., 1959; Fortey & Owens, 1999	Absent	N/A
Ammagnostus	Sepkoski, 2002	Arthropoda	Trilobita		AGNOSTIDA		Cm	uMid-u	Cm	Dres-l	Motile Benthic	Motile Benthos	No Plausible Swimming Mode, Blind, Depressiform	0.5	Harrington et al., 1959; Fortey & Owens, 1999	Absent	N/A
Analox	Sepkoski, 2002	Arthropoda	Trilobita		AGNOSTIDA		Cm	Boto	Cm	Boto	Motile Benthic	Motile Benthos	No Plausible Swimming Mode, Blind, Depressiform	0.5	Harrington et al., 1959; Fortey & Owens, 1999	Absent	N/A
Anglagnostus	Sepkoski, 2002	Arthropoda	Trilobita		AGNOSTIDA		O	Trem-l	O	Trem-l	Motile Benthic	Motile Benthos	No Plausible Swimming Mode, Blind, Depressiform	0.5	Harrington et al., 1959; Fortey & Owens, 1999	Absent	N/A
Aotagnostus	Sepkoski, 2002	Arthropoda	Trilobita		AGNOSTIDA		Cm	uMid-m	Cm	uMid-u	Motile Benthic	Motile Benthos	No Plausible Swimming Mode, Blind, Depressiform	0.5	Harrington et al., 1959; Fortey & Owens, 1999	Absent	N/A
Archaeagnostus	Sepkoski, 2002	Arthropoda	Trilobita		AGNOSTIDA		Cm	Boto	Cm	Boto	Motile Benthic	Motile Benthos	No Plausible Swimming Mode, Blind, Depressiform	0.5	Harrington et al., 1959; Fortey & Owens, 1999	Absent	N/A
Armagnostus	Sepkoski, 2002	Arthropoda	Trilobita		AGNOSTIDA		Cm	uMid	Cm	uMid	Motile Benthic	Motile Benthos	No Plausible Swimming Mode, Blind, Depressiform	0.5	Harrington et al., 1959; Fortey & Owens, 1999	Absent	N/A
Arthrorhachis	Sepkoski, 2002	Arthropoda	Trilobita		AGNOSTIDA		O	Trem-u	O	Ashg-u	Motile Benthic	Motile Benthos	No Plausible Swimming Mode, Blind, Depressiform	0.5	Harrington et al., 1959; Fortey & Owens, 1999	Absent	N/A
Aspidagnostus	Sepkoski, 2002	Arthropoda	Trilobita		AGNOSTIDA		Cm	Dres-l	Cm	Dres-u	Motile Benthic	Motile Benthos	No Plausible Swimming Mode, Blind, Depressiform	0.5	Harrington et al., 1959; Fortey & Owens, 1999	Absent	N/A
Baltagnostus	Sepkoski, 2002	Arthropoda	Trilobita		AGNOSTIDA		Cm	mMid-u	Cm	uMid-u	Motile Benthic	Motile Benthos	No Plausible Swimming Mode, Blind, Depressiform	0.5	Harrington et al., 1959; Fortey & Owens, 1999	Absent	N/A
Bathydiscus	Sepkoski, 2002	Arthropoda	Trilobita		AGNOSTIDA		Cm	Boto	Cm	Boto	Motile Benthic	Motile Benthos	No Plausible Swimming Mode, Blind, Depressiform	0.5	Harrington et al., 1959; Fortey & Owens, 1999	Absent	N/A
Blystagnostus	Sepkoski, 2002	Arthropoda	Trilobita		AGNOSTIDA		Cm	uMid-u	Cm	uMid-u	Motile Benthic	Motile Benthos	No Plausible Swimming Mode, Blind, Depressiform	0.5	Harrington et al., 1959; Fortey & Owens, 1999	Absent	N/A
Bolboparia	Sepkoski, 2002	Arthropoda	Trilobita		AGNOSTIDA		Cm	Boto	Cm	Boto	Motile Benthic	Motile Benthos	No Plausible Swimming Mode, Blind, Depressiform	0.5	Harrington et al., 1959; Fortey & Owens, 1999	Absent	N/A
Calodiscus	Sepkoski, 2002	Arthropoda	Trilobita		AGNOSTIDA		Cm	Atda-u	Cm	Boto-l	Motile Benthic	Motile Benthos	No Plausible Swimming Mode, Blind, Depressiform	0.5	Harrington et al., 1959; Fortey & Owens, 1999	Absent	N/A
Cephalopyge	Sepkoski, 2002	Arthropoda	Trilobita		AGNOSTIDA		Cm	Atda-l	Cm	Atda-l	Motile Benthic	Motile Benthos	No Plausible Swimming Mode, Blind, Depressiform	0.5	Harrington et al., 1959; Fortey & Owens, 1999	Absent	N/A
Ceragnostus	Sepkoski, 2002	Arthropoda	Trilobita		AGNOSTIDA		Cm	Trep-l	Cm	Trep-l	Motile Benthic	Motile Benthos	No Plausible Swimming Mode, Blind, Depressiform	0.5	Harrington et al., 1959; Fortey & Owens, 1999	Absent	N/A
Chatkalgnostus	Sepkoski, 2002	Arthropoda	Trilobita		AGNOSTIDA		O	Llvi-l	O	Llde-l	Motile Benthic	Motile Benthos	No Plausible Swimming Mode, Blind, Depressiform	0.5	Harrington et al., 1959; Fortey & Owens, 1999	Absent	N/A
Chelediscus	Sepkoski, 2002	Arthropoda	Trilobita		AGNOSTIDA		Cm	Boto-u	Cm	Boto-u	Motile Benthic	Motile Benthos	No Plausible Swimming Mode, Blind, Depressiform	0.5	Harrington et al., 1959; Fortey & Owens, 1999	Absent	N/A
Ciceragnostus	Sepkoski, 2002	Arthropoda	Trilobita		AGNOSTIDA		O	Trem-u	O	Trem-u	Motile Benthic	Motile Benthos	No Plausible Swimming Mode, Blind, Depressiform	0.5	Harrington et al., 1959; Fortey & Owens, 1999	Absent	N/A
Clavagnostus	Sepkoski, 2002	Arthropoda	Trilobita		AGNOSTIDA		Cm	uMid-u	Cm	Dres-l	Motile Benthic	Motile Benthos	No Plausible Swimming Mode, Blind, Depressiform	0.5	Harrington et al., 1959; Fortey & Owens, 1999	Absent	N/A
Cobboldites	Sepkoski, 2002	Arthropoda	Trilobita		AGNOSTIDA		Cm	Boto	Cm	Boto	Motile Benthic	Motile Benthos	No Plausible Swimming Mode, Blind, Depressiform	0.5	Harrington et al., 1959; Fortey & Owens, 1999	Absent	N/A
Condylopyge	Sepkoski, 2002	Arthropoda	Trilobita		AGNOSTIDA		Cm	Tojo	Cm	uMid-m	Motile Benthic	Motile Benthos	No Plausible Swimming Mode, Blind, Depressiform	0.5	Harrington et al., 1959; Fortey & Owens, 1999	Absent	N/A
Connagnostus	Sepkoski, 2002	Arthropoda	Trilobita		AGNOSTIDA		Cm	Dres-l	Cm	Dres-l	Motile Benthic	Motile Benthos	No Plausible Swimming Mode, Blind, Depressiform	0.5	Harrington et al., 1959; Fortey & Owens, 1999	Absent	N/A
Corrugatagnostus	Sepkoski, 2002	Arthropoda	Trilobita		AGNOSTIDA		O	Trem-l	O	Ashg-m	Motile Benthic	Motile Benthos	No Plausible Swimming Mode, Blind, Depressiform	0.5	Harrington et al., 1959; Fortey & Owens, 1999	Absent	N/A
Cotaglagnostus	Sepkoski, 2002	Arthropoda	Trilobita		AGNOSTIDA		Cm	uMid-l	Cm	uMid-u	Motile Benthic	Motile Benthos	No Plausible Swimming Mode, Blind, Depressiform	0.5	Harrington et al., 1959; Fortey & Owens, 1999	Absent	N/A
Criotypus	Sepkoski, 2002	Arthropoda	Trilobita		AGNOSTIDA		Cm	uMid-l	Cm	uMid-m	Motile Benthic	Motile Benthos	No Plausible Swimming Mode, Blind, Depressiform	0.5	Harrington et al., 1959; Fortey & Owens, 1999	Absent	N/A
Cristagnostus	Sepkoski, 2002	Arthropoda	Trilobita		AGNOSTIDA		Cm	Dres-l	Cm	Dres-l	Motile Benthic	Motile Benthos	No Plausible Swimming Mode, Blind, Depressiform	0.5	Harrington et al., 1959; Fortey & Owens, 1999	Absent	N/A
Dawsonia	Sepkoski, 2002	Arthropoda	Trilobita		AGNOSTIDA		Cm	mMid-l	Cm	uMid-l	Motile Benthic	Motile Benthos	No Plausible Swimming Mode, Blind, Depressiform	0.5	Harrington et al., 1959; Fortey & Owens, 1999	Absent	N/A
Delagnostus	Sepkoski, 2002	Arthropoda	Trilobita		AGNOSTIDA		Cm	uMid-u	Cm	uMid-u	Motile Benthic	Motile Benthos	No Plausible Swimming Mode, Blind, Depressiform	0.5	Harrington et al., 1959; Fortey & Owens, 1999	Absent	N/A
Delgadella	Sepkoski, 2002	Arthropoda	Trilobita		AGNOSTIDA		Cm	Atda-u	Cm	Tojo-l	Motile Benthic	Motile Benthos	No Plausible Swimming Mode, Blind, Depressiform	0.5	Harrington et al., 1959; Fortey & Owens, 1999	Absent	N/A
Denagnostus	Sepkoski, 2002	Arthropoda	Trilobita		AGNOSTIDA		Cm	Dres-u	Cm	Dres-u	Motile Benthic	Motile Benthos	No Plausible Swimming Mode, Blind, Depressiform	0.5	Harrington et al., 1959; Fortey & Owens, 1999	Absent	N/A
Dicerodiscus	Sepkoski, 2002	Arthropoda	Trilobita		AGNOSTIDA		Cm	Boto-l	Cm	Boto-l	Motile Benthic	Motile Benthos	No Plausible Swimming Mode, Blind, Depressiform	0.5	Harrington et al., 1959; Fortey & Owens, 1999	Absent	N/A
Dipharus	Sepkoski, 2002	Arthropoda	Trilobita		AGNOSTIDA		Cm	Atda-u	Cm	Boto-l	Motile Benthic	Motile Benthos	No Plausible Swimming Mode, Blind, Depressiform	0.5	Harrington et al., 1959; Fortey & Owens, 1999	Absent	N/A
Diplagnostus	Sepkoski, 2002	Arthropoda	Trilobita		AGNOSTIDA		Cm	uMid-l	Cm	uMid-u	Motile Benthic	Motile Benthos	No Plausible Swimming Mode, Blind, Depressiform	0.5	Harrington et al., 1959; Fortey & Owens, 1999	Absent	N/A
Diplorrhina	Sepkoski, 2002	Arthropoda	Trilobita		AGNOSTIDA		Cm	uMid-l	Cm	uMid-u	Motile Benthic	Motile Benthos	No Plausible Swimming Mode, Blind, Depressiform	0.5	Harrington et al., 1959; Fortey & Owens, 1999	Absent	N/A
Dividuagnostus	Sepkoski, 2002	Arthropoda	Trilobita		AGNOSTIDA		O	Trem	O	Ashg-l	Motile Benthic	Motile Benthos	No Plausible Swimming Mode, Blind, Depressiform	0.5	Harrington et al., 1959; Fortey & Owens, 1999	Absent	N/A
Dolichoagnostus	Sepkoski, 2002	Arthropoda	Trilobita		AGNOSTIDA		Cm	uMid-u	Cm	uMid-u	Motile Benthic	Motile Benthos	No Plausible Swimming Mode, Blind, Depressiform	0.5	Harrington et al., 1959; Fortey & Owens, 1999	Absent	N/A
Doryagnostus	Sepkoski, 2002	Arthropoda	Trilobita		AGNOSTIDA		Cm	uMid-m	Cm	uMid-u	Motile Benthic	Motile Benthos	No Plausible Swimming Mode, Blind, Depressiform	0.5	Harrington et al., 1959; Fortey & Owens, 1999	Absent	N/A
Egyngolia	Sepkoski, 2002	Arthropoda	Trilobita		AGNOSTIDA		Cm	Atda-u	Cm	Atda-u	Motile Benthic	Motile Benthos	No Plausible Swimming Mode, Blind, Depressiform	0.5	Harrington et al., 1959; Fortey & Owens, 1999	Absent	N/A
Ekwipagetia	Sepkoski, 2002	Arthropoda	Trilobita		AGNOSTIDA		Cm	Atda-u	Cm	Atda-u	Motile Benthic	Motile Benthos	No Plausible Swimming Mode, Blind, Depressiform	0.5	Harrington et al., 1959; Fortey & Owens, 1999	Absent	N/A
Eoagnostus	Sepkoski, 2002	Arthropoda	Trilobita		AGNOSTIDA		Cm	Boto	Cm	Boto	Motile Benthic	Motile Benthos	No Plausible Swimming Mode, Blind, Depressiform	0.5	Harrington et al., 1959; Fortey & Owens, 1999	Absent	N/A
Eodiscus	Sepkoski, 2002	Arthropoda	Trilobita		AGNOSTIDA		Cm	Boto	Cm	uMid-m	Motile Benthic	Motile Benthos	No Plausible Swimming Mode, Blind, Depressiform	0.5	Harrington et al., 1959; Fortey & Owens, 1999	Absent	N/A
Eolotagnostus	Sepkoski, 2002	Arthropoda	Trilobita		AGNOSTIDA		Cm	Trep-u	Cm	Trep-u	Motile Benthic	Motile Benthos	No Plausible Swimming Mode, Blind, Depressiform	0.5	Harrington et al., 1959; Fortey & Owens, 1999	Absent	N/A
Euagnostus	Sepkoski, 2002	Arthropoda	Trilobita		AGNOSTIDA		Cm	mMid-u	Cm	uMid-m	Motile Benthic	Motile Benthos	No Plausible Swimming Mode, Blind, Depressiform	0.5	Harrington et al., 1959; Fortey & Owens, 1999	Absent	N/A
Formagnostus	Sepkoski, 2002	Arthropoda	Trilobita		AGNOSTIDA		Cm	uMid-u	Cm	Dres-u	Motile Benthic	Motile Benthos	No Plausible Swimming Mode, Blind, Depressiform	0.5	Harrington et al., 1959; Fortey & Owens, 1999	Absent	N/A
Galbagnostus	Sepkoski, 2002	Arthropoda	Trilobita		AGNOSTIDA		O	Aren-l	O	Llvi-l	Motile Benthic	Motile Benthos	No Plausible Swimming Mode, Blind, Depressiform	0.5	Harrington et al., 1959; Fortey & Owens, 1999	Absent	N/A
Gallagnostus	Sepkoski, 2002	Arthropoda	Trilobita		AGNOSTIDA		Cm	uMid	Cm	uMid	Motile Benthic	Motile Benthos	No Plausible Swimming Mode, Blind, Depressiform	0.5	Harrington et al., 1959; Fortey & Owens, 1999	Absent	N/A
Geragnostella	Sepkoski, 2002	Arthropoda	Trilobita		AGNOSTIDA		O	Aren-l	O	Cara-m	Motile Benthic	Motile Benthos	No Plausible Swimming Mode, Blind, Depressiform	0.5	Harrington et al., 1959; Fortey & Owens, 1999	Absent	N/A
Geragnostus	Sepkoski, 2002	Arthropoda	Trilobita		AGNOSTIDA		O	Trem-u	O	Cara-u	Motile Benthic	Motile Benthos	No Plausible Swimming Mode, Blind, Depressiform	0.5	Harrington et al., 1959; Fortey & Owens, 1999	Absent	N/A
Glaberagnostus	Sepkoski, 2002	Arthropoda	Trilobita		AGNOSTIDA		Cm	Dres-u	Cm	Dres-u	Motile Benthic	Motile Benthos	No Plausible Swimming Mode, Blind, Depressiform	0.5	Harrington et al., 1959; Fortey & Owens, 1999	Absent	N/A
Glyptagnostus	Sepkoski, 2002	Arthropoda	Trilobita		AGNOSTIDA		Cm	Dres-l	Cm	Dres-u	Motile Benthic	Motile Benthos	No Plausible Swimming Mode, Blind, Depressiform	0.5	Harrington et al., 1959; Fortey & Owens, 1999	Absent	N/A
Goniagnostus	Sepkoski, 2002	Arthropoda	Trilobita		AGNOSTIDA		Cm	uMid-l	Cm	uMid-u	Motile Benthic	Motile Benthos	No Plausible Swimming Mode, Blind, Depressiform	0.5	Harrington et al., 1959; Fortey & Owens, 1999	Absent	N/A
Grandagnostus	Sepkoski, 2002	Arthropoda	Trilobita		AGNOSTIDA		Cm	uMid-u	Cm	Dres-u	Motile Benthic	Motile Benthos	No Plausible Swimming Mode, Blind, Depressiform	0.5	Harrington et al., 1959; Fortey & Owens, 1999	Absent	N/A
Granuloagnostus	Sepkoski, 2002	Arthropoda	Trilobita		AGNOSTIDA		O	Llvi	O	Llvi	Motile Benthic	Motile Benthos	No Plausible Swimming Mode, Blind, Depressiform	0.5	Harrington et al., 1959; Fortey & Owens, 1999	Absent	N/A
Gratagnostus	Sepkoski, 2002	Arthropoda	Trilobita		AGNOSTIDA		Cm	uMid-l	Cm	uMid-l	Motile Benthic	Motile Benthos	No Plausible Swimming Mode, Blind, Depressiform	0.5	Harrington et al., 1959; Fortey & Owens, 1999	Absent	N/A
Gymnagnostus	Sepkoski, 2002	Arthropoda	Trilobita		AGNOSTIDA		Cm	Trep-u	Cm	Trep-u	Motile Benthic	Motile Benthos	No Plausible Swimming Mode, Blind, Depressiform	0.5	Harrington et al., 1959; Fortey & Owens, 1999	Absent	N/A
Hadragnostus	Sepkoski, 2002	Arthropoda	Trilobita		AGNOSTIDA		Cm	uMid-u	Cm	Dres-l	Motile Benthic	Motile Benthos	No Plausible Swimming Mode, Blind, Depressiform	0.5	Harrington et al., 1959; Fortey & Owens, 1999	Absent	N/A
Hastagnostus	Sepkoski, 2002	Arthropoda	Trilobita		AGNOSTIDA		Cm	uMid	Cm	uMid	Motile Benthic	Motile Benthos	No Plausible Swimming Mode, Blind, Depressiform	0.5	Harrington et al., 1959; Fortey & Owens, 1999	Absent	N/A
Hebediscina	Sepkoski, 2002	Arthropoda	Trilobita		AGNOSTIDA		Cm	Atda-u	Cm	Boto-u	Motile Benthic	Motile Benthos	No Plausible Swimming Mode, Blind, Depressiform	0.5	Harrington et al., 1959; Fortey & Owens, 1999	Absent	N/A
Hebediscus	Sepkoski, 2002	Arthropoda	Trilobita		AGNOSTIDA		Cm	Atda-l	Cm	Tojo-u	Motile Benthic	Motile Benthos	No Plausible Swimming Mode, Blind, Depressiform	0.5	Harrington et al., 1959; Fortey & Owens, 1999	Absent	N/A
Helepagetia	Sepkoski, 2002	Arthropoda	Trilobita		AGNOSTIDA		Cm	uMid-m	Cm	uMid-u	Motile Benthic	Motile Benthos	No Plausible Swimming Mode, Blind, Depressiform	0.5	Harrington et al., 1959; Fortey & Owens, 1999	Absent	N/A
Homagnostoides	Sepkoski, 2002	Arthropoda	Trilobita		AGNOSTIDA		O	Trem-u	O	Trem-u	Motile Benthic	Motile Benthos	No Plausible Swimming Mode, Blind, Depressiform	0.5	Harrington et al., 1959; Fortey & Owens, 1999	Absent	N/A
Homagnostus	Sepkoski, 2002	Arthropoda	Trilobita		AGNOSTIDA		Cm	Dres-l	Cm	Fran-l	Motile Benthic	Motile Benthos	No Plausible Swimming Mode, Blind, Depressiform	0.5	Harrington et al., 1959; Fortey & Owens, 1999	Absent	N/A
Hypagnostus	Sepkoski, 2002	Arthropoda	Trilobita		AGNOSTIDA		Cm	uMid-l	Cm	Dres-l	Motile Benthic	Motile Benthos	No Plausible Swimming Mode, Blind, Depressiform	0.5	Harrington et al., 1959; Fortey & Owens, 1999	Absent	N/A
Idolagnostus	Sepkoski, 2002	Arthropoda	Trilobita		AGNOSTIDA		Cm	uMid-u	Cm	Dres-u	Motile Benthic	Motile Benthos	No Plausible Swimming Mode, Blind, Depressiform	0.5	Harrington et al., 1959; Fortey & Owens, 1999	Absent	N/A
Iniospheniscus	Sepkoski, 2002	Arthropoda	Trilobita		AGNOSTIDA		Cm	uMid-l	Cm	uMid-m	Motile Benthic	Motile Benthos	No Plausible Swimming Mode, Blind, Depressiform	0.5	Harrington et al., 1959; Fortey & Owens, 1999	Absent	N/A
Innitagnostus	Sepkoski, 2002	Arthropoda	Trilobita		AGNOSTIDA		Cm	uMid-u	Cm	Fran-u	Motile Benthic	Motile Benthos	No Plausible Swimming Mode, Blind, Depressiform	0.5	Harrington et al., 1959; Fortey & Owens, 1999	Absent	N/A
Itagnostus	Sepkoski, 2002	Arthropoda	Trilobita		AGNOSTIDA		Cm	mMid-u	Cm	mMid-u	Motile Benthic	Motile Benthos	No Plausible Swimming Mode, Blind, Depressiform	0.5	Harrington et al., 1959; Fortey & Owens, 1999	Absent	N/A
Ivshinagnostus	Sepkoski, 2002	Arthropoda	Trilobita		AGNOSTIDA		Cm	Fran-l	Cm	Fran-l	Motile Benthic	Motile Benthos	No Plausible Swimming Mode, Blind, Depressiform	0.5	Harrington et al., 1959; Fortey & Owens, 1999	Absent	N/A
Jinghediscus	Sepkoski, 2002	Arthropoda	Trilobita		AGNOSTIDA		Cm	mMid	Cm	mMid	Motile Benthic	Motile Benthos	No Plausible Swimming Mode, Blind, Depressiform	0.5	Harrington et al., 1959; Fortey & Owens, 1999	Absent	N/A
Kiskinella	Sepkoski, 2002	Arthropoda	Trilobita		AGNOSTIDA		Cm	mMid	Cm	mMid	Motile Benthic	Motile Benthos	No Plausible Swimming Mode, Blind, Depressiform	0.5	Harrington et al., 1959; Fortey & Owens, 1999	Absent	N/A
Kormagnostella	Sepkoski, 2002	Arthropoda	Trilobita		AGNOSTIDA		Cm	Dres-l	Cm	Dres-u	Motile Benthic	Motile Benthos	No Plausible Swimming Mode, Blind, Depressiform	0.5	Harrington et al., 1959; Fortey & Owens, 1999	Absent	N/A
Kormagnostus	Sepkoski, 2002	Arthropoda	Trilobita		AGNOSTIDA		Cm	uMid-u	Cm	Dres-l	Motile Benthic	Motile Benthos	No Plausible Swimming Mode, Blind, Depressiform	0.5	Harrington et al., 1959; Fortey & Owens, 1999	Absent	N/A
Korobovia	Sepkoski, 2002	Arthropoda	Trilobita		AGNOSTIDA		Cm	Boto-u	Cm	Boto-u	Motile Benthic	Motile Benthos	No Plausible Swimming Mode, Blind, Depressiform	0.5	Harrington et al., 1959; Fortey & Owens, 1999	Absent	N/A
Kymagnostus	Sepkoski, 2002	Arthropoda	Trilobita		AGNOSTIDA		Cm	Fran-l	Cm	Fran-l	Motile Benthic	Motile Benthos	No Plausible Swimming Mode, Blind, Depressiform	0.5	Harrington et al., 1959; Fortey & Owens, 1999	Absent	N/A
Lavsanodiscus	Sepkoski, 2002	Arthropoda	Trilobita		AGNOSTIDA		Cm	Atda	Cm	Atda	Motile Benthic	Motile Benthos	No Plausible Swimming Mode, Blind, Depressiform	0.5	Harrington et al., 1959; Fortey & Owens, 1999	Absent	N/A
Leiagnostus	Sepkoski, 2002	Arthropoda	Trilobita		AGNOSTIDA		Cm	Trep-u	O	Llde-l	Motile Benthic	Motile Benthos	No Plausible Swimming Mode, Blind, Depressiform	0.5	Harrington et al., 1959; Fortey & Owens, 1999	Absent	N/A
Lejopyge	Sepkoski, 2002	Arthropoda	Trilobita		AGNOSTIDA		Cm	uMid-m	Cm	uMid-u	Motile Benthic	Motile Benthos	No Plausible Swimming Mode, Blind, Depressiform	0.5	Harrington et al., 1959; Fortey & Owens, 1999	Absent	N/A
Lenadiscus	Sepkoski, 2002	Arthropoda	Trilobita		AGNOSTIDA		Cm	Boto-l	Cm	Boto-l	Motile Benthic	Motile Benthos	No Plausible Swimming Mode, Blind, Depressiform	0.5	Harrington et al., 1959; Fortey & Owens, 1999	Absent	N/A
Leptochilodiscus	Sepkoski, 2002	Arthropoda	Trilobita		AGNOSTIDA		Cm	Boto	Cm	Boto	Motile Benthic	Motile Benthos	No Plausible Swimming Mode, Blind, Depressiform	0.5	Harrington et al., 1959; Fortey & Owens, 1999	Absent	N/A
Linguagnostus	Sepkoski, 2002	Arthropoda	Trilobita		AGNOSTIDA		Cm	mMid-u	Cm	uMid-u	Motile Benthic	Motile Benthos	No Plausible Swimming Mode, Blind, Depressiform	0.5	Harrington et al., 1959; Fortey & Owens, 1999	Absent	N/A
Lisogoragnostus	Sepkoski, 2002	Arthropoda	Trilobita		AGNOSTIDA		Cm	uMid-l	Cm	uMid-l	Motile Benthic	Motile Benthos	No Plausible Swimming Mode, Blind, Depressiform	0.5	Harrington et al., 1959; Fortey & Owens, 1999	Absent	N/A
Litagnostus	Sepkoski, 2002	Arthropoda	Trilobita		AGNOSTIDA		Cm	Fran-l	O	Trem-u	Motile Benthic	Motile Benthos	No Plausible Swimming Mode, Blind, Depressiform	0.5	Harrington et al., 1959; Fortey & Owens, 1999	Absent	N/A
Litomatopus	Sepkoski, 2002	Arthropoda	Trilobita		AGNOSTIDA		Cm	Boto	Cm	Boto	Motile Benthic	Motile Benthos	No Plausible Swimming Mode, Blind, Depressiform	0.5	Harrington et al., 1959; Fortey & Owens, 1999	Absent	N/A
Lotagnostus	Sepkoski, 2002	Arthropoda	Trilobita		AGNOSTIDA		Cm	Trep-l	Cm	Trep-u	Motile Benthic	Motile Benthos	No Plausible Swimming Mode, Blind, Depressiform	0.5	Harrington et al., 1959; Fortey & Owens, 1999	Absent	N/A
Macannaia	Sepkoski, 2002	Arthropoda	Trilobita		AGNOSTIDA		Cm	Tojo-u	Cm	mMid-l	Motile Benthic	Motile Benthos	No Plausible Swimming Mode, Blind, Depressiform	0.5	Harrington et al., 1959; Fortey & Owens, 1999	Absent	N/A
Machairagnostus	Sepkoski, 2002	Arthropoda	Trilobita		AGNOSTIDA		Cm	Trep-u	Cm	Trep-u	Motile Benthic	Motile Benthos	No Plausible Swimming Mode, Blind, Depressiform	0.5	Harrington et al., 1959; Fortey & Owens, 1999	Absent	N/A
Mallagnostus	Sepkoski, 2002	Arthropoda	Trilobita		AGNOSTIDA		Cm	Boto	Cm	Tojo	Motile Benthic	Motile Benthos	No Plausible Swimming Mode, Blind, Depressiform	0.5	Harrington et al., 1959; Fortey & Owens, 1999	Absent	N/A
Meniscuchus	Sepkoski, 2002	Arthropoda	Trilobita		AGNOSTIDA		Cm	Boto	Cm	Boto	Motile Benthic	Motile Benthos	No Plausible Swimming Mode, Blind, Depressiform	0.5	Harrington et al., 1959; Fortey & Owens, 1999	Absent	N/A
Micagnostus	Sepkoski, 2002	Arthropoda	Trilobita		AGNOSTIDA		Cm	mMid	Cm	mMid	Motile Benthic	Motile Benthos	No Plausible Swimming Mode, Blind, Depressiform	0.5	Harrington et al., 1959; Fortey & Owens, 1999	Absent	N/A
Micragnostus	Sepkoski, 2002	Arthropoda	Trilobita		AGNOSTIDA		Cm	Dres-u	O	Llvi-l	Motile Benthic	Motile Benthos	No Plausible Swimming Mode, Blind, Depressiform	0.5	Harrington et al., 1959; Fortey & Owens, 1999	Absent	N/A
Miraculaspis	Sepkoski, 2002	Arthropoda	Trilobita		AGNOSTIDA		Cm	Boto	Cm	Boto	Motile Benthic	Motile Benthos	No Plausible Swimming Mode, Blind, Depressiform	0.5	Harrington et al., 1959; Fortey & Owens, 1999	Absent	N/A
Myrmecomimus	Sepkoski, 2002	Arthropoda	Trilobita		AGNOSTIDA		Cm	uMid-m	Cm	uMid-m	Motile Benthic	Motile Benthos	No Plausible Swimming Mode, Blind, Depressiform	0.5	Harrington et al., 1959; Fortey & Owens, 1999	Absent	N/A
Nahannagnostus	Sepkoski, 2002	Arthropoda	Trilobita		AGNOSTIDA		Cm	uMid-u	Cm	Dres-l	Motile Benthic	Motile Benthos	No Plausible Swimming Mode, Blind, Depressiform	0.5	Harrington et al., 1959; Fortey & Owens, 1999	Absent	N/A
Natalina	Sepkoski, 2002	Arthropoda	Trilobita		AGNOSTIDA		Cm	Boto	Cm	Boto	Motile Benthic	Motile Benthos	No Plausible Swimming Mode, Blind, Depressiform	0.5	Harrington et al., 1959; Fortey & Owens, 1999	Absent	N/A
Neoagnostus	Sepkoski, 2002	Arthropoda	Trilobita		AGNOSTIDA		Cm	Fran-l	O	Trem-l	Motile Benthic	Motile Benthos	No Plausible Swimming Mode, Blind, Depressiform	0.5	Harrington et al., 1959; Fortey & Owens, 1999	Absent	N/A
Neocobboldia	Sepkoski, 2002	Arthropoda	Trilobita		AGNOSTIDA		Cm	Boto-l	Cm	Tojo-l	Motile Benthic	Motile Benthos	No Plausible Swimming Mode, Blind, Depressiform	0.5	Harrington et al., 1959; Fortey & Owens, 1999	Absent	N/A
Neopagetina	Sepkoski, 2002	Arthropoda	Trilobita		AGNOSTIDA		Cm	Boto-l	Cm	Tojo-u	Motile Benthic	Motile Benthos	No Plausible Swimming Mode, Blind, Depressiform	0.5	Harrington et al., 1959; Fortey & Owens, 1999	Absent	N/A
Ninadiscus	Sepkoski, 2002	Arthropoda	Trilobita		AGNOSTIDA		Cm	Boto	Cm	Boto	Motile Benthic	Motile Benthos	No Plausible Swimming Mode, Blind, Depressiform	0.5	Harrington et al., 1959; Fortey & Owens, 1999	Absent	N/A
Oedorhachis	Sepkoski, 2002	Arthropoda	Trilobita		AGNOSTIDA		Cm	uMid-u	Cm	Dres-l	Motile Benthic	Motile Benthos	No Plausible Swimming Mode, Blind, Depressiform	0.5	Harrington et al., 1959; Fortey & Owens, 1999	Absent	N/A
Oidalagnostus	Sepkoski, 2002	Arthropoda	Trilobita		AGNOSTIDA		Cm	uMid-u	Cm	Dres-l	Motile Benthic	Motile Benthos	No Plausible Swimming Mode, Blind, Depressiform	0.5	Harrington et al., 1959; Fortey & Owens, 1999	Absent	N/A
Oncagnostus	Sepkoski, 2002	Arthropoda	Trilobita		AGNOSTIDA		Cm	Dres-u	Cm	Trep-u	Motile Benthic	Motile Benthos	No Plausible Swimming Mode, Blind, Depressiform	0.5	Harrington et al., 1959; Fortey & Owens, 1999	Absent	N/A
Onymagnostus	Sepkoski, 2002	Arthropoda	Trilobita		AGNOSTIDA		Cm	mMid-u	Cm	uMid-u	Motile Benthic	Motile Benthos	No Plausible Swimming Mode, Blind, Depressiform	0.5	Harrington et al., 1959; Fortey & Owens, 1999	Absent	N/A
Oodiscus	Sepkoski, 2002	Arthropoda	Trilobita		AGNOSTIDA		Cm	Boto	Cm	Boto	Motile Benthic	Motile Benthos	No Plausible Swimming Mode, Blind, Depressiform	0.5	Harrington et al., 1959; Fortey & Owens, 1999	Absent	N/A
Opsidiscus	Sepkoski, 2002	Arthropoda	Trilobita		AGNOSTIDA		Cm	uMid-u	Cm	uMid-u	Motile Benthic	Motile Benthos	No Plausible Swimming Mode, Blind, Depressiform	0.5	Harrington et al., 1959; Fortey & Owens, 1999	Absent	N/A
Oxyagnostus	Sepkoski, 2002	Arthropoda	Trilobita		AGNOSTIDA		Cm	Dres-l	Cm	Dres-l	Motile Benthic	Motile Benthos	No Plausible Swimming Mode, Blind, Depressiform	0.5	Harrington et al., 1959; Fortey & Owens, 1999	Absent	N/A
Pagetia	Sepkoski, 2002	Arthropoda	Trilobita		AGNOSTIDA		Cm	Boto-l	Cm	mMid-u	Motile Benthic	Motile Benthos	No Plausible Swimming Mode, Blind, Depressiform	0.5	Harrington et al., 1959; Fortey & Owens, 1999	Absent	N/A
Pagetides	Sepkoski, 2002	Arthropoda	Trilobita		AGNOSTIDA		Cm	Atda-u	Cm	Tojo-u	Motile Benthic	Motile Benthos	No Plausible Swimming Mode, Blind, Depressiform	0.5	Harrington et al., 1959; Fortey & Owens, 1999	Absent	N/A
Parapagetia	Sepkoski, 2002	Arthropoda	Trilobita		AGNOSTIDA		Cm	Boto	Cm	Boto	Motile Benthic	Motile Benthos	No Plausible Swimming Mode, Blind, Depressiform	0.5	Harrington et al., 1959; Fortey & Owens, 1999	Absent	N/A
Pentagnostus	Sepkoski, 2002	Arthropoda	Trilobita		AGNOSTIDA		Cm	lMid	Cm	mMid-u	Motile Benthic	Motile Benthos	No Plausible Swimming Mode, Blind, Depressiform	0.5	Harrington et al., 1959; Fortey & Owens, 1999	Absent	N/A
Peratagnostus	Sepkoski, 2002	Arthropoda	Trilobita		AGNOSTIDA		Cm	Dres-u	Cm	Fran-l	Motile Benthic	Motile Benthos	No Plausible Swimming Mode, Blind, Depressiform	0.5	Harrington et al., 1959; Fortey & Owens, 1999	Absent	N/A
Peronopsella	Sepkoski, 2002	Arthropoda	Trilobita		AGNOSTIDA		Cm	mMid-u	Cm	uMid-l	Motile Benthic	Motile Benthos	No Plausible Swimming Mode, Blind, Depressiform	0.5	Harrington et al., 1959; Fortey & Owens, 1999	Absent	N/A
Peronopsis	Sepkoski, 2002	Arthropoda	Trilobita		AGNOSTIDA		Cm	mMid-u	Cm	uMid-u	Motile Benthic	Motile Benthos	No Plausible Swimming Mode, Blind, Depressiform	0.5	Harrington et al., 1959; Fortey & Owens, 1999	Absent	N/A
Phalacroma	Sepkoski, 2002	Arthropoda	Trilobita		AGNOSTIDA		Cm	mMid-u	Cm	uMid-m	Motile Benthic	Motile Benthos	No Plausible Swimming Mode, Blind, Depressiform	0.5	Harrington et al., 1959; Fortey & Owens, 1999	Absent	N/A
Phalagnostus	Sepkoski, 2002	Arthropoda	Trilobita		AGNOSTIDA		Cm	uMid-m	Cm	Dres-l	Motile Benthic	Motile Benthos	No Plausible Swimming Mode, Blind, Depressiform	0.5	Harrington et al., 1959; Fortey & Owens, 1999	Absent	N/A
Phaldagnostus	Sepkoski, 2002	Arthropoda	Trilobita		AGNOSTIDA		Cm	Dres-u	Cm	Dres-u	Motile Benthic	Motile Benthos	No Plausible Swimming Mode, Blind, Depressiform	0.5	Harrington et al., 1959; Fortey & Owens, 1999	Absent	N/A
Phoidagnostus	Sepkoski, 2002	Arthropoda	Trilobita		AGNOSTIDA		Cm	uMid-u	Cm	uMid-u	Motile Benthic	Motile Benthos	No Plausible Swimming Mode, Blind, Depressiform	0.5	Harrington et al., 1959; Fortey & Owens, 1999	Absent	N/A
Pleurinodus	Sepkoski, 2002	Arthropoda	Trilobita		AGNOSTIDA		Cm	Dres-l	Cm	Dres-l	Motile Benthic	Motile Benthos	No Plausible Swimming Mode, Blind, Depressiform	0.5	Harrington et al., 1959; Fortey & Owens, 1999	Absent	N/A
Pleuroctenium	Sepkoski, 2002	Arthropoda	Trilobita		AGNOSTIDA		Cm	mMid-u	Cm	uMid-m	Motile Benthic	Motile Benthos	No Plausible Swimming Mode, Blind, Depressiform	0.5	Harrington et al., 1959; Fortey & Owens, 1999	Absent	N/A
Proagnostus	Sepkoski, 2002	Arthropoda	Trilobita		AGNOSTIDA		Cm	uMid-u	Cm	Dres-l	Motile Benthic	Motile Benthos	No Plausible Swimming Mode, Blind, Depressiform	0.5	Harrington et al., 1959; Fortey & Owens, 1999	Absent	N/A
Pseudagnostina	Sepkoski, 2002	Arthropoda	Trilobita		AGNOSTIDA		Cm	Dres-l	Cm	Dres-l	Motile Benthic	Motile Benthos	No Plausible Swimming Mode, Blind, Depressiform	0.5	Harrington et al., 1959; Fortey & Owens, 1999	Absent	N/A
Pseudagnostus	Sepkoski, 2002	Arthropoda	Trilobita		AGNOSTIDA		Cm	Dres-l	Cm	Fran-u	Motile Benthic	Motile Benthos	No Plausible Swimming Mode, Blind, Depressiform	0.5	Harrington et al., 1959; Fortey & Owens, 1999	Absent	N/A
Pseudocobboldia	Sepkoski, 2002	Arthropoda	Trilobita		AGNOSTIDA		Cm	Tojo-l	Cm	lMid	Motile Benthic	Motile Benthos	No Plausible Swimming Mode, Blind, Depressiform	0.5	Harrington et al., 1959; Fortey & Owens, 1999	Absent	N/A
Pseudoglyptagnostus	Sepkoski, 2002	Arthropoda	Trilobita		AGNOSTIDA		Cm	Fran-l	Cm	Fran-l	Motile Benthic	Motile Benthos	No Plausible Swimming Mode, Blind, Depressiform	0.5	Harrington et al., 1959; Fortey & Owens, 1999	Absent	N/A
Pseudoperonopsis	Sepkoski, 2002	Arthropoda	Trilobita		AGNOSTIDA		Cm	uMid-l	Cm	uMid-l	Motile Benthic	Motile Benthos	No Plausible Swimming Mode, Blind, Depressiform	0.5	Harrington et al., 1959; Fortey & Owens, 1999	Absent	N/A
Ptychagnostus	Sepkoski, 2002	Arthropoda	Trilobita		AGNOSTIDA		Cm	uMid-m	Cm	uMid-m	Motile Benthic	Motile Benthos	No Plausible Swimming Mode, Blind, Depressiform	0.5	Harrington et al., 1959; Fortey & Owens, 1999	Absent	N/A
Quadragnostus	Sepkoski, 2002	Arthropoda	Trilobita		AGNOSTIDA		Cm	uMid	Cm	uMid	Motile Benthic	Motile Benthos	No Plausible Swimming Mode, Blind, Depressiform	0.5	Harrington et al., 1959; Fortey & Owens, 1999	Absent	N/A
Quadrahomagnostus	Sepkoski, 2002	Arthropoda	Trilobita		AGNOSTIDA		Cm	Dres-l	Cm	Dres-l	Motile Benthic	Motile Benthos	No Plausible Swimming Mode, Blind, Depressiform	0.5	Harrington et al., 1959; Fortey & Owens, 1999	Absent	N/A
Raragnostus	Sepkoski, 2002	Arthropoda	Trilobita		AGNOSTIDA		Cm	mMid	Cm	uMid-u	Motile Benthic	Motile Benthos	No Plausible Swimming Mode, Blind, Depressiform	0.5	Harrington et al., 1959; Fortey & Owens, 1999	Absent	N/A
Rhaptagnostus	Sepkoski, 2002	Arthropoda	Trilobita		AGNOSTIDA		Cm	Fran-l	O	Trem-l	Motile Benthic	Motile Benthos	No Plausible Swimming Mode, Blind, Depressiform	0.5	Harrington et al., 1959; Fortey & Owens, 1999	Absent	N/A
Rhodotypiscus	Sepkoski, 2002	Arthropoda	Trilobita		AGNOSTIDA		Cm	mMid-u	Cm	uMid-u	Motile Benthic	Motile Benthos	No Plausible Swimming Mode, Blind, Depressiform	0.5	Harrington et al., 1959; Fortey & Owens, 1999	Absent	N/A
Runcinodiscus	Sepkoski, 2002	Arthropoda	Trilobita		AGNOSTIDA		Cm	Boto-u	Cm	Boto-u	Motile Benthic	Motile Benthos	No Plausible Swimming Mode, Blind, Depressiform	0.5	Harrington et al., 1959; Fortey & Owens, 1999	Absent	N/A
Semadiscus	Sepkoski, 2002	Arthropoda	Trilobita		AGNOSTIDA		Cm	Boto-l	Cm	Boto-l	Motile Benthic	Motile Benthos	No Plausible Swimming Mode, Blind, Depressiform	0.5	Harrington et al., 1959; Fortey & Owens, 1999	Absent	N/A
Serrodiscus	Sepkoski, 2002	Arthropoda	Trilobita		AGNOSTIDA		Cm	Atda-u	Cm	Tojo-u	Motile Benthic	Motile Benthos	No Plausible Swimming Mode, Blind, Depressiform	0.5	Harrington et al., 1959; Fortey & Owens, 1999	Absent	N/A
Sinodiscus	Sepkoski, 2002	Arthropoda	Trilobita		AGNOSTIDA		Cm	Atda-u	Cm	Atda-u	Motile Benthic	Motile Benthos	No Plausible Swimming Mode, Blind, Depressiform	0.5	Harrington et al., 1959; Fortey & Owens, 1999	Absent	N/A
Sinopagetia	Sepkoski, 2002	Arthropoda	Trilobita		AGNOSTIDA		Cm	mMid	Cm	mMid	Motile Benthic	Motile Benthos	No Plausible Swimming Mode, Blind, Depressiform	0.5	Harrington et al., 1959; Fortey & Owens, 1999	Absent	N/A
Skryjagnostus	Sepkoski, 2002	Arthropoda	Trilobita		AGNOSTIDA		Cm	mMid	Cm	mMid	Motile Benthic	Motile Benthos	No Plausible Swimming Mode, Blind, Depressiform	0.5	Harrington et al., 1959; Fortey & Owens, 1999	Absent	N/A
Sphaeragnostus	Sepkoski, 2002	Arthropoda	Trilobita		AGNOSTIDA		O	Trem-u	O	Ashg-m	Motile Benthic	Motile Benthos	No Plausible Swimming Mode, Blind, Depressiform	0.5	Harrington et al., 1959; Fortey & Owens, 1999	Absent	N/A
Stigmadiscus	Sepkoski, 2002	Arthropoda	Trilobita		AGNOSTIDA		Cm	Boto	Cm	Boto	Motile Benthic	Motile Benthos	No Plausible Swimming Mode, Blind, Depressiform	0.5	Harrington et al., 1959; Fortey & Owens, 1999	Absent	N/A
Strictagnostus	Sepkoski, 2002	Arthropoda	Trilobita		AGNOSTIDA		Cm	Trep-u	O	Trem-l	Motile Benthic	Motile Benthos	No Plausible Swimming Mode, Blind, Depressiform	0.5	Harrington et al., 1959; Fortey & Owens, 1999	Absent	N/A
Sulcatagnostus	Sepkoski, 2002	Arthropoda	Trilobita		AGNOSTIDA		Cm	Dres-u	Cm	Trep-l	Motile Benthic	Motile Benthos	No Plausible Swimming Mode, Blind, Depressiform	0.5	Harrington et al., 1959; Fortey & Owens, 1999	Absent	N/A
Svenax	Sepkoski, 2002	Arthropoda	Trilobita		AGNOSTIDA		Cm	uMid-m	Cm	uMid-u	Motile Benthic	Motile Benthos	No Plausible Swimming Mode, Blind, Depressiform	0.5	Harrington et al., 1959; Fortey & Owens, 1999	Absent	N/A
Tannudiscus	Sepkoski, 2002	Arthropoda	Trilobita		AGNOSTIDA		Cm	Tojo	Cm	Tojo	Motile Benthic	Motile Benthos	No Plausible Swimming Mode, Blind, Depressiform	0.5	Harrington et al., 1959; Fortey & Owens, 1999	Absent	N/A
Tasagnostus	Sepkoski, 2002	Arthropoda	Trilobita		AGNOSTIDA		Cm	uMid-u	Cm	uMid-u	Motile Benthic	Motile Benthos	No Plausible Swimming Mode, Blind, Depressiform	0.5	Harrington et al., 1959; Fortey & Owens, 1999	Absent	N/A
Tchernyshvioides	Sepkoski, 2002	Arthropoda	Trilobita		AGNOSTIDA		Cm	mMid	Cm	mMid	Motile Benthic	Motile Benthos	No Plausible Swimming Mode, Blind, Depressiform	0.5	Harrington et al., 1959; Fortey & Owens, 1999	Absent	N/A
Tentagnostus	Sepkoski, 2002	Arthropoda	Trilobita		AGNOSTIDA		Cm	Fran-u	Cm	Fran-u	Motile Benthic	Motile Benthos	No Plausible Swimming Mode, Blind, Depressiform	0.5	Harrington et al., 1959; Fortey & Owens, 1999	Absent	N/A
Tomagnostella	Sepkoski, 2002	Arthropoda	Trilobita		AGNOSTIDA		Cm	uMid-m	Cm	Dres-l	Motile Benthic	Motile Benthos	No Plausible Swimming Mode, Blind, Depressiform	0.5	Harrington et al., 1959; Fortey & Owens, 1999	Absent	N/A
Tomagnostus	Sepkoski, 2002	Arthropoda	Trilobita		AGNOSTIDA		Cm	mMid-u	Cm	uMid-m	Motile Benthic	Motile Benthos	No Plausible Swimming Mode, Blind, Depressiform	0.5	Harrington et al., 1959; Fortey & Owens, 1999	Absent	N/A
Toragnostus	Sepkoski, 2002	Arthropoda	Trilobita		AGNOSTIDA		Cm	uMid-u	Cm	uMid-u	Motile Benthic	Motile Benthos	No Plausible Swimming Mode, Blind, Depressiform	0.5	Harrington et al., 1959; Fortey & Owens, 1999	Absent	N/A
Triadaspis	Sepkoski, 2002	Arthropoda	Trilobita		AGNOSTIDA		Cm	uMid-u	Cm	uMid-u	Motile Benthic	Motile Benthos	No Plausible Swimming Mode, Blind, Depressiform	0.5	Harrington et al., 1959; Fortey & Owens, 1999	Absent	N/A
Triangulaspis	Sepkoski, 2002	Arthropoda	Trilobita		AGNOSTIDA		Cm	Atda-u	Cm	Boto-l	Motile Benthic	Motile Benthos	No Plausible Swimming Mode, Blind, Depressiform	0.5	Harrington et al., 1959; Fortey & Owens, 1999	Absent	N/A
Triangullina	Sepkoski, 2002	Arthropoda	Trilobita		AGNOSTIDA		Cm	Atda-l	Cm	Atda-l	Motile Benthic	Motile Benthos	No Plausible Swimming Mode, Blind, Depressiform	0.5	Harrington et al., 1959; Fortey & Owens, 1999	Absent	N/A
Trilobagnostus	Sepkoski, 2002	Arthropoda	Trilobita		AGNOSTIDA		Cm	Trep-l	O	Trem-l	Motile Benthic	Motile Benthos	No Plausible Swimming Mode, Blind, Depressiform	0.5	Harrington et al., 1959; Fortey & Owens, 1999	Absent	N/A
Trinodus	Sepkoski, 2002	Arthropoda	Trilobita		AGNOSTIDA		O	Llde	O	Llde	Motile Benthic	Motile Benthos	No Plausible Swimming Mode, Blind, Depressiform	0.5	Harrington et al., 1959; Fortey & Owens, 1999	Absent	N/A
Triplagnostus	Sepkoski, 2002	Arthropoda	Trilobita		AGNOSTIDA		Cm	mMid-u	Cm	uMid-m	Motile Benthic	Motile Benthos	No Plausible Swimming Mode, Blind, Depressiform	0.5	Harrington et al., 1959; Fortey & Owens, 1999	Absent	N/A
Trisulcagnostus	Sepkoski, 2002	Arthropoda	Trilobita		AGNOSTIDA		Cm	Trep-l	Cm	Trep-l	Motile Benthic	Motile Benthos	No Plausible Swimming Mode, Blind, Depressiform	0.5	Harrington et al., 1959; Fortey & Owens, 1999	Absent	N/A
Tsunyidiscus	Sepkoski, 2002	Arthropoda	Trilobita		AGNOSTIDA		Cm	Atda-u	Cm	Atda-u	Motile Benthic	Motile Benthos	No Plausible Swimming Mode, Blind, Depressiform	0.5	Harrington et al., 1959; Fortey & Owens, 1999	Absent	N/A
Utagnostus	Sepkoski, 2002	Arthropoda	Trilobita		AGNOSTIDA		Cm	uMid-m	Cm	uMid-u	Motile Benthic	Motile Benthos	No Plausible Swimming Mode, Blind, Depressiform	0.5	Harrington et al., 1959; Fortey & Owens, 1999	Absent	N/A
Valenagnostus	Sepkoski, 2002	Arthropoda	Trilobita		AGNOSTIDA		Cm	uMid-m	Cm	uMid-u	Motile Benthic	Motile Benthos	No Plausible Swimming Mode, Blind, Depressiform	0.5	Harrington et al., 1959; Fortey & Owens, 1999	Absent	N/A
Weymouthia	Sepkoski, 2002	Arthropoda	Trilobita		AGNOSTIDA		Cm	Atda-l	Cm	Atda-u	Motile Benthic	Motile Benthos	No Plausible Swimming Mode, Blind, Depressiform	0.5	Harrington et al., 1959; Fortey & Owens, 1999	Absent	N/A
Xestagnostus	Sepkoski, 2002	Arthropoda	Trilobita		AGNOSTIDA		Cm	Dres-l	Cm	Dres-l	Motile Benthic	Motile Benthos	No Plausible Swimming Mode, Blind, Depressiform	0.5	Harrington et al., 1959; Fortey & Owens, 1999	Absent	N/A
Xyoeax	Sepkoski, 2002	Arthropoda	Trilobita		AGNOSTIDA		D	Emsi	D	Emsi	Motile Benthic	Motile Benthos	No Plausible Swimming Mode, Blind, Depressiform	0.5	Harrington et al., 1959; Fortey & Owens, 1999	Absent	N/A
Yukonides	Sepkoski, 2002	Arthropoda	Trilobita		AGNOSTIDA		Cm	Atda-u	Cm	Atda-u	Motile Benthic	Motile Benthos	No Plausible Swimming Mode, Blind, Depressiform	0.5	Harrington et al., 1959; Fortey & Owens, 1999	Absent	N/A
Zeteagnostus	Sepkoski, 2002	Arthropoda	Trilobita		AGNOSTIDA		Cm	mMid-u	Cm	uMid-m	Motile Benthic	Motile Benthos	No Plausible Swimming Mode, Blind, Depressiform	0.5	Harrington et al., 1959; Fortey & Owens, 1999	Absent	N/A
Bohemilla	Sepkoski, 2002	Arthropoda	Trilobita		ASAPHIDA	Bohemillidae	O	Trem-u	O	Ashg	Planktic	Nektoplankton	Hypertrophied Eyes, Ventral-ward Glenal Spines, Poorly Streamlined	0.75	Harrington et al., 1959; Fortey, 1985	Absent	N/A
Aspidaeglina	Sepkoski, 2002	Arthropoda	Trilobita		ASAPHIDA	Cyclopygidae	O	Aren-l	O	Aren-l	Planktic	Nektoplankton	Hypertrophied Eyes, Ventral-ward Glenal Spines, Poorly Streamlined	0.75	Harrington et al., 1959; Fortey, 1985	Absent	N/A
Cyclopyge	Sepkoski, 2002	Arthropoda	Trilobita		ASAPHIDA	Cyclopygidae	O	Trem-l	O	Ashg-u	Planktic	Nektoplankton	Hypertrophied Eyes, Ventral-ward Glenal Spines, Poorly Streamlined	0.75	Harrington et al., 1959; Fortey, 1985; Fortey, 2004	Absent	N/A
Degamella	Sepkoski, 2002	Arthropoda	Trilobita		ASAPHIDA	Cyclopygidae	O	Aren-u	O	Ashg-m	Nektic	Planktonekton	Hypertrophied Eyes, Ventral-ward Glenal Spines, Well Streamlined	0.75	Harrington et al., 1959; Fortey, 1985; Fortey, 2004	Absent	N/A
Ellipsotaphrus	Sepkoski, 2002	Arthropoda	Trilobita		ASAPHIDA	Cyclopygidae	O	Aren-l	O	Ashg	Planktic	Nektoplankton	Hypertrophied Eyes, Ventral-ward Glenal Spines, Poorly Streamlined	0.75	Harrington et al., 1959; Fortey, 1985	Absent	N/A
Heterocyclopyge	Sepkoski, 2002	Arthropoda	Trilobita		ASAPHIDA	Cyclopygidae	O	Llde-u	O	Ashg-m	Planktic	Nektoplankton	Hypertrophied Eyes, Ventral-ward Glenal Spines, Poorly Streamlined	0.75	Harrington et al., 1959; Fortey, 1985	Absent	N/A
Microparia	Sepkoski, 2002	Arthropoda	Trilobita		ASAPHIDA	Cyclopygidae	O	Aren-l	O	Ashg-m	Nektic	Planktonekton	Hypertrophied Eyes, Ventral-ward Glenal Spines, Well Streamlined	0.75	Harrington et al., 1959; Fortey, 1985; Fortey, 2004	Absent	N/A
Pricyclopyge	Sepkoski, 2002	Arthropoda	Trilobita		ASAPHIDA	Cyclopygidae	O	Aren-u	O	Llde-l	Planktic	Nektoplankton	Hypertrophied Eyes, Ventral-ward Glenal Spines, Poorly Streamlined	0.75	Harrington et al., 1959; Fortey, 1985; Fortey, 2004	Absent	N/A
Psilacella	Sepkoski, 2002	Arthropoda	Trilobita		ASAPHIDA	Cyclopygidae	O	Aren-u	O	Ashg	Planktic	Nektoplankton	Hypertrophied Eyes, Ventral-ward Glenal Spines, Poorly Streamlined	0.75	Harrington et al., 1959; Fortey, 1985	Absent	N/A
Symphysops	Sepkoski, 2002	Arthropoda	Trilobita		ASAPHIDA	Cyclopygidae	O	Llvi	O	Ashg-m	Planktic	Nektoplankton	Hypertrophied Eyes, Ventral-ward Glenal Spines, Poorly Streamlined	0.75	Harrington et al., 1959; Fortey, 1985	Absent	N/A
Parabarrandia	Sepkoski, 2002	Arthropoda	Trilobita		ASAPHIDA	Nileidae	O	Llvi	O	Llde-l	Nektic	Planktonekton	Hypertrophied Eyes, Ventral-ward Glenal Spines, Well Streamlined, Elasmobranch-like Hydrofoil, Elongate "Nose"	0.75	Fortey, 1985; Fortey, 2004	Absent	N/A
Apatokephalina	Sepkoski, 2002	Arthropoda	Trilobita		ASAPHIDA	Remopleurididae	Cm	Trep	Cm	Trep	Nektic	Planktonekton	Long Forked Hypostome Provides Hydrodynamic Lift and Stabilizing Flow, High-Performance Swmmer, Highly Streamlined Nearly 360° Eyes, Depressiform	0.5	Harrington et al., 1959; Shiino et al., 2012	Absent	N/A
Apatokephalus	Sepkoski, 2002	Arthropoda	Trilobita		ASAPHIDA	Remopleurididae	O	Trem-l	O	Trem-u	Nektic	Planktonekton	Long Forked Hypostome Provides Hydrodynamic Lift and Stabilizing Flow, High-Performance Swmmer, Highly Streamlined Nearly 360° Eyes, Depressiform	0.5	Harrington et al., 1959; Shiino et al., 2012	Absent	N/A
Eorobergia	Sepkoski, 2002	Arthropoda	Trilobita		ASAPHIDA	Remopleurididae	O	Trem-u	O	Llde-u	Nektic	Planktonekton	Long Forked Hypostome Provides Hydrodynamic Lift and Stabilizing Flow, High-Performance Swmmer, Highly Streamlined Nearly 360° Eyes, Depressiform	0.5	Harrington et al., 1959; Shiino et al., 2012	Absent	N/A
Kainella	Sepkoski, 2002	Arthropoda	Trilobita		ASAPHIDA	Remopleurididae	O	Trem-l	O	Aren	Nektic	Planktonekton	Long Forked Hypostome Provides Hydrodynamic Lift and Stabilizing Flow, High-Performance Swmmer, Highly Streamlined Nearly 360° Eyes, Depressiform	0.5	Harrington et al., 1959; Shiino et al., 2012	Absent	N/A
Lichapyge	Sepkoski, 2002	Arthropoda	Trilobita		ASAPHIDA	Remopleurididae	O	Trem-l	O	Trem-u	Nektic	Planktonekton	Long Forked Hypostome Provides Hydrodynamic Lift and Stabilizing Flow, High-Performance Swmmer, Highly Streamlined Nearly 360° Eyes, Depressiform	0.5	Harrington et al., 1959; Shiino et al., 2012	Absent	N/A
Macropyge	Sepkoski, 2002	Arthropoda	Trilobita		ASAPHIDA	Remopleurididae	Cm	Trep-l	O	Trem-u	Nektic	Planktonekton	Long Forked Hypostome Provides Hydrodynamic Lift and Stabilizing Flow, High-Performance Swmmer, Highly Streamlined Nearly 360° Eyes, Depressiform	0.5	Harrington et al., 1959; Shiino et al., 2012	Absent	N/A
Menoparia	Sepkoski, 2002	Arthropoda	Trilobita		ASAPHIDA	Remopleurididae	O	Trem-u	O	Trem-u	Nektic	Planktonekton	Long Forked Hypostome Provides Hydrodynamic Lift and Stabilizing Flow, High-Performance Swmmer, Highly Streamlined Nearly 360° Eyes, Depressiform	0.5	Harrington et al., 1959; Shiino et al., 2012	Absent	N/A
Pseudokainella	Sepkoski, 2002	Arthropoda	Trilobita		ASAPHIDA	Remopleurididae	O	Trem-l	O	Trem-u	Nektic	Planktonekton	Long Forked Hypostome Provides Hydrodynamic Lift and Stabilizing Flow, High-Performance Swmmer, Highly Streamlined Nearly 360° Eyes, Depressiform	0.5	Harrington et al., 1959; Shiino et al., 2012	Absent	N/A
Remopleurides	Sepkoski, 2002	Arthropoda	Trilobita		ASAPHIDA	Remopleurididae	O	Llvi-l	O	Ashg-u	Nektic	Planktonekton	Long Forked Hypostome Provides Hydrodynamic Lift and Stabilizing Flow, High-Performance Swmmer, Highly Streamlined Nearly 360° Eyes, Depressiform	0.5	Harrington et al., 1959; Shiino et al., 2012	Absent	N/A
Remopleuridiella	Sepkoski, 2002	Arthropoda	Trilobita		ASAPHIDA	Remopleurididae	O	Trem-l	O	Trem-u	Nektic	Planktonekton	Long Forked Hypostome Provides Hydrodynamic Lift and Stabilizing Flow, High-Performance Swmmer, Highly Streamlined Nearly 360° Eyes, Depressiform	0.5	Harrington et al., 1959; Shiino et al., 2012	Absent	N/A
Richardsonella	Sepkoski, 2002	Arthropoda	Trilobita		ASAPHIDA	Remopleurididae	Cm	Fran-u	Cm	Trep	Nektic	Planktonekton	Long Forked Hypostome Provides Hydrodynamic Lift and Stabilizing Flow, High-Performance Swmmer, Highly Streamlined Nearly 360° Eyes, Depressiform	0.5	Harrington et al., 1959; Shiino et al., 2012	Absent	N/A
Robergia	Sepkoski, 2002	Arthropoda	Trilobita		ASAPHIDA	Remopleurididae	O	Llvi-u	O	Ashg	Nektic	Planktonekton	Long Forked Hypostome Provides Hydrodynamic Lift and Stabilizing Flow, High-Performance Swmmer, Highly Streamlined Nearly 360° Eyes, Depressiform	0.5	Harrington et al., 1959; Shiino et al., 2012	Absent	N/A
Scinocephalus	Sepkoski, 2002	Arthropoda	Trilobita		ASAPHIDA	Remopleurididae	O	Trem-u	O	Trem-u	Nektic	Planktonekton	Long Forked Hypostome Provides Hydrodynamic Lift and Stabilizing Flow, High-Performance Swmmer, Highly Streamlined Nearly 360° Eyes, Depressiform	0.5	Harrington et al., 1959; Shiino et al., 2012	Absent	N/A
Teratorhynchus	Sepkoski, 2002	Arthropoda	Trilobita		ASAPHIDA	Remopleurididae	O	Cara-l	O	Cara-l	Nektic	Planktonekton	Long Forked Hypostome Provides Hydrodynamic Lift and Stabilizing Flow, High-Performance Swmmer, Highly Streamlined Nearly 360° Eyes, Depressiform	0.5	Harrington et al., 1959; Shiino et al., 2012	Absent	N/A
Opipeuter	Sepkoski, 2002	Arthropoda	Trilobita		ASAPHIDA	Telephinidae	O	Aren-l	O	Aren-u	Planktic	Nektoplankton	Small (2-4 cm), Hypertrophied Eyes, Poorly Streamlined	0.75	Fortey, 1985; Fortey, 2004	Absent	N/A
Liwia	Sepkoski, 2002	Arthropoda	Trilobita		NARAOIIDA		Cm	Atda-l	Cm	Atda-l	Demersal	Nektobenthos	Lightly Sclerotized, Depressed, Swimming Exopods	1	Budd, 1999; Haug & Haug, 2016	Absent	N/A
Maritimella	Sepkoski, 2002	Arthropoda	Trilobita		NARAOIIDA		Cm	m	Cm	u	Demersal	Nektobenthos	Lightly Sclerotized, Depressed, Swimming Exopods	1	Budd, 1999; Haug & Haug, 2016	Absent	N/A
Naraoia	Sepkoski, 2002	Arthropoda	Trilobita		NARAOIIDA		Cm	Atda-u	Cm	uMid-m	Demersal	Nektobenthos	Lightly Sclerotized, Depressed, Swimming Exopods	1	Budd, 1999; Haug & Haug, 2016	Absent	N/A
Sapenion	Sepkoski, 2002	Arthropoda	Trilobita		NARAOIIDA		Cm	Atda-u	Cm	Atda-u	Demersal	Nektobenthos	Lightly Sclerotized, Depressed, Swimming Exopods	1	Budd, 1999; Haug & Haug, 2016	Absent	N/A
Soomaspis	Sepkoski, 2002	Arthropoda	Trilobita		NARAOIIDA		O	Ashg	O	Ashg	Demersal	Nektobenthos	Lightly Sclerotized, Depressed, Swimming Exopods	1	Budd, 1999; Haug & Haug, 2016	Absent	N/A
Tarricoia	Sepkoski, 2002	Arthropoda	Trilobita		NARAOIIDA		O	m	O	u	Demersal	Nektobenthos	Lightly Sclerotized, Depressed, Swimming Exopods	1	Budd, 1999; Haug & Haug, 2016	Absent	N/A
Tegopelte	Sepkoski, 2002	Arthropoda	Trilobita		NARAOIIDA		Cm	mMid-u	Cm	mMid-u	Demersal	Nektobenthos	Lightly Sclerotized, Depressed, Swimming Exopods	1	Budd, 1999; Haug & Haug, 2016	Absent	N/A
Hypodicranotus	Sepkoski, 2002	Arthropoda	Trilobita		PHACOPIDA	Remopleurididae	O	Llde-l	O	Ashg	Nektic	Planktonekton	Long Forked Hypostome Provides Hydrodynamic Lift and Stabilizing Flow, High-Performance Swmmer, Highly Streamlined Nearly 360° Eyes	0.5	Shiino et al., 2012	Absent	N/A
Carolinites	Sepkoski, 2002	Arthropoda	Trilobita		PROETIDA	Telephinidae	O	Aren-l	O	Llvi-u	Planktic	Nektoplankton	Small (2-4 cm), Hypertrophied Eyes, Poorly Streamlined, Planktic Global Equatorial Distribution	0.75	Fortey, 1985; Fortey, 2004	Absent	N/A
Telephina	Sepkoski, 2002	Arthropoda	Trilobita		PROETIDA	Telephinidae	O	Aren-u	O	Ashg-m	Planktic	Nektoplankton	Hypertrophied Eyes, Poorly Streamlined	0.75	Fortey, 1985	Absent	N/A
Aceroproetus	Sepkoski, 2002	Arthropoda	Trilobita		PROETIDA		S	Wenl	S	Wenl	Demersal	Nektobenthos	Compact, Convex, Capable of Faster Swimming	0.75	Fortey & Owens, 1999	Absent	N/A
Acetopeltis	Sepkoski, 2002	Arthropoda	Trilobita		PROETIDA		O	Ashg	O	Ashg	Demersal	Nektobenthos	Compact, Convex, Capable of Faster Swimming	0.75	Fortey & Owens, 1999	Absent	N/A
Acidiphorus	Sepkoski, 2002	Arthropoda	Trilobita		PROETIDA		O	Aren-l	O	Llvi-l	Demersal	Nektobenthos	Compact, Convex, Capable of Faster Swimming	0.75	Fortey & Owens, 1999	Absent	N/A
Acropyge	Sepkoski, 2002	Arthropoda	Trilobita		PROETIDA		P	Guad-u	P	Dora	Demersal	Nektobenthos	Compact, Convex, Capable of Faster Swimming	0.75	Fortey & Owens, 1999	Absent	N/A
Agerina	Sepkoski, 2002	Arthropoda	Trilobita		PROETIDA		O	Trem	O	Cara-l	Demersal	Nektobenthos	Compact, Convex, Capable of Faster Swimming	0.75	Fortey & Owens, 1999	Absent	N/A
Alberticoryphe	Sepkoski, 2002	Arthropoda	Trilobita		PROETIDA		D	Sieg	D	Emsi-l	Demersal	Nektobenthos	Compact, Convex, Capable of Faster Swimming	0.75	Fortey & Owens, 1999	Absent	N/A
Amblycranium	Sepkoski, 2002	Arthropoda	Trilobita		PROETIDA		O	Trem-u	O	Trem-u	Demersal	Nektobenthos	Compact, Convex, Capable of Faster Swimming	0.75	Fortey & Owens, 1999	Absent	N/A
Ameura	Sepkoski, 2002	Arthropoda	Trilobita		PROETIDA		C	Serp-l	P	Sakm	Demersal	Nektobenthos	Compact, Convex, Capable of Faster Swimming	0.75	Fortey & Owens, 1999	Absent	N/A
Ampulliglabella	Sepkoski, 2002	Arthropoda	Trilobita		PROETIDA		P	m	P	m	Demersal	Nektobenthos	Compact, Convex, Capable of Faster Swimming	0.75	Fortey & Owens, 1999	Absent	N/A
Analocaspis	Sepkoski, 2002	Arthropoda	Trilobita		PROETIDA		O	Cara	O	Cara	Demersal	Nektobenthos	Compact, Convex, Capable of Faster Swimming	0.75	Fortey & Owens, 1999	Absent	N/A
Anisopyge	Sepkoski, 2002	Arthropoda	Trilobita		PROETIDA		P	Leon-l	P	Guad-u	Demersal	Nektobenthos	Compact, Convex, Capable of Faster Swimming	0.75	Fortey & Owens, 1999	Absent	N/A
Appendicysta	Sepkoski, 2002	Arthropoda	Trilobita		PROETIDA		C	Bash-u	C	Bash-u	Demersal	Nektobenthos	Compact, Convex, Capable of Faster Swimming	0.75	Fortey & Owens, 1999	Absent	N/A
Aprathia	Sepkoski, 2002	Arthropoda	Trilobita		PROETIDA		C	Tour-u	C	Vise-u	Demersal	Nektobenthos	Compact, Convex, Capable of Faster Swimming	0.75	Fortey & Owens, 1999	Absent	N/A
Archegonus	Sepkoski, 2002	Arthropoda	Trilobita		PROETIDA		D	Fras	C	Vise-u	Demersal	Nektobenthos	Compact, Convex, Capable of Faster Swimming	0.75	Fortey & Owens, 1999	Absent	N/A
Ascopeltis	Sepkoski, 2002	Arthropoda	Trilobita		PROETIDA		O	Ashg-l	O	Ashg-m	Demersal	Nektobenthos	Compact, Convex, Capable of Faster Swimming	0.75	Fortey & Owens, 1999	Absent	N/A
Asiagena	Sepkoski, 2002	Arthropoda	Trilobita		PROETIDA		D	Gedi	D	Gedi	Demersal	Nektobenthos	Compact, Convex, Capable of Faster Swimming	0.75	Fortey & Owens, 1999	Absent	N/A
Astroproetus	Sepkoski, 2002	Arthropoda	Trilobita		PROETIDA		O	Llde-l	S	Ldov-m	Demersal	Nektobenthos	Compact, Convex, Capable of Faster Swimming	0.75	Fortey & Owens, 1999	Absent	N/A
Astycoryphe	Sepkoski, 2002	Arthropoda	Trilobita		PROETIDA		D	Gedi	D	Give-u	Demersal	Nektobenthos	Compact, Convex, Capable of Faster Swimming	0.75	Fortey & Owens, 1999	Absent	N/A
Aulacopleura	Sepkoski, 2002	Arthropoda	Trilobita		PROETIDA		O	Trem	D	Give-u	Demersal	Nektobenthos	Compact, Convex, Capable of Faster Swimming	0.75	Fortey & Owens, 1999	Absent	N/A
Aulacopleurina	Sepkoski, 2002	Arthropoda	Trilobita		PROETIDA		D	Sieg	D	Eife	Demersal	Nektobenthos	Compact, Convex, Capable of Faster Swimming	0.75	Fortey & Owens, 1999	Absent	N/A
Australokaskia	Sepkoski, 2002	Arthropoda	Trilobita		PROETIDA		C	Tour-l	C	Tour-u	Demersal	Nektobenthos	Compact, Convex, Capable of Faster Swimming	0.75	Fortey & Owens, 1999	Absent	N/A
Australosutura	Sepkoski, 2002	Arthropoda	Trilobita		PROETIDA		C	Tour-l	C	Tour-l	Demersal	Nektobenthos	Compact, Convex, Capable of Faster Swimming	0.75	Fortey & Owens, 1999	Absent	N/A
Bailielloides	Sepkoski, 2002	Arthropoda	Trilobita		PROETIDA		D	Emsi	D	Eife	Demersal	Nektobenthos	Compact, Convex, Capable of Faster Swimming	0.75	Fortey & Owens, 1999	Absent	N/A
Bapingaspis	Sepkoski, 2002	Arthropoda	Trilobita		PROETIDA		D	Fras-u	D	Fame-u	Demersal	Nektobenthos	Compact, Convex, Capable of Faster Swimming	0.75	Fortey & Owens, 1999	Absent	N/A
Basidechenella	Sepkoski, 2002	Arthropoda	Trilobita		PROETIDA		D	Emsi-l	D	Eife	Demersal	Nektobenthos	Compact, Convex, Capable of Faster Swimming	0.75	Fortey & Owens, 1999	Absent	N/A
Bathyurellus	Sepkoski, 2002	Arthropoda	Trilobita		PROETIDA		O	Trem-u	O	Llvi-l	Demersal	Nektobenthos	Compact, Convex, Capable of Faster Swimming	0.75	Fortey & Owens, 1999	Absent	N/A
Bathyuriscops	Sepkoski, 2002	Arthropoda	Trilobita		PROETIDA		O	Aren	O	Aren	Demersal	Nektobenthos	Compact, Convex, Capable of Faster Swimming	0.75	Fortey & Owens, 1999	Absent	N/A
Bathyurus	Sepkoski, 2002	Arthropoda	Trilobita		PROETIDA		O	Llvi-l	O	Cara-m	Demersal	Nektobenthos	Compact, Convex, Capable of Faster Swimming	0.75	Fortey & Owens, 1999	Absent	N/A
Bedicella	Sepkoski, 2002	Arthropoda	Trilobita		PROETIDA		C	Step-l	P	Sakm	Demersal	Nektobenthos	Compact, Convex, Capable of Faster Swimming	0.75	Fortey & Owens, 1999	Absent	N/A
Benesovella	Sepkoski, 2002	Arthropoda	Trilobita		PROETIDA		D	Eife-l	D	Eife-l	Demersal	Nektobenthos	Compact, Convex, Capable of Faster Swimming	0.75	Fortey & Owens, 1999	Absent	N/A
Benthamaspis	Sepkoski, 2002	Arthropoda	Trilobita		PROETIDA		O	Aren-l	O	Aren-l	Demersal	Nektobenthos	Compact, Convex, Capable of Faster Swimming	0.75	Fortey & Owens, 1999	Absent	N/A
Biolgina	Sepkoski, 2002	Arthropoda	Trilobita		PROETIDA		O	Aren	O	Aren	Demersal	Nektobenthos	Compact, Convex, Capable of Faster Swimming	0.75	Fortey & Owens, 1999	Absent	N/A
Bitumulina	Sepkoski, 2002	Arthropoda	Trilobita		PROETIDA		C	Tour-l	C	Tour-l	Demersal	Nektobenthos	Compact, Convex, Capable of Faster Swimming	0.75	Fortey & Owens, 1999	Absent	N/A
Bohemiproetus	Sepkoski, 2002	Arthropoda	Trilobita		PROETIDA		D	Sieg	D	Emsi-l	Demersal	Nektobenthos	Compact, Convex, Capable of Faster Swimming	0.75	Fortey & Owens, 1999	Absent	N/A
Bojocoryphe	Sepkoski, 2002	Arthropoda	Trilobita		PROETIDA		D	Sieg	D	Sieg	Demersal	Nektobenthos	Compact, Convex, Capable of Faster Swimming	0.75	Fortey & Owens, 1999	Absent	N/A
Bolbocephalus	Sepkoski, 2002	Arthropoda	Trilobita		PROETIDA		O	Aren-l	O	Aren-l	Demersal	Nektobenthos	Compact, Convex, Capable of Faster Swimming	0.75	Fortey & Owens, 1999	Absent	N/A
Boliviproetus	Sepkoski, 2002	Arthropoda	Trilobita		PROETIDA		D	Emsi-l	D	Emsi-u	Demersal	Nektobenthos	Compact, Convex, Capable of Faster Swimming	0.75	Fortey & Owens, 1999	Absent	N/A
Bollandia	Sepkoski, 2002	Arthropoda	Trilobita		PROETIDA		C	Tour-u	C	Vise-u	Demersal	Nektobenthos	Compact, Convex, Capable of Faster Swimming	0.75	Fortey & Owens, 1999	Absent	N/A
Borealia	Sepkoski, 2002	Arthropoda	Trilobita		PROETIDA		D	Emsi-l	D	Emsi-u	Demersal	Nektobenthos	Compact, Convex, Capable of Faster Swimming	0.75	Fortey & Owens, 1999	Absent	N/A
Brachymetopus	Sepkoski, 2002	Arthropoda	Trilobita		PROETIDA		D	Fame-u	P	Guad	Demersal	Nektobenthos	Compact, Convex, Capable of Faster Swimming	0.75	Fortey & Owens, 1999	Absent	N/A
Breviphillipsia	Sepkoski, 2002	Arthropoda	Trilobita		PROETIDA		C	Tour-l	C	Tour-l	Demersal	Nektobenthos	Compact, Convex, Capable of Faster Swimming	0.75	Fortey & Owens, 1999	Absent	N/A
Buchiproetus	Sepkoski, 2002	Arthropoda	Trilobita		PROETIDA		D	Emsi-l	D	Eife	Demersal	Nektobenthos	Compact, Convex, Capable of Faster Swimming	0.75	Fortey & Owens, 1999	Absent	N/A
Calybole	Sepkoski, 2002	Arthropoda	Trilobita		PROETIDA		D	Fame-m	D	Fame-m	Demersal	Nektobenthos	Compact, Convex, Capable of Faster Swimming	0.75	Fortey & Owens, 1999	Absent	N/A
Cammingella	Sepkoski, 2002	Arthropoda	Trilobita		PROETIDA		C	Tour-l	C	l	Demersal	Nektobenthos	Compact, Convex, Capable of Faster Swimming	0.75	Fortey & Owens, 1999	Absent	N/A
Camsellia	Sepkoski, 2002	Arthropoda	Trilobita		PROETIDA		D	Eife	D	Eife	Demersal	Nektobenthos	Compact, Convex, Capable of Faster Swimming	0.75	Fortey & Owens, 1999	Absent	N/A
Carbonocoryphe	Sepkoski, 2002	Arthropoda	Trilobita		PROETIDA		C	Tour-u	C	Vise-u	Demersal	Nektobenthos	Compact, Convex, Capable of Faster Swimming	0.75	Fortey & Owens, 1999	Absent	N/A
Carbonoproetus	Sepkoski, 2002	Arthropoda	Trilobita		PROETIDA		C	Bash-l	C	Bash-l	Demersal	Nektobenthos	Compact, Convex, Capable of Faster Swimming	0.75	Fortey & Owens, 1999	Absent	N/A
Celmus	Sepkoski, 2002	Arthropoda	Trilobita		PROETIDA		O	Aren-u	O	Aren-u	Demersal	Nektobenthos	Compact, Convex, Capable of Faster Swimming	0.75	Fortey & Owens, 1999	Absent	N/A
Ceratopeltis	Sepkoski, 2002	Arthropoda	Trilobita		PROETIDA		O	Aren	O	Aren	Demersal	Nektobenthos	Compact, Convex, Capable of Faster Swimming	0.75	Fortey & Owens, 1999	Absent	N/A
Chauffouraspis	Sepkoski, 2002	Arthropoda	Trilobita		PROETIDA		D	Emsi	D	Emsi	Demersal	Nektobenthos	Compact, Convex, Capable of Faster Swimming	0.75	Fortey & Owens, 1999	Absent	N/A
Chaunoproetus	Sepkoski, 2002	Arthropoda	Trilobita		PROETIDA		D	Fame-m	D	Fame-u	Demersal	Nektobenthos	Compact, Convex, Capable of Faster Swimming	0.75	Fortey & Owens, 1999	Absent	N/A
Cheiropyge	Sepkoski, 2002	Arthropoda	Trilobita		PROETIDA		P	Sakm-u	P	Djhu	Demersal	Nektobenthos	Compact, Convex, Capable of Faster Swimming	0.75	Fortey & Owens, 1999	Absent	N/A
Chomatopyge	Sepkoski, 2002	Arthropoda	Trilobita		PROETIDA		O	Llde-u	O	Cara-l	Demersal	Nektobenthos	Compact, Convex, Capable of Faster Swimming	0.75	Fortey & Owens, 1999	Absent	N/A
Chuanqianoproetus	Sepkoski, 2002	Arthropoda	Trilobita		PROETIDA		S	Wenl-l	S	Wenl-l	Demersal	Nektobenthos	Compact, Convex, Capable of Faster Swimming	0.75	Fortey & Owens, 1999	Absent	N/A
Clavibole	Sepkoski, 2002	Arthropoda	Trilobita		PROETIDA		D	Fras	D	Fras	Demersal	Nektobenthos	Compact, Convex, Capable of Faster Swimming	0.75	Fortey & Owens, 1999	Absent	N/A
Clypoproetus	Sepkoski, 2002	Arthropoda	Trilobita		PROETIDA		O	Ashg	O	Ashg	Demersal	Nektobenthos	Compact, Convex, Capable of Faster Swimming	0.75	Fortey & Owens, 1999	Absent	N/A
Coignops	Sepkoski, 2002	Arthropoda	Trilobita		PROETIDA		C	Vise-u	C	Bash-l	Demersal	Nektobenthos	Compact, Convex, Capable of Faster Swimming	0.75	Fortey & Owens, 1999	Absent	N/A
Comptonaspis	Sepkoski, 2002	Arthropoda	Trilobita		PROETIDA		C	Tour-l	C	Tour-l	Demersal	Nektobenthos	Compact, Convex, Capable of Faster Swimming	0.75	Fortey & Owens, 1999	Absent	N/A
Coniproetus	Sepkoski, 2002	Arthropoda	Trilobita		PROETIDA		S	Prid	D	Emsi-l	Demersal	Nektobenthos	Compact, Convex, Capable of Faster Swimming	0.75	Fortey & Owens, 1999	Absent	N/A
Conophillipsia	Sepkoski, 2002	Arthropoda	Trilobita		PROETIDA		C	Tour-l	C	Vise-u	Demersal	Nektobenthos	Compact, Convex, Capable of Faster Swimming	0.75	Fortey & Owens, 1999	Absent	N/A
Constantina	Sepkoski, 2002	Arthropoda	Trilobita		PROETIDA		D	Fame-u	D	Fame-u	Demersal	Nektobenthos	Compact, Convex, Capable of Faster Swimming	0.75	Fortey & Owens, 1999	Absent	N/A
Cordania	Sepkoski, 2002	Arthropoda	Trilobita		PROETIDA		D	Gedi-l	D	Sieg	Demersal	Nektobenthos	Compact, Convex, Capable of Faster Swimming	0.75	Fortey & Owens, 1999	Absent	N/A
Cornuproetus	Sepkoski, 2002	Arthropoda	Trilobita		PROETIDA		S	Ldov-u	D	Give-u	Demersal	Nektobenthos	Compact, Convex, Capable of Faster Swimming	0.75	Fortey & Owens, 1999	Absent	N/A
Crassiproetus	Sepkoski, 2002	Arthropoda	Trilobita		PROETIDA		D	Sieg	D	Give-l	Demersal	Nektobenthos	Compact, Convex, Capable of Faster Swimming	0.75	Fortey & Owens, 1999	Absent	N/A
Cummingella	Sepkoski, 2002	Arthropoda	Trilobita		PROETIDA		C	Tour-l	P	Sakm	Demersal	Nektobenthos	Compact, Convex, Capable of Faster Swimming	0.75	Fortey & Owens, 1999	Absent	N/A
Cyamella	Sepkoski, 2002	Arthropoda	Trilobita		PROETIDA		O	Cara-u	O	Cara-u	Demersal	Nektobenthos	Compact, Convex, Capable of Faster Swimming	0.75	Fortey & Owens, 1999	Absent	N/A
Cyamops	Sepkoski, 2002	Arthropoda	Trilobita		PROETIDA		O	Cara-u	O	Ashg	Demersal	Nektobenthos	Compact, Convex, Capable of Faster Swimming	0.75	Fortey & Owens, 1999	Absent	N/A
Cyphaspides	Sepkoski, 2002	Arthropoda	Trilobita		PROETIDA		D	Sieg	D	Give-u	Demersal	Nektobenthos	Compact, Convex, Capable of Faster Swimming	0.75	Fortey & Owens, 1999	Absent	N/A
Cyphinioides	Sepkoski, 2002	Arthropoda	Trilobita		PROETIDA		C	Vise-u	C	Serp-l	Demersal	Nektobenthos	Compact, Convex, Capable of Faster Swimming	0.75	Fortey & Owens, 1999	Absent	N/A
Cyphoproetus	Sepkoski, 2002	Arthropoda	Trilobita		PROETIDA		O	Cara-m	S	Wenl-u	Demersal	Nektobenthos	Compact, Convex, Capable of Faster Swimming	0.75	Fortey & Owens, 1999	Absent	N/A
Cyrtodechenella	Sepkoski, 2002	Arthropoda	Trilobita		PROETIDA		D	Eife	D	Fras	Demersal	Nektobenthos	Compact, Convex, Capable of Faster Swimming	0.75	Fortey & Owens, 1999	Absent	N/A
Cyrtoproetus	Sepkoski, 2002	Arthropoda	Trilobita		PROETIDA		C	Tour-l	C	Vise-u	Demersal	Nektobenthos	Compact, Convex, Capable of Faster Swimming	0.75	Fortey & Owens, 1999	Absent	N/A
Cyrtosymbole	Sepkoski, 2002	Arthropoda	Trilobita		PROETIDA		D	Fame	C	Tour	Demersal	Nektobenthos	Compact, Convex, Capable of Faster Swimming	0.75	Fortey & Owens, 1999	Absent	N/A
Cyrtosymboloides	Sepkoski, 2002	Arthropoda	Trilobita		PROETIDA		D	Emsi-l	D	Eife	Demersal	Nektobenthos	Compact, Convex, Capable of Faster Swimming	0.75	Fortey & Owens, 1999	Absent	N/A
Cystispina	Sepkoski, 2002	Arthropoda	Trilobita		PROETIDA		C	Vise	C	Vise	Demersal	Nektobenthos	Compact, Convex, Capable of Faster Swimming	0.75	Fortey & Owens, 1999	Absent	N/A
Daihuaia	Sepkoski, 2002	Arthropoda	Trilobita		PROETIDA		D	Fame-m	D	Fame-u	Demersal	Nektobenthos	Compact, Convex, Capable of Faster Swimming	0.75	Fortey & Owens, 1999	Absent	N/A
Dalejeproetus	Sepkoski, 2002	Arthropoda	Trilobita		PROETIDA		D	Gedi	D	Emsi-u	Demersal	Nektobenthos	Compact, Convex, Capable of Faster Swimming	0.75	Fortey & Owens, 1999	Absent	N/A
Dechenella	Sepkoski, 2002	Arthropoda	Trilobita		PROETIDA		D	Gedi-l	D	Give-l	Demersal	Nektobenthos	Compact, Convex, Capable of Faster Swimming	0.75	Fortey & Owens, 1999	Absent	N/A
Dechenellurus	Sepkoski, 2002	Arthropoda	Trilobita		PROETIDA		D	Gedi	D	Emsi-l	Demersal	Nektobenthos	Compact, Convex, Capable of Faster Swimming	0.75	Fortey & Owens, 1999	Absent	N/A
Decoroproetus	Sepkoski, 2002	Arthropoda	Trilobita		PROETIDA		O	Aren-u	D	Emsi-l	Demersal	Nektobenthos	Compact, Convex, Capable of Faster Swimming	0.75	Fortey & Owens, 1999	Absent	N/A
Delaria	Sepkoski, 2002	Arthropoda	Trilobita		PROETIDA		P	Leon-l	P	Guad-l	Demersal	Nektobenthos	Compact, Convex, Capable of Faster Swimming	0.75	Fortey & Owens, 1999	Absent	N/A
Deltadechenella	Sepkoski, 2002	Arthropoda	Trilobita		PROETIDA		D	Eife	D	Eife	Demersal	Nektobenthos	Compact, Convex, Capable of Faster Swimming	0.75	Fortey & Owens, 1999	Absent	N/A
Denemarkia	Sepkoski, 2002	Arthropoda	Trilobita		PROETIDA		D	Sieg	D	Sieg	Demersal	Nektobenthos	Compact, Convex, Capable of Faster Swimming	0.75	Fortey & Owens, 1999	Absent	N/A
Devonocoryphe	Sepkoski, 2002	Arthropoda	Trilobita		PROETIDA		D	Fame-l	D	Fame-u	Demersal	Nektobenthos	Compact, Convex, Capable of Faster Swimming	0.75	Fortey & Owens, 1999	Absent	N/A
Devonoproetus	Sepkoski, 2002	Arthropoda	Trilobita		PROETIDA		D	Gedi-u	D	Eife-l	Demersal	Nektobenthos	Compact, Convex, Capable of Faster Swimming	0.75	Fortey & Owens, 1999	Absent	N/A
Diacoryphe	Sepkoski, 2002	Arthropoda	Trilobita		PROETIDA		C	Tour	C	Tour	Demersal	Nektobenthos	Compact, Convex, Capable of Faster Swimming	0.75	Fortey & Owens, 1999	Absent	N/A
Dimeropyge	Sepkoski, 2002	Arthropoda	Trilobita		PROETIDA		O	Llde-l	O	Ashg-u	Demersal	Nektobenthos	Compact, Convex, Capable of Faster Swimming	0.75	Fortey & Owens, 1999	Absent	N/A
Dimeropygiella	Sepkoski, 2002	Arthropoda	Trilobita		PROETIDA		O	Aren	O	Aren	Demersal	Nektobenthos	Compact, Convex, Capable of Faster Swimming	0.75	Fortey & Owens, 1999	Absent	N/A
Ditomopyge	Sepkoski, 2002	Arthropoda	Trilobita		PROETIDA		C	Bash-l	P	Guad-u	Demersal	Nektobenthos	Compact, Convex, Capable of Faster Swimming	0.75	Fortey & Owens, 1999	Absent	N/A
Dixiphopyge	Sepkoski, 2002	Arthropoda	Trilobita		PROETIDA		C	Tour-l	C	Tour-l	Demersal	Nektobenthos	Compact, Convex, Capable of Faster Swimming	0.75	Fortey & Owens, 1999	Absent	N/A
Dohmiella	Sepkoski, 2002	Arthropoda	Trilobita		PROETIDA		D	Eife-u	D	Give-u	Demersal	Nektobenthos	Compact, Convex, Capable of Faster Swimming	0.75	Fortey & Owens, 1999	Absent	N/A
Doublatia	Sepkoski, 2002	Arthropoda	Trilobita		PROETIDA		P	Sakm-u	P	Sakm-u	Demersal	Nektobenthos	Compact, Convex, Capable of Faster Swimming	0.75	Fortey & Owens, 1999	Absent	N/A
Drevermannia	Sepkoski, 2002	Arthropoda	Trilobita		PROETIDA		D	Fame	C	Tour	Demersal	Nektobenthos	Compact, Convex, Capable of Faster Swimming	0.75	Fortey & Owens, 1999	Absent	N/A
Eleutherocentrus	Sepkoski, 2002	Arthropoda	Trilobita		PROETIDA		O	Aren-u	O	Aren-u	Demersal	Nektobenthos	Compact, Convex, Capable of Faster Swimming	0.75	Fortey & Owens, 1999	Absent	N/A
Elliptophillipsia	Sepkoski, 2002	Arthropoda	Trilobita		PROETIDA		C	Tour-l	C	Tour-l	Demersal	Nektobenthos	Compact, Convex, Capable of Faster Swimming	0.75	Fortey & Owens, 1999	Absent	N/A
Endops	Sepkoski, 2002	Arthropoda	Trilobita		PROETIDA		P	Guad-u	P	Guad-u	Demersal	Nektobenthos	Compact, Convex, Capable of Faster Swimming	0.75	Fortey & Owens, 1999	Absent	N/A
Eocyphinium	Sepkoski, 2002	Arthropoda	Trilobita		PROETIDA		C	Tour-l	C	Serp-l	Demersal	Nektobenthos	Compact, Convex, Capable of Faster Swimming	0.75	Fortey & Owens, 1999	Absent	N/A
Eocyrtosymbole	Sepkoski, 2002	Arthropoda	Trilobita		PROETIDA		D	Emsi-l	D	Emsi-l	Demersal	Nektobenthos	Compact, Convex, Capable of Faster Swimming	0.75	Fortey & Owens, 1999	Absent	N/A
Eodrevermannia	Sepkoski, 2002	Arthropoda	Trilobita		PROETIDA		D	Gedi	D	Emsi-u	Demersal	Nektobenthos	Compact, Convex, Capable of Faster Swimming	0.75	Fortey & Owens, 1999	Absent	N/A
Eoproetus	Sepkoski, 2002	Arthropoda	Trilobita		PROETIDA		Cm	uMid	Cm	uMid	Demersal	Nektobenthos	Compact, Convex, Capable of Faster Swimming	0.75	Fortey & Owens, 1999	Absent	N/A
Erbenaspis	Sepkoski, 2002	Arthropoda	Trilobita		PROETIDA		D	Gedi	D	Emsi-u	Demersal	Nektobenthos	Compact, Convex, Capable of Faster Swimming	0.75	Fortey & Owens, 1999	Absent	N/A
Erbenicoryphe	Sepkoski, 2002	Arthropoda	Trilobita		PROETIDA		D	Fras-l	D	Fras-l	Demersal	Nektobenthos	Compact, Convex, Capable of Faster Swimming	0.75	Fortey & Owens, 1999	Absent	N/A
Erbenites	Sepkoski, 2002	Arthropoda	Trilobita		PROETIDA		D	Eife	D	Give-u	Demersal	Nektobenthos	Compact, Convex, Capable of Faster Swimming	0.75	Fortey & Owens, 1999	Absent	N/A
Eremiproetus	Sepkoski, 2002	Arthropoda	Trilobita		PROETIDA		S	Prid	D	Give-u	Demersal	Nektobenthos	Compact, Convex, Capable of Faster Swimming	0.75	Fortey & Owens, 1999	Absent	N/A
Eudechella	Sepkoski, 2002	Arthropoda	Trilobita		PROETIDA		D	Give	D	Give	Demersal	Nektobenthos	Compact, Convex, Capable of Faster Swimming	0.75	Fortey & Owens, 1999	Absent	N/A
Evagena	Sepkoski, 2002	Arthropoda	Trilobita		PROETIDA		C	Vise	C	Vise	Demersal	Nektobenthos	Compact, Convex, Capable of Faster Swimming	0.75	Fortey & Owens, 1999	Absent	N/A
Exochops	Sepkoski, 2002	Arthropoda	Trilobita		PROETIDA		C	Vise-l	C	Vise-l	Demersal	Nektobenthos	Compact, Convex, Capable of Faster Swimming	0.75	Fortey & Owens, 1999	Absent	N/A
Falcatoproetus	Sepkoski, 2002	Arthropoda	Trilobita		PROETIDA		S	Wenl	S	Ludl-l	Demersal	Nektobenthos	Compact, Convex, Capable of Faster Swimming	0.75	Fortey & Owens, 1999	Absent	N/A
Formonia	Sepkoski, 2002	Arthropoda	Trilobita		PROETIDA		D	Fame-l	D	Fame-l	Demersal	Nektobenthos	Compact, Convex, Capable of Faster Swimming	0.75	Fortey & Owens, 1999	Absent	N/A
Frithjofia	Sepkoski, 2002	Arthropoda	Trilobita		PROETIDA		D	Fame-l	D	Fame-u	Demersal	Nektobenthos	Compact, Convex, Capable of Faster Swimming	0.75	Fortey & Owens, 1999	Absent	N/A
Fuscinipyge	Sepkoski, 2002	Arthropoda	Trilobita		PROETIDA		D	Eife	D	Eife	Demersal	Nektobenthos	Compact, Convex, Capable of Faster Swimming	0.75	Fortey & Owens, 1999	Absent	N/A
Ganinella	Sepkoski, 2002	Arthropoda	Trilobita		PROETIDA		D	Gedi-l	D	Eife	Demersal	Nektobenthos	Compact, Convex, Capable of Faster Swimming	0.75	Fortey & Owens, 1999	Absent	N/A
Gapeevella	Sepkoski, 2002	Arthropoda	Trilobita		PROETIDA		C	Vise-u	C	Serp-l	Demersal	Nektobenthos	Compact, Convex, Capable of Faster Swimming	0.75	Fortey & Owens, 1999	Absent	N/A
Gerastes	Sepkoski, 2002	Arthropoda	Trilobita		PROETIDA		D	Gedi	D	Give-l	Demersal	Nektobenthos	Compact, Convex, Capable of Faster Swimming	0.75	Fortey & Owens, 1999	Absent	N/A
Gitarra	Sepkoski, 2002	Arthropoda	Trilobita		PROETIDA		C	Tour-u	C	Vise-l	Demersal	Nektobenthos	Compact, Convex, Capable of Faster Swimming	0.75	Fortey & Owens, 1999	Absent	N/A
Glaphurella	Sepkoski, 2002	Arthropoda	Trilobita		PROETIDA		O	Ashg-m	O	Ashg-m	Demersal	Nektobenthos	Compact, Convex, Capable of Faster Swimming	0.75	Fortey & Owens, 1999	Absent	N/A
Glaphurina	Sepkoski, 2002	Arthropoda	Trilobita		PROETIDA		O	Llde	O	Llde	Demersal	Nektobenthos	Compact, Convex, Capable of Faster Swimming	0.75	Fortey & Owens, 1999	Absent	N/A
Glaphurus	Sepkoski, 2002	Arthropoda	Trilobita		PROETIDA		O	Trem	O	Cara-l	Demersal	Nektobenthos	Compact, Convex, Capable of Faster Swimming	0.75	Fortey & Owens, 1999	Absent	N/A
Globusia	Sepkoski, 2002	Arthropoda	Trilobita		PROETIDA		C	Tour	C	Tour	Demersal	Nektobenthos	Compact, Convex, Capable of Faster Swimming	0.75	Fortey & Owens, 1999	Absent	N/A
Goniophrys	Sepkoski, 2002	Arthropoda	Trilobita		PROETIDA		O	Aren-l	O	Llvi-l	Planktic	Nektoplankton	Hypertrophied Eyes, Poorly Streamlined	0.75	Fortey, 1985	Absent	N/A
Goniotelina	Sepkoski, 2002	Arthropoda	Trilobita		PROETIDA		O	Aren-l	O	Llvi-l	Demersal	Nektobenthos	Compact, Convex, Capable of Faster Swimming	0.75	Fortey & Owens, 1999	Absent	N/A
Gracemerea	Sepkoski, 2002	Arthropoda	Trilobita		PROETIDA		C	Vise-l	C	Vise-l	Demersal	Nektobenthos	Compact, Convex, Capable of Faster Swimming	0.75	Fortey & Owens, 1999	Absent	N/A
Griffithidella	Sepkoski, 2002	Arthropoda	Trilobita		PROETIDA		C	Tour-l	C	Tour-u	Demersal	Nektobenthos	Compact, Convex, Capable of Faster Swimming	0.75	Fortey & Owens, 1999	Absent	N/A
Griffithides	Sepkoski, 2002	Arthropoda	Trilobita		PROETIDA		C	Tour-l	C	Step-l	Demersal	Nektobenthos	Compact, Convex, Capable of Faster Swimming	0.75	Fortey & Owens, 1999	Absent	N/A
Grinnellaspis	Sepkoski, 2002	Arthropoda	Trilobita		PROETIDA		O	Aren-l	O	Aren-l	Demersal	Nektobenthos	Compact, Convex, Capable of Faster Swimming	0.75	Fortey & Owens, 1999	Absent	N/A
Haasia	Sepkoski, 2002	Arthropoda	Trilobita		PROETIDA		D	Fame-u	D	Fame-u	Demersal	Nektobenthos	Compact, Convex, Capable of Faster Swimming	0.75	Fortey & Owens, 1999	Absent	N/A
Hamiroproetus	Sepkoski, 2002	Arthropoda	Trilobita		PROETIDA		D	Sieg	D	Emsi-l	Demersal	Nektobenthos	Compact, Convex, Capable of Faster Swimming	0.75	Fortey & Owens, 1999	Absent	N/A
Hanjiangaspis	Sepkoski, 2002	Arthropoda	Trilobita		PROETIDA		O	Cara-u	O	Cara-u	Demersal	Nektobenthos	Compact, Convex, Capable of Faster Swimming	0.75	Fortey & Owens, 1999	Absent	N/A
Harpidella	Sepkoski, 2002	Arthropoda	Trilobita		PROETIDA		O	Cara-l	D	Give	Demersal	Nektobenthos	Compact, Convex, Capable of Faster Swimming	0.75	Fortey & Owens, 1999	Absent	N/A
Hedstroemia	Sepkoski, 2002	Arthropoda	Trilobita		PROETIDA		S	Ldov-u	D	Gedi	Demersal	Nektobenthos	Compact, Convex, Capable of Faster Swimming	0.75	Fortey & Owens, 1999	Absent	N/A
Helioproetoides	Sepkoski, 2002	Arthropoda	Trilobita		PROETIDA		D	Fame-m	D	Fame-m	Demersal	Nektobenthos	Compact, Convex, Capable of Faster Swimming	0.75	Fortey & Owens, 1999	Absent	N/A
Helioproetus	Sepkoski, 2002	Arthropoda	Trilobita		PROETIDA		D	Fame-u	D	Fame-u	Demersal	Nektobenthos	Compact, Convex, Capable of Faster Swimming	0.75	Fortey & Owens, 1999	Absent	N/A
Hentigia	Sepkoski, 2002	Arthropoda	Trilobita		PROETIDA		P	Leon	P	Leon	Demersal	Nektobenthos	Compact, Convex, Capable of Faster Swimming	0.75	Fortey & Owens, 1999	Absent	N/A
Hildaphillipsia	Sepkoski, 2002	Arthropoda	Trilobita		PROETIDA		P	Guad-u	P	Guad-u	Demersal	Nektobenthos	Compact, Convex, Capable of Faster Swimming	0.75	Fortey & Owens, 1999	Absent	N/A
Hillyardina	Sepkoski, 2002	Arthropoda	Trilobita		PROETIDA		O	Trem-u	O	Trem-u	Demersal	Nektobenthos	Compact, Convex, Capable of Faster Swimming	0.75	Fortey & Owens, 1999	Absent	N/A
Hollardia	Sepkoski, 2002	Arthropoda	Trilobita		PROETIDA		D	Gedi	D	Sieg	Demersal	Nektobenthos	Compact, Convex, Capable of Faster Swimming	0.75	Fortey & Owens, 1999	Absent	N/A
Holotrachelus	Sepkoski, 2002	Arthropoda	Trilobita		PROETIDA		O	Cara-m	O	Ashg-u	Demersal	Nektobenthos	Compact, Convex, Capable of Faster Swimming	0.75	Fortey & Owens, 1999	Absent	N/A
Humeia	Sepkoski, 2002	Arthropoda	Trilobita		PROETIDA		D	Eife	D	Eife	Demersal	Nektobenthos	Compact, Convex, Capable of Faster Swimming	0.75	Fortey & Owens, 1999	Absent	N/A
Humilogriffithides	Sepkoski, 2002	Arthropoda	Trilobita		PROETIDA		C	Mosc	C	Mosc	Demersal	Nektobenthos	Compact, Convex, Capable of Faster Swimming	0.75	Fortey & Owens, 1999	Absent	N/A
Hypaproetus	Sepkoski, 2002	Arthropoda	Trilobita		PROETIDA		S	Ldov-m	S	Ldov-m	Demersal	Nektobenthos	Compact, Convex, Capable of Faster Swimming	0.75	Fortey & Owens, 1999	Absent	N/A
Hystricurus	Sepkoski, 2002	Arthropoda	Trilobita		PROETIDA		O	Trem-l	O	Trem-u	Demersal	Nektobenthos	Compact, Convex, Capable of Faster Swimming	0.75	Fortey & Owens, 1999	Absent	N/A
Ignoproetus	Sepkoski, 2002	Arthropoda	Trilobita		PROETIDA		D	Emsi-u	D	Eife	Demersal	Nektobenthos	Compact, Convex, Capable of Faster Swimming	0.75	Fortey & Owens, 1999	Absent	N/A
Interproetus	Sepkoski, 2002	Arthropoda	Trilobita		PROETIDA		S	Wenl-l	S	Ludl	Demersal	Nektobenthos	Compact, Convex, Capable of Faster Swimming	0.75	Fortey & Owens, 1999	Absent	N/A
Iranaspidion	Sepkoski, 2002	Arthropoda	Trilobita		PROETIDA		P	Guad-u	P	Guad-u	Demersal	Nektobenthos	Compact, Convex, Capable of Faster Swimming	0.75	Fortey & Owens, 1999	Absent	N/A
Ischyrophyma	Sepkoski, 2002	Arthropoda	Trilobita		PROETIDA		O	Aren-l	O	Llvi-l	Demersal	Nektobenthos	Compact, Convex, Capable of Faster Swimming	0.75	Fortey & Owens, 1999	Absent	N/A
Ischyrotoma	Sepkoski, 2002	Arthropoda	Trilobita		PROETIDA		O	Aren-l	O	Llvi-u	Demersal	Nektobenthos	Compact, Convex, Capable of Faster Swimming	0.75	Fortey & Owens, 1999	Absent	N/A
Jeffersonia	Sepkoski, 2002	Arthropoda	Trilobita		PROETIDA		O	Trem-u	O	Aren-l	Demersal	Nektobenthos	Compact, Convex, Capable of Faster Swimming	0.75	Fortey & Owens, 1999	Absent	N/A
Jimbokranion	Sepkoski, 2002	Arthropoda	Trilobita		PROETIDA		P	m	P	m	Demersal	Nektobenthos	Compact, Convex, Capable of Faster Swimming	0.75	Fortey & Owens, 1999	Absent	N/A
Karginella	Sepkoski, 2002	Arthropoda	Trilobita		PROETIDA		C	Serp-l	C	Serp-l	Demersal	Nektobenthos	Compact, Convex, Capable of Faster Swimming	0.75	Fortey & Owens, 1999	Absent	N/A
Kaskia	Sepkoski, 2002	Arthropoda	Trilobita		PROETIDA		C	Vise	C	Bash	Demersal	Nektobenthos	Compact, Convex, Capable of Faster Swimming	0.75	Fortey & Owens, 1999	Absent	N/A
Kathwaia	Sepkoski, 2002	Arthropoda	Trilobita		PROETIDA		P	Guad-u	P	Djhu	Demersal	Nektobenthos	Compact, Convex, Capable of Faster Swimming	0.75	Fortey & Owens, 1999	Absent	N/A
Kegeliella	Sepkoski, 2002	Arthropoda	Trilobita		PROETIDA		D	Sieg-u	D	Emsi-l	Demersal	Nektobenthos	Compact, Convex, Capable of Faster Swimming	0.75	Fortey & Owens, 1999	Absent	N/A
Khalfinella	Sepkoski, 2002	Arthropoda	Trilobita		PROETIDA		D	Gedi-l	D	Eife	Demersal	Nektobenthos	Compact, Convex, Capable of Faster Swimming	0.75	Fortey & Owens, 1999	Absent	N/A
Kolymoproetus	Sepkoski, 2002	Arthropoda	Trilobita		PROETIDA		D	Sieg	D	Sieg	Demersal	Nektobenthos	Compact, Convex, Capable of Faster Swimming	0.75	Fortey & Owens, 1999	Absent	N/A
Koneprusites	Sepkoski, 2002	Arthropoda	Trilobita		PROETIDA		D	Emsi-u	D	Give-l	Demersal	Nektobenthos	Compact, Convex, Capable of Faster Swimming	0.75	Fortey & Owens, 1999	Absent	N/A
Kulmiella	Sepkoski, 2002	Arthropoda	Trilobita		PROETIDA		C	Vise-u	C	Vise-u	Demersal	Nektobenthos	Compact, Convex, Capable of Faster Swimming	0.75	Fortey & Owens, 1999	Absent	N/A
Lacunoporaspis	Sepkoski, 2002	Arthropoda	Trilobita		PROETIDA		S	Ldov-u	D	Eife-l	Demersal	Nektobenthos	Compact, Convex, Capable of Faster Swimming	0.75	Fortey & Owens, 1999	Absent	N/A
Langgonbole	Sepkoski, 2002	Arthropoda	Trilobita		PROETIDA		D	Fame	D	Fame	Demersal	Nektobenthos	Compact, Convex, Capable of Faster Swimming	0.75	Fortey & Owens, 1999	Absent	N/A
Lasarchopyge	Sepkoski, 2002	Arthropoda	Trilobita		PROETIDA		O	Llvi	O	Cara-l	Demersal	Nektobenthos	Compact, Convex, Capable of Faster Swimming	0.75	Fortey & Owens, 1999	Absent	N/A
Lecanopyge	Sepkoski, 2002	Arthropoda	Trilobita		PROETIDA		Cm	Trep	Cm	Trep	Demersal	Nektobenthos	Compact, Convex, Capable of Faster Swimming	0.75	Fortey & Owens, 1999	Absent	N/A
Lepidoproetus	Sepkoski, 2002	Arthropoda	Trilobita		PROETIDA		D	Gedi	D	Emsi-l	Demersal	Nektobenthos	Compact, Convex, Capable of Faster Swimming	0.75	Fortey & Owens, 1999	Absent	N/A
Lichnocephala	Sepkoski, 2002	Arthropoda	Trilobita		PROETIDA		O	Trem-u	O	Trem-u	Demersal	Nektobenthos	Compact, Convex, Capable of Faster Swimming	0.75	Fortey & Owens, 1999	Absent	N/A
Linguaphillipsia	Sepkoski, 2002	Arthropoda	Trilobita		PROETIDA		C	Tour-l	C	Vise-u	Demersal	Nektobenthos	Compact, Convex, Capable of Faster Swimming	0.75	Fortey & Owens, 1999	Absent	N/A
Linguaproetus	Sepkoski, 2002	Arthropoda	Trilobita		PROETIDA		D	Eife	D	Eife	Demersal	Nektobenthos	Compact, Convex, Capable of Faster Swimming	0.75	Fortey & Owens, 1999	Absent	N/A
Liobole	Sepkoski, 2002	Arthropoda	Trilobita		PROETIDA		C	Vise-u	C	Vise-u	Demersal	Nektobenthos	Compact, Convex, Capable of Faster Swimming	0.75	Fortey & Owens, 1999	Absent	N/A
Liobolina	Sepkoski, 2002	Arthropoda	Trilobita		PROETIDA		C	Tour-l	C	Vise-l	Demersal	Nektobenthos	Compact, Convex, Capable of Faster Swimming	0.75	Fortey & Owens, 1999	Absent	N/A
Loeipyge	Sepkoski, 2002	Arthropoda	Trilobita		PROETIDA		C	Bash-u	P	Sakm	Demersal	Nektobenthos	Compact, Convex, Capable of Faster Swimming	0.75	Fortey & Owens, 1999	Absent	N/A
Longiproetus	Sepkoski, 2002	Arthropoda	Trilobita		PROETIDA		D	Eife-u	D	Give-u	Demersal	Nektobenthos	Compact, Convex, Capable of Faster Swimming	0.75	Fortey & Owens, 1999	Absent	N/A
Lutesvillia	Sepkoski, 2002	Arthropoda	Trilobita		PROETIDA		O	Aren-l	O	Aren-l	Demersal	Nektobenthos	Compact, Convex, Capable of Faster Swimming	0.75	Fortey & Owens, 1999	Absent	N/A
Macroblepharum	Sepkoski, 2002	Arthropoda	Trilobita		PROETIDA		D	Emsi-l	D	Eife	Demersal	Nektobenthos	Compact, Convex, Capable of Faster Swimming	0.75	Fortey & Owens, 1999	Absent	N/A
Madaraspis	Sepkoski, 2002	Arthropoda	Trilobita		PROETIDA		O	Llvi-l	O	Llvi-l	Demersal	Nektobenthos	Compact, Convex, Capable of Faster Swimming	0.75	Fortey & Owens, 1999	Absent	N/A
Madygenia	Sepkoski, 2002	Arthropoda	Trilobita		PROETIDA		O	Ashg-l	O	Ashg-l	Demersal	Nektobenthos	Compact, Convex, Capable of Faster Swimming	0.75	Fortey & Owens, 1999	Absent	N/A
Mannopyge	Sepkoski, 2002	Arthropoda	Trilobita		PROETIDA		D	Emsi-u	D	Emsi-u	Demersal	Nektobenthos	Compact, Convex, Capable of Faster Swimming	0.75	Fortey & Owens, 1999	Absent	N/A
Maurotarion	Sepkoski, 2002	Arthropoda	Trilobita		PROETIDA		O	Ashg	D	Give	Demersal	Nektobenthos	Compact, Convex, Capable of Faster Swimming	0.75	Fortey & Owens, 1999	Absent	N/A
Merebolina	Sepkoski, 2002	Arthropoda	Trilobita		PROETIDA		C	Serp	C	Serp	Demersal	Nektobenthos	Compact, Convex, Capable of Faster Swimming	0.75	Fortey & Owens, 1999	Absent	N/A
Mesotaphraspis	Sepkoski, 2002	Arthropoda	Trilobita		PROETIDA		O	Llde-l	O	Cara-u	Demersal	Nektobenthos	Compact, Convex, Capable of Faster Swimming	0.75	Fortey & Owens, 1999	Absent	N/A
Microphillipsia	Sepkoski, 2002	Arthropoda	Trilobita		PROETIDA		P	Guad-u	P	Guad-u	Demersal	Nektobenthos	Compact, Convex, Capable of Faster Swimming	0.75	Fortey & Owens, 1999	Absent	N/A
Mirabole	Sepkoski, 2002	Arthropoda	Trilobita		PROETIDA		D	Fame-u	D	Fame-u	Demersal	Nektobenthos	Compact, Convex, Capable of Faster Swimming	0.75	Fortey & Owens, 1999	Absent	N/A
Miriproetus	Sepkoski, 2002	Arthropoda	Trilobita		PROETIDA		D	Sieg	D	Sieg	Demersal	Nektobenthos	Compact, Convex, Capable of Faster Swimming	0.75	Fortey & Owens, 1999	Absent	N/A
Monodechella	Sepkoski, 2002	Arthropoda	Trilobita		PROETIDA		D	Give-l	D	Give-l	Demersal	Nektobenthos	Compact, Convex, Capable of Faster Swimming	0.75	Fortey & Owens, 1999	Absent	N/A
Monodechenella	Sepkoski, 2002	Arthropoda	Trilobita		PROETIDA		D	Eife	D	Eife	Demersal	Nektobenthos	Compact, Convex, Capable of Faster Swimming	0.75	Fortey & Owens, 1999	Absent	N/A
Moravocoryphe	Sepkoski, 2002	Arthropoda	Trilobita		PROETIDA		D	Emsi-u	D	Emsi-u	Demersal	Nektobenthos	Compact, Convex, Capable of Faster Swimming	0.75	Fortey & Owens, 1999	Absent	N/A
Moschoglossis	Sepkoski, 2002	Arthropoda	Trilobita		PROETIDA		C	Tour-u	C	Tour-u	Demersal	Nektobenthos	Compact, Convex, Capable of Faster Swimming	0.75	Fortey & Owens, 1999	Absent	N/A
Myoproetus	Sepkoski, 2002	Arthropoda	Trilobita		PROETIDA		D	Emsi-u	D	Eife	Demersal	Nektobenthos	Compact, Convex, Capable of Faster Swimming	0.75	Fortey & Owens, 1999	Absent	N/A
Mystrocephala	Sepkoski, 2002	Arthropoda	Trilobita		PROETIDA		D	Emsi-u	D	Give-l	Demersal	Nektobenthos	Compact, Convex, Capable of Faster Swimming	0.75	Fortey & Owens, 1999	Absent	N/A
Nagaproetus	Sepkoski, 2002	Arthropoda	Trilobita		PROETIDA		D	Sieg	D	Eife	Demersal	Nektobenthos	Compact, Convex, Capable of Faster Swimming	0.75	Fortey & Owens, 1999	Absent	N/A
Namuropyge	Sepkoski, 2002	Arthropoda	Trilobita		PROETIDA		C	Tour-l	C	Bash-u	Demersal	Nektobenthos	Compact, Convex, Capable of Faster Swimming	0.75	Fortey & Owens, 1999	Absent	N/A
Neogriffithides	Sepkoski, 2002	Arthropoda	Trilobita		PROETIDA		C	Bash-u	P	Guad-u	Demersal	Nektobenthos	Compact, Convex, Capable of Faster Swimming	0.75	Fortey & Owens, 1999	Absent	N/A
Neoproetus	Sepkoski, 2002	Arthropoda	Trilobita		PROETIDA		C	Bash-u	P	Guad-u	Demersal	Nektobenthos	Compact, Convex, Capable of Faster Swimming	0.75	Fortey & Owens, 1999	Absent	N/A
Niachangella	Sepkoski, 2002	Arthropoda	Trilobita		PROETIDA		O	Ashg-u	O	Ashg-u	Demersal	Nektobenthos	Compact, Convex, Capable of Faster Swimming	0.75	Fortey & Owens, 1999	Absent	N/A
Nipponaspis	Sepkoski, 2002	Arthropoda	Trilobita		PROETIDA		C	Bash-u	P	Djhu	Demersal	Nektobenthos	Compact, Convex, Capable of Faster Swimming	0.75	Fortey & Owens, 1999	Absent	N/A
Novoameura	Sepkoski, 2002	Arthropoda	Trilobita		PROETIDA		P	Guad-l	P	Guad-l	Demersal	Nektobenthos	Compact, Convex, Capable of Faster Swimming	0.75	Fortey & Owens, 1999	Absent	N/A
Oehlertia	Sepkoski, 2002	Arthropoda	Trilobita		PROETIDA		D	Emsi	D	Emsi	Demersal	Nektobenthos	Compact, Convex, Capable of Faster Swimming	0.75	Fortey & Owens, 1999	Absent	N/A
Oenonella	Sepkoski, 2002	Arthropoda	Trilobita		PROETIDA		O	Aren-u	O	Aren-u	Demersal	Nektobenthos	Compact, Convex, Capable of Faster Swimming	0.75	Fortey & Owens, 1999	Absent	N/A
Oidaloproetus	Sepkoski, 2002	Arthropoda	Trilobita		PROETIDA		S	Ldov-m	S	Ldov-m	Demersal	Nektobenthos	Compact, Convex, Capable of Faster Swimming	0.75	Fortey & Owens, 1999	Absent	N/A
Orbitoproetus	Sepkoski, 2002	Arthropoda	Trilobita		PROETIDA		D	Gedi	D	Give-u	Demersal	Nektobenthos	Compact, Convex, Capable of Faster Swimming	0.75	Fortey & Owens, 1999	Absent	N/A
Ormistoniella	Sepkoski, 2002	Arthropoda	Trilobita		PROETIDA		D	Emsi-u	D	Eife	Demersal	Nektobenthos	Compact, Convex, Capable of Faster Swimming	0.75	Fortey & Owens, 1999	Absent	N/A
Otarion	Sepkoski, 2002	Arthropoda	Trilobita		PROETIDA		S	Wenl-l	D	Eife	Demersal	Nektobenthos	Compact, Convex, Capable of Faster Swimming	0.75	Fortey & Owens, 1999	Absent	N/A
Otarionella	Sepkoski, 2002	Arthropoda	Trilobita		PROETIDA		D	Gedi	D	Eife-u	Demersal	Nektobenthos	Compact, Convex, Capable of Faster Swimming	0.75	Fortey & Owens, 1999	Absent	N/A
Otarionides	Sepkoski, 2002	Arthropoda	Trilobita		PROETIDA		D	Sieg	D	Sieg	Demersal	Nektobenthos	Compact, Convex, Capable of Faster Swimming	0.75	Fortey & Owens, 1999	Absent	N/A
Pachycranium	Sepkoski, 2002	Arthropoda	Trilobita		PROETIDA		O	Trem-u	O	Trem-u	Demersal	Nektobenthos	Compact, Convex, Capable of Faster Swimming	0.75	Fortey & Owens, 1999	Absent	N/A
Pachyproetus	Sepkoski, 2002	Arthropoda	Trilobita		PROETIDA		S	Prid	S	Prid	Demersal	Nektobenthos	Compact, Convex, Capable of Faster Swimming	0.75	Fortey & Owens, 1999	Absent	N/A
Paladin	Sepkoski, 2002	Arthropoda	Trilobita		PROETIDA		C	Vise-l	P	Guad	Demersal	Nektobenthos	Compact, Convex, Capable of Faster Swimming	0.75	Fortey & Owens, 1999	Absent	N/A
Palpebralia	Sepkoski, 2002	Arthropoda	Trilobita		PROETIDA		D	Fras	D	Fras	Demersal	Nektobenthos	Compact, Convex, Capable of Faster Swimming	0.75	Fortey & Owens, 1999	Absent	N/A
Panarchaegonus	Sepkoski, 2002	Arthropoda	Trilobita		PROETIDA		O	Llde-l	O	Ashg-m	Demersal	Nektobenthos	Compact, Convex, Capable of Faster Swimming	0.75	Fortey & Owens, 1999	Absent	N/A
Parachaunoproetus	Sepkoski, 2002	Arthropoda	Trilobita		PROETIDA		D	Fame-u	D	Fame-u	Demersal	Nektobenthos	Compact, Convex, Capable of Faster Swimming	0.75	Fortey & Owens, 1999	Absent	N/A
Paradechenella	Sepkoski, 2002	Arthropoda	Trilobita		PROETIDA		D	Emsi-u	D	Give	Demersal	Nektobenthos	Compact, Convex, Capable of Faster Swimming	0.75	Fortey & Owens, 1999	Absent	N/A
Parafrithjofia	Sepkoski, 2002	Arthropoda	Trilobita		PROETIDA		D	Fame-m	D	Fame-u	Demersal	Nektobenthos	Compact, Convex, Capable of Faster Swimming	0.75	Fortey & Owens, 1999	Absent	N/A
Parahystricurus	Sepkoski, 2002	Arthropoda	Trilobita		PROETIDA		O	Trem-l	O	Aren-u	Demersal	Nektobenthos	Compact, Convex, Capable of Faster Swimming	0.75	Fortey & Owens, 1999	Absent	N/A
Parapalebralia	Sepkoski, 2002	Arthropoda	Trilobita		PROETIDA		D	Emsi-u	D	Emsi-u	Demersal	Nektobenthos	Compact, Convex, Capable of Faster Swimming	0.75	Fortey & Owens, 1999	Absent	N/A
Paraphillipsia	Sepkoski, 2002	Arthropoda	Trilobita		PROETIDA		P	Asse	P	Djhu	Demersal	Nektobenthos	Compact, Convex, Capable of Faster Swimming	0.75	Fortey & Owens, 1999	Absent	N/A
Paraphillipsinella	Sepkoski, 2002	Arthropoda	Trilobita		PROETIDA		O	Cara-u	O	Cara-u	Demersal	Nektobenthos	Compact, Convex, Capable of Faster Swimming	0.75	Fortey & Owens, 1999	Absent	N/A
Paraproetus	Sepkoski, 2002	Arthropoda	Trilobita		PROETIDA		O	Ashg-m	O	Ashg-m	Demersal	Nektobenthos	Compact, Convex, Capable of Faster Swimming	0.75	Fortey & Owens, 1999	Absent	N/A
Paratoernquistia	Sepkoski, 2002	Arthropoda	Trilobita		PROETIDA		O	Cara-l	O	Cara-m	Demersal	Nektobenthos	Compact, Convex, Capable of Faster Swimming	0.75	Fortey & Owens, 1999	Absent	N/A
Parawarburgella	Sepkoski, 2002	Arthropoda	Trilobita		PROETIDA		D	Gedi	D	Gedi	Demersal	Nektobenthos	Compact, Convex, Capable of Faster Swimming	0.75	Fortey & Owens, 1999	Absent	N/A
Particeps	Sepkoski, 2002	Arthropoda	Trilobita		PROETIDA		C	Tour-u	C	Serp-l	Demersal	Nektobenthos	Compact, Convex, Capable of Faster Swimming	0.75	Fortey & Owens, 1999	Absent	N/A
Parvigena	Sepkoski, 2002	Arthropoda	Trilobita		PROETIDA		O	Cara-u	O	Ashg-m	Demersal	Nektobenthos	Compact, Convex, Capable of Faster Swimming	0.75	Fortey & Owens, 1999	Absent	N/A
Paryfenus	Sepkoski, 2002	Arthropoda	Trilobita		PROETIDA		O	Llvi	O	Llvi	Demersal	Nektobenthos	Compact, Convex, Capable of Faster Swimming	0.75	Fortey & Owens, 1999	Absent	N/A
Pedinodechenella	Sepkoski, 2002	Arthropoda	Trilobita		PROETIDA		D	Eife	D	Eife	Demersal	Nektobenthos	Compact, Convex, Capable of Faster Swimming	0.75	Fortey & Owens, 1999	Absent	N/A
Peltabellia	Sepkoski, 2002	Arthropoda	Trilobita		PROETIDA		O	Trem-u	O	Llvi-l	Demersal	Nektobenthos	Compact, Convex, Capable of Faster Swimming	0.75	Fortey & Owens, 1999	Absent	N/A
Perakaspis	Sepkoski, 2002	Arthropoda	Trilobita		PROETIDA		D	Emsi-u	D	Eife	Demersal	Nektobenthos	Compact, Convex, Capable of Faster Swimming	0.75	Fortey & Owens, 1999	Absent	N/A
Perliproetus	Sepkoski, 2002	Arthropoda	Trilobita		PROETIDA		D	Fame-u	D	Fame-u	Demersal	Nektobenthos	Compact, Convex, Capable of Faster Swimming	0.75	Fortey & Owens, 1999	Absent	N/A
Petigurus	Sepkoski, 2002	Arthropoda	Trilobita		PROETIDA		O	Aren-l	O	Llvi-l	Demersal	Nektobenthos	Compact, Convex, Capable of Faster Swimming	0.75	Fortey & Owens, 1999	Absent	N/A
Phaetonellus	Sepkoski, 2002	Arthropoda	Trilobita		PROETIDA		O	?	D	Give	Demersal	Nektobenthos	Compact, Convex, Capable of Faster Swimming	0.75	Fortey & Owens, 1999	Absent	N/A
Phaselops	Sepkoski, 2002	Arthropoda	Trilobita		PROETIDA		O	Llvi-l	O	Llde	Demersal	Nektobenthos	Compact, Convex, Capable of Faster Swimming	0.75	Fortey & Owens, 1999	Absent	N/A
Phillibole	Sepkoski, 2002	Arthropoda	Trilobita		PROETIDA		C	Tour-u	C	Tour-u	Demersal	Nektobenthos	Compact, Convex, Capable of Faster Swimming	0.75	Fortey & Owens, 1999	Absent	N/A
Phillibolina	Sepkoski, 2002	Arthropoda	Trilobita		PROETIDA		C	Vise-l	C	Vise-l	Demersal	Nektobenthos	Compact, Convex, Capable of Faster Swimming	0.75	Fortey & Owens, 1999	Absent	N/A
Phillipsia	Sepkoski, 2002	Arthropoda	Trilobita		PROETIDA		C	Tour-l	C	Vise-l	Demersal	Nektobenthos	Compact, Convex, Capable of Faster Swimming	0.75	Fortey & Owens, 1999	Absent	N/A
Phyllaspis	Sepkoski, 2002	Arthropoda	Trilobita		PROETIDA		D	Sieg	D	Emsi-u	Demersal	Nektobenthos	Compact, Convex, Capable of Faster Swimming	0.75	Fortey & Owens, 1999	Absent	N/A
Piltonia	Sepkoski, 2002	Arthropoda	Trilobita		PROETIDA		C	Tour-l	C	Tour-u	Demersal	Nektobenthos	Compact, Convex, Capable of Faster Swimming	0.75	Fortey & Owens, 1999	Absent	N/A
Piriproetus	Sepkoski, 2002	Arthropoda	Trilobita		PROETIDA		D	Emsi-u	D	Eife	Demersal	Nektobenthos	Compact, Convex, Capable of Faster Swimming	0.75	Fortey & Owens, 1999	Absent	N/A
Platyantyx	Sepkoski, 2002	Arthropoda	Trilobita		PROETIDA		O	Llvi	O	Llvi	Demersal	Nektobenthos	Compact, Convex, Capable of Faster Swimming	0.75	Fortey & Owens, 1999	Absent	N/A
Podoliproetus	Sepkoski, 2002	Arthropoda	Trilobita		PROETIDA		D	Sieg	D	Emsi-l	Demersal	Nektobenthos	Compact, Convex, Capable of Faster Swimming	0.75	Fortey & Owens, 1999	Absent	N/A
Pontipalpebralia	Sepkoski, 2002	Arthropoda	Trilobita		PROETIDA		D	Fame	D	Fame	Demersal	Nektobenthos	Compact, Convex, Capable of Faster Swimming	0.75	Fortey & Owens, 1999	Absent	N/A
Praedechenella	Sepkoski, 2002	Arthropoda	Trilobita		PROETIDA		D	Sieg	D	Emsi-u	Demersal	Nektobenthos	Compact, Convex, Capable of Faster Swimming	0.75	Fortey & Owens, 1999	Absent	N/A
Pragoproetus	Sepkoski, 2002	Arthropoda	Trilobita		PROETIDA		D	Gedi-u	D	Sieg	Demersal	Nektobenthos	Compact, Convex, Capable of Faster Swimming	0.75	Fortey & Owens, 1999	Absent	N/A
Prantlia	Sepkoski, 2002	Arthropoda	Trilobita		PROETIDA		S	Ldov-u	D	Gedi	Demersal	Nektobenthos	Compact, Convex, Capable of Faster Swimming	0.75	Fortey & Owens, 1999	Absent	N/A
Pribylia	Sepkoski, 2002	Arthropoda	Trilobita		PROETIDA		D	Sieg	D	Sieg	Demersal	Nektobenthos	Compact, Convex, Capable of Faster Swimming	0.75	Fortey & Owens, 1999	Absent	N/A
Prionopeltis	Sepkoski, 2002	Arthropoda	Trilobita		PROETIDA		S	Prid	D	Gedi-l	Demersal	Nektobenthos	Compact, Convex, Capable of Faster Swimming	0.75	Fortey & Owens, 1999	Absent	N/A
Prodiacoryphe	Sepkoski, 2002	Arthropoda	Trilobita		PROETIDA		D	Fame-m	D	Fame-m	Demersal	Nektobenthos	Compact, Convex, Capable of Faster Swimming	0.75	Fortey & Owens, 1999	Absent	N/A
Prodrevermannia	Sepkoski, 2002	Arthropoda	Trilobita		PROETIDA		D	Gedi	D	Emsi-l	Demersal	Nektobenthos	Compact, Convex, Capable of Faster Swimming	0.75	Fortey & Owens, 1999	Absent	N/A
Proetidella	Sepkoski, 2002	Arthropoda	Trilobita		PROETIDA		O	Cara-u	O	Ashg-u	Demersal	Nektobenthos	Compact, Convex, Capable of Faster Swimming	0.75	Fortey & Owens, 1999	Absent	N/A
Proetides	Sepkoski, 2002	Arthropoda	Trilobita		PROETIDA		C	Tour-l	C	Tour-u	Demersal	Nektobenthos	Compact, Convex, Capable of Faster Swimming	0.75	Fortey & Owens, 1999	Absent	N/A
Proetina	Sepkoski, 2002	Arthropoda	Trilobita		PROETIDA		D	Sieg	D	Sieg	Demersal	Nektobenthos	Compact, Convex, Capable of Faster Swimming	0.75	Fortey & Owens, 1999	Absent	N/A
Proetocephalus	Sepkoski, 2002	Arthropoda	Trilobita		PROETIDA		D	Emsi-l	D	Emsi-u	Demersal	Nektobenthos	Compact, Convex, Capable of Faster Swimming	0.75	Fortey & Owens, 1999	Absent	N/A
Proetopeltis	Sepkoski, 2002	Arthropoda	Trilobita		PROETIDA		D	Emsi-l	D	Eife	Demersal	Nektobenthos	Compact, Convex, Capable of Faster Swimming	0.75	Fortey & Owens, 1999	Absent	N/A
Proetus	Sepkoski, 2002	Arthropoda	Trilobita		PROETIDA		O	Cara-m	S	Prid	Demersal	Nektobenthos	Compact, Convex, Capable of Faster Swimming	0.75	Fortey & Owens, 1999	Absent	N/A
Proscharyia	Sepkoski, 2002	Arthropoda	Trilobita		PROETIDA		O	Trem-l	O	Trem-u	Demersal	Nektobenthos	Compact, Convex, Capable of Faster Swimming	0.75	Fortey & Owens, 1999	Absent	N/A
Protarchaegonus	Sepkoski, 2002	Arthropoda	Trilobita		PROETIDA		O	Trem-l	O	Trem-l	Demersal	Nektobenthos	Compact, Convex, Capable of Faster Swimming	0.75	Fortey & Owens, 1999	Absent	N/A
Psalikilopsis	Sepkoski, 2002	Arthropoda	Trilobita		PROETIDA		O	Trem-u	O	Aren-l	Demersal	Nektobenthos	Compact, Convex, Capable of Faster Swimming	0.75	Fortey & Owens, 1999	Absent	N/A
Psalikilus	Sepkoski, 2002	Arthropoda	Trilobita		PROETIDA		O	Trem-u	O	Aren-l	Demersal	Nektobenthos	Compact, Convex, Capable of Faster Swimming	0.75	Fortey & Owens, 1999	Absent	N/A
Psephosthenaspis	Sepkoski, 2002	Arthropoda	Trilobita		PROETIDA		O	Llvi-l	O	Llvi-l	Demersal	Nektobenthos	Compact, Convex, Capable of Faster Swimming	0.75	Fortey & Owens, 1999	Absent	N/A
Pseudodechenella	Sepkoski, 2002	Arthropoda	Trilobita		PROETIDA		D	Sieg	D	Eife	Demersal	Nektobenthos	Compact, Convex, Capable of Faster Swimming	0.75	Fortey & Owens, 1999	Absent	N/A
Pseudogerastos	Sepkoski, 2002	Arthropoda	Trilobita		PROETIDA		S	Ldov-u	S	Wenl	Demersal	Nektobenthos	Compact, Convex, Capable of Faster Swimming	0.75	Fortey & Owens, 1999	Absent	N/A
Pseudohystricurus	Sepkoski, 2002	Arthropoda	Trilobita		PROETIDA		O	Trem-u	O	Llvi-l	Demersal	Nektobenthos	Compact, Convex, Capable of Faster Swimming	0.75	Fortey & Owens, 1999	Absent	N/A
Pseudoolenoides	Sepkoski, 2002	Arthropoda	Trilobita		PROETIDA		O	Llvi-l	O	Llvi-l	Demersal	Nektobenthos	Compact, Convex, Capable of Faster Swimming	0.75	Fortey & Owens, 1999	Absent	N/A
Pseudophillipsia	Sepkoski, 2002	Arthropoda	Trilobita		PROETIDA		C	Bash-u	P	Dora	Demersal	Nektobenthos	Compact, Convex, Capable of Faster Swimming	0.75	Fortey & Owens, 1999	Absent	N/A
Pseudoproetus	Sepkoski, 2002	Arthropoda	Trilobita		PROETIDA		S	Ldov	S	Ldov	Demersal	Nektobenthos	Compact, Convex, Capable of Faster Swimming	0.75	Fortey & Owens, 1999	Absent	N/A
Pseudotrinodus	Sepkoski, 2002	Arthropoda	Trilobita		PROETIDA		D	Emsi-u	D	Emsi-u	Demersal	Nektobenthos	Compact, Convex, Capable of Faster Swimming	0.75	Fortey & Owens, 1999	Absent	N/A
Pseudowaribole	Sepkoski, 2002	Arthropoda	Trilobita		PROETIDA		D	Fame-m	C	Mosc-l	Demersal	Nektobenthos	Compact, Convex, Capable of Faster Swimming	0.75	Fortey & Owens, 1999	Absent	N/A
Pterocoryphe	Sepkoski, 2002	Arthropoda	Trilobita		PROETIDA		D	Fras-l	D	Fras-l	Demersal	Nektobenthos	Compact, Convex, Capable of Faster Swimming	0.75	Fortey & Owens, 1999	Absent	N/A
Pteroparia	Sepkoski, 2002	Arthropoda	Trilobita		PROETIDA		D	Fras-m	D	Fras-u	Demersal	Nektobenthos	Compact, Convex, Capable of Faster Swimming	0.75	Fortey & Owens, 1999	Absent	N/A
Pudoproetus	Sepkoski, 2002	Arthropoda	Trilobita		PROETIDA		D	Fame-u	C	Mosc-l	Demersal	Nektobenthos	Compact, Convex, Capable of Faster Swimming	0.75	Fortey & Owens, 1999	Absent	N/A
Pulcherproetus	Sepkoski, 2002	Arthropoda	Trilobita		PROETIDA		S	Ludl-u	S	Prid	Demersal	Nektobenthos	Compact, Convex, Capable of Faster Swimming	0.75	Fortey & Owens, 1999	Absent	N/A
Pusillaboles	Sepkoski, 2002	Arthropoda	Trilobita		PROETIDA		D	Fame	D	Fame	Demersal	Nektobenthos	Compact, Convex, Capable of Faster Swimming	0.75	Fortey & Owens, 1999	Absent	N/A
Quadratoproetus	Sepkoski, 2002	Arthropoda	Trilobita		PROETIDA		D	Emsi-u	D	Emsi-u	Demersal	Nektobenthos	Compact, Convex, Capable of Faster Swimming	0.75	Fortey & Owens, 1999	Absent	N/A
Quyuania	Sepkoski, 2002	Arthropoda	Trilobita		PROETIDA		O	Cara-u	O	Cara-u	Demersal	Nektobenthos	Compact, Convex, Capable of Faster Swimming	0.75	Fortey & Owens, 1999	Absent	N/A
Radnoria	Sepkoski, 2002	Arthropoda	Trilobita		PROETIDA		O	Cara-m	S	Wenl-u	Demersal	Nektobenthos	Compact, Convex, Capable of Faster Swimming	0.75	Fortey & Owens, 1999	Absent	N/A
Radonia	Sepkoski, 2002	Arthropoda	Trilobita		PROETIDA		S	Wenl	S	Wenl	Demersal	Nektobenthos	Compact, Convex, Capable of Faster Swimming	0.75	Fortey & Owens, 1999	Absent	N/A
Rananasus	Sepkoski, 2002	Arthropoda	Trilobita		PROETIDA		O	Aren-l	O	Aren-l	Demersal	Nektobenthos	Compact, Convex, Capable of Faster Swimming	0.75	Fortey & Owens, 1999	Absent	N/A
Ranunculoproetus	Sepkoski, 2002	Arthropoda	Trilobita		PROETIDA		D	Gedi	D	Sieg	Demersal	Nektobenthos	Compact, Convex, Capable of Faster Swimming	0.75	Fortey & Owens, 1999	Absent	N/A
Raymondaspis	Sepkoski, 2002	Arthropoda	Trilobita		PROETIDA		O	Aren-u	O	Llde-u	Demersal	Nektobenthos	Compact, Convex, Capable of Faster Swimming	0.75	Fortey & Owens, 1999	Absent	N/A
Raymondites	Sepkoski, 2002	Arthropoda	Trilobita		PROETIDA		O	Llvi-l	O	Cara-m	Demersal	Nektobenthos	Compact, Convex, Capable of Faster Swimming	0.75	Fortey & Owens, 1999	Absent	N/A
Reediella	Sepkoski, 2002	Arthropoda	Trilobita		PROETIDA		C	Tour-l	C	Vise-u	Demersal	Nektobenthos	Compact, Convex, Capable of Faster Swimming	0.75	Fortey & Owens, 1999	Absent	N/A
Rhenogriffides	Sepkoski, 2002	Arthropoda	Trilobita		PROETIDA		C	Tour-u	C	Vise-l	Demersal	Nektobenthos	Compact, Convex, Capable of Faster Swimming	0.75	Fortey & Owens, 1999	Absent	N/A
Richteraspis	Sepkoski, 2002	Arthropoda	Trilobita		PROETIDA		D	Fras	D	Fras	Demersal	Nektobenthos	Compact, Convex, Capable of Faster Swimming	0.75	Fortey & Owens, 1999	Absent	N/A
Richterella	Sepkoski, 2002	Arthropoda	Trilobita		PROETIDA		C	Tour-l	C	Vise-l	Demersal	Nektobenthos	Compact, Convex, Capable of Faster Swimming	0.75	Fortey & Owens, 1999	Absent	N/A
Rorringtonia	Sepkoski, 2002	Arthropoda	Trilobita		PROETIDA		O	Llde-l	O	Ashg-m	Demersal	Nektobenthos	Compact, Convex, Capable of Faster Swimming	0.75	Fortey & Owens, 1999	Absent	N/A
Ryckholtia	Sepkoski, 2002	Arthropoda	Trilobita		PROETIDA		S	Ludl-u	D	Gedi	Demersal	Nektobenthos	Compact, Convex, Capable of Faster Swimming	0.75	Fortey & Owens, 1999	Absent	N/A
Scharyia	Sepkoski, 2002	Arthropoda	Trilobita		PROETIDA		O	Llde	D	Eife-l	Demersal	Nektobenthos	Compact, Convex, Capable of Faster Swimming	0.75	Fortey & Owens, 1999	Absent	N/A
Schizophillipsia	Sepkoski, 2002	Arthropoda	Trilobita		PROETIDA		C	Tour-u	C	Vise	Demersal	Nektobenthos	Compact, Convex, Capable of Faster Swimming	0.75	Fortey & Owens, 1999	Absent	N/A
Schizoproetina	Sepkoski, 2002	Arthropoda	Trilobita		PROETIDA		D	Gedi	D	Emsi-u	Demersal	Nektobenthos	Compact, Convex, Capable of Faster Swimming	0.75	Fortey & Owens, 1999	Absent	N/A
Schizoproetoides	Sepkoski, 2002	Arthropoda	Trilobita		PROETIDA		D	Sieg	D	Eife	Demersal	Nektobenthos	Compact, Convex, Capable of Faster Swimming	0.75	Fortey & Owens, 1999	Absent	N/A
Schizoproetus	Sepkoski, 2002	Arthropoda	Trilobita		PROETIDA		D	Emsi-l	D	Give-l	Demersal	Nektobenthos	Compact, Convex, Capable of Faster Swimming	0.75	Fortey & Owens, 1999	Absent	N/A
Sculptoproetus	Sepkoski, 2002	Arthropoda	Trilobita		PROETIDA		S	Prid	D	Eife-u	Demersal	Nektobenthos	Compact, Convex, Capable of Faster Swimming	0.75	Fortey & Owens, 1999	Absent	N/A
Sevillia	Sepkoski, 2002	Arthropoda	Trilobita		PROETIDA		C	Bash	C	Step-l	Demersal	Nektobenthos	Compact, Convex, Capable of Faster Swimming	0.75	Fortey & Owens, 1999	Absent	N/A
Simaproetus	Sepkoski, 2002	Arthropoda	Trilobita		PROETIDA		D	Sieg	D	Sieg	Demersal	Nektobenthos	Compact, Convex, Capable of Faster Swimming	0.75	Fortey & Owens, 1999	Absent	N/A
Sinobole	Sepkoski, 2002	Arthropoda	Trilobita		PROETIDA		D	Fame-l	D	Fame-m	Demersal	Nektobenthos	Compact, Convex, Capable of Faster Swimming	0.75	Fortey & Owens, 1999	Absent	N/A
Skemmatocare	Sepkoski, 2002	Arthropoda	Trilobita		PROETIDA		D	Fame-l	D	Fame-m	Demersal	Nektobenthos	Compact, Convex, Capable of Faster Swimming	0.75	Fortey & Owens, 1999	Absent	N/A
Skemmatopyge	Sepkoski, 2002	Arthropoda	Trilobita		PROETIDA		D	Fame-m	D	Fame-m	Demersal	Nektobenthos	Compact, Convex, Capable of Faster Swimming	0.75	Fortey & Owens, 1999	Absent	N/A
Solariproetus	Sepkoski, 2002	Arthropoda	Trilobita		PROETIDA		O	Ashg-u	O	Ashg-u	Demersal	Nektobenthos	Compact, Convex, Capable of Faster Swimming	0.75	Fortey & Owens, 1999	Absent	N/A
Songkania	Sepkoski, 2002	Arthropoda	Trilobita		PROETIDA		S	Ldov-u	S	Ldov-u	Demersal	Nektobenthos	Compact, Convex, Capable of Faster Swimming	0.75	Fortey & Owens, 1999	Absent	N/A
Spatulina	Sepkoski, 2002	Arthropoda	Trilobita		PROETIDA		C	Vise-l	C	Vise-u	Demersal	Nektobenthos	Compact, Convex, Capable of Faster Swimming	0.75	Fortey & Owens, 1999	Absent	N/A
Spinibole	Sepkoski, 2002	Arthropoda	Trilobita		PROETIDA		C	Vise-l	C	Vise-l	Demersal	Nektobenthos	Compact, Convex, Capable of Faster Swimming	0.75	Fortey & Owens, 1999	Absent	N/A
Stenoblepharum	Sepkoski, 2002	Arthropoda	Trilobita		PROETIDA		O	Llde-l	O	Ashg-u	Demersal	Nektobenthos	Compact, Convex, Capable of Faster Swimming	0.75	Fortey & Owens, 1999	Absent	N/A
Strigigenalis	Sepkoski, 2002	Arthropoda	Trilobita		PROETIDA		O	Trem-u	O	Aren-u	Demersal	Nektobenthos	Compact, Convex, Capable of Faster Swimming	0.75	Fortey & Owens, 1999	Absent	N/A
Tanybregma	Sepkoski, 2002	Arthropoda	Trilobita		PROETIDA		O	Trem-u	O	Trem-u	Demersal	Nektobenthos	Compact, Convex, Capable of Faster Swimming	0.75	Fortey & Owens, 1999	Absent	N/A
Tawstockia	Sepkoski, 2002	Arthropoda	Trilobita		PROETIDA		C	Vise	C	Vise	Demersal	Nektobenthos	Compact, Convex, Capable of Faster Swimming	0.75	Fortey & Owens, 1999	Absent	N/A
Tayanaella	Sepkoski, 2002	Arthropoda	Trilobita		PROETIDA		D	Gedi	D	Gedi	Demersal	Nektobenthos	Compact, Convex, Capable of Faster Swimming	0.75	Fortey & Owens, 1999	Absent	N/A
Tcherkesovia	Sepkoski, 2002	Arthropoda	Trilobita		PROETIDA		D	Gedi	D	Gedi	Demersal	Nektobenthos	Compact, Convex, Capable of Faster Swimming	0.75	Fortey & Owens, 1999	Absent	N/A
Tekinia	Sepkoski, 2002	Arthropoda	Trilobita		PROETIDA		S	Ludl	S	Prid	Demersal	Nektobenthos	Compact, Convex, Capable of Faster Swimming	0.75	Fortey & Owens, 1999	Absent	N/A
Thaiaspis	Sepkoski, 2002	Arthropoda	Trilobita		PROETIDA		C	Step	C	Step	Demersal	Nektobenthos	Compact, Convex, Capable of Faster Swimming	0.75	Fortey & Owens, 1999	Absent	N/A
Thalabaria	Sepkoski, 2002	Arthropoda	Trilobita		PROETIDA		C	Vise-l	C	Vise-l	Demersal	Nektobenthos	Compact, Convex, Capable of Faster Swimming	0.75	Fortey & Owens, 1999	Absent	N/A
Thebanaspis	Sepkoski, 2002	Arthropoda	Trilobita		PROETIDA		O	Ashg-m	S	Ldov-m	Demersal	Nektobenthos	Compact, Convex, Capable of Faster Swimming	0.75	Fortey & Owens, 1999	Absent	N/A
Thigriffides	Sepkoski, 2002	Arthropoda	Trilobita		PROETIDA		C	Tour-l	C	Tour-l	Demersal	Nektobenthos	Compact, Convex, Capable of Faster Swimming	0.75	Fortey & Owens, 1999	Absent	N/A
Timoraspis	Sepkoski, 2002	Arthropoda	Trilobita		PROETIDA		P	Leon-m	P	Guad-u	Demersal	Nektobenthos	Compact, Convex, Capable of Faster Swimming	0.75	Fortey & Owens, 1999	Absent	N/A
Toernquistia	Sepkoski, 2002	Arthropoda	Trilobita		PROETIDA		O	Llde-u	O	Ashg-u	Demersal	Nektobenthos	Compact, Convex, Capable of Faster Swimming	0.75	Fortey & Owens, 1999	Absent	N/A
Trautensteinproetus	Sepkoski, 2002	Arthropoda	Trilobita		PROETIDA		D	Emsi-l	D	Eife	Demersal	Nektobenthos	Compact, Convex, Capable of Faster Swimming	0.75	Fortey & Owens, 1999	Absent	N/A
Triproetus	Sepkoski, 2002	Arthropoda	Trilobita		PROETIDA		C	Step	P	Leon-l	Demersal	Nektobenthos	Compact, Convex, Capable of Faster Swimming	0.75	Fortey & Owens, 1999	Absent	N/A
Tropidocare	Sepkoski, 2002	Arthropoda	Trilobita		PROETIDA		D	Gedi	D	Gedi	Demersal	Nektobenthos	Compact, Convex, Capable of Faster Swimming	0.75	Fortey & Owens, 1999	Absent	N/A
Tropidocoryphe	Sepkoski, 2002	Arthropoda	Trilobita		PROETIDA		S	u	D	Give-u	Demersal	Nektobenthos	Compact, Convex, Capable of Faster Swimming	0.75	Fortey & Owens, 1999	Absent	N/A
Tschernyschewiella	Sepkoski, 2002	Arthropoda	Trilobita		PROETIDA		D	Sieg	D	Sieg	Demersal	Nektobenthos	Compact, Convex, Capable of Faster Swimming	0.75	Fortey & Owens, 1999	Absent	N/A
Typhloproetus	Sepkoski, 2002	Arthropoda	Trilobita		PROETIDA		D	Fame-u	C	l	Demersal	Nektobenthos	Compact, Convex, Capable of Faster Swimming	0.75	Fortey & Owens, 1999	Absent	N/A
Unguliproetus	Sepkoski, 2002	Arthropoda	Trilobita		PROETIDA		D	Sieg	D	Eife	Demersal	Nektobenthos	Compact, Convex, Capable of Faster Swimming	0.75	Fortey & Owens, 1999	Absent	N/A
Uromystrum	Sepkoski, 2002	Arthropoda	Trilobita		PROETIDA		O	Trem-u	O	Llvi-u	Demersal	Nektobenthos	Compact, Convex, Capable of Faster Swimming	0.75	Fortey & Owens, 1999	Absent	N/A
Vandergrachtia	Sepkoski, 2002	Arthropoda	Trilobita		PROETIDA		C	Vise-u	C	Vise-u	Demersal	Nektobenthos	Compact, Convex, Capable of Faster Swimming	0.75	Fortey & Owens, 1999	Absent	N/A
Vicinoproetus	Sepkoski, 2002	Arthropoda	Trilobita		PROETIDA		D	Sieg	D	Sieg	Demersal	Nektobenthos	Compact, Convex, Capable of Faster Swimming	0.75	Fortey & Owens, 1999	Absent	N/A
Vidria	Sepkoski, 2002	Arthropoda	Trilobita		PROETIDA		P	Leon-u	P	Guad-u	Demersal	Nektobenthos	Compact, Convex, Capable of Faster Swimming	0.75	Fortey & Owens, 1999	Absent	N/A
Vitaella	Sepkoski, 2002	Arthropoda	Trilobita		PROETIDA		D	Fame-m	D	Fame-m	Demersal	Nektobenthos	Compact, Convex, Capable of Faster Swimming	0.75	Fortey & Owens, 1999	Absent	N/A
Wagnerispina	Sepkoski, 2002	Arthropoda	Trilobita		PROETIDA		C	Serp-l	C	Serp-l	Demersal	Nektobenthos	Compact, Convex, Capable of Faster Swimming	0.75	Fortey & Owens, 1999	Absent	N/A
Warburgaspis	Sepkoski, 2002	Arthropoda	Trilobita		PROETIDA		O	Ashg	O	Ashg	Demersal	Nektobenthos	Compact, Convex, Capable of Faster Swimming	0.75	Fortey & Owens, 1999	Absent	N/A
Warburgella	Sepkoski, 2002	Arthropoda	Trilobita		PROETIDA		O	Ashg-m	D	Gedi-u	Demersal	Nektobenthos	Compact, Convex, Capable of Faster Swimming	0.75	Fortey & Owens, 1999	Absent	N/A
Waribole	Sepkoski, 2002	Arthropoda	Trilobita		PROETIDA		D	Fame-m	C	Mosc-l	Demersal	Nektobenthos	Compact, Convex, Capable of Faster Swimming	0.75	Fortey & Owens, 1999	Absent	N/A
Weania	Sepkoski, 2002	Arthropoda	Trilobita		PROETIDA		C	Tour-l	C	Bash-u	Demersal	Nektobenthos	Compact, Convex, Capable of Faster Swimming	0.75	Fortey & Owens, 1999	Absent	N/A
Weberides	Sepkoski, 2002	Arthropoda	Trilobita		PROETIDA		C	l	C	Bash	Demersal	Nektobenthos	Compact, Convex, Capable of Faster Swimming	0.75	Fortey & Owens, 1999	Absent	N/A
Weberiphillipsia	Sepkoski, 2002	Arthropoda	Trilobita		PROETIDA		C	Tour-u	C	Vise-u	Demersal	Nektobenthos	Compact, Convex, Capable of Faster Swimming	0.75	Fortey & Owens, 1999	Absent	N/A
Winterbergia	Sepkoski, 2002	Arthropoda	Trilobita		PROETIDA		C	Tour-l	C	Vise-u	Demersal	Nektobenthos	Compact, Convex, Capable of Faster Swimming	0.75	Fortey & Owens, 1999	Absent	N/A
Wolayella	Sepkoski, 2002	Arthropoda	Trilobita		PROETIDA		D	Gedi-u	D	Emsi-l	Demersal	Nektobenthos	Compact, Convex, Capable of Faster Swimming	0.75	Fortey & Owens, 1999	Absent	N/A
Xenocybe	Sepkoski, 2002	Arthropoda	Trilobita		PROETIDA		O	Ashg-l	O	Ashg-l	Demersal	Nektobenthos	Compact, Convex, Capable of Faster Swimming	0.75	Fortey & Owens, 1999	Absent	N/A
Xenodechenella	Sepkoski, 2002	Arthropoda	Trilobita		PROETIDA		D	Emsi-u	D	Emsi-u	Demersal	Nektobenthos	Compact, Convex, Capable of Faster Swimming	0.75	Fortey & Owens, 1999	Absent	N/A
Xiphogonium	Sepkoski, 2002	Arthropoda	Trilobita		PROETIDA		D	Sieg	D	Emsi-u	Demersal	Nektobenthos	Compact, Convex, Capable of Faster Swimming	0.75	Fortey & Owens, 1999	Absent	N/A
Zhegangula	Sepkoski, 2002	Arthropoda	Trilobita		PROETIDA		C	Bash-u	C	Bash-u	Demersal	Nektobenthos	Compact, Convex, Capable of Faster Swimming	0.75	Fortey & Owens, 1999	Absent	N/A
Ctenopyge	Sepkoski, 2002	Arthropoda	Trilobita		PTYCHOPARIIDA	Leptoplastinae	Cm	Fran-u	Cm	Fran-u	Planktic	Nektoplankton	Nearly Globular Eyes, Downward Genal Spines, Narrow Thorax, Less Streamlined	0.75	Harrington et al., 1959; Fortey, 1985	Absent	N/A
Eurycare	Sepkoski, 2002	Arthropoda	Trilobita		PTYCHOPARIIDA	Leptoplastinae	Cm	Fran-u	Cm	Fran-u	Planktic	Nektoplankton	Nearly Globular Eyes, Downward Genal Spines, Narrow Thorax, Less Streamlined	0.75	Harrington et al., 1959; Fortey, 1985	Absent	N/A
Leptoplastus	Sepkoski, 2002	Arthropoda	Trilobita		PTYCHOPARIIDA	Leptoplastinae	Cm	Fran-u	O	Trem-l	Planktic	Nektoplankton	Nearly Globular Eyes, Downward Genal Spines, Narrow Thorax, Less Streamlined	0.75	Harrington et al., 1959; Fortey, 1985	Absent	N/A
Mekynophrys	Sepkoski, 2002	Arthropoda	Trilobita		PTYCHOPARIIDA	Leptoplastinae	O	Trem	O	Trem	Planktic	Nektoplankton	Nearly Globular Eyes, Downward Genal Spines, Narrow Thorax, Less Streamlined	0.75	Harrington et al., 1959; Fortey, 1985	Absent	N/A
Sphaerophthalmus	Sepkoski, 2002	Arthropoda	Trilobita		PTYCHOPARIIDA	Leptoplastinae	Cm	Fran-u	Cm	Fran-u	Planktic	Nektoplankton	Nearly Globular Eyes, Downward Genal Spines, Less Streamlined	0.75	Harrington et al., 1959; Fortey, 1985	Absent	N/A
Leptoplastides	Sepkoski, 2002	Arthropoda	Trilobita		PTYCHOPARIIDA		O	Trem-l	O	Trem-u	Planktic	Nektoplankton	Nearly Globular Eyes, Downward Genal Spines, Less Streamlined	0.75	Fortey, 1985	Absent	N/A
Parabolina	Sepkoski, 2002	Arthropoda	Trilobita		PTYCHOPARIIDA		Cm	Fran-l	O	Trem-l	Planktic	Nektoplankton	Large Elongate Eyes, Widespread Across Facies	0.5	Fortey, 1985	Absent	N/A
Centropleura	Sepkoski, 2002	Arthropoda	Trilobita		REDLICHIIDA		Cm	uMid-u	Cm	uMid-u	Nektic	Planktonekton	Large Elongate Eyes, Widespread Across Facies	0.5	Fortey, 1985	Absent	N/A
Douglasocaris	Sepkoski, 2002	Arthropoda	Uncertain	Branchiopoda	uncertain		O	Llde	O	Llde	Demersal	Nektobenthos	Bivalved Carapace, Detritivour, Generally Depressed, Extant Taxa Swim & Crawl	0.75	Tasch, 1969; Rolfe, 1969; Briggs et al., 2015	Absent	N/A
Yohoia	Sepkoski, 2002	Arthropoda	Uncertain	Megacheira	uncertain		Cm	mMid-u	Cm	mMid-u	Demersal	Nektobenthos	Depressiform, Swimming Exopod, Walking Endopod	0.75	Briggs & Whittington, 1985; Conway Morris et al., 2015	Absent	N/A
Liantuoia	Sepkoski, 2002	Arthropoda	Uncertain	Phyllocarida	uncertain		Cm	Atda-u	Cm	Atda-u	Nektic	Planktonekton	Most Phyllocarids Planktonektic	0.25	Rolfe, 1969; Zhi-Lin & Shi-Cheng, 1990; Crasquin et al., 2009	Absent	N/A
Pseudoarctolepis	Sepkoski, 2002	Arthropoda	Uncertain	Phyllocarida	uncertain		Cm	mMid-u	Cm	uMid-l	Nektic	Eunekton	Compressiform, Lateral Stabilizers	1	Brooks & Caster, 1956	Absent	N/A
Quasicaris	Sepkoski, 2002	Arthropoda	Uncertain	Phyllocarida	uncertain		O	Cara-l	O	Cara-l	Nektic	Planktonekton	Most Phyllocarids Planktonektic	0.25	Rolfe, 1961; Rolfe, 1969; Crasquin et al., 2009	Absent	N/A
Actaeus	Sepkoski, 2002	Arthropoda	Uncertain		uncertain		Cm	mMid-u	Cm	mMid-u	Demersal	Eudemersus	Similar to Leanchoilia (No Waling Limbs, Swimming Outer Branches)	1	Briggs & Whittington, 1985	Absent	N/A
Alalcomenaeus	Sepkoski, 2002	Arthropoda	Uncertain		uncertain		Cm	Atda-u	Cm	uMid-l	Demersal	Eudemersus	Paddle-like Telson, Swimming Outer Branches, Non-Walking Grasping/Tearing Inner Branch, Depressiform	0.75	Briggs & Whittington, 1985; Briggs & Collins, 1999	Absent	N/A
Bostrichopus	Sepkoski, 2002	Arthropoda	Uncertain		uncertain		C	Tour	C	Tour	Planktic	Nektoplankton	Small, Thin Thorax, Filamentous Limbs	0.5	Steinmann, 1928	Absent	N/A
Bundenbachiellus	Sepkoski, 2002	Arthropoda	Uncertain		uncertain		D	Emsi-l	D	Emsi-l	Demersal	Nektobenthos	Walking Limbs, Vermiform, Numerous Filamentous Spine Appendages	0.75	Moore et al., 2008; Siveter et al., 2014	Absent	N/A
Chuandianella	Sepkoski, 2002	Arthropoda	Uncertain		uncertain		Cm	Atda-u	Cm	Atda-u	Demersal	Nektobenthos	Waptia-like	0	Vannier et al., 2003; Xian-Guang et al, 2009	Absent	N/A
Dicerocaris	Sepkoski, 2002	Arthropoda	Uncertain		uncertain		Cm	uMid-l	Cm	uMid-l	Nektic	Eunekton	Compressiform, Lateral Stabilizers	1	Brooks & Caster, 1956; Briggs & Robison, 1984	Absent	N/A
Habelia	Sepkoski, 2002	Arthropoda	Uncertain		uncertain		Cm	mMid-u	Cm	mMid-u	Demersal	Nektobenthos	Walking Limbs, Swimming Limbs	1	Whittington, 1981	Absent	N/A
Jianfengia	Sepkoski, 2002	Arthropoda	Uncertain		uncertain		Cm	Atda-u	Cm	Atda-u	Demersal	Nektobenthos	Poorly Preserved, Great Appendage, Similar to Yohoia (Depressiform, Swimming Exopod, Walking Endopod)	0.75	Briggs & Whittington, 1985; Haug et al., 2012; Conway Morris et al., 2015	Absent	N/A
Molaria	Sepkoski, 2002	Arthropoda	Uncertain		uncertain		Cm	mMid-u	Cm	mMid-u	Demersal	Nektobenthos	Flattened Venter, Vaulted Dorsum, Walking Limbs, Swimming Limbs	1	Whittington, 1981	Absent	N/A
Pahvantia	Sepkoski, 2002	Arthropoda	Uncertain		uncertain		Cm	uMid-l	Cm	uMid-l	Nektic	Planktonekton	Poorly Preserved, Univalved Elongate Spearhead-Shaped Carapace	0.25	Robison & Richards, 1981	Absent	N/A
Protocaris	Sepkoski, 2002	Arthropoda	Uncertain		uncertain		Cm	Boto	Cm	uMid	Demersal	Eudemersus	Dextrous Anterior Appendage, Swimming Lemellate Appendages, Stabilizing/Steering Telson	0.75	Briggs & Whittington, 1985; Wu et al., 2016	Absent	N/A
Serracaris	Sepkoski, 2002	Arthropoda	Uncertain		uncertain		Cm	Tojo	Cm	Tojo	Demersal	Eudemersus	Elongate, Depressed, Somewhat Streamlined, Lightly Mineralized	0.5	Briggs,1978	Absent	N/A
Utahcaris	Sepkoski, 2002	Arthropoda	Uncertain		uncertain		Cm	mMid-l	Cm	mMid-l	Demersal	Nektobenthos	Depressiform, Walking Limbs, Elongate Trunk Somites, Paddle-Shaped Telson	1	Legg & Pates, 2017	Absent	N/A
Vetulicola	Sepkoski, 2002	Arthropoda	Uncertain		uncertain		Cm	Atda-u	Cm	Atda-u	Nektic	Planktonekton	Compressed, Muscular Posterior "Fin"	0.75	Shu et al., 2001	Absent	N/A
Tuzoia	Sepkoski, 2002	Arthropoda		Phyllocarida	INCERTAE SEDIS		Cm	Atda-u	Cm	mMid-m	Nektic	Planktonekton	Most Phyllocarids Planktonektic	0.25	Rolfe, 1969; Crasquin et al., 2009	Absent	N/A
Dioxycaris	Sepkoski, 2002	Arthropoda			INCERTAE SEDIS		Cm	Boto	Cm	uMid-l	Nektic	Planktonekton	Similar to Thylacocephala (Streamlined Carapace, Large Panoramic Acute Eyes, Raptorial Appendages, Swimming Pleopods Likely too Weak for Eunektic Swimming, Comparison to Extant Hyperiidae)	0.25	Rolfe, 1985	Absent	N/A
Galenocaris	Sepkoski, 2002	Arthropoda			INCERTAE SEDIS		O	Ashg-m	O	Ashg-m	Nektic	Planktonekton	Similar to Thylacocephala (Streamlined Carapace, Large Panoramic Acute Eyes, Raptorial Appendages, Swimming Pleopods Likely too Weak for Eunektic Swimming, Comparison to Extant Hyperiidae)	0.25	Rolfe, 1985	Absent	N/A
Nothozoe	Sepkoski, 2002	Arthropoda			INCERTAE SEDIS		Cm	Boto	O	Cara-l	Nektic	Planktonekton	Similar to Thylacocephala (Streamlined Carapace, Large Panoramic Acute Eyes, Raptorial Appendages, Swimming Pleopods Likely too Weak for Eunektic Swimming, Comparison to Extant Hyperiidae)	0.25	Rolfe, 1985	Absent	N/A
Saccocaris	Sepkoski, 2002	Arthropoda			INCERTAE SEDIS		Cm	u	O	l	Nektic	Planktonekton	Similar to Thylacocephala (Streamlined Carapace, Large Panoramic Acute Eyes, Raptorial Appendages, Swimming Pleopods Likely too Weak for Eunektic Swimming, Comparison to Extant Hyperiidae)	0.25	Rolfe, 1985	Absent	N/A
Bredocaris	Sepkoski, 2002	Arthropoda			ORSTENOCARIDA		Cm	Fran-u	Cm	Fran-u	Planktic	Nektoplankton	Several Prominent Swimming Limbs	0.75	Newman, 2005	Absent	N/A
Isoxys	Sepkoski, 2002	Arthropoda			uncertain		Cm	Atda-l	Cm	mMid-u	Planktic	Nektoplankton	Paddle Exopods, Comparison to Recent Pelagic Ostracods	0.75	Vannier et al., 2009; Vannier & Chen, 2000	Absent	N/A
Waptia	Sepkoski, 2002	Arthropoda			WAPTIIDA		Cm	mMid-u	Cm	mMid-u	Demersal	Nektobenthos	Bivalved, Tail Flukes, None Given	0.25	Vannier et al., 2003; Yang et al., 2016	Absent	N/A
Amphigeisina	Sepkoski, 2002	Chaetognatha			PROTOCONODONTIDA		Cm	Atda-u	Cm	mMid	Nektic	Planktonekton	Well-Streamlined Body and Fins, Terminal Mouth, Extant Taxa	0.5	Aleyev, 1977	Absent	N/A
Ganloudina	Sepkoski, 2002	Chaetognatha			PROTOCONODONTIDA		Cm	Tomm	Cm	Tomm	Nektic	Planktonekton	Well-Streamlined Body and Fins, Terminal Mouth, Extant Taxa	0.5	Aleyev, 1977	Absent	N/A
Gapparodus	Sepkoski, 2002	Chaetognatha			PROTOCONODONTIDA		Cm	Atda-l	Cm	Dres	Nektic	Planktonekton	Well-Streamlined Body and Fins, Terminal Mouth, Extant Taxa	0.5	Aleyev, 1977	Absent	N/A
Kijacus	Sepkoski, 2002	Chaetognatha			PROTOCONODONTIDA		Cm	Tomm-l	Cm	Atda-u	Nektic	Planktonekton	Well-Streamlined Body and Fins, Terminal Mouth, Extant Taxa	0.5	Aleyev, 1977	Absent	N/A
Leguminella	Sepkoski, 2002	Chaetognatha			PROTOCONODONTIDA		Cm	Tomm-u	Cm	Tomm-u	Nektic	Planktonekton	Well-Streamlined Body and Fins, Terminal Mouth, Extant Taxa	0.5	Aleyev, 1977	Absent	N/A
Maldeotaia	Sepkoski, 2002	Chaetognatha			PROTOCONODONTIDA		Cm	Tomm-l	Cm	Tomm-l	Nektic	Planktonekton	Well-Streamlined Body and Fins, Terminal Mouth, Extant Taxa	0.5	Aleyev, 1977	Absent	N/A
Mongolodus	Sepkoski, 2002	Chaetognatha			PROTOCONODONTIDA		Cm	Boto-l	Cm	Boto-l	Nektic	Planktonekton	Well-Streamlined Body and Fins, Terminal Mouth, Extant Taxa	0.5	Aleyev, 1977	Absent	N/A
Protohertzina	Sepkoski, 2002	Chaetognatha			PROTOCONODONTIDA		V	N-Da-l	Cm	Boto-l	Nektic	Planktonekton	Well-Streamlined Body and Fins, Terminal Mouth, Extant Taxa	0.5	Aleyev, 1977	Absent	N/A
Incertae sedis	Sepkoski, 2002	Chaetognatha			uncertain		Cm	mMid-l	Cm	mMid-l	Nektic	Planktonekton	Well-Streamlined Body and Fins, Terminal Mouth, Extant Taxa	0.5	Aleyev, 1977	Absent	N/A
Paucijaculum	Sepkoski, 2002	Chaetognatha			uncertain		C	Mosc-u	C	Mosc-u	Nektic	Planktonekton	Well-Streamlined Body and Fins, Terminal Mouth, Extant Taxa	0.5	Aleyev, 1977	Absent	N/A
Titerina	Sepkoski, 2002	Chaetognatha			uncertain		O	Aren-l	O	Aren-l	Nektic	Planktonekton	Well-Streamlined Body and Fins, Terminal Mouth, Extant Taxa	0.5	Aleyev, 1977	Absent	N/A
Acanthodes	Denison, 1979	Chordata	Acanthodii		ACANTHODIDA		C	Tour	P	Asse	Nektic	Eunekton	Fusiform, Heterocercal Tail	1	Denison, 1979	Absent	Nektic
Cheiracanthus	Denison, 1979	Chordata	Acanthodii		ACANTHODIDA		D	Sieg	D	Give	Nektic	Eunekton	Fusiform, Heterocercal Tail	1	Denison, 1979	Absent	Nektic
Haplacanthus	Sepkoski, 2002	Chordata	Acanthodii		ACANTHODIDA		D	Emsi-u	D	Fras	Nektic	Eunekton	Fusiform, Heterocercal Tail	1	Denison, 1979	Present	Nektic
Homalacanthus	Denison, 1979	Chordata	Acanthodii		ACANTHODIDA		D	Fras	D	Fras	Nektic	Eunekton	Fusiform, Heterocercal Tail	1	Denison, 1979	Absent	Nektic
Mesacanthus	Denison, 1979	Chordata	Acanthodii		ACANTHODIDA		D	Gedi	D	Give	Nektic	Eunekton	Fusiform, Heterocercal Tail	1	Denison, 1979	Absent	Nektic
Protogonacanthus	Sepkoski, 2002	Chordata	Acanthodii		ACANTHODIDA		D	Fras-l	D	Fras-l	Nektic	Eunekton	Fusiform, Heterocercal Tail	1	Denison, 1979	Present	Nektic
Pseudacanthodes	Denison, 1979	Chordata	Acanthodii		ACANTHODIDA		C	Mosc	C	Mosc	Nektic	Eunekton	Fusiform, Heterocercal Tail	1	Denison, 1979	Absent	Nektic
Traquairichthys	Denison, 1979	Chordata	Acanthodii		ACANTHODIDA		C	Mosc	C	Mosc	Nektic	Eunekton	Fusiform, Heterocercal Tail	1	Denison, 1979	Absent	Nektic
Triazeugacanthus	Denison, 1979	Chordata	Acanthodii		ACANTHODIDA		D	Fras	D	Fras	Nektic	Eunekton	Fusiform, Heterocercal Tail	1	Denison, 1979	Absent	Nektic
Aganacanthus	Denison, 1979	Chordata	Acanthodii		CLIMATIIFORMES		C	Serp	C	Serp	Nektic	Eunekton	Fusiform, Heterocercal Tail	1	Denison, 1979	Absent	Nektic
Brachyacanthus	Denison, 1979	Chordata	Acanthodii		CLIMATIIFORMES		D	Gedi	D	Gedi	Nektic	Eunekton	Fusiform, Heterocercal Tail	1	Denison, 1979	Absent	Nektic
Cassidiceps	Sepkoski, 2002	Chordata	Acanthodii		CLIMATIIFORMES		D	Gedi	D	Gedi	Nektic	Eunekton	Fusiform, Heterocercal Tail	1	Denison, 1979	Present	Nektic
Cheiracanthoides	Sepkoski, 2002	Chordata	Acanthodii		CLIMATIIFORMES		D	Eife-u	D	Fras-l	Nektic	Eunekton	Fusiform, Heterocercal Tail	1	Denison, 1979	Present	Nektic
Climatius	Denison, 1979	Chordata	Acanthodii		CLIMATIIFORMES		S	Prid	D	Emsi	Nektic	Eunekton	Fusiform, Heterocercal Tail	1	Denison, 1979	Absent	Nektic
Dendracanthus	Denison, 1979	Chordata	Acanthodii		CLIMATIIFORMES		S	Prid	S	Prid	Nektic	Eunekton	Fusiform, Heterocercal Tail	1	Denison, 1979	Absent	Nektic
Diplacanthoides	Denison, 1979	Chordata	Acanthodii		CLIMATIIFORMES		S	Prid	D	Gedi	Nektic	Eunekton	Fusiform, Heterocercal Tail	1	Denison, 1979	Absent	Nektic
Diplacanthus	Denison, 1979	Chordata	Acanthodii		CLIMATIIFORMES		D	Eife	D	Fras	Nektic	Eunekton	Fusiform, Heterocercal Tail	1	Denison, 1979	Absent	Nektic
Dontacanthus	Denison, 1979	Chordata	Acanthodii		CLIMATIIFORMES		S	Prid	S	Prid	Nektic	Eunekton	Fusiform, Heterocercal Tail	1	Denison, 1979	Absent	Nektic
Erriwacanthus	Denison, 1979	Chordata	Acanthodii		CLIMATIIFORMES		S	Prid	D	Gedi	Nektic	Eunekton	Fusiform, Heterocercal Tail	1	Denison, 1979	Absent	Nektic
Euthacanthus	Denison, 1979	Chordata	Acanthodii		CLIMATIIFORMES		D	Gedi	D	Gedi	Nektic	Eunekton	Fusiform, Heterocercal Tail	1	Denison, 1979	Absent	Nektic
Gomphodus	Denison, 1979	Chordata	Acanthodii		CLIMATIIFORMES		S	Prid	D	Gedi	Nektic	Eunekton	Fusiform, Heterocercal Tail	1	Denison, 1979	Absent	Nektic
Gomphonchus	Sepkoski, 2002	Chordata	Acanthodii		CLIMATIIFORMES		S	Ludl	S	Ludl	Nektic	Eunekton	Fusiform, Heterocercal Tail	1	Denison, 1979	Present	Nektic
Gyracanthides	Denison, 1979	Chordata	Acanthodii		CLIMATIIFORMES		D	Fame	C	Tour	Nektic	Eunekton	Fusiform, Heterocercal Tail	1	Denison, 1979	Absent	Nektic
Gyracanthus	Sepkoski, 2002	Chordata	Acanthodii		CLIMATIIFORMES		D	Sieg	C	Mosc-l	Nektic	Eunekton	Fusiform, Heterocercal Tail	1	Denison, 1979	Present	Nektic
Hanilepis	Sepkoski, 2002	Chordata	Acanthodii		CLIMATIIFORMES		S	Ludl	S	Ludl	Nektic	Eunekton	Fusiform, Heterocercal Tail	1	Denison, 1979	Present	Nektic
Kathemacanthus	Sepkoski, 2002	Chordata	Acanthodii		CLIMATIIFORMES		D	Gedi	D	Gedi	Nektic	Eunekton	Fusiform, Heterocercal Tail	1	Denison, 1979	Present	Nektic
Lupopsyrus	Sepkoski, 2002	Chordata	Acanthodii		CLIMATIIFORMES		D	Gedi	D	Gedi	Nektic	Eunekton	Fusiform, Heterocercal Tail	1	Denison, 1979	Present	Nektic
Marsdenius	Sepkoski, 2002	Chordata	Acanthodii		CLIMATIIFORMES		C	Bash-l	C	Bash-l	Nektic	Eunekton	Fusiform, Heterocercal Tail	1	Denison, 1979	Present	Nektic
Nostolepis	Sepkoski, 2002	Chordata	Acanthodii		CLIMATIIFORMES		S	Wenl	D	Give-l	Nektic	Eunekton	Fusiform, Heterocercal Tail	1	Denison, 1979	Present	Nektic
Parexus	Denison, 1979	Chordata	Acanthodii		CLIMATIIFORMES		D	Gedi	D	Gedi	Nektic	Eunekton	Fusiform, Heterocercal Tail	1	Denison, 1979	Absent	Nektic
Pruemolepis	Sepkoski, 2002	Chordata	Acanthodii		CLIMATIIFORMES		D	Gedi-l	C	Tour-l	Nektic	Eunekton	Fusiform, Heterocercal Tail	1	Denison, 1979	Present	Nektic
Ptomacanthus	Denison, 1979	Chordata	Acanthodii		CLIMATIIFORMES		D	Gedi	D	Gedi	Nektic	Eunekton	Fusiform, Heterocercal Tail	1	Denison, 1979	Absent	Nektic
Rhabdiodus	Denison, 1979	Chordata	Acanthodii		CLIMATIIFORMES		S	Prid	S	Prid	Nektic	Eunekton	Fusiform, Heterocercal Tail	1	Denison, 1979	Absent	Nektic
Sabrinacanthus	Denison, 1979	Chordata	Acanthodii		CLIMATIIFORMES		D	Gedi	D	Gedi	Nektic	Eunekton	Fusiform, Heterocercal Tail	1	Denison, 1979	Absent	Nektic
Vernicomacanthus	Denison, 1979	Chordata	Acanthodii		CLIMATIIFORMES		D	Gedi	D	Gedi	Nektic	Eunekton	Fusiform, Heterocercal Tail	1	Denison, 1979	Absent	Nektic
Doliodus	Sepkoski, 2002	Chordata	Acanthodii		ISCHNACANTHIDA	Omalodontidae	S	Ludl-u	D	Gedi-l	Nektic	Eunekton	Fusiform, Heterocercal Tail	1	Denison, 1979	Present	Nektic
Acanthodopsis	Denison, 1979	Chordata	Acanthodii		ISCHNACANTHIDA		C	Bash	C	Mosc	Nektic	Eunekton	Fusiform, Heterocercal Tail	1	Denison, 1979	Absent	Nektic
Apateacanthus	Sepkoski, 2002	Chordata	Acanthodii		ISCHNACANTHIDA		D	Fras	D	Fras	Nektic	Eunekton	Fusiform, Heterocercal Tail	1	Denison, 1979	Present	Nektic
Atopacanthus	Sepkoski, 2002	Chordata	Acanthodii		ISCHNACANTHIDA		D	Eife	D	Fras-m	Nektic	Eunekton	Fusiform, Heterocercal Tail	1	Denison, 1979	Present	Nektic
Helenacanthus	Denison, 1979	Chordata	Acanthodii		ISCHNACANTHIDA		D	Gedi	D	Gedi	Nektic	Eunekton	Fusiform, Heterocercal Tail	1	Denison, 1979	Absent	Nektic
Ischnacanthus	Sepkoski, 2002	Chordata	Acanthodii		ISCHNACANTHIDA		S	Prid	D	Sieg-l	Nektic	Eunekton	Fusiform, Heterocercal Tail	1	Denison, 1979	Present	Nektic
Onchus	Sepkoski, 2002	Chordata	Acanthodii		ISCHNACANTHIDA		S	Ldov-u	D	Fame	Nektic	Eunekton	Fusiform, Heterocercal Tail	1	Denison, 1979	Present	Nektic
Persacanthus	Sepkoski, 2002	Chordata	Acanthodii		ISCHNACANTHIDA		D	Fras-l	D	Fras-m	Nektic	Eunekton	Fusiform, Heterocercal Tail	1	Denison, 1979	Present	Nektic
Plectrodus	Denison, 1979	Chordata	Acanthodii		ISCHNACANTHIDA		S	Prid	S	Prid	Nektic	Eunekton	Fusiform, Heterocercal Tail	1	Denison, 1979	Absent	Nektic
Poracanthodes	Sepkoski, 2002	Chordata	Acanthodii		ISCHNACANTHIDA		S	Ludl	S	Ludl	Nektic	Eunekton	Fusiform, Heterocercal Tail	1	Denison, 1979	Present	Nektic
Uraniacanthus	Denison, 1979	Chordata	Acanthodii		ISCHNACANTHIDA		D	Gedi	D	Gedi	Nektic	Eunekton	Fusiform, Heterocercal Tail	1	Denison, 1979	Absent	Nektic
Xylacanthus	Denison, 1979	Chordata	Acanthodii		ISCHNACANTHIDA		D	Gedi	D	Gedi	Nektic	Eunekton	Fusiform, Heterocercal Tail	1	Denison, 1979	Absent	Nektic
Brochoadmones	Sepkoski, 2002	Chordata	Acanthodii		uncertain	Climatiidae	D	Gedi	D	Gedi	Nektic	Eunekton	Fusiform, Heterocercal Tail	1	Denison, 1979	Present	Nektic
Gladiobranchus	Sepkoski, 2002	Chordata	Acanthodii		uncertain	Diplacanthidae	D	Gedi	D	Gedi	Nektic	Eunekton	Fusiform, Heterocercal Tail	1	Denison, 1979	Present	Nektic
Oracanthus	Sepkoski, 2002	Chordata	Acanthodii		uncertain	Gyracanthidae	C	Tour	C	Serp-l	Nektic	Eunekton	Fusiform, Heterocercal Tail	1	Denison, 1979	Present	Nektic
Archaeacanthus	Denison, 1979	Chordata	Acanthodii		uncertain		D	Eife	D	Give	Nektic	Eunekton	Fusiform, Heterocercal Tail	1	Denison, 1979	Absent	Nektic
Byssacanthoides	Denison, 1979	Chordata	Acanthodii		uncertain		D	Give	D	Fras	Nektic	Eunekton	Fusiform, Heterocercal Tail	1	Denison, 1979	Absent	Nektic
Campylodus	Denison, 1979	Chordata	Acanthodii		uncertain		S	Prid	S	Prid	Nektic	Eunekton	Fusiform, Heterocercal Tail	1	Denison, 1979	Absent	Nektic
Devononchus	Denison, 1979	Chordata	Acanthodii		uncertain		D	Fras	D	Fame	Nektic	Eunekton	Fusiform, Heterocercal Tail	1	Denison, 1979	Absent	Nektic
Eupleurogmus	Denison, 1979	Chordata	Acanthodii		uncertain		C	Tour	C	Tour	Nektic	Eunekton	Fusiform, Heterocercal Tail	1	Denison, 1979	Absent	Nektic
Gemuendolepis	Sepkoski, 2002	Chordata	Acanthodii		uncertain		D	Emsi-l	D	Emsi-l	Nektic	Eunekton	Fusiform, Heterocercal Tail	1	Denison, 1979	Present	Nektic
Gomphacanthus	Sepkoski, 2002	Chordata	Acanthodii		uncertain		S	Prid	C	Mosc-u	Nektic	Eunekton	Fusiform, Heterocercal Tail	1	Denison, 1979	Present	Nektic
Homacanthus	Sepkoski, 2002	Chordata	Acanthodii		uncertain		D	Eife	C	Bash-u	Nektic	Eunekton	Fusiform, Heterocercal Tail	1	Denison, 1979	Present	Nektic
Machaeracanthus	Sepkoski, 2002	Chordata	Acanthodii		uncertain		D	Gedi-l	D	Fras-l	Nektic	Eunekton	Fusiform, Heterocercal Tail	1	Denison, 1979	Present	Nektic
Monopleurodus	Denison, 1979	Chordata	Acanthodii		uncertain		S	Prid	S	Prid	Nektic	Eunekton	Fusiform, Heterocercal Tail	1	Denison, 1979	Absent	Nektic
Nodocosta	Sepkoski, 2002	Chordata	Acanthodii		uncertain		D	Emsi	D	Fras-l	Nektic	Eunekton	Fusiform, Heterocercal Tail	1	Denison, 1979	Present	Nektic
Nodonchus	Sepkoski, 2002	Chordata	Acanthodii		uncertain		D	Sieg-l	D	Sieg-l	Nektic	Eunekton	Fusiform, Heterocercal Tail	1	Denison, 1979	Present	Nektic
Pinnacanthus	Denison, 1979	Chordata	Acanthodii		uncertain		D	Gedi	D	Gedi	Nektic	Eunekton	Fusiform, Heterocercal Tail	1	Denison, 1979	Absent	Nektic
Ptychodictyon	Denison, 1979	Chordata	Acanthodii		uncertain		D	Eife	D	Eife	Nektic	Eunekton	Fusiform, Heterocercal Tail	1	Denison, 1979	Absent	Nektic
Sinacanthus	Denison, 1979	Chordata	Acanthodii		uncertain		D	Give	D	Give	Nektic	Eunekton	Fusiform, Heterocercal Tail	1	Denison, 1979	Absent	Nektic
Cowielepis	Blom, 2012	Chordata	Cephalaspidomorphi	Anaspida	ANASPIDA		S	Wenl	S	Ludl	Nektic	Eunekton	Compressiform	1	Blom, 2012	Absent	Demersal
Jamoytius	Sepkoski, 2002	Chordata	Cephalaspidomorphi	Anaspida	ANASPIDA		S	Ldov-u	D	Gedi-l	Nektic	Eunekton	Compressiform	1	Blom, 2012	Present	Demersal
Kerreralepis	Blom, 2012	Chordata	Cephalaspidomorphi	Anaspida	ANASPIDA		D	Gedi	D	Gedi	Nektic	Eunekton	Compressiform	1	Blom, 2012	Absent	Demersal
Pharyngolepis	Blom, 2012	Chordata	Cephalaspidomorphi	Anaspida	ANASPIDA		S	Wenl	S	Ludl	Nektic	Eunekton	Compressiform	1	Blom, 2012	Absent	Demersal
Pterygolepis	Blom, 2012	Chordata	Cephalaspidomorphi	Anaspida	ANASPIDA		S	Wenl	S	Wenl	Nektic	Eunekton	Compressiform	1	Blom, 2012	Absent	Demersal
Rhyncholepis	Blom, 2012	Chordata	Cephalaspidomorphi	Anaspida	ANASPIDA		S	Wenl	S	Ludl	Nektic	Eunekton	Compressiform	1	Blom, 2012	Absent	Demersal
Vilkitskilepis	Blom, 2012	Chordata	Cephalaspidomorphi	Anaspida	ANASPIDA		D	Gedi	D	Gedi	Nektic	Eunekton	Compressiform	1	Blom, 2012	Absent	Demersal
Birkenia	Sepkoski, 2002	Chordata	Cephalaspidomorphi	Anaspida	BIRKENIIFORMES		S	Prid	S	Prid	Nektic	Eunekton	Compressiform	1	Blom, 2012	Present	Demersal
Lasanius	Sepkoski, 2002	Chordata	Cephalaspidomorphi	Anaspida	BIRKENIIFORMES		S	Wenl	S	Wenl	Nektic	Eunekton	Compressiform	1	Blom, 2012	Present	Demersal
Aceraspis	Sansom et al., 2015	Chordata	Cephalaspidomorphi	Osteostraci	ATELASPIDIFORMES		S	Wenl	S	Wenl	Demersal	Nektobenthos	Depressiform	1	Sansom, 2009	Absent	Demersal
Atelaspis	Sepkoski, 2002	Chordata	Cephalaspidomorphi	Osteostraci	ATELASPIDIFORMES		S	Wenl	S	Wenl	Demersal	Nektobenthos	Depressiform	1	Sansom, 2009	Present	Demersal
Hemicyclaspis	Sepkoski, 2002	Chordata	Cephalaspidomorphi	Osteostraci	ATELASPIDIFORMES		S	Ludl-l	S	Prid	Demersal	Nektobenthos	Depressiform	1	Sansom, 2009	Present	Demersal
Hirella	Sansom et al., 2015	Chordata	Cephalaspidomorphi	Osteostraci	ATELASPIDIFORMES		S	Wenl	S	Wenl	Demersal	Nektobenthos	Depressiform	1	Sansom, 2009	Absent	Demersal
Witaaspis	Sepkoski, 2002	Chordata	Cephalaspidomorphi	Osteostraci	ATELASPIDIFORMES		S	Wenl	S	Wenl	Demersal	Nektobenthos	Depressiform	1	Sansom, 2009	Present	Demersal
Belonaspis	Sansom et al., 2015	Chordata	Cephalaspidomorphi	Osteostraci	BENNEVIASPIDIDA	Boreaspididae	D	Sieg	D	Sieg	Demersal	Eudemersus	Depressiform, Elongate Rostral Processes	1	Janvier, 1996; Sansom, 2009	Absent	Demersal
Hoelaspis	Sansom et al., 2015	Chordata	Cephalaspidomorphi	Osteostraci	BENNEVIASPIDIDA	Boreaspididae	D	Gedi	D	Gedi	Demersal	Eudemersus	Depressiform, Elongate Rostral and Cornual Processes	1	Janvier, 1996; Sansom, 2009	Absent	Demersal
Benneviaspis	Sansom et al., 2015	Chordata	Cephalaspidomorphi	Osteostraci	BENNEVIASPIDIDA		D	Gedi	D	Sieg	Demersal	Nektobenthos	Depressiform	1	Sansom, 2009	Absent	Demersal
Boreaspis	Sansom et al., 2015	Chordata	Cephalaspidomorphi	Osteostraci	BENNEVIASPIDIDA		D	Sieg	D	Sieg	Demersal	Eudemersus	Depressiform, Elongate Rostral and Cornual Processes	1	Janvier, 1996; Sansom, 2009	Absent	Demersal
Dicranaspis	Sansom et al., 2015	Chordata	Cephalaspidomorphi	Osteostraci	BENNEVIASPIDIDA		D	Sieg	D	Emsi	Demersal	Eudemersus	Depressiform, Elongate Rostral Processes	1	Janvier, 1996; Sansom, 2009	Absent	Demersal
Ectinaspis	Sansom et al., 2015	Chordata	Cephalaspidomorphi	Osteostraci	BENNEVIASPIDIDA		D	Gedi	D	Gedi	Demersal	Nektobenthos	Depressiform	1	Sansom, 2009	Absent	Demersal
Hapilaspis	Sansom et al., 2015	Chordata	Cephalaspidomorphi	Osteostraci	BENNEVIASPIDIDA		D	Sieg	D	Sieg	Demersal	Nektobenthos	Depressiform	1	Sansom, 2009	Absent	Demersal
Securiaspis	Sansom et al., 2015	Chordata	Cephalaspidomorphi	Osteostraci	BENNEVIASPIDIDA		D	Gedi	D	Sieg	Demersal	Nektobenthos	Depressiform	1	Sansom, 2009	Absent	Demersal
Severaspis	Sansom et al., 2015	Chordata	Cephalaspidomorphi	Osteostraci	BENNEVIASPIDIDA		D	Sieg	D	Sieg	Demersal	Eudemersus	Depressiform, Elongate Rostral and Cornual Processes	1	Janvier, 1996; Sansom, 2009	Absent	Demersal
Spatulaspis	Sansom et al., 2015	Chordata	Cephalaspidomorphi	Osteostraci	BENNEVIASPIDIDA		D	Gedi	D	Emsi	Demersal	Eudemersus	Depressiform, Elongate Rostral Processes	1	Janvier, 1996; Sansom, 2009	Absent	Demersal
Tauraspis	Sansom et al., 2015	Chordata	Cephalaspidomorphi	Osteostraci	BENNEVIASPIDIDA		D	Gedi	D	Gedi	Demersal	Nektobenthos	Depressiform, Elongate Forward-Oriented Cornual Processes	1	Sansom, 2009	Absent	Demersal
Aachenaspis	Sepkoski, 2002	Chordata	Cephalaspidomorphi	Osteostraci	CEPHALASPIDOFORMES		S	Prid	S	Prid	Demersal	Nektobenthos	Depressiform	1	Sansom, 2009	Present	Demersal
Darmuthia	Sepkoski, 2002	Chordata	Cephalaspidomorphi	Osteostraci	CEPHALASPIDOFORMES		S	Ludl-l	S	Ludl-l	Demersal	Eudemersus	Round Head, Dorsal Orbits	1	Sansom, 2009	Present	Demersal
Didymaspis	Sepkoski, 2002	Chordata	Cephalaspidomorphi	Osteostraci	CEPHALASPIDOFORMES		S	Prid	D	Gedi	Demersal	Nektobenthos	Depressiform	1	Sansom, 2009	Present	Demersal
Fieldingaspis	Sepkoski, 2002	Chordata	Cephalaspidomorphi	Osteostraci	CEPHALASPIDOFORMES		D	Gedi-l	D	Gedi-l	Demersal	Nektobenthos	Depressiform	1	Sansom, 2009	Present	Demersal
Ilemoraspis	Sepkoski, 2002	Chordata	Cephalaspidomorphi	Osteostraci	CEPHALASPIDOFORMES		D	Give	D	Give	Demersal	Nektobenthos	Depressiform	1	Sansom, 2009	Present	Demersal
incertae sedis	Sepkoski, 2002	Chordata	Cephalaspidomorphi	Osteostraci	CEPHALASPIDOFORMES		O	Cara-l	O	Cara-l	Demersal	Nektobenthos	Depressiform	1	Sansom, 2009	Present	Demersal
Oeselaspis	Sepkoski, 2002	Chordata	Cephalaspidomorphi	Osteostraci	CEPHALASPIDOFORMES		S	Wenl-u	S	Ludl-l	Demersal	Eudemersus	Round Head, Dorsal Orbits	1	Sansom, 2009	Present	Demersal
Procephalaspis	Sepkoski, 2002	Chordata	Cephalaspidomorphi	Osteostraci	CEPHALASPIDOFORMES		S	Ludl	S	Ludl	Demersal	Nektobenthos	Depressiform	1	Sansom, 2009	Present	Demersal
Saaremaaspis	Sepkoski, 2002	Chordata	Cephalaspidomorphi	Osteostraci	CEPHALASPIDOFORMES		S	Wenl-u	S	Wenl-u	Demersal	Eudemersus	Round Head, Dorsal Orbits	1	Sansom, 2009	Present	Demersal
Sclerodus	Sepkoski, 2002	Chordata	Cephalaspidomorphi	Osteostraci	CEPHALASPIDOFORMES		S	Wenl-u	S	Prid	Demersal	Eudemersus	Round Head, Dorsal Orbits	1	Sansom, 2009	Present	Demersal
Tannuaspis	Sepkoski, 2002	Chordata	Cephalaspidomorphi	Osteostraci	CEPHALASPIDOFORMES		D	Gedi	D	Gedi	Demersal	Nektobenthos	Depressiform	1	Sansom, 2009	Present	Demersal
Thyestes	Sepkoski, 2002	Chordata	Cephalaspidomorphi	Osteostraci	CEPHALASPIDOFORMES		S	Prid	S	Prid	Demersal	Nektobenthos	Depressiform	1	Sansom, 2009	Present	Demersal
Timanaspis	Sepkoski, 2002	Chordata	Cephalaspidomorphi	Osteostraci	CEPHALASPIDOFORMES		S	Prid	S	Prid	Demersal	Eudemersus	Round Head, Dorsal Orbits	1	Sansom, 2009	Present	Demersal
Tremataspis	Sepkoski, 2002	Chordata	Cephalaspidomorphi	Osteostraci	CEPHALASPIDOFORMES		S	Wenl-u	S	Prid	Demersal	Eudemersus	Round Head, Dorsal Orbits	1	Sansom, 2009	Present	Demersal
Tuvaspis	Sepkoski, 2002	Chordata	Cephalaspidomorphi	Osteostraci	CEPHALASPIDOFORMES		S	Prid	S	Prid	Demersal	Nektobenthos	Depressiform	1	Sansom, 2009	Present	Demersal
Tyriaspis	Sepkoski, 2002	Chordata	Cephalaspidomorphi	Osteostraci	CEPHALASPIDOFORMES		S	Prid	S	Prid	Demersal	Eudemersus	Round Head, Dorsal Orbits	1	Sansom, 2009	Present	Demersal
Acrotomaspis	Sansom et al., 2015	Chordata	Cephalaspidomorphi	Osteostraci	THYESTIIDA		D	Sieg	D	Sieg	Demersal	Nektobenthos	Depressiform	1	Sansom, 2009	Absent	Demersal
Aestiaspis	Sansom et al., 2015	Chordata	Cephalaspidomorphi	Osteostraci	THYESTIIDA		S	Wenl	S	Ludl	Demersal	Eudemersus	Round Head, Dorsal Orbits	1	Sansom, 2009	Absent	Demersal
Auchenaspis	Sansom et al., 2015	Chordata	Cephalaspidomorphi	Osteostraci	THYESTIIDA		S	Prid	D	Sieg	Demersal	Nektobenthos	Depressiform	1	Sansom, 2009	Absent	Demersal
Axinaspis	Sansom et al., 2015	Chordata	Cephalaspidomorphi	Osteostraci	THYESTIIDA		D	Sieg	D	Sieg	Demersal	Nektobenthos	Depressiform	1	Sansom, 2009	Absent	Demersal
Dobraspis	Sansom et al., 2015	Chordata	Cephalaspidomorphi	Osteostraci	THYESTIIDA		D	Emsi	D	Emsi	Demersal	Eudemersus	Round Head, Dorsal Orbits	1	Sansom, 2009	Absent	Demersal
Gustavaspis	Sansom et al., 2015	Chordata	Cephalaspidomorphi	Osteostraci	THYESTIIDA		D	Emsi	D	Emsi	Demersal	Nektobenthos	Depressiform	1	Sansom, 2009	Absent	Demersal
Kiaeraspis	Sansom et al., 2015	Chordata	Cephalaspidomorphi	Osteostraci	THYESTIIDA		D	Gedi	D	Gedi	Demersal	Nektobenthos	Depressiform	1	Sansom, 2009	Absent	Demersal
Nectaspis	Sansom et al., 2015	Chordata	Cephalaspidomorphi	Osteostraci	THYESTIIDA		D	Sieg	D	Emsi	Demersal	Nektobenthos	Depressiform	1	Sansom, 2009	Absent	Demersal
Norselaspis	Sansom et al., 2015	Chordata	Cephalaspidomorphi	Osteostraci	THYESTIIDA		D	Sieg	D	Sieg	Demersal	Nektobenthos	Depressiform	1	Sansom, 2009	Absent	Demersal
Balticaspis	Sansom et al., 2015	Chordata	Cephalaspidomorphi	Osteostraci	ZENASPIDA		D	Eife	D	Eife	Demersal	Nektobenthos	Depressiform	1	Sansom, 2009	Absent	Demersal
Diademaspis	Sansom et al., 2015	Chordata	Cephalaspidomorphi	Osteostraci	ZENASPIDA		D	Sieg	D	Emsi	Demersal	Nektobenthos	Depressiform	1	Sansom, 2009	Absent	Demersal
Escuminaspis	Sansom et al., 2015	Chordata	Cephalaspidomorphi	Osteostraci	ZENASPIDA		D	Fras	D	Fras	Demersal	Nektobenthos	Depressiform	1	Sansom, 2009	Absent	Demersal
Levesquaspis	Sansom et al., 2015	Chordata	Cephalaspidomorphi	Osteostraci	ZENASPIDA		D	Fras	D	Fras	Demersal	Nektobenthos	Depressiform	1	Sansom, 2009	Absent	Demersal
Machairaspis	Sansom et al., 2015	Chordata	Cephalaspidomorphi	Osteostraci	ZENASPIDA		D	Gedi	D	Sieg	Demersal	Nektobenthos	Depressiform	1	Sansom, 2009	Absent	Demersal
Parameteoraspis	Sansom et al., 2015	Chordata	Cephalaspidomorphi	Osteostraci	ZENASPIDA		D	Gedi	D	Emsi	Demersal	Nektobenthos	Depressiform	1	Sansom, 2009	Absent	Demersal
Scolenaspis	Sansom et al., 2015	Chordata	Cephalaspidomorphi	Osteostraci	ZENASPIDA		D	Gedi	D	Sieg	Demersal	Nektobenthos	Depressiform	1	Sansom, 2009	Absent	Demersal
Spangenhelmaspis	Sansom et al., 2015	Chordata	Cephalaspidomorphi	Osteostraci	ZENASPIDA		D	Gedi	D	Gedi	Demersal	Nektobenthos	Depressiform	1	Sansom, 2009	Absent	Demersal
Stensiopelta	Sansom et al., 2015	Chordata	Cephalaspidomorphi	Osteostraci	ZENASPIDA		D	Gedi	D	Gedi	Demersal	Nektobenthos	Depressiform	1	Sansom, 2009	Absent	Demersal
Superciliaspis	Sansom et al., 2015	Chordata	Cephalaspidomorphi	Osteostraci	ZENASPIDA		D	Gedi	D	Gedi	Demersal	Nektobenthos	Depressiform	1	Sansom, 2009	Absent	Demersal
Tegaspis	Sansom et al., 2015	Chordata	Cephalaspidomorphi	Osteostraci	ZENASPIDA		D	Gedi	D	Sieg	Demersal	Nektobenthos	Depressiform	1	Sansom, 2009	Absent	Demersal
Trewinia	Sansom et al., 2015	Chordata	Cephalaspidomorphi	Osteostraci	ZENASPIDA		D	Eife	D	Eife	Demersal	Nektobenthos	Depressiform	1	Sansom, 2009	Absent	Demersal
Ukrainaspis	Sansom et al., 2015	Chordata	Cephalaspidomorphi	Osteostraci	ZENASPIDA		D	Gedi	D	Sieg	Demersal	Nektobenthos	Depressiform	1	Sansom, 2009	Absent	Demersal
Wladysagitta	Sansom et al., 2015	Chordata	Cephalaspidomorphi	Osteostraci	ZENASPIDA		D	Gedi	D	Sieg	Demersal	Nektobenthos	Depressiform	1	Sansom, 2009	Absent	Demersal
Zenaspis	Sansom et al., 2015	Chordata	Cephalaspidomorphi	Osteostraci	ZENASPIDA		D	Gedi	D	Sieg	Demersal	Nektobenthos	Depressiform	1	Sansom, 2009	Absent	Demersal
Camptaspis	Sansom et al., 2015	Chordata	Cephalaspidomorphi	Osteostraci			D	Emsi	D	Emsi	Demersal	Nektobenthos	Depressiform	1	Sansom, 2009	Absent	Demersal
Cephalaspis	Sansom et al., 2015	Chordata	Cephalaspidomorphi	Osteostraci			D	Gedi	D	Gedi	Demersal	Nektobenthos	Depressiform	1	Sansom, 2009	Absent	Demersal
Hildenaspis	Sansom et al., 2015	Chordata	Cephalaspidomorphi	Osteostraci			D	Emsi	D	Emsi	Demersal	Nektobenthos	Depressiform	1	Sansom, 2009	Absent	Demersal
Mimetaspis	Sansom et al., 2015	Chordata	Cephalaspidomorphi	Osteostraci			D	Gedi	D	Gedi	Demersal	Nektobenthos	Depressiform	1	Sansom, 2009	Absent	Demersal
Pattenaspis	Sansom et al., 2015	Chordata	Cephalaspidomorphi	Osteostraci			D	Gedi	D	Sieg	Demersal	Nektobenthos	Depressiform	1	Sansom, 2009	Absent	Demersal
Waengsjoeaspis	Sansom et al., 2015	Chordata	Cephalaspidomorphi	Osteostraci			D	Gedi	D	Gedi	Demersal	Nektobenthos	Depressiform	1	Sansom, 2009	Absent	Demersal
Yvonaspis	Sansom et al., 2015	Chordata	Cephalaspidomorphi	Osteostraci			D	Emsi	D	Emsi	Demersal	Nektobenthos	Depressiform	1	Sansom, 2009	Absent	Demersal
Zychaspis	Sansom et al., 2015	Chordata	Cephalaspidomorphi	Osteostraci			D	Gedi	D	Gedi	Demersal	Nektobenthos	Depressiform	1	Sansom, 2009	Absent	Demersal
Myxinikela	Sepkoski, 2002	Chordata	Cephalaspidomorphi		MYXINIFORMES		C	Mosc-u	C	Mosc-u	Demersal	Nektobenthos	Extant Taxa, Anguilliform	0.75	Aleyev, 1977	Present	Demersal
Hardistiella	Sepkoski, 2002	Chordata	Cephalaspidomorphi		PETROMYZONIFORMES		C	Serp-l	C	Serp-l	Nektic	Planktonekton	Extant Marine Taxa, Dorsal Fin, No Lateral Fins, Tubular	0.5	Helfman et al., 2009	Present	Demersal
Mayomyzon	Sepkoski, 2002	Chordata	Cephalaspidomorphi		PETROMYZONIFORMES		C	Mosc-u	C	Mosc-u	Nektic	Planktonekton	Extant Marine Taxa, Dorsal Fin, No Lateral Fins, Tubular	0.5	Helfman et al., 2009	Present	Demersal
Pikaia	Sepkoski, 2002	Chordata	Cephalochordata		uncertain		Cm	mMid-u	Cm	mMid-u	Demersal	Nektobenthos	Anguilliform	0.5	Conway Morris & Caron, 2012	Present	Demersal
Yunnanozoon	Sepkoski, 2002	Chordata	Cephalochordata		uncertain		Cm	Atda-u	Cm	Atda-u	Nektic	Planktonekton	Compressed, Pronounced Dorsal Fin	0.5	Chen et al., 1995	Present	Demersal
Cladoselache	Sepkoski, 2002	Chordata	Chondrichthyes	Cladodontomorphi	CLADOSELACHIDA	Cladoselachidae	D	Fame-u	D	Fame-u	Nektic	Eunekton	Fusiform, Thunniform	1	Zangerl, 1981	Present	Nektic
Monocladodus	Sepkoski, 2002	Chordata	Chondrichthyes	Cladodontomorphi	CLADOSELACHIDA	Cladoselachidae	D	Fame	D	Fame	Nektic	Eunekton	Fusiform, Thunniform	1	Zangerl, 1981	Present	Nektic
Iberolepis	Sepkoski, 2002	Chordata	Chondrichthyes	Cladodontomorphi	CLADOSELACHIDA		D	Gedi-l	D	Sieg-l	Nektic	Eunekton	Fusiform, Thunniform	1	Zangerl, 1981	Present	Nektic
Lunalepis	Sepkoski, 2002	Chordata	Chondrichthyes	Cladodontomorphi	CLADOSELACHIDA		D	Gedi-l	D	Sieg-l	Nektic	Eunekton	Fusiform, Thunniform	1	Zangerl, 1981	Present	Nektic
Cladodoides	Ginter et al., 2010	Chordata	Chondrichthyes	Cladodontomorphi	CTENACANTHIDA	Ctenacanthidae	D	Fras-u	D	Fame-m	Nektic	Eunekton	Somewhat Fusiform, Thunniform	0.75	Zangerl, 1981	Absent	Nektic
Cladodus	Ginter et al., 2010	Chordata	Chondrichthyes	Cladodontomorphi	CTENACANTHIDA	Ctenacanthidae	C	Tour	C	Vise	Nektic	Eunekton	Somewhat Fusiform, Thunniform	0.75	Zangerl, 1981	Absent	Nektic
Ctenacanthus	Sepkoski, 2002	Chordata	Chondrichthyes	Cladodontomorphi	CTENACANTHIDA	Ctenacanthidae	D	Give-l	C	Vise-u	Nektic	Eunekton	Somewhat Fusiform, Thunniform	0.75	Zangerl, 1981	Present	Nektic
Glikmanius	Ginter et al., 2010	Chordata	Chondrichthyes	Cladodontomorphi	CTENACANTHIDA	Ctenacanthidae	C	u	P	Guad	Nektic	Eunekton	Somewhat Fusiform, Thunniform	0.75	Zangerl, 1981	Absent	Nektic
Dabasacanthus	Sepkoski, 2002	Chordata	Chondrichthyes	Cladodontomorphi	CTENACANTHIDA	Lonchidiidae	C	Mosc-u	C	Mosc-u	Nektic	Eunekton	Somewhat Fusiform, Thunniform	0.75	Zangerl, 1981	Present	Nektic
Lissodus	Sepkoski, 2002	Chordata	Chondrichthyes	Cladodontomorphi	CTENACANTHIDA	Lonchidiidae	C	Vise	K	Maes	Nektic	Eunekton	Somewhat Fusiform, Thunniform	0.75	Zangerl, 1981	Present	Nektic
Tristychius	Sepkoski, 2002	Chordata	Chondrichthyes	Cladodontomorphi	CTENACANTHIDA	Lonchidiidae	C	Vise	C	Vise	Nektic	Eunekton	Somewhat Fusiform, Thunniform	0.75	Zangerl, 1981	Present	Nektic
Phoebodus	Sepkoski, 2002	Chordata	Chondrichthyes	Cladodontomorphi	CTENACANTHIDA	Phoebodontidae	D	Eife-u	Tr	Rhae	Nektic	Eunekton	Somewhat Fusiform, Thunniform	0.75	Zangerl, 1981	Present	Nektic
Sphenacanthus	Sepkoski, 2002	Chordata	Chondrichthyes	Cladodontomorphi	CTENACANTHIDA	Sphenacanthidae	C	Ms	P	?	Nektic	Eunekton	Somewhat Fusiform, Thunniform	0.75	Zangerl, 1981	Present	Nektic
"Ctenacanthus"	Ginter et al., 2010	Chordata	Chondrichthyes	Cladodontomorphi	CTENACANTHIDA		C	Vise	C	Vise	Nektic	Eunekton	Somewhat Fusiform, Thunniform	0.75	Zangerl, 1981	Absent	Nektic
Acandylacanthus	Sepkoski, 2002	Chordata	Chondrichthyes	Cladodontomorphi	CTENACANTHIDA		C	Tour-l	C	Tour-l	Nektic	Eunekton	Somewhat Fusiform, Thunniform	0.75	Zangerl, 1981	Present	Nektic
Anaclitacanthus	Sepkoski, 2002	Chordata	Chondrichthyes	Cladodontomorphi	CTENACANTHIDA		C	Tour-u	C	Tour-u	Nektic	Eunekton	Somewhat Fusiform, Thunniform	0.75	Zangerl, 1981	Present	Nektic
Arauzia	Sepkoski, 2002	Chordata	Chondrichthyes	Cladodontomorphi	CTENACANTHIDA		D	Gedi-l	D	Gedi-l	Nektic	Eunekton	Somewhat Fusiform, Thunniform	0.75	Zangerl, 1981	Present	Nektic
Arctacanthus	Sepkoski, 2002	Chordata	Chondrichthyes	Cladodontomorphi	CTENACANTHIDA		P	Guad-u	P	Guad-u	Nektic	Eunekton	Somewhat Fusiform, Thunniform	0.75	Zangerl, 1981	Present	Nektic
Cratoselache	Sepkoski, 2002	Chordata	Chondrichthyes	Cladodontomorphi	CTENACANTHIDA		C	Vise-l	C	Vise-l	Nektic	Eunekton	Somewhat Fusiform, Thunniform	0.75	Zangerl, 1981	Present	Nektic
Dicrenodus	Sepkoski, 2002	Chordata	Chondrichthyes	Cladodontomorphi	CTENACANTHIDA		C	Vise-u	C	Bash-u	Nektic	Eunekton	Somewhat Fusiform, Thunniform	0.75	Zangerl, 1981	Present	Nektic
Eoorodus	Sepkoski, 2002	Chordata	Chondrichthyes	Cladodontomorphi	CTENACANTHIDA		D	Fame-u	D	Fame-u	Nektic	Eunekton	Somewhat Fusiform, Thunniform	0.75	Zangerl, 1981	Present	Nektic
Goodrichthys	Ginter et al., 2010	Chordata	Chondrichthyes	Cladodontomorphi	CTENACANTHIDA		C	Vise	C	Vise	Nektic	Eunekton	Somewhat Fusiform, Thunniform	0.75	Zangerl, 1981	Absent	Nektic
Heslerodus	Ginter et al., 2010	Chordata	Chondrichthyes	Cladodontomorphi	CTENACANTHIDA		C	Bash	P	Asse	Nektic	Eunekton	Somewhat Fusiform, Thunniform	0.75	Zangerl, 1981	Absent	Nektic
Holmesella	Sepkoski, 2002	Chordata	Chondrichthyes	Cladodontomorphi	CTENACANTHIDA		C	u	C	Step-l	Nektic	Eunekton	Somewhat Fusiform, Thunniform	0.75	Zangerl, 1981	Present	Nektic
Hybocladodus	Sepkoski, 2002	Chordata	Chondrichthyes	Cladodontomorphi	CTENACANTHIDA		C	Tour-u	C	Tour-u	Nektic	Eunekton	Somewhat Fusiform, Thunniform	0.75	Zangerl, 1981	Present	Nektic
Lambdodus	Sepkoski, 2002	Chordata	Chondrichthyes	Cladodontomorphi	CTENACANTHIDA		C	Tour-u	C	Tour-u	Nektic	Eunekton	Somewhat Fusiform, Thunniform	0.75	Zangerl, 1981	Present	Nektic
Mesodmodus	Sepkoski, 2002	Chordata	Chondrichthyes	Cladodontomorphi	CTENACANTHIDA		C	Tour-l	C	Tour-l	Nektic	Eunekton	Somewhat Fusiform, Thunniform	0.75	Zangerl, 1981	Present	Nektic
Onychoselache	Sepkoski, 2002	Chordata	Chondrichthyes	Cladodontomorphi	CTENACANTHIDA		C	Vise-l	C	Vise-l	Demersal	Eudemersus	Somewhat Flattened Venter, Expanded Pectoral Fins, Chaemeroid-like	0.75	Zangerl, 1981	Present	Nektic
Petrodus	Sepkoski, 2002	Chordata	Chondrichthyes	Cladodontomorphi	CTENACANTHIDA		C	Vise-l	C	Mosc-u	Nektic	Eunekton	Somewhat Fusiform, Thunniform	0.75	Zangerl, 1981	Present	Nektic
Protacodus	Sepkoski, 2002	Chordata	Chondrichthyes	Cladodontomorphi	CTENACANTHIDA		D	Fras-u	D	Fame-u	Nektic	Eunekton	Somewhat Fusiform, Thunniform	0.75	Zangerl, 1981	Present	Nektic
Saivodus	Ginter et al., 2010	Chordata	Chondrichthyes	Cladodontomorphi	CTENACANTHIDA		C	Vise	C	Serp	Nektic	Eunekton	Somewhat Fusiform, Thunniform	0.75	Zangerl, 1981	Absent	Nektic
Trichorhipis	Sepkoski, 2002	Chordata	Chondrichthyes	Cladodontomorphi	CTENACANTHIDA		C	Mosc-u	C	Mosc-u	Nektic	Eunekton	Somewhat Fusiform, Thunniform	0.75	Zangerl, 1981	Present	Nektic
Wodnika	Sepkoski, 2002	Chordata	Chondrichthyes	Cladodontomorphi	CTENACANTHIDA		P	Guad-l	P	Guad-l	Nektic	Eunekton	Somewhat Fusiform, Thunniform	0.75	Zangerl, 1981	Present	Nektic
Squatinactis	Sepkoski, 2002	Chordata	Chondrichthyes	Cladodontomorphi	SQUATINACTIDA	Squatinactidae	C	Serp-l	C	Serp-l	Demersal	Nektobenthos	Depressiform, Batoid-like, Rajiform	1	Lund, 1990	Present	Nektic
Tamiobatis	Sepkoski, 2002	Chordata	Chondrichthyes	Cladodontomorphi	SYMMORIIDA	Ctenacanthidae	D	Fame	C	Vise-u	Nektic	Eunekton	Fusiform, Terminal Mouth, Thunniform	1	Zangerl, 1981	Present	Nektic
Damocles	Ginter et al., 2010	Chordata	Chondrichthyes	Cladodontomorphi	SYMMORIIDA	Falcatidae	C	Serp	C	Serp	Nektic	Eunekton	Fusiform, Terminal Mouth, Thunniform	1	Zangerl, 1981	Absent	Nektic
Denaea	Sepkoski, 2002	Chordata	Chondrichthyes	Cladodontomorphi	SYMMORIIDA	Falcatidae	C	Vise-l	C	Mosc-u	Nektic	Eunekton	Fusiform, Terminal Mouth, Thunniform	1	Zangerl, 1981	Present	Nektic
Falcatus	Sepkoski, 2002	Chordata	Chondrichthyes	Cladodontomorphi	SYMMORIIDA	Falcatidae	C	Tour-l	C	Serp-l	Nektic	Eunekton	Fusiform, Terminal Mouth, Thunniform	1	Zangerl, 1981; Lund, 1990	Present	Nektic
Stethacanthulus	Ginter et al., 2010	Chordata	Chondrichthyes	Cladodontomorphi	SYMMORIIDA	Falcatidae	C	Mosc	P	Sakm	Nektic	Eunekton	Fusiform, Terminal Mouth, Thunniform	1	Zangerl, 1981	Absent	Nektic
Cobelodus	Sepkoski, 2002	Chordata	Chondrichthyes	Cladodontomorphi	SYMMORIIDA	Symmoriidae	C	Mosc-u	C	Mosc-u	Nektic	Eunekton	Fusiform, Terminal Mouth, Thunniform	1	Zangerl, 1981	Present	Nektic
Orestiacanthus	Sepkoski, 2002	Chordata	Chondrichthyes	Cladodontomorphi	SYMMORIIDA	Symmoriidae	C	Serp-l	C	Serp-l	Nektic	Eunekton	Fusiform, Terminal Mouth, Thunniform	1	Zangerl, 1981; Lund, 1990	Present	Nektic
Stethacanthus	Sepkoski, 2002	Chordata	Chondrichthyes	Cladodontomorphi	SYMMORIIDA	Symmoriidae	D	Fame-m	C	Mosc-u	Nektic	Eunekton	Fusiform, Terminal Mouth, Thunniform	1	Zangerl, 1981; Lund, 1990	Present	Nektic
Symmorium	Sepkoski, 2002	Chordata	Chondrichthyes	Cladodontomorphi	SYMMORIIDA	Symmoriidae	D	Fame-u	C	Mosc-u	Nektic	Eunekton	Fusiform, Terminal Mouth, Thunniform	1	Zangerl, 1981	Present	Nektic
Bebhacanthus	Sepkoski, 2002	Chordata	Chondrichthyes	Cladodontomorphi	SYMMORIIDA		C	Mosc-u	C	Mosc-u	Nektic	Eunekton	Fusiform, Terminal Mouth, Thunniform	1	Zangerl, 1981	Present	Nektic
Desmiodus	Sepkoski, 2002	Chordata	Chondrichthyes	Euchondrocephali	DESMIODONTIDA		C	Vise-u	C	Vise-u	Demersal	Nektobenthos	Elongate, Amiiform	0.75	Zangerl, 1981	Present	Nektic
Heteropetalus	Sepkoski, 2002	Chordata	Chondrichthyes	Euchondrocephali	DESMIODONTIDA		C	Serp-l	C	Serp-l	Demersal	Nektobenthos	Elongate, Amiiform	0.75	Zangerl, 1981	Present	Nektic
Agassizodus	Sepkoski, 2002	Chordata	Chondrichthyes	Euchondrocephali	EUGENEODONTIDA	Agassizodontidae	C	Serp-l	C	Mosc-u	Nektic	Eunekton	Fusiform, Thunniform - Subcarangiform	1	Zangerl, 1981	Present	Nektic
Campyloprion	Sepkoski, 2002	Chordata	Chondrichthyes	Euchondrocephali	EUGENEODONTIDA	Agassizodontidae	C	Step	C	Step	Nektic	Eunekton	Fusiform, Thunniform - Subcarangiform	1	Zangerl, 1981	Present	Nektic
Helicoprion	Sepkoski, 2002	Chordata	Chondrichthyes	Euchondrocephali	EUGENEODONTIDA	Agassizodontidae	P	l	P	Guad-u	Nektic	Eunekton	Fusiform, Thunniform - Subcarangiform	1	Zangerl, 1981	Present	Nektic
Parahelicoprion	Sepkoski, 2002	Chordata	Chondrichthyes	Euchondrocephali	EUGENEODONTIDA	Agassizodontidae	P	l	P	Leon	Nektic	Eunekton	Fusiform, Thunniform - Subcarangiform	1	Zangerl, 1981	Present	Nektic
Sarcoprion	Sepkoski, 2002	Chordata	Chondrichthyes	Euchondrocephali	EUGENEODONTIDA	Agassizodontidae	P	Guad-u	P	Guad-u	Nektic	Eunekton	Fusiform, Thunniform - Subcarangiform	1	Zangerl, 1981	Present	Nektic
Caseodus	Sepkoski, 2002	Chordata	Chondrichthyes	Euchondrocephali	EUGENEODONTIDA	Caseodontidae	C	Mosc-u	C	Mosc-u	Nektic	Eunekton	Fusiform, Thunniform - Subcarangiform	1	Zangerl, 1981	Present	Nektic
Erikodus	Sepkoski, 2002	Chordata	Chondrichthyes	Euchondrocephali	EUGENEODONTIDA	Caseodontidae	P	Guad-u	P	Guad-u	Nektic	Eunekton	Fusiform, Thunniform - Subcarangiform	1	Zangerl, 1981	Present	Nektic
Fadenia	Sepkoski, 2002	Chordata	Chondrichthyes	Euchondrocephali	EUGENEODONTIDA	Caseodontidae	C	Step-l	C	Step-l	Nektic	Eunekton	Fusiform, Thunniform - Subcarangiform	1	Zangerl, 1981	Present	Nektic
Ornithoprion	Sepkoski, 2002	Chordata	Chondrichthyes	Euchondrocephali	EUGENEODONTIDA	Caseodontidae	C	Mosc-u	C	Mosc-u	Nektic	Eunekton	Fusiform, Thunniform - Subcarangiform	1	Zangerl, 1981	Present	Nektic
Pirodus	Ginter et al., 2010	Chordata	Chondrichthyes	Euchondrocephali	EUGENEODONTIDA	Caseodontidae	C	Mosc	C	Mosc	Nektic	Eunekton	Fusiform, Thunniform - Subcarangiform	1	Zangerl, 1981	Absent	Nektic
Romerodus	Sepkoski, 2002	Chordata	Chondrichthyes	Euchondrocephali	EUGENEODONTIDA	Caseodontidae	C	Mosc-u	C	Mosc-u	Nektic	Eunekton	Fusiform, Thunniform - Subcarangiform	1	Zangerl, 1981	Present	Nektic
Campodus	Sepkoski, 2002	Chordata	Chondrichthyes	Euchondrocephali	EUGENEODONTIDA	Caseodontoidea	C	Vise-u	C	Mosc	Nektic	Eunekton	Fusiform, Thunniform - Subcarangiform	1	Zangerl, 1981	Present	Nektic
Chiastodus	Sepkoski, 2002	Chordata	Chondrichthyes	Euchondrocephali	EUGENEODONTIDA	Caseodontoidea	C	Mosc	C	Mosc	Nektic	Eunekton	Fusiform, Thunniform - Subcarangiform	1	Zangerl, 1981	Present	Nektic
Tiaraju	Ginter et al., 2010	Chordata	Chondrichthyes	Euchondrocephali	EUGENEODONTIDA	Caseodontoidea	P	Guad	P	Guad	Nektic	Eunekton	Fusiform, Thunniform - Subcarangiform	1	Zangerl, 1981	Absent	Nektic
Edestus	Sepkoski, 2002	Chordata	Chondrichthyes	Euchondrocephali	EUGENEODONTIDA	Edestidae	C	Serp-l	P	l	Nektic	Eunekton	Fusiform, Thunniform - Subcarangiform	1	Zangerl, 1981	Present	Nektic
Helicampodus	Sepkoski, 2002	Chordata	Chondrichthyes	Euchondrocephali	EUGENEODONTIDA	Edestidae	P	Guad-u	Tr	Indu	Nektic	Eunekton	Fusiform, Thunniform - Subcarangiform	1	Zangerl, 1981	Present	Nektic
Lestrodus	Sepkoski, 2002	Chordata	Chondrichthyes	Euchondrocephali	EUGENEODONTIDA	Edestidae	C	Bash-l	C	Bash-l	Nektic	Eunekton	Fusiform, Thunniform - Subcarangiform	1	Zangerl, 1981	Present	Nektic
Syntomodus	Ginter et al., 2010	Chordata	Chondrichthyes	Euchondrocephali	EUGENEODONTIDA	Edestidae	P	Tatr	P	Tatr	Nektic	Eunekton	Fusiform, Thunniform - Subcarangiform	1	Zangerl, 1981	Absent	Nektic
Bobbodus	Sepkoski, 2002	Chordata	Chondrichthyes	Euchondrocephali	EUGENEODONTIDA	Eugeneodontidae	C	Mosc-u	C	Step-u	Nektic	Eunekton	Fusiform, Thunniform - Subcarangiform	1	Zangerl, 1981	Present	Nektic
Eugeneodus	Sepkoski, 2002	Chordata	Chondrichthyes	Euchondrocephali	EUGENEODONTIDA	Eugeneodontidae	C	Mosc-u	C	Mosc-u	Nektic	Eunekton	Fusiform, Thunniform - Subcarangiform	1	Zangerl, 1981	Present	Nektic
Gilliodus	Sepkoski, 2002	Chordata	Chondrichthyes	Euchondrocephali	EUGENEODONTIDA	Eugeneodontidae	C	Mosc-u	C	Mosc-u	Nektic	Eunekton	Fusiform, Thunniform - Subcarangiform	1	Zangerl, 1981	Present	Nektic
Arpagodus	Sepkoski, 2002	Chordata	Chondrichthyes	Euchondrocephali	EUGENEODONTIDA		C	Mosc-u	C	Mosc-u	Nektic	Eunekton	Fusiform, Thunniform - Subcarangiform	1	Zangerl, 1981	Present	Nektic
Cristatodens	Ginter et al., 2010	Chordata	Chondrichthyes	Euchondrocephali	ORODONTIDA	Leiodontidae	C	Tour	C	Vise	Demersal	Eudemersus	Elongate Approaching Eel-like, Small Fins, Subcarangiform Approaching Anguilliform	0.5	Zangerl, 1981	Absent	Nektic
Leiodus	Sepkoski, 2002	Chordata	Chondrichthyes	Euchondrocephali	ORODONTIDA	Leiodontidae	C	Tour-u	C	Tour-u	Demersal	Eudemersus	Elongate Approaching Eel-like, Small Fins, Subcarangiform Approaching Anguilliform	0.5	Zangerl, 1981	Present	Nektic
Orodus	Sepkoski, 2002	Chordata	Chondrichthyes	Euchondrocephali	ORODONTIDA	Orodontidae	C	Tour-l	P	Sakm	Demersal	Eudemersus	Elongate Approaching Eel-like, Small Fins, Subcarangiform Approaching Anguilliform	0.5	Zangerl, 1981	Present	Nektic
Hercynolepis	Sepkoski, 2002	Chordata	Chondrichthyes	Euchondrocephali	ORODONTIDA		D	Fame-m	D	Fame-m	Demersal	Eudemersus	Elongate Approaching Eel-like, Small Fins, Subcarangiform Approaching Anguilliform	0.5	Zangerl, 1981	Present	Nektic
Belantsea	Sepkoski, 2002	Chordata	Chondrichthyes	Euchondrocephali	PETALODONTIDA	Belantseidae	C	Serp-l	C	Serp-l	Nektic	Eunekton	Compressiform, Prominent Ventral Fins	0.75	Lund, 1989	Present	Nektic
Ctenoptychius	Ginter et al., 2010	Chordata	Chondrichthyes	Euchondrocephali	PETALODONTIDA	Belantseidae	C	Mosc	C	Mosc	Nektic	Eunekton	Compressiform Family	0.5	Lund, 1989; Ginter et al., 2010; Grogan, 2014	Absent	Nektic
Netsepoye	Sepkoski, 2002	Chordata	Chondrichthyes	Euchondrocephali	PETALODONTIDA	Belantseidae	C	Serp-l	C	Serp-l	Nektic	Eunekton	Compressiform	0.75	Grogan et al., 2014	Present	Nektic
Fissodus	Sepkoski, 2002	Chordata	Chondrichthyes	Euchondrocephali	PETALODONTIDA	Janassidae	C	l	C	Pn	Demersal	Nektobenthos	Depressiform Family	0.75	Lund, 1989; Ginter et al., 2010	Present	Nektic
Janassa	Sepkoski, 2002	Chordata	Chondrichthyes	Euchondrocephali	PETALODONTIDA	Janassidae	C	Vise-u	P	Guad-u	Demersal	Nektobenthos	Depressiform, Ventral Mouth	1	Lund, 1989	Present	Nektic
Antliodus	Sepkoski, 2002	Chordata	Chondrichthyes	Euchondrocephali	PETALODONTIDA	Petalodontidae	C	Tour-u	C	Vise-u	Nektic	Eunekton	Most Petalodonts Compressiform, Depressed Morphology Potentially Derived	0.25	Lund et al., 2014	Present	Nektic
Chomatodus	Ginter et al., 2010	Chordata	Chondrichthyes	Euchondrocephali	PETALODONTIDA	Petalodontidae	C	Tour	C	Tour	Nektic	Eunekton	Most Petalodonts Compressiform, Depressed Morphology Potentially Derived	0.25	Lund et al., 2014	Absent	Nektic
Glyphanodus	Sepkoski, 2002	Chordata	Chondrichthyes	Euchondrocephali	PETALODONTIDA	Petalodontidae	C	Vise-u	C	Vise-u	Nektic	Eunekton	Most Petalodonts Compressiform, Depressed Morphology Potentially Derived	0.25	Lund et al., 2014	Present	Nektic
Petalodus	Sepkoski, 2002	Chordata	Chondrichthyes	Euchondrocephali	PETALODONTIDA	Petalodontidae	C	Tour-l	P	l	Nektic	Eunekton	Most Petalodonts Compressiform, Depressed Morphology Potentially Derived	0.25	Lund et al., 2014	Present	Nektic
Polyrhizodus	Ginter et al., 2010	Chordata	Chondrichthyes	Euchondrocephali	PETALODONTIDA	Petalodontidae	C	Tour	C	Mosc	Nektic	Eunekton	Most Petalodonts Compressiform, Depressed Morphology Potentially Derived	0.25	Lund et al., 2014	Absent	Nektic
Davodus	Ginter et al., 2010	Chordata	Chondrichthyes	Euchondrocephali	PETALODONTIDA	Pristodontidae	C	Vise-u	C	Vise-u	Nektic	Eunekton	Most Petalodonts Compressiform, Depressed Morphology Potentially Derived	0.25	Lund et al., 2014	Absent	Nektic
Megactenopetalus	Sepkoski, 2002	Chordata	Chondrichthyes	Euchondrocephali	PETALODONTIDA	Pristodontidae	P	Leon-u	P	Djhu	Nektic	Eunekton	Most Petalodonts Compressiform, Depressed Morphology Potentially Derived	0.25	Lund et al., 2014	Present	Nektic
Peripristis	Sepkoski, 2002	Chordata	Chondrichthyes	Euchondrocephali	PETALODONTIDA	Pristodontidae	C	Tour-l	P	Guad-l	Nektic	Eunekton	Most Petalodonts Compressiform, Depressed Morphology Potentially Derived	0.25	Lund et al., 2014	Present	Nektic
Petalorhynchus	Ginter et al., 2010	Chordata	Chondrichthyes	Euchondrocephali	PETALODONTIDA	Pristodontidae	C	Tour	C	Serp	Nektic	Eunekton	Most Petalodonts Compressiform, Depressed Morphology Potentially Derived	0.25	Lund et al., 2014	Absent	Nektic
Pristodus	Sepkoski, 2002	Chordata	Chondrichthyes	Euchondrocephali	PETALODONTIDA	Pristodontidae	C	Vise-u	C	Vise-u	Nektic	Eunekton	Most Petalodonts Compressiform, Depressed Morphology Potentially Derived	0.25	Lund et al., 2014	Present	Nektic
Siksika	Sepkoski, 2002	Chordata	Chondrichthyes	Euchondrocephali	PETALODONTIDA	Pristodontidae	C	Serp-l	C	Serp-l	Nektic	Eunekton	Most Petalodonts Compressiform, Depressed Morphology Potentially Derived	0.25	Lund et al., 2014	Present	Nektic
Ageleodus	Sepkoski, 2002	Chordata	Chondrichthyes	Euchondrocephali	PETALODONTIDA		C	l	C	Pn	Nektic	Eunekton	Most Petalodonts Compressiform, Depressed Morphology Potentially Derived	0.25	Lund et al., 2014	Present	Nektic
Euglossodus	Sepkoski, 2002	Chordata	Chondrichthyes	Euchondrocephali	PETALODONTIDA		C	Vise-u	C	Vise-u	Nektic	Eunekton	Most Petalodonts Compressiform, Depressed Morphology Potentially Derived	0.25	Lund et al., 2014	Present	Nektic
Mesolophodus	Sepkoski, 2002	Chordata	Chondrichthyes	Euchondrocephali	PETALODONTIDA		C	Vise-u	C	Vise-u	Nektic	Eunekton	Most Petalodonts Compressiform, Depressed Morphology Potentially Derived	0.25	Lund et al., 2014	Present	Nektic
Paracymatodus	Sepkoski, 2002	Chordata	Chondrichthyes	Euchondrocephali	PETALODONTIDA		C	Mosc-u	C	Mosc-u	Nektic	Eunekton	Most Petalodonts Compressiform, Depressed Morphology Potentially Derived	0.25	Lund et al., 2014	Present	Nektic
Serratodus	Sepkoski, 2002	Chordata	Chondrichthyes	Euchondrocephali	PETALODONTIDA		C	Vise-l	C	Vise-l	Nektic	Eunekton	Most Petalodonts Compressiform, Depressed Morphology Potentially Derived	0.25	Lund et al., 2014	Present	Nektic
Harpacodus	Sepkoski, 2002	Chordata	Chondrichthyes	Euchondrocephali	uncertain	Petalodontidae	C	Vise-u	C	Vise-u	Nektic	Eunekton	Most Petalodonts Compressiform, Depressed Morphology Potentially Derived	0.25	Lund et al., 2014	Present	Nektic
Lisgodus	Sepkoski, 2002	Chordata	Chondrichthyes	Euchondrocephali	uncertain	Petalodontidae	C	Tour-u	C	Tour-u	Nektic	Eunekton	Most Petalodonts Compressiform, Depressed Morphology Potentially Derived	0.25	Lund et al., 2014	Present	Nektic
Tanaodus	Sepkoski, 2002	Chordata	Chondrichthyes	Euchondrocephali	uncertain	Petalodontidae	C	l	C	Serp-l	Nektic	Eunekton	Most Petalodonts Compressiform, Depressed Morphology Potentially Derived	0.25	Lund et al., 2014	Present	Nektic
Cynopodius	Ginter et al., 2010	Chordata	Chondrichthyes	Euchondrocephali			C	Serp-l	C	Serp-l	Nektic	Eunekton	Only Known from Teeth, Most Condrichthyans Eunektic	0.25	Zangerl, 1981	Absent	Nektic
Debeerius	Ginter et al., 2010	Chordata	Chondrichthyes	Euchondrocephali			C	Serp	C	Serp	Nektic	Eunekton	Most Euchondrocephali Eunektic	0.25	Zangerl, 1981; Lund et al., 2014	Absent	Nektic
Metaxyacanthus	Ginter et al., 2010	Chordata	Chondrichthyes	Euchondrocephali			C	Step	C	Step	Nektic	Eunekton	Only Known from Spines, Most Chondrichthyans Eunektic	0.25	Zangerl, 1981	Absent	Nektic
Mcmurdodus	Sepkoski, 2002	Chordata	Chondrichthyes	Euselachii	HEXANCHIFORMES	Mcmurdodontidae	D	Eife	D	Give	Nektic	Eunekton	Fusiform	0.75	Zangerl, 1981	Present	Nektic
Acrodus	Ginter et al., 2010	Chordata	Chondrichthyes	Euselachii	HYBODONTIFORMES	Acrodontidae	C	Step	K	Camp-l	Nektic	Eunekton	Fusiform	0.75	Zangerl, 1981	Absent	Nektic
Gansuselache	Ginter et al., 2010	Chordata	Chondrichthyes	Euselachii	HYBODONTIFORMES	Lonchidiidae	P	Tatr	P	Tatr	Nektic	Eunekton	Fusiform	0.75	Zangerl, 1981	Absent	Nektic
Polyacrodus	Ginter et al., 2010	Chordata	Chondrichthyes	Euselachii	HYBODONTIFORMES	Polyacrodontidae	C	Step	K	Sant	Nektic	Eunekton	Fusiform	0.75	Zangerl, 1981	Absent	Nektic
Roongodus	Ginter et al., 2010	Chordata	Chondrichthyes	Euselachii	HYBODONTIFORMES	Polyacrodontidae	D	Fame	D	Fame	Nektic	Eunekton	Fusiform	0.75	Zangerl, 1981	Absent	Nektic
Cassisodus	Ginter et al., 2010	Chordata	Chondrichthyes	Euselachii	HYBODONTIFORMES		C	Tour	C	Vise	Nektic	Eunekton	Fusiform	0.75	Zangerl, 1981	Absent	Nektic
Hamiltonichthys	Ginter et al., 2010	Chordata	Chondrichthyes	Euselachii	HYBODONTIFORMES		C	Step	C	Step	Nektic	Eunekton	Fusiform	0.75	Zangerl, 1981	Absent	Nektic
Synechodus	Ginter et al., 2010	Chordata	Chondrichthyes	Euselachii	SYNECHODONTIFORMES	Paleospinacidae	P	Sakm	Pg	Dani	Nektic	Eunekton	Fusiform	0.75	Zangerl, 1981	Absent	Nektic
Cooleyella	Ginter et al., 2010	Chordata	Chondrichthyes	Euselachii	uncertain	Anachronistidae	C	Vise	P	Leon	Nektic	Eunekton	Fusiform	0.75	Zangerl, 1981	Absent	Nektic
Ginteria	Ginter et al., 2010	Chordata	Chondrichthyes	Euselachii	uncertain	Anachronistidae	C	Vise-u	C	Vise-u	Nektic	Eunekton	Fusiform	0.75	Zangerl, 1981	Absent	Nektic
Dalmehodus	Ginter et al., 2010	Chordata	Chondrichthyes	Euselachii	uncertain	Protacrodontidae	D	Fame	D	Fame	Nektic	Eunekton	Fusiform	0.75	Zangerl, 1981	Absent	Nektic
Deihim	Ginter et al., 2010	Chordata	Chondrichthyes	Euselachii	uncertain	Protacrodontidae	D	Fras	C	u	Nektic	Eunekton	Fusiform	0.75	Zangerl, 1981	Absent	Nektic
Protacrodus	Ginter et al., 2010	Chordata	Chondrichthyes	Euselachii	uncertain	Protacrodontidae	D	Give	C	Tour	Nektic	Eunekton	Fusiform	0.75	Zangerl, 1981	Absent	Nektic
Hopleacanthus	Ginter et al., 2010	Chordata	Chondrichthyes	Euselachii	uncertain		P	Guad	P	Guad	Nektic	Eunekton	Fusiform	0.75	Zangerl, 1981	Absent	Nektic
Vallisia	Ginter et al., 2010	Chordata	Chondrichthyes	Euselachii	uncertain		D	Fame-u	Tr	Rhae	Nektic	Eunekton	Fusiform	0.75	Zangerl, 1981	Absent	Nektic
Similihariotta	Sepkoski, 2002	Chordata	Chondrichthyes	Holocephali	CHIMAERIFORMES	Chimaeridae	C	Mosc-u	C	Mosc-u	Demersal	Eudemersus	Elongate Somewhat Trinagular Rostrum, Comparison to Acipenseridae	0.5	Zangerl, 1981	Present	Nektic
Crassidonta	Sepkoski, 2002	Chordata	Chondrichthyes	Holocephali	CHIMAERIFORMES	Cochliodontidae	P	l	P	Leon	Demersal	Eudemersus	Durophagous	0.5	Stahl, 1999	Present	Nektic
Deltoptychius	Sepkoski, 2002	Chordata	Chondrichthyes	Holocephali	CHIMAERIFORMES	Deltoptychiidae	C	Vise	C	Serp	Demersal	Eudemersus	Comparison to Extant Chimaerid	1	Stahl, 1999	Present	Nektic
Echinochimaera	Sepkoski, 2002	Chordata	Chondrichthyes	Holocephali	CHIMAERIFORMES	Echinochimaeridae	C	Serp-l	C	Serp-l	Demersal	Eudemersus	Chaemeriform	1	Stahl, 1999	Present	Nektic
Delphyodontos	Sepkoski, 2002	Chordata	Chondrichthyes	Holocephali	CHIMAERIFORMES		C	Serp-l	C	Serp-l	Nektic	Eunekton	Dacriform	0.5	Lund, 1990	Present	Nektic
Solenodus	Sepkoski, 2002	Chordata	Chondrichthyes	Holocephali	CHONDRENCHELYIFORMES	Cochliodontidae	C	Mosc-u	C	Mosc-u	Demersal	Eudemersus	Durophagous	0.25	Stahl, 1999	Present	Nektic
Chondrenchelys	Sepkoski, 2002	Chordata	Chondrichthyes	Holocephali	CHONDRENCHELYIFORMES		C	Vise-l	C	Vise-l	Demersal	Nektobenthos	Elongate, Continuous Dorsal Median Fin, Anguilliform	0.75	Stahl, 1999	Present	Nektic
Harpagofututor	Sepkoski, 2002	Chordata	Chondrichthyes	Holocephali	CHONDRENCHELYIFORMES		C	Serp-l	C	Serp-l	Demersal	Nektobenthos	Elongate, Continuous Dorsal Median Fin, Anguilliform	0.75	Stahl, 1999	Present	Nektic
Helodus	Stahl, 1999	Chordata	Chondrichthyes	Holocephali	CHONDRENCHELYIFORMES		D	Fame	P	l	Demersal	Nektobenthos	Elongate, Continuous Dorsal Median Fin, Anguilliform	0.75	Stahl, 1999	Absent	Nektic
Platyxystrodus	Sepkoski, 2002	Chordata	Chondrichthyes	Holocephali	CHONDRENCHELYIFORMES		C	Tour	C	Mosc-u	Demersal	Nektobenthos	Elongate, Continuous Dorsal Median Fin, Anguilliform	0.75	Stahl, 1999	Present	Nektic
Cochliodus	Stahl, 1999	Chordata	Chondrichthyes	Holocephali	COCHLIODONTIFORMES	Cochliodontidae	C	Tour	C	Serp	Demersal	Eudemersus	Durophagous	0.5	Stahl, 1999	Absent	Nektic
Cyrtonodus	Stahl, 1999	Chordata	Chondrichthyes	Holocephali	COCHLIODONTIFORMES	Cochliodontidae	C	Vise	C	Vise	Demersal	Eudemersus	Durophagous	0.5	Stahl, 1999	Absent	Nektic
Deltodus	Stahl, 1999	Chordata	Chondrichthyes	Holocephali	COCHLIODONTIFORMES	Cochliodontidae	C	Tour	C	Mosc	Demersal	Eudemersus	Durophagous	0.5	Stahl, 1999	Absent	Nektic
Diplacodus	Stahl, 1999	Chordata	Chondrichthyes	Holocephali	COCHLIODONTIFORMES	Cochliodontidae	C	Vise	C	Vise	Demersal	Eudemersus	Durophagous	0.5	Stahl, 1999	Absent	Nektic
Enniskillen	Stahl, 1999	Chordata	Chondrichthyes	Holocephali	COCHLIODONTIFORMES	Cochliodontidae	C	Tour	C	Vise	Demersal	Eudemersus	Durophagous	0.5	Stahl, 1999	Absent	Nektic
Helodopsis	Stahl, 1999	Chordata	Chondrichthyes	Holocephali	COCHLIODONTIFORMES	Cochliodontidae	P	l	P	u	Demersal	Eudemersus	Durophagous	0.5	Stahl, 1999	Absent	Nektic
Poecilodus	Stahl, 1999	Chordata	Chondrichthyes	Holocephali	COCHLIODONTIFORMES	Cochliodontidae	C	Tour	C	Mosc	Demersal	Eudemersus	Durophagous	0.5	Stahl, 1999	Absent	Nektic
Sandalodus	Stahl, 1999	Chordata	Chondrichthyes	Holocephali	COCHLIODONTIFORMES	Cochliodontidae	D	Fame-u	P	Guad	Demersal	Eudemersus	Durophagous	0.5	Stahl, 1999	Absent	Nektic
Thoralodus	Stahl, 1999	Chordata	Chondrichthyes	Holocephali	COCHLIODONTIFORMES	Cochliodontidae	D	Fame	D	Fame	Demersal	Eudemersus	Durophagous	0.5	Stahl, 1999	Absent	Nektic
Psephodus	Stahl, 1999	Chordata	Chondrichthyes	Holocephali	COCHLIODONTIFORMES	Psephodontidae	C	Tour	P	Guad-l	Demersal	Eudemersus	Durophagous	0.5	Stahl, 1999	Absent	Nektic
Chitonodus	Stahl, 1999	Chordata	Chondrichthyes	Holocephali	COCHLIODONTIFORMES		C	Tour	C	Vise	Demersal	Eudemersus	Durophagous	0.5	Stahl, 1999	Absent	Nektic
Cymatodus	Stahl, 1999	Chordata	Chondrichthyes	Holocephali	COCHLIODONTIFORMES		C	Step	C	Step	Demersal	Eudemersus	Durophagous	0.5	Stahl, 1999	Absent	Nektic
Venustodus	Stahl, 1999	Chordata	Chondrichthyes	Holocephali	COCHLIODONTIFORMES		C	Tour	C	Serp	Demersal	Eudemersus	Durophagous	0.5	Stahl, 1999	Absent	Nektic
Acmoniodus	Sepkoski, 2002	Chordata	Chondrichthyes	Holocephali	COPODONTIFORMES		D	Fras-l	D	Fras-l	Demersal	Eudemersus	No Body Fossil, Durophagous Tooth Plates	0.5	Stahl, 1999	Present	Nektic
Copodus	Stahl, 1999	Chordata	Chondrichthyes	Holocephali	COPODONTIFORMES		C	Vise	C	u	Demersal	Eudemersus	No Body Fossil, Durophagous Tooth Plates	0.5	Stahl, 1999	Absent	Nektic
Menaspis	Sepkoski, 2002	Chordata	Chondrichthyes	Holocephali	HOLOCEPHALI INCERTAE SEDIS	Menaspidae	P	Guad-l	P	Guad-l	Demersal	Nektobenthos	Depressiform, Durophagus Tooth Plates	0.75	Stahl, 1999	Present	Nektic
Jimpohlia	Sepkoski, 2002	Chordata	Chondrichthyes	Holocephali	HOLOCEPHALI INCERTAE SEDIS		C	Mosc-u	C	Mosc-u	Demersal	Eudemersus	Comparison to Extant Chimaerid	0.5	Zangerl, 1981; Stahl, 1999	Present	Nektic
Traquairius	Stahl, 1999	Chordata	Chondrichthyes	Holocephali	MENASPIFORMES	Traquariidae	C	Serp	C	Serp	Demersal	Eudemersus	Durophagous, Flattened Venter, Comparison to Extant Chimaerid	0.5	Stahl, 1999	Absent	Nektic
Erismacanthus	Stahl, 1999	Chordata	Chondrichthyes	Holocephali	MENASPIFORMES		C	Tour	C	Mosc	Demersal	Eudemersus	Durophagous, Flattened Venter, Comparison to Extant Chimaerid	0.5	Stahl, 1999	Absent	Nektic
Menaspacanthus	Stahl, 1999	Chordata	Chondrichthyes	Holocephali	MENASPIFORMES		C	Vise	C	Vise	Demersal	Eudemersus	Durophagous, Flattened Venter, Comparison to Extant Chimaerid	0.5	Stahl, 1999	Absent	Nektic
Archaeobatis	Stahl, 1999	Chordata	Chondrichthyes	Holocephali	PSAMMODONTIFORMES		C	Vise	C	Vise	Demersal	Eudemersus	Durophagus Tooth Plates	0.5	Stahl, 1999	Absent	Nektic
Lagarodus	Sepkoski, 2002	Chordata	Chondrichthyes	Holocephali	PSAMMODONTIFORMES		C	Vise	C	Vise	Demersal	Eudemersus	Durophagus Tooth Plates	0.5	Stahl, 1999	Present	Nektic
Psammodus	Sepkoski, 2002	Chordata	Chondrichthyes	Holocephali	PSAMMODONTIFORMES		D	Fame-u	C	Vise	Demersal	Eudemersus	Durophagus Tooth Plates	0.5	Stahl, 1999	Present	Nektic
Eucentrurus	Sepkoski, 2002	Chordata	Chondrichthyes	Holocephali	uncertain	Chondrenchelyidae	C	Vise	C	Vise	Demersal	Nektobenthos	Elongate, Continuous Dorsal Median Fin, Anguilliform	0.75	Stahl, 1999	Present	Nektic
Polysentor	Sepkoski, 2002	Chordata	Chondrichthyes	Holocephali	uncertain	Polysentoridae	C	Mosc-u	C	Mosc-u	Demersal	Eudemersus	Comparison to Extant Chimaerid	0.75	Zangerl, 1981	Present	Nektic
Barbclabornia	Ginter et al., 2010	Chordata	Chondrichthyes	Xenacanthimorpha	BRANSONELLIFORMES		P	Asse	P	Leon	Demersal	Eudemersus	Fusiform, Expanded Elongated Dorsal Fin	0.5	Zangerl, 1981	Absent	Nektic
Bransonella	Ginter et al., 2010	Chordata	Chondrichthyes	Xenacanthimorpha	BRANSONELLIFORMES		C	Vise	P	l	Demersal	Eudemersus	Fusiform, Expanded Elongated Dorsal Fin	0.5	Zangerl, 1981	Absent	Nektic
Dicentrodus	Ginter et al., 2010	Chordata	Chondrichthyes	Xenacanthimorpha	XENACANTHIFORMES	Diplodoselachidae	C	Vise	C	Serp-l	Demersal	Eudemersus	Fusiform, Expanded Elongated Dorsal Fin	0.5	Zangerl, 1981	Absent	Nektic
Diplodoselache	Ginter et al., 2010	Chordata	Chondrichthyes	Xenacanthimorpha	XENACANTHIFORMES	Diplodoselachidae	C	Vise-l	C	Serp-l	Demersal	Eudemersus	Fusiform, Expanded Elongated Dorsal Fin	0.5	Zangerl, 1981	Absent	Nektic
Hagenoselache	Ginter et al., 2010	Chordata	Chondrichthyes	Xenacanthimorpha	XENACANTHIFORMES	Diplodoselachidae	C	Bash	C	Bash	Demersal	Eudemersus	Fusiform, Expanded Elongated Dorsal Fin	0.5	Zangerl, 1981	Absent	Nektic
Lebachacanthus	Ginter et al., 2010	Chordata	Chondrichthyes	Xenacanthimorpha	XENACANTHIFORMES	Diplodoselachidae	C	Step	P	Asse	Demersal	Eudemersus	Fusiform, Expanded Elongated Dorsal Fin	0.5	Zangerl, 1981	Absent	Nektic
Orthacanthus	Ginter et al., 2010	Chordata	Chondrichthyes	Xenacanthimorpha	XENACANTHIFORMES	Diplodoselachidae	C	Bash-u	P	Leon	Demersal	Eudemersus	Fusiform, Expanded Elongated Dorsal Fin	0.5	Zangerl, 1981	Absent	Nektic
Plicatodus	Ginter et al., 2010	Chordata	Chondrichthyes	Xenacanthimorpha	XENACANTHIFORMES	Xenacanthidae	C	Step	P	Asse	Demersal	Eudemersus	Fusiform, Expanded Dorsal Fin, Slender & Compressed	0.5	Zangerl, 1981	Absent	Nektic
Triodus	Ginter et al., 2010	Chordata	Chondrichthyes	Xenacanthimorpha	XENACANTHIFORMES	Xenacanthidae	C	Bash-u	P	Asse	Demersal	Eudemersus	Fusiform, Expanded Dorsal Fin, Slender & Compressed	0.5	Zangerl, 1981	Absent	Nektic
Wurdigneria	Ginter et al., 2010	Chordata	Chondrichthyes	Xenacanthimorpha	XENACANTHIFORMES	Xenacanthidae	P	Leon	P	Guad	Demersal	Eudemersus	Fusiform, Expanded Dorsal Fin, Slender & Compressed	0.5	Zangerl, 1981	Absent	Nektic
Xenacanthus	Ginter et al., 2010	Chordata	Chondrichthyes	Xenacanthimorpha	XENACANTHIFORMES	Xenacanthidae	C	Serp-l	P	Leon	Demersal	Eudemersus	Fusiform, Expanded Dorsal Fin, Slender & Compressed	0.5	Zangerl, 1981	Absent	Nektic
Antarctilamna	Ginter et al., 2010	Chordata	Chondrichthyes		ANTARCTILAMNIFORMES	Antarctilamnidae	D	Give	D	Fras-l	Demersal	Eudemersus	Similar to Xenacanthiformes	0.25	Ginter et al., 2008	Absent	Nektic
Wellerodus	Ginter et al., 2010	Chordata	Chondrichthyes		ANTARCTILAMNIFORMES	Antarctilamnidae	D	Give-u	D	Fras-l	Demersal	Eudemersus	Similar to Xenacanthiformes	0.25	Ginter et al., 2008	Absent	Nektic
Coronodus	Sepkoski, 2002	Chordata	Chondrichthyes		CORONODONTIDA	Coronodontidae	D	Fras-l	D	Fras-l	Nektic	Eunekton	Multicuspid Low Crowned Filter-Feeding Teeth, No Body Fossils	0.75	Zangerl, 1981; Ginter, 2008	Present	Nektic
Diademodus	Sepkoski, 2002	Chordata	Chondrichthyes		CORONODONTIDA	Phoebodontidae	D	Fame-u	D	Fame-u	Nektic	Eunekton	Somewhat Fusiform, Thunniform	0.75	Zangerl, 1981	Present	Nektic
Siamodus	Sepkoski, 2002	Chordata	Chondrichthyes		CORONODONTIDA		D	Fame-u	D	Fame-u	Nektic	Eunekton	Most Chondrichthyans Eunektic, Coronodonts Apparently Likely Eunektic	0.5	Zangerl, 1981	Present	Nektic
incertae sedis	Sepkoski, 2002	Chordata	Chondrichthyes		INIOPTERYGIA		C	Serp-l	C	Serp-l	Demersal	Eudemersus	Chimaeroid-like Morphology (Stout, Short Trunk, Somewhat Flattened Venter)	0.75	Zangerl, 1981	Present	Nektic
Iniopera	Sepkoski, 2002	Chordata	Chondrichthyes		INIOPTERYGIA		C	Mosc-u	C	Mosc-u	Demersal	Eudemersus	Chimaeroid-like Morphology (Stout, Short Trunk, Somewhat Flattened Venter)	0.75	Zangerl, 1981	Present	Nektic
Iniopteryx	Sepkoski, 2002	Chordata	Chondrichthyes		INIOPTERYGIA		C	Mosc-u	C	Mosc-u	Demersal	Eudemersus	Chimaeroid-like Morphology (Stout, Short Trunk, Somewhat Flattened Venter)	0.75	Zangerl, 1981	Present	Nektic
Inioxyle	Sepkoski, 2002	Chordata	Chondrichthyes		INIOPTERYGIA		C	Mosc-u	C	Step-l	Demersal	Eudemersus	Chimaeroid-like Morphology (Stout, Short Trunk, Somewhat Flattened Venter)	0.75	Zangerl, 1981	Present	Nektic
Promexyele	Sepkoski, 2002	Chordata	Chondrichthyes		INIOPTERYGIA		C	Mosc-u	C	Mosc-u	Demersal	Eudemersus	Chimaeroid-like Morphology (Stout, Short Trunk, Somewhat Flattened Venter)	0.75	Zangerl, 1981	Present	Nektic
Sibyrhynchus	Sepkoski, 2002	Chordata	Chondrichthyes		INIOPTERYGIA		C	Mosc-u	C	Mosc-u	Demersal	Eudemersus	Chimaeroid-like Morphology (Stout, Short Trunk, Somewhat Flattened Venter)	0.75	Zangerl, 1981	Present	Nektic
Aztecodus	Ginter et al., 2010	Chordata	Chondrichthyes		OMALODONTIFORMES	Aztecodontidae	D	Give-u	D	Give-u	Nektic	Eunekton	No Body Fossils, Sharp Non-Durophagous Teeth, Most Chondrichthyans Nektic	0.25	Ginter et al., 2008	Absent	Nektic
Manberodus	Ginter et al., 2010	Chordata	Chondrichthyes		OMALODONTIFORMES	Aztecodontidae	D	Fras-l	D	Fras-l	Nektic	Eunekton	No Body Fossils, Sharp Non-Durophagous Teeth, Most Chondrichthyans Nektic	0.25	Ginter et al., 2008	Absent	Nektic
Omalodus	Ginter et al., 2010	Chordata	Chondrichthyes		OMALODONTIFORMES	Omalodontidae	D	Give	D	Fras-l	Nektic	Eunekton	No Body Fossils, Sharp Non-Durophagous Teeth, Most Chondrichthyans Nektic	0.25	Ginter et al., 2008	Absent	Nektic
Portalodus	Ginter et al., 2010	Chordata	Chondrichthyes		OMALODONTIFORMES	Omalodontidae	D	Give-u	D	Give-u	Nektic	Eunekton	No Body Fossils, Sharp Non-Durophagous Teeth, Most Chondrichthyans Nektic	0.25	Ginter et al., 2008	Absent	Nektic
Siberiodus	Ginter et al., 2010	Chordata	Chondrichthyes		OMALODONTIFORMES		D	Fras	D	Fame	Nektic	Eunekton	No Body Fossils, Sharp Non-Durophagous Teeth, Most Chondrichthyans Nektic	0.25	Ginter et al., 2008	Absent	Nektic
Jalodus	Ginter et al., 2010	Chordata	Chondrichthyes		PHOEBODONTIFORMES	Jalodontidae	D	Fame	C	Tour	Demersal	Eudemersus	Shallow Water Facies, Similar to Xenacanthiforms	0.25	Ginter et al., 2002	Absent	Nektic
Thrinacodus	Ginter et al., 2010	Chordata	Chondrichthyes		PHOEBODONTIFORMES	Phoebodontidae	D	Fame-m	C	Serp	Demersal	Eudemersus	Shallow Water Facies, Similar to Xenacanthiforms	0.25	Ginter et al., 2002	Absent	Nektic
Adamantina	Ginter et al., 2010	Chordata	Chondrichthyes		uncertain		C	Tour	P	Guad	Nektic	Eunekton	Most Chondrichthyans Eunektic	0.25	Zangerl, 1981	Absent	Nektic
Anachronistes	Sepkoski, 2002	Chordata	Chondrichthyes		uncertain		C	Vise-u	P	Leon	Nektic	Eunekton	Most Chondrichthyans Eunektic	0.25	Zangerl, 1981	Present	Nektic
Arduodens	Ginter et al., 2010	Chordata	Chondrichthyes		uncertain		D	Fras-u	D	Fame-l	Nektic	Eunekton	Most Chondrichthyans Eunektic	0.25	Zangerl, 1981	Absent	Nektic
Carcharopsis	Ginter et al., 2010	Chordata	Chondrichthyes		uncertain		C	Vise	C	Mosc	Nektic	Eunekton	Only Known from Teeth, Most Condrichthyans Eunektic	0.25	Zangerl, 1981	Absent	Nektic
Celtiberina	Ginter et al., 2010	Chordata	Chondrichthyes		uncertain		D	Gedi	D	Gedi	Nektic	Eunekton	Most Chondrichthyans Eunektic	0.25	Zangerl, 1981	Absent	Nektic
Clairina	Ginter et al., 2010	Chordata	Chondrichthyes		uncertain		D	Fame	D	Fame	Nektic	Eunekton	Most Chondrichthyans Eunektic	0.25	Zangerl, 1981	Absent	Nektic
Leonodus	Ginter et al., 2010	Chordata	Chondrichthyes		uncertain		D	Gedi	D	Gedi	Nektic	Eunekton	Most Chondrichthyans Eunektic	0.25	Zangerl, 1981	Absent	Nektic
Leonotus	Sepkoski, 2002	Chordata	Chondrichthyes		uncertain		D	Gedi-l	D	Sieg-l	Nektic	Eunekton	Most Chondrichthyans Eunektic	0.25	Zangerl, 1981	Present	Nektic
Lesnilomia	Ginter et al., 2010	Chordata	Chondrichthyes		uncertain		D	Fras-u	D	Fras-u	Nektic	Eunekton	Multicuspid Low Crowned Filter-Feeding Teeth, No Body Fossils	0.75	Ginter, 2008	Absent	Nektic
Acanthocordylodus	Sepkoski, 2002	Chordata	Conodonta		CONODONTOPHORIDA		O	Cara-l	O	Cara-u	Nektic	Planktonekton	Compressed, Muscular, Finned, Small, Wide-ranging Pelagic Facies	1	Klapper & Barrick, 1978; Briggs et al., 1983; Signor & Vermeij, 1994	Absent	N/A
Acanthodina	Sepkoski, 2002	Chordata	Conodonta		CONODONTOPHORIDA		O	Ashg	O	Ashg	Nektic	Planktonekton	Compressed, Muscular, Finned, Small, Wide-ranging Pelagic Facies	1	Klapper & Barrick, 1978; Briggs et al., 1983; Signor & Vermeij, 1994	Absent	N/A
Acanthodus	Sepkoski, 2002	Chordata	Conodonta		CONODONTOPHORIDA		O	Trem-l	O	Trem-u	Nektic	Planktonekton	Compressed, Muscular, Finned, Small, Wide-ranging Pelagic Facies	1	Klapper & Barrick, 1978; Briggs et al., 1983; Signor & Vermeij, 1994	Absent	N/A
Adetognathus	Sepkoski, 2002	Chordata	Conodonta		CONODONTOPHORIDA		C	Serp-l	P	Sakm-u	Nektic	Planktonekton	Compressed, Muscular, Finned, Small, Wide-ranging Pelagic Facies	1	Klapper & Barrick, 1978; Briggs et al., 1983; Signor & Vermeij, 1994	Absent	N/A
Aethotaxis	Sepkoski, 2002	Chordata	Conodonta		CONODONTOPHORIDA		C	Serp-l	C	Step-u	Nektic	Planktonekton	Compressed, Muscular, Finned, Small, Wide-ranging Pelagic Facies	1	Klapper & Barrick, 1978; Briggs et al., 1983; Signor & Vermeij, 1994	Absent	N/A
Alternognathus	Sepkoski, 2002	Chordata	Conodonta		CONODONTOPHORIDA		D	Fame-m	D	Fame-m	Nektic	Planktonekton	Compressed, Muscular, Finned, Small, Wide-ranging Pelagic Facies	1	Klapper & Barrick, 1978; Briggs et al., 1983; Signor & Vermeij, 1994	Absent	N/A
Amorphognathus	Sepkoski, 2002	Chordata	Conodonta		CONODONTOPHORIDA		O	Aren-u	O	Ashg-u	Nektic	Planktonekton	Compressed, Muscular, Finned, Small, Wide-ranging Pelagic Facies	1	Klapper & Barrick, 1978; Briggs et al., 1983; Signor & Vermeij, 1994	Absent	N/A
Amydrotaxis	Sepkoski, 2002	Chordata	Conodonta		CONODONTOPHORIDA		D	Gedi-l	D	Sieg-l	Nektic	Planktonekton	Compressed, Muscular, Finned, Small, Wide-ranging Pelagic Facies	1	Klapper & Barrick, 1978; Briggs et al., 1983; Signor & Vermeij, 1994	Absent	N/A
Ancoradella	Sepkoski, 2002	Chordata	Conodonta		CONODONTOPHORIDA		S	Ludl-l	S	Ludl-u	Nektic	Planktonekton	Compressed, Muscular, Finned, Small, Wide-ranging Pelagic Facies	1	Klapper & Barrick, 1978; Briggs et al., 1983; Signor & Vermeij, 1994	Absent	N/A
Ancyrodella	Sepkoski, 2002	Chordata	Conodonta		CONODONTOPHORIDA		D	Give-u	D	Fras-u	Nektic	Planktonekton	Compressed, Muscular, Finned, Small, Wide-ranging Pelagic Facies	1	Klapper & Barrick, 1978; Briggs et al., 1983; Signor & Vermeij, 1994	Absent	N/A
Ancyrodelloides	Sepkoski, 2002	Chordata	Conodonta		CONODONTOPHORIDA		D	Gedi-u	D	Gedi-u	Nektic	Planktonekton	Compressed, Muscular, Finned, Small, Wide-ranging Pelagic Facies	1	Klapper & Barrick, 1978; Briggs et al., 1983; Signor & Vermeij, 1994	Absent	N/A
Ancyrognathus	Sepkoski, 2002	Chordata	Conodonta		CONODONTOPHORIDA		D	Fras-m	D	Fame-l	Nektic	Planktonekton	Compressed, Muscular, Finned, Small, Wide-ranging Pelagic Facies	1	Klapper & Barrick, 1978; Briggs et al., 1983; Signor & Vermeij, 1994	Absent	N/A
Ancyrolepis	Sepkoski, 2002	Chordata	Conodonta		CONODONTOPHORIDA		D	Give-u	D	Fame-l	Nektic	Planktonekton	Compressed, Muscular, Finned, Small, Wide-ranging Pelagic Facies	1	Klapper & Barrick, 1978; Briggs et al., 1983; Signor & Vermeij, 1994	Absent	N/A
Angulodus	Sepkoski, 2002	Chordata	Conodonta		CONODONTOPHORIDA		D	Fame	C	Vise-l	Nektic	Planktonekton	Compressed, Muscular, Finned, Small, Wide-ranging Pelagic Facies	1	Klapper & Barrick, 1978; Briggs et al., 1983; Signor & Vermeij, 1994	Absent	N/A
Ansella	Sepkoski, 2002	Chordata	Conodonta		CONODONTOPHORIDA		O	Llvi-l	O	Cara	Nektic	Planktonekton	Compressed, Muscular, Finned, Small, Wide-ranging Pelagic Facies	1	Klapper & Barrick, 1978; Briggs et al., 1983; Signor & Vermeij, 1994	Absent	N/A
Antognathus	Sepkoski, 2002	Chordata	Conodonta		CONODONTOPHORIDA		D	Fame-u	D	Fame-u	Nektic	Planktonekton	Compressed, Muscular, Finned, Small, Wide-ranging Pelagic Facies	1	Klapper & Barrick, 1978; Briggs et al., 1983; Signor & Vermeij, 1994	Absent	N/A
Apatella	Sepkoski, 2002	Chordata	Conodonta		CONODONTOPHORIDA		D	Fame-u	D	Fame-u	Nektic	Planktonekton	Compressed, Muscular, Finned, Small, Wide-ranging Pelagic Facies	1	Klapper & Barrick, 1978; Briggs et al., 1983; Signor & Vermeij, 1994	Absent	N/A
Apatognathus	Sepkoski, 2002	Chordata	Conodonta		CONODONTOPHORIDA		D	Fame-m	C	Vise-u	Nektic	Planktonekton	Compressed, Muscular, Finned, Small, Wide-ranging Pelagic Facies	1	Klapper & Barrick, 1978; Briggs et al., 1983; Signor & Vermeij, 1994	Absent	N/A
Aphelognathus	Sepkoski, 2002	Chordata	Conodonta		CONODONTOPHORIDA		O	Cara-m	O	Ashg-u	Nektic	Planktonekton	Compressed, Muscular, Finned, Small, Wide-ranging Pelagic Facies	1	Klapper & Barrick, 1978; Briggs et al., 1983; Signor & Vermeij, 1994	Absent	N/A
Appalachignathus	Sepkoski, 2002	Chordata	Conodonta		CONODONTOPHORIDA		O	Llde-u	O	Cara-l	Nektic	Planktonekton	Compressed, Muscular, Finned, Small, Wide-ranging Pelagic Facies	1	Klapper & Barrick, 1978; Briggs et al., 1983; Signor & Vermeij, 1994	Absent	N/A
Apsidognathus	Sepkoski, 2002	Chordata	Conodonta		CONODONTOPHORIDA		S	Ldov-u	S	Wenl-l	Nektic	Planktonekton	Compressed, Muscular, Finned, Small, Wide-ranging Pelagic Facies	1	Klapper & Barrick, 1978; Briggs et al., 1983; Signor & Vermeij, 1994	Absent	N/A
Archaeognathus	Sepkoski, 2002	Chordata	Conodonta		CONODONTOPHORIDA		O	Cara-l	O	Cara-l	Nektic	Planktonekton	Compressed, Muscular, Finned, Small, Wide-ranging Pelagic Facies	1	Klapper & Barrick, 1978; Briggs et al., 1983; Signor & Vermeij, 1994	Absent	N/A
Aspeluindia	Sepkoski, 2002	Chordata	Conodonta		CONODONTOPHORIDA		S	Ldov-u	S	Wenl-l	Nektic	Planktonekton	Compressed, Muscular, Finned, Small, Wide-ranging Pelagic Facies	1	Klapper & Barrick, 1978; Briggs et al., 1983; Signor & Vermeij, 1994	Absent	N/A
Astropentagnathus	Sepkoski, 2002	Chordata	Conodonta		CONODONTOPHORIDA		S	Ldov-u	S	Ldov-u	Nektic	Planktonekton	Compressed, Muscular, Finned, Small, Wide-ranging Pelagic Facies	1	Klapper & Barrick, 1978; Briggs et al., 1983; Signor & Vermeij, 1994	Absent	N/A
Aulacognathus	Sepkoski, 2002	Chordata	Conodonta		CONODONTOPHORIDA		S	Ldov-u	S	Ldov-u	Nektic	Planktonekton	Compressed, Muscular, Finned, Small, Wide-ranging Pelagic Facies	1	Klapper & Barrick, 1978; Briggs et al., 1983; Signor & Vermeij, 1994	Absent	N/A
Bactrognathus	Sepkoski, 2002	Chordata	Conodonta		CONODONTOPHORIDA		C	Tour-u	C	Tour-u	Nektic	Planktonekton	Compressed, Muscular, Finned, Small, Wide-ranging Pelagic Facies	1	Klapper & Barrick, 1978; Briggs et al., 1983; Signor & Vermeij, 1994	Absent	N/A
Baltoniodus	Sepkoski, 2002	Chordata	Conodonta		CONODONTOPHORIDA		O	Aren-l	O	Ashg-l	Nektic	Planktonekton	Compressed, Muscular, Finned, Small, Wide-ranging Pelagic Facies	1	Klapper & Barrick, 1978; Briggs et al., 1983; Signor & Vermeij, 1994	Absent	N/A
Belodella	Sepkoski, 2002	Chordata	Conodonta		CONODONTOPHORIDA		S	Ldov	D	Fras-m	Nektic	Planktonekton	Compressed, Muscular, Finned, Small, Wide-ranging Pelagic Facies	1	Klapper & Barrick, 1978; Briggs et al., 1983; Signor & Vermeij, 1994	Absent	N/A
Belodina	Sepkoski, 2002	Chordata	Conodonta		CONODONTOPHORIDA		O	Llvi-l	O	Ashg-u	Nektic	Planktonekton	Compressed, Muscular, Finned, Small, Wide-ranging Pelagic Facies	1	Klapper & Barrick, 1978; Briggs et al., 1983; Signor & Vermeij, 1994	Absent	N/A
Bergstroemognathus	Sepkoski, 2002	Chordata	Conodonta		CONODONTOPHORIDA		O	Aren-l	O	Aren-l	Nektic	Planktonekton	Compressed, Muscular, Finned, Small, Wide-ranging Pelagic Facies	1	Klapper & Barrick, 1978; Briggs et al., 1983; Signor & Vermeij, 1994	Absent	N/A
Besselodus	Sepkoski, 2002	Chordata	Conodonta		CONODONTOPHORIDA		O	Llvi-u	O	Ashg-m	Nektic	Planktonekton	Compressed, Muscular, Finned, Small, Wide-ranging Pelagic Facies	1	Klapper & Barrick, 1978; Briggs et al., 1983; Signor & Vermeij, 1994	Absent	N/A
Bispathodus	Sepkoski, 2002	Chordata	Conodonta		CONODONTOPHORIDA		D	Fame-m	C	Vise-u	Nektic	Planktonekton	Compressed, Muscular, Finned, Small, Wide-ranging Pelagic Facies	1	Klapper & Barrick, 1978; Briggs et al., 1983; Signor & Vermeij, 1994	Absent	N/A
Branmehlia	Sepkoski, 2002	Chordata	Conodonta		CONODONTOPHORIDA		D	Fame-u	C	Tour-l	Nektic	Planktonekton	Compressed, Muscular, Finned, Small, Wide-ranging Pelagic Facies	1	Klapper & Barrick, 1978; Briggs et al., 1983; Signor & Vermeij, 1994	Absent	N/A
Bryantodina	Sepkoski, 2002	Chordata	Conodonta		CONODONTOPHORIDA		O	Llde-l	O	Cara-u	Nektic	Planktonekton	Compressed, Muscular, Finned, Small, Wide-ranging Pelagic Facies	1	Klapper & Barrick, 1978; Briggs et al., 1983; Signor & Vermeij, 1994	Absent	N/A
Bryantodus	Sepkoski, 2002	Chordata	Conodonta		CONODONTOPHORIDA		D	Fras-m	C	Mosc-u	Nektic	Planktonekton	Compressed, Muscular, Finned, Small, Wide-ranging Pelagic Facies	1	Klapper & Barrick, 1978; Briggs et al., 1983; Signor & Vermeij, 1994	Absent	N/A
Caenodontus	Sepkoski, 2002	Chordata	Conodonta		CONODONTOPHORIDA		P	Guad-l	P	Guad-u	Nektic	Planktonekton	Compressed, Muscular, Finned, Small, Wide-ranging Pelagic Facies	1	Klapper & Barrick, 1978; Briggs et al., 1983; Signor & Vermeij, 1994	Absent	N/A
Cahabagnathus	Sepkoski, 2002	Chordata	Conodonta		CONODONTOPHORIDA		O	Llde-l	O	Cara-l	Nektic	Planktonekton	Compressed, Muscular, Finned, Small, Wide-ranging Pelagic Facies	1	Klapper & Barrick, 1978; Briggs et al., 1983; Signor & Vermeij, 1994	Absent	N/A
Cambrooistodus	Sepkoski, 2002	Chordata	Conodonta		CONODONTOPHORIDA		Cm	Trep-l	Cm	Trep-u	Nektic	Planktonekton	Compressed, Muscular, Finned, Small, Wide-ranging Pelagic Facies	1	Klapper & Barrick, 1978; Briggs et al., 1983; Signor & Vermeij, 1994	Absent	N/A
Capricornognathus	Sepkoski, 2002	Chordata	Conodonta		CONODONTOPHORIDA		C	Vise-l	C	Vise-l	Nektic	Planktonekton	Compressed, Muscular, Finned, Small, Wide-ranging Pelagic Facies	1	Klapper & Barrick, 1978; Briggs et al., 1983; Signor & Vermeij, 1994	Absent	N/A
Carniodus	Sepkoski, 2002	Chordata	Conodonta		CONODONTOPHORIDA		S	Ldov-u	S	Wenl-l	Nektic	Planktonekton	Compressed, Muscular, Finned, Small, Wide-ranging Pelagic Facies	1	Klapper & Barrick, 1978; Briggs et al., 1983; Signor & Vermeij, 1994	Absent	N/A
Cavusgnathus	Sepkoski, 2002	Chordata	Conodonta		CONODONTOPHORIDA		C	Tour-l	C	Serp-l	Nektic	Planktonekton	Compressed, Muscular, Finned, Small, Wide-ranging Pelagic Facies	1	Klapper & Barrick, 1978; Briggs et al., 1983; Signor & Vermeij, 1994	Absent	N/A
Chirognathus	Sepkoski, 2002	Chordata	Conodonta		CONODONTOPHORIDA		O	Llde-l	O	Cara-u	Nektic	Planktonekton	Compressed, Muscular, Finned, Small, Wide-ranging Pelagic Facies	1	Klapper & Barrick, 1978; Briggs et al., 1983; Signor & Vermeij, 1994	Absent	N/A
Chosonodina	Sepkoski, 2002	Chordata	Conodonta		CONODONTOPHORIDA		O	Trem-u	O	Llvi	Nektic	Planktonekton	Compressed, Muscular, Finned, Small, Wide-ranging Pelagic Facies	1	Klapper & Barrick, 1978; Briggs et al., 1983; Signor & Vermeij, 1994	Absent	N/A
Clavohamulus	Sepkoski, 2002	Chordata	Conodonta		CONODONTOPHORIDA		O	Trem-l	O	Trem-u	Nektic	Planktonekton	Compressed, Muscular, Finned, Small, Wide-ranging Pelagic Facies	1	Klapper & Barrick, 1978; Briggs et al., 1983; Signor & Vermeij, 1994	Absent	N/A
Cloghergnathus	Sepkoski, 2002	Chordata	Conodonta		CONODONTOPHORIDA		C	Vise-l	C	Vise-l	Nektic	Planktonekton	Compressed, Muscular, Finned, Small, Wide-ranging Pelagic Facies	1	Klapper & Barrick, 1978; Briggs et al., 1983; Signor & Vermeij, 1994	Absent	N/A
Clydagnathus	Sepkoski, 2002	Chordata	Conodonta		CONODONTOPHORIDA		D	Fame-u	C	Tour-l	Nektic	Planktonekton	Compressed, Muscular, Finned, Small, Wide-ranging Pelagic Facies	1	Klapper & Barrick, 1978; Briggs et al., 1983; Signor & Vermeij, 1994	Absent	N/A
Coelocerodontus	Sepkoski, 2002	Chordata	Conodonta		CONODONTOPHORIDA		O	Llvi-u	O	Cara-u	Nektic	Planktonekton	Compressed, Muscular, Finned, Small, Wide-ranging Pelagic Facies	1	Klapper & Barrick, 1978; Briggs et al., 1983; Signor & Vermeij, 1994	Absent	N/A
Coleodus	Sepkoski, 2002	Chordata	Conodonta		CONODONTOPHORIDA		O	Llvi-l	O	Cara-l	Nektic	Planktonekton	Compressed, Muscular, Finned, Small, Wide-ranging Pelagic Facies	1	Klapper & Barrick, 1978; Briggs et al., 1983; Signor & Vermeij, 1994	Absent	N/A
Complexodus	Sepkoski, 2002	Chordata	Conodonta		CONODONTOPHORIDA		O	Llde-l	O	Cara-l	Nektic	Planktonekton	Compressed, Muscular, Finned, Small, Wide-ranging Pelagic Facies	1	Klapper & Barrick, 1978; Briggs et al., 1983; Signor & Vermeij, 1994	Absent	N/A
Cordylodus	Sepkoski, 2002	Chordata	Conodonta		CONODONTOPHORIDA		Cm	Trep-u	O	Trem-u	Nektic	Planktonekton	Compressed, Muscular, Finned, Small, Wide-ranging Pelagic Facies	1	Klapper & Barrick, 1978; Briggs et al., 1983; Signor & Vermeij, 1994	Absent	N/A
Cornuodus	Sepkoski, 2002	Chordata	Conodonta		CONODONTOPHORIDA		O	Trem	O	Ashg	Nektic	Planktonekton	Compressed, Muscular, Finned, Small, Wide-ranging Pelagic Facies	1	Klapper & Barrick, 1978; Briggs et al., 1983; Signor & Vermeij, 1994	Absent	N/A
Coryssognathus	Sepkoski, 2002	Chordata	Conodonta		CONODONTOPHORIDA		S	Ludl	S	Ludl	Nektic	Planktonekton	Compressed, Muscular, Finned, Small, Wide-ranging Pelagic Facies	1	Klapper & Barrick, 1978; Briggs et al., 1983; Signor & Vermeij, 1994	Absent	N/A
Cristodus	Sepkoski, 2002	Chordata	Conodonta		CONODONTOPHORIDA		O	Aren-l	O	Aren-l	Nektic	Planktonekton	Compressed, Muscular, Finned, Small, Wide-ranging Pelagic Facies	1	Klapper & Barrick, 1978; Briggs et al., 1983; Signor & Vermeij, 1994	Absent	N/A
Cryptotaxis	Sepkoski, 2002	Chordata	Conodonta		CONODONTOPHORIDA		D	Fame-u	D	Fame-u	Nektic	Planktonekton	Compressed, Muscular, Finned, Small, Wide-ranging Pelagic Facies	1	Klapper & Barrick, 1978; Briggs et al., 1983; Signor & Vermeij, 1994	Absent	N/A
Culumbodina	Sepkoski, 2002	Chordata	Conodonta		CONODONTOPHORIDA		O	Llde-u	O	Ashg-l	Nektic	Planktonekton	Compressed, Muscular, Finned, Small, Wide-ranging Pelagic Facies	1	Klapper & Barrick, 1978; Briggs et al., 1983; Signor & Vermeij, 1994	Absent	N/A
Curtognathus	Sepkoski, 2002	Chordata	Conodonta		CONODONTOPHORIDA		O	Llvi-u	O	Cara-m	Nektic	Planktonekton	Compressed, Muscular, Finned, Small, Wide-ranging Pelagic Facies	1	Klapper & Barrick, 1978; Briggs et al., 1983; Signor & Vermeij, 1994	Absent	N/A
Dapsilodus	Sepkoski, 2002	Chordata	Conodonta		CONODONTOPHORIDA		O	Llde-u	D	Gedi	Nektic	Planktonekton	Compressed, Muscular, Finned, Small, Wide-ranging Pelagic Facies	1	Klapper & Barrick, 1978; Briggs et al., 1983; Signor & Vermeij, 1994	Absent	N/A
Declinognathodus	Sepkoski, 2002	Chordata	Conodonta		CONODONTOPHORIDA		C	Serp-u	C	Mosc-l	Nektic	Planktonekton	Compressed, Muscular, Finned, Small, Wide-ranging Pelagic Facies	1	Klapper & Barrick, 1978; Briggs et al., 1983; Signor & Vermeij, 1994	Absent	N/A
Decoriconus	Sepkoski, 2002	Chordata	Conodonta		CONODONTOPHORIDA		O	Cara-u	D	Gedi	Nektic	Planktonekton	Compressed, Muscular, Finned, Small, Wide-ranging Pelagic Facies	1	Klapper & Barrick, 1978; Briggs et al., 1983; Signor & Vermeij, 1994	Absent	N/A
Dentacodina	Sepkoski, 2002	Chordata	Conodonta		CONODONTOPHORIDA		S	Ldov-u	D	Gedi-l	Nektic	Planktonekton	Compressed, Muscular, Finned, Small, Wide-ranging Pelagic Facies	1	Klapper & Barrick, 1978; Briggs et al., 1983; Signor & Vermeij, 1994	Absent	N/A
Dichodella	Sepkoski, 2002	Chordata	Conodonta		CONODONTOPHORIDA		O	Ashg	O	Ashg	Nektic	Planktonekton	Compressed, Muscular, Finned, Small, Wide-ranging Pelagic Facies	1	Klapper & Barrick, 1978; Briggs et al., 1983; Signor & Vermeij, 1994	Absent	N/A
Diplododella	Sepkoski, 2002	Chordata	Conodonta		CONODONTOPHORIDA		D	Fame-u	D	Fame-u	Nektic	Planktonekton	Compressed, Muscular, Finned, Small, Wide-ranging Pelagic Facies	1	Klapper & Barrick, 1978; Briggs et al., 1983; Signor & Vermeij, 1994	Absent	N/A
Diplognathodus	Sepkoski, 2002	Chordata	Conodonta		CONODONTOPHORIDA		C	Vise	P	Dora	Nektic	Planktonekton	Compressed, Muscular, Finned, Small, Wide-ranging Pelagic Facies	1	Klapper & Barrick, 1978; Briggs et al., 1983; Signor & Vermeij, 1994	Absent	N/A
Dischidognathus	Sepkoski, 2002	Chordata	Conodonta		CONODONTOPHORIDA		O	Aren-u	O	Llvi-u	Nektic	Planktonekton	Compressed, Muscular, Finned, Small, Wide-ranging Pelagic Facies	1	Klapper & Barrick, 1978; Briggs et al., 1983; Signor & Vermeij, 1994	Absent	N/A
Distomodus	Sepkoski, 2002	Chordata	Conodonta		CONODONTOPHORIDA		S	Ldov-l	S	Wenl-l	Nektic	Planktonekton	Compressed, Muscular, Finned, Small, Wide-ranging Pelagic Facies	1	Klapper & Barrick, 1978; Briggs et al., 1983; Signor & Vermeij, 1994	Absent	N/A
Doliognathus	Sepkoski, 2002	Chordata	Conodonta		CONODONTOPHORIDA		C	Tour-u	C	Vise-l	Nektic	Planktonekton	Compressed, Muscular, Finned, Small, Wide-ranging Pelagic Facies	1	Klapper & Barrick, 1978; Briggs et al., 1983; Signor & Vermeij, 1994	Absent	N/A
Dollymae	Sepkoski, 2002	Chordata	Conodonta		CONODONTOPHORIDA		C	Tour-l	C	Tour-u	Nektic	Planktonekton	Compressed, Muscular, Finned, Small, Wide-ranging Pelagic Facies	1	Klapper & Barrick, 1978; Briggs et al., 1983; Signor & Vermeij, 1994	Absent	N/A
Drepanodus	Sepkoski, 2002	Chordata	Conodonta		CONODONTOPHORIDA		O	Trem-u	O	Cara-m	Nektic	Planktonekton	Compressed, Muscular, Finned, Small, Wide-ranging Pelagic Facies	1	Klapper & Barrick, 1978; Briggs et al., 1983; Signor & Vermeij, 1994	Absent	N/A
Drepanoistodus	Sepkoski, 2002	Chordata	Conodonta		CONODONTOPHORIDA		O	Trem-u	O	Ashg-u	Nektic	Planktonekton	Compressed, Muscular, Finned, Small, Wide-ranging Pelagic Facies	1	Klapper & Barrick, 1978; Briggs et al., 1983; Signor & Vermeij, 1994	Absent	N/A
Dvorakia	Sepkoski, 2002	Chordata	Conodonta		CONODONTOPHORIDA		S	Prid	D	Eife-u	Nektic	Planktonekton	Compressed, Muscular, Finned, Small, Wide-ranging Pelagic Facies	1	Klapper & Barrick, 1978; Briggs et al., 1983; Signor & Vermeij, 1994	Absent	N/A
Ellisonia	Sepkoski, 2002	Chordata	Conodonta		CONODONTOPHORIDA		C	Bash-u	Tr	Nori-u	Nektic	Planktonekton	Compressed, Muscular, Finned, Small, Wide-ranging Pelagic Facies	1	Klapper & Barrick, 1978; Briggs et al., 1983; Signor & Vermeij, 1994	Absent	N/A
Elsonella	Sepkoski, 2002	Chordata	Conodonta		CONODONTOPHORIDA		D	Fras	D	Fras	Nektic	Planktonekton	Compressed, Muscular, Finned, Small, Wide-ranging Pelagic Facies	1	Klapper & Barrick, 1978; Briggs et al., 1983; Signor & Vermeij, 1994	Absent	N/A
Embaysgnathus	Sepkoski, 2002	Chordata	Conodonta		CONODONTOPHORIDA		C	Vise-l	C	Vise-l	Nektic	Planktonekton	Compressed, Muscular, Finned, Small, Wide-ranging Pelagic Facies	1	Klapper & Barrick, 1978; Briggs et al., 1983; Signor & Vermeij, 1994	Absent	N/A
Eocarniodus	Sepkoski, 2002	Chordata	Conodonta		CONODONTOPHORIDA		O	Ashg-l	O	Ashg-m	Nektic	Planktonekton	Compressed, Muscular, Finned, Small, Wide-ranging Pelagic Facies	1	Klapper & Barrick, 1978; Briggs et al., 1983; Signor & Vermeij, 1994	Absent	N/A
Eoconodontus	Sepkoski, 2002	Chordata	Conodonta		CONODONTOPHORIDA		Cm	Trep-l	O	Trem-l	Nektic	Planktonekton	Compressed, Muscular, Finned, Small, Wide-ranging Pelagic Facies	1	Klapper & Barrick, 1978; Briggs et al., 1983; Signor & Vermeij, 1994	Absent	N/A
Eognathodus	Sepkoski, 2002	Chordata	Conodonta		CONODONTOPHORIDA		D	Sieg-l	D	Give-l	Nektic	Planktonekton	Compressed, Muscular, Finned, Small, Wide-ranging Pelagic Facies	1	Klapper & Barrick, 1978; Briggs et al., 1983; Signor & Vermeij, 1994	Absent	N/A
Eoplacognathus	Sepkoski, 2002	Chordata	Conodonta		CONODONTOPHORIDA		O	Aren-u	O	Cara-l	Nektic	Planktonekton	Compressed, Muscular, Finned, Small, Wide-ranging Pelagic Facies	1	Klapper & Barrick, 1978; Briggs et al., 1983; Signor & Vermeij, 1994	Absent	N/A
Eotaphrus	Sepkoski, 2002	Chordata	Conodonta		CONODONTOPHORIDA		C	Tour-l	C	Vise-l	Nektic	Planktonekton	Compressed, Muscular, Finned, Small, Wide-ranging Pelagic Facies	1	Klapper & Barrick, 1978; Briggs et al., 1983; Signor & Vermeij, 1994	Absent	N/A
Erika	Sepkoski, 2002	Chordata	Conodonta		CONODONTOPHORIDA		D	Gedi	D	Gedi	Nektic	Planktonekton	Compressed, Muscular, Finned, Small, Wide-ranging Pelagic Facies	1	Klapper & Barrick, 1978; Briggs et al., 1983; Signor & Vermeij, 1994	Absent	N/A
Erismodus	Sepkoski, 2002	Chordata	Conodonta		CONODONTOPHORIDA		O	Llde-l	O	Cara-m	Nektic	Planktonekton	Compressed, Muscular, Finned, Small, Wide-ranging Pelagic Facies	1	Klapper & Barrick, 1978; Briggs et al., 1983; Signor & Vermeij, 1994	Absent	N/A
Erraticodon	Sepkoski, 2002	Chordata	Conodonta		CONODONTOPHORIDA		O	Aren-u	O	Llde-l	Nektic	Planktonekton	Compressed, Muscular, Finned, Small, Wide-ranging Pelagic Facies	1	Klapper & Barrick, 1978; Briggs et al., 1983; Signor & Vermeij, 1994	Absent	N/A
Euprioniodina	Sepkoski, 2002	Chordata	Conodonta		CONODONTOPHORIDA		D	Fras-m	D	Fras-m	Nektic	Planktonekton	Compressed, Muscular, Finned, Small, Wide-ranging Pelagic Facies	1	Klapper & Barrick, 1978; Briggs et al., 1983; Signor & Vermeij, 1994	Absent	N/A
Evencodus	Sepkoski, 2002	Chordata	Conodonta		CONODONTOPHORIDA		O	Llde-l	O	Llde-u	Nektic	Planktonekton	Compressed, Muscular, Finned, Small, Wide-ranging Pelagic Facies	1	Klapper & Barrick, 1978; Briggs et al., 1983; Signor & Vermeij, 1994	Absent	N/A
Fahraeusodus	Sepkoski, 2002	Chordata	Conodonta		CONODONTOPHORIDA		O	Aren	O	Aren	Nektic	Planktonekton	Compressed, Muscular, Finned, Small, Wide-ranging Pelagic Facies	1	Klapper & Barrick, 1978; Briggs et al., 1983; Signor & Vermeij, 1994	Absent	N/A
Fryxellodontus	Sepkoski, 2002	Chordata	Conodonta		CONODONTOPHORIDA		Cm	Trep	O	Aren-l	Nektic	Planktonekton	Compressed, Muscular, Finned, Small, Wide-ranging Pelagic Facies	1	Klapper & Barrick, 1978; Briggs et al., 1983; Signor & Vermeij, 1994	Absent	N/A
Fungulodus	Sepkoski, 2002	Chordata	Conodonta		CONODONTOPHORIDA		D	Fame-u	D	Fame-u	Nektic	Planktonekton	Compressed, Muscular, Finned, Small, Wide-ranging Pelagic Facies	1	Klapper & Barrick, 1978; Briggs et al., 1983; Signor & Vermeij, 1994	Absent	N/A
Gamachignathus	Sepkoski, 2002	Chordata	Conodonta		CONODONTOPHORIDA		O	Ashg-m	O	Ashg-u	Nektic	Planktonekton	Compressed, Muscular, Finned, Small, Wide-ranging Pelagic Facies	1	Klapper & Barrick, 1978; Briggs et al., 1983; Signor & Vermeij, 1994	Absent	N/A
Geniculatus	Sepkoski, 2002	Chordata	Conodonta		CONODONTOPHORIDA		C	Vise-l	C	Serp-l	Nektic	Planktonekton	Compressed, Muscular, Finned, Small, Wide-ranging Pelagic Facies	1	Klapper & Barrick, 1978; Briggs et al., 1983; Signor & Vermeij, 1994	Absent	N/A
Glyptoconus	Sepkoski, 2002	Chordata	Conodonta		CONODONTOPHORIDA		O	Trem-u	O	Llvi-u	Nektic	Planktonekton	Compressed, Muscular, Finned, Small, Wide-ranging Pelagic Facies	1	Klapper & Barrick, 1978; Briggs et al., 1983; Signor & Vermeij, 1994	Absent	N/A
Gnathodus	Sepkoski, 2002	Chordata	Conodonta		CONODONTOPHORIDA		C	Tour-l	C	Serp-l	Nektic	Planktonekton	Compressed, Muscular, Finned, Small, Wide-ranging Pelagic Facies	1	Klapper & Barrick, 1978; Briggs et al., 1983; Signor & Vermeij, 1994	Absent	N/A
Gondolella	Sepkoski, 2002	Chordata	Conodonta		CONODONTOPHORIDA		C	Mosc-u	C	Step-u	Nektic	Planktonekton	Compressed, Muscular, Finned, Small, Wide-ranging Pelagic Facies	1	Klapper & Barrick, 1978; Briggs et al., 1983; Signor & Vermeij, 1994	Absent	N/A
Granatodontus	Sepkoski, 2002	Chordata	Conodonta		CONODONTOPHORIDA		Cm	Trep	Cm	Trep	Nektic	Planktonekton	Compressed, Muscular, Finned, Small, Wide-ranging Pelagic Facies	1	Klapper & Barrick, 1978; Briggs et al., 1983; Signor & Vermeij, 1994	Absent	N/A
Hamarodus	Sepkoski, 2002	Chordata	Conodonta		CONODONTOPHORIDA		O	Cara-u	O	Ashg-u	Nektic	Planktonekton	Compressed, Muscular, Finned, Small, Wide-ranging Pelagic Facies	1	Klapper & Barrick, 1978; Briggs et al., 1983; Signor & Vermeij, 1994	Absent	N/A
Hemilistrona	Sepkoski, 2002	Chordata	Conodonta		CONODONTOPHORIDA		D	Fame-u	D	Fame-u	Nektic	Planktonekton	Compressed, Muscular, Finned, Small, Wide-ranging Pelagic Facies	1	Klapper & Barrick, 1978; Briggs et al., 1983; Signor & Vermeij, 1994	Absent	N/A
Hibbardella	Sepkoski, 2002	Chordata	Conodonta		CONODONTOPHORIDA		D	Eife-l	D	Fame-u	Nektic	Planktonekton	Compressed, Muscular, Finned, Small, Wide-ranging Pelagic Facies	1	Klapper & Barrick, 1978; Briggs et al., 1983; Signor & Vermeij, 1994	Absent	N/A
Hindeodelloides	Sepkoski, 2002	Chordata	Conodonta		CONODONTOPHORIDA		C	Tour-l	C	Tour-l	Nektic	Planktonekton	Compressed, Muscular, Finned, Small, Wide-ranging Pelagic Facies	1	Klapper & Barrick, 1978; Briggs et al., 1983; Signor & Vermeij, 1994	Absent	N/A
Hindeodina	Sepkoski, 2002	Chordata	Conodonta		CONODONTOPHORIDA		D	Fame-m	C	Serp-l	Nektic	Planktonekton	Compressed, Muscular, Finned, Small, Wide-ranging Pelagic Facies	1	Klapper & Barrick, 1978; Briggs et al., 1983; Signor & Vermeij, 1994	Absent	N/A
Hindeodus	Sepkoski, 2002	Chordata	Conodonta		CONODONTOPHORIDA		C	Tour-l	Tr	Indu-u	Nektic	Planktonekton	Compressed, Muscular, Finned, Small, Wide-ranging Pelagic Facies	1	Klapper & Barrick, 1978; Briggs et al., 1983; Signor & Vermeij, 1994	Absent	N/A
Hirsutodontus	Sepkoski, 2002	Chordata	Conodonta		CONODONTOPHORIDA		Cm	Trep-u	O	Trem-l	Nektic	Planktonekton	Compressed, Muscular, Finned, Small, Wide-ranging Pelagic Facies	1	Klapper & Barrick, 1978; Briggs et al., 1983; Signor & Vermeij, 1994	Absent	N/A
Histiodella	Sepkoski, 2002	Chordata	Conodonta		CONODONTOPHORIDA		O	Aren-u	O	Aren-u	Nektic	Planktonekton	Compressed, Muscular, Finned, Small, Wide-ranging Pelagic Facies	1	Klapper & Barrick, 1978; Briggs et al., 1983; Signor & Vermeij, 1994	Absent	N/A
Huddlella	Sepkoski, 2002	Chordata	Conodonta		CONODONTOPHORIDA		S	Wenl-u	S	Wenl-u	Nektic	Planktonekton	Compressed, Muscular, Finned, Small, Wide-ranging Pelagic Facies	1	Klapper & Barrick, 1978; Briggs et al., 1983; Signor & Vermeij, 1994	Absent	N/A
Iapetognathus	Sepkoski, 2002	Chordata	Conodonta		CONODONTOPHORIDA		O	Trem-u	O	Trem-u	Nektic	Planktonekton	Compressed, Muscular, Finned, Small, Wide-ranging Pelagic Facies	1	Klapper & Barrick, 1978; Briggs et al., 1983; Signor & Vermeij, 1994	Absent	N/A
Icriodella	Sepkoski, 2002	Chordata	Conodonta		CONODONTOPHORIDA		O	Llvi	S	Wenl-l	Nektic	Planktonekton	Compressed, Muscular, Finned, Small, Wide-ranging Pelagic Facies	1	Klapper & Barrick, 1978; Briggs et al., 1983; Signor & Vermeij, 1994	Absent	N/A
Icriodus	Sepkoski, 2002	Chordata	Conodonta		CONODONTOPHORIDA		S	Prid	D	Fame-u	Nektic	Planktonekton	Compressed, Muscular, Finned, Small, Wide-ranging Pelagic Facies	1	Klapper & Barrick, 1978; Briggs et al., 1983; Signor & Vermeij, 1994	Absent	N/A
Idiognathodus	Sepkoski, 2002	Chordata	Conodonta		CONODONTOPHORIDA		C	Bash-l	C	Step-u	Nektic	Planktonekton	Compressed, Muscular, Finned, Small, Wide-ranging Pelagic Facies	1	Klapper & Barrick, 1978; Briggs et al., 1983; Signor & Vermeij, 1994	Absent	N/A
Idiognathoides	Sepkoski, 2002	Chordata	Conodonta		CONODONTOPHORIDA		C	Serp-u	C	Mosc-u	Nektic	Planktonekton	Compressed, Muscular, Finned, Small, Wide-ranging Pelagic Facies	1	Klapper & Barrick, 1978; Briggs et al., 1983; Signor & Vermeij, 1994	Absent	N/A
Idioprioniodus	Sepkoski, 2002	Chordata	Conodonta		CONODONTOPHORIDA		C	Vise-u	C	Step-u	Nektic	Planktonekton	Compressed, Muscular, Finned, Small, Wide-ranging Pelagic Facies	1	Klapper & Barrick, 1978; Briggs et al., 1983; Signor & Vermeij, 1994	Absent	N/A
Iranognathus	Sepkoski, 2002	Chordata	Conodonta		CONODONTOPHORIDA		P	Dora	P	Dora	Nektic	Planktonekton	Compressed, Muscular, Finned, Small, Wide-ranging Pelagic Facies	1	Klapper & Barrick, 1978; Briggs et al., 1983; Signor & Vermeij, 1994	Absent	N/A
Istorinus	Sepkoski, 2002	Chordata	Conodonta		CONODONTOPHORIDA		O	Ashg	O	Ashg	Nektic	Planktonekton	Compressed, Muscular, Finned, Small, Wide-ranging Pelagic Facies	1	Klapper & Barrick, 1978; Briggs et al., 1983; Signor & Vermeij, 1994	Absent	N/A
Johnognathus	Sepkoski, 2002	Chordata	Conodonta		CONODONTOPHORIDA		S	Ldov-u	S	Wenl-l	Nektic	Planktonekton	Compressed, Muscular, Finned, Small, Wide-ranging Pelagic Facies	1	Klapper & Barrick, 1978; Briggs et al., 1983; Signor & Vermeij, 1994	Absent	N/A
Juanognathus	Sepkoski, 2002	Chordata	Conodonta		CONODONTOPHORIDA		O	Trem-u	O	Llvi-l	Nektic	Planktonekton	Compressed, Muscular, Finned, Small, Wide-ranging Pelagic Facies	1	Klapper & Barrick, 1978; Briggs et al., 1983; Signor & Vermeij, 1994	Absent	N/A
Jumudontus	Sepkoski, 2002	Chordata	Conodonta		CONODONTOPHORIDA		O	Aren-l	O	Aren-u	Nektic	Planktonekton	Compressed, Muscular, Finned, Small, Wide-ranging Pelagic Facies	1	Klapper & Barrick, 1978; Briggs et al., 1983; Signor & Vermeij, 1994	Absent	N/A
Kimognathus	Sepkoski, 2002	Chordata	Conodonta		CONODONTOPHORIDA		D	Sieg-l	D	Sieg-l	Nektic	Planktonekton	Compressed, Muscular, Finned, Small, Wide-ranging Pelagic Facies	1	Klapper & Barrick, 1978; Briggs et al., 1983; Signor & Vermeij, 1994	Absent	N/A
Kladognathus	Sepkoski, 2002	Chordata	Conodonta		CONODONTOPHORIDA		C	Tour-u	C	Serp-l	Nektic	Planktonekton	Compressed, Muscular, Finned, Small, Wide-ranging Pelagic Facies	1	Klapper & Barrick, 1978; Briggs et al., 1983; Signor & Vermeij, 1994	Absent	N/A
Klapperina	Sepkoski, 2002	Chordata	Conodonta		CONODONTOPHORIDA		D	Give-u	D	Give-u	Nektic	Planktonekton	Compressed, Muscular, Finned, Small, Wide-ranging Pelagic Facies	1	Klapper & Barrick, 1978; Briggs et al., 1983; Signor & Vermeij, 1994	Absent	N/A
Kockelella	Sepkoski, 2002	Chordata	Conodonta		CONODONTOPHORIDA		S	Ldov-l	S	Ludl-u	Nektic	Planktonekton	Compressed, Muscular, Finned, Small, Wide-ranging Pelagic Facies	1	Klapper & Barrick, 1978; Briggs et al., 1983; Signor & Vermeij, 1994	Absent	N/A
Latericriodus	Sepkoski, 2002	Chordata	Conodonta		CONODONTOPHORIDA		S	Prid	D	Sieg-l	Nektic	Planktonekton	Compressed, Muscular, Finned, Small, Wide-ranging Pelagic Facies	1	Klapper & Barrick, 1978; Briggs et al., 1983; Signor & Vermeij, 1994	Absent	N/A
Laterignathus	Sepkoski, 2002	Chordata	Conodonta		CONODONTOPHORIDA		S	Prid	D	Give-u	Nektic	Planktonekton	Compressed, Muscular, Finned, Small, Wide-ranging Pelagic Facies	1	Klapper & Barrick, 1978; Briggs et al., 1983; Signor & Vermeij, 1994	Absent	N/A
Laurentoscandodus	Sepkoski, 2002	Chordata	Conodonta		CONODONTOPHORIDA		O	Trem-u	O	Trem-u	Nektic	Planktonekton	Compressed, Muscular, Finned, Small, Wide-ranging Pelagic Facies	1	Klapper & Barrick, 1978; Briggs et al., 1983; Signor & Vermeij, 1994	Absent	N/A
Lenodus	Sepkoski, 2002	Chordata	Conodonta		CONODONTOPHORIDA		O	Aren-l	O	Aren-u	Nektic	Planktonekton	Compressed, Muscular, Finned, Small, Wide-ranging Pelagic Facies	1	Klapper & Barrick, 1978; Briggs et al., 1983; Signor & Vermeij, 1994	Absent	N/A
Leptochirognathus	Sepkoski, 2002	Chordata	Conodonta		CONODONTOPHORIDA		O	Aren-u	O	Llde	Nektic	Planktonekton	Compressed, Muscular, Finned, Small, Wide-ranging Pelagic Facies	1	Klapper & Barrick, 1978; Briggs et al., 1983; Signor & Vermeij, 1994	Absent	N/A
Leutorhinion	Sepkoski, 2002	Chordata	Conodonta		CONODONTOPHORIDA		O	Trem-u	O	Trem-u	Nektic	Planktonekton	Compressed, Muscular, Finned, Small, Wide-ranging Pelagic Facies	1	Klapper & Barrick, 1978; Briggs et al., 1983; Signor & Vermeij, 1994	Absent	N/A
Ligonodina	Sepkoski, 2002	Chordata	Conodonta		CONODONTOPHORIDA		D	Fras-m	D	Fras-u	Nektic	Planktonekton	Compressed, Muscular, Finned, Small, Wide-ranging Pelagic Facies	1	Klapper & Barrick, 1978; Briggs et al., 1983; Signor & Vermeij, 1994	Absent	N/A
Lochriea	Sepkoski, 2002	Chordata	Conodonta		CONODONTOPHORIDA		C	Vise-l	C	Serp-u	Nektic	Planktonekton	Compressed, Muscular, Finned, Small, Wide-ranging Pelagic Facies	1	Klapper & Barrick, 1978; Briggs et al., 1983; Signor & Vermeij, 1994	Absent	N/A
Lonchodina	Sepkoski, 2002	Chordata	Conodonta		CONODONTOPHORIDA		D	Fras-m	C	Serp-l	Nektic	Planktonekton	Compressed, Muscular, Finned, Small, Wide-ranging Pelagic Facies	1	Klapper & Barrick, 1978; Briggs et al., 1983; Signor & Vermeij, 1994	Absent	N/A
Loxodus	Sepkoski, 2002	Chordata	Conodonta		CONODONTOPHORIDA		O	Trem-l	O	Trem-u	Nektic	Planktonekton	Compressed, Muscular, Finned, Small, Wide-ranging Pelagic Facies	1	Klapper & Barrick, 1978; Briggs et al., 1983; Signor & Vermeij, 1994	Absent	N/A
Macerodus	Sepkoski, 2002	Chordata	Conodonta		CONODONTOPHORIDA		O	Trem-u	O	Trem-u	Nektic	Planktonekton	Compressed, Muscular, Finned, Small, Wide-ranging Pelagic Facies	1	Klapper & Barrick, 1978; Briggs et al., 1983; Signor & Vermeij, 1994	Absent	N/A
Mehlina	Sepkoski, 2002	Chordata	Conodonta		CONODONTOPHORIDA		D	Fras-l	C	Tour-l	Nektic	Planktonekton	Compressed, Muscular, Finned, Small, Wide-ranging Pelagic Facies	1	Klapper & Barrick, 1978; Briggs et al., 1983; Signor & Vermeij, 1994	Absent	N/A
Merrillina	Sepkoski, 2002	Chordata	Conodonta		CONODONTOPHORIDA		P	Guad-u	P	Djhu	Nektic	Planktonekton	Compressed, Muscular, Finned, Small, Wide-ranging Pelagic Facies	1	Klapper & Barrick, 1978; Briggs et al., 1983; Signor & Vermeij, 1994	Absent	N/A
Mesotaxis	Sepkoski, 2002	Chordata	Conodonta		CONODONTOPHORIDA		D	Give-u	D	Fras-u	Nektic	Planktonekton	Compressed, Muscular, Finned, Small, Wide-ranging Pelagic Facies	1	Klapper & Barrick, 1978; Briggs et al., 1983; Signor & Vermeij, 1994	Absent	N/A
Mestognathus	Sepkoski, 2002	Chordata	Conodonta		CONODONTOPHORIDA		C	Tour-l	C	Serp-l	Nektic	Planktonekton	Compressed, Muscular, Finned, Small, Wide-ranging Pelagic Facies	1	Klapper & Barrick, 1978; Briggs et al., 1983; Signor & Vermeij, 1994	Absent	N/A
Metaprioniodus	Sepkoski, 2002	Chordata	Conodonta		CONODONTOPHORIDA		D	Fame	C	Tour-l	Nektic	Planktonekton	Compressed, Muscular, Finned, Small, Wide-ranging Pelagic Facies	1	Klapper & Barrick, 1978; Briggs et al., 1983; Signor & Vermeij, 1994	Absent	N/A
Microzarkodina	Sepkoski, 2002	Chordata	Conodonta		CONODONTOPHORIDA		O	Aren-l	O	Llvi-l	Nektic	Planktonekton	Compressed, Muscular, Finned, Small, Wide-ranging Pelagic Facies	1	Klapper & Barrick, 1978; Briggs et al., 1983; Signor & Vermeij, 1994	Absent	N/A
Mitrellotaxis	Sepkoski, 2002	Chordata	Conodonta		CONODONTOPHORIDA		D	Fame-u	D	Fame-u	Nektic	Planktonekton	Compressed, Muscular, Finned, Small, Wide-ranging Pelagic Facies	1	Klapper & Barrick, 1978; Briggs et al., 1983; Signor & Vermeij, 1994	Absent	N/A
Mixoconus	Sepkoski, 2002	Chordata	Conodonta		CONODONTOPHORIDA		O	Cara-l	O	Cara-l	Nektic	Planktonekton	Compressed, Muscular, Finned, Small, Wide-ranging Pelagic Facies	1	Klapper & Barrick, 1978; Briggs et al., 1983; Signor & Vermeij, 1994	Absent	N/A
Monocostodus	Sepkoski, 2002	Chordata	Conodonta		CONODONTOPHORIDA		O	Trem-l	O	Trem-u	Nektic	Planktonekton	Compressed, Muscular, Finned, Small, Wide-ranging Pelagic Facies	1	Klapper & Barrick, 1978; Briggs et al., 1983; Signor & Vermeij, 1994	Absent	N/A
Multioistodus	Sepkoski, 2002	Chordata	Conodonta		CONODONTOPHORIDA		O	Aren-u	O	Llde-u	Nektic	Planktonekton	Compressed, Muscular, Finned, Small, Wide-ranging Pelagic Facies	1	Klapper & Barrick, 1978; Briggs et al., 1983; Signor & Vermeij, 1994	Absent	N/A
Neocoleodus	Sepkoski, 2002	Chordata	Conodonta		CONODONTOPHORIDA		O	Cara-l	O	Cara-l	Nektic	Planktonekton	Compressed, Muscular, Finned, Small, Wide-ranging Pelagic Facies	1	Klapper & Barrick, 1978; Briggs et al., 1983; Signor & Vermeij, 1994	Absent	N/A
Neognathodus	Sepkoski, 2002	Chordata	Conodonta		CONODONTOPHORIDA		C	Bash-l	P	Asse	Nektic	Planktonekton	Compressed, Muscular, Finned, Small, Wide-ranging Pelagic Facies	1	Klapper & Barrick, 1978; Briggs et al., 1983; Signor & Vermeij, 1994	Absent	N/A
Neogondolella	Sepkoski, 2002	Chordata	Conodonta		CONODONTOPHORIDA		C	Bash-u	Tr	Carn-u	Nektic	Planktonekton	Compressed, Muscular, Finned, Small, Wide-ranging Pelagic Facies	1	Klapper & Barrick, 1978; Briggs et al., 1983; Signor & Vermeij, 1994	Absent	N/A
Neomultioistodus	Sepkoski, 2002	Chordata	Conodonta		CONODONTOPHORIDA		O	Aren-u	O	Llvi-l	Nektic	Planktonekton	Compressed, Muscular, Finned, Small, Wide-ranging Pelagic Facies	1	Klapper & Barrick, 1978; Briggs et al., 1983; Signor & Vermeij, 1994	Absent	N/A
Neopanderodus	Sepkoski, 2002	Chordata	Conodonta		CONODONTOPHORIDA		D	Emsi	D	Give-u	Nektic	Planktonekton	Compressed, Muscular, Finned, Small, Wide-ranging Pelagic Facies	1	Klapper & Barrick, 1978; Briggs et al., 1983; Signor & Vermeij, 1994	Absent	N/A
Neostreptognathodus	Sepkoski, 2002	Chordata	Conodonta		CONODONTOPHORIDA		P	Leon-l	P	Guad-l	Nektic	Planktonekton	Compressed, Muscular, Finned, Small, Wide-ranging Pelagic Facies	1	Klapper & Barrick, 1978; Briggs et al., 1983; Signor & Vermeij, 1994	Absent	N/A
Nericodus	Sepkoski, 2002	Chordata	Conodonta		CONODONTOPHORIDA		O	Trem-u	O	Trem-u	Nektic	Planktonekton	Compressed, Muscular, Finned, Small, Wide-ranging Pelagic Facies	1	Klapper & Barrick, 1978; Briggs et al., 1983; Signor & Vermeij, 1994	Absent	N/A
Nodognathus	Sepkoski, 2002	Chordata	Conodonta		CONODONTOPHORIDA		C	Tour-l	C	Tour-l	Nektic	Planktonekton	Compressed, Muscular, Finned, Small, Wide-ranging Pelagic Facies	1	Klapper & Barrick, 1978; Briggs et al., 1983; Signor & Vermeij, 1994	Absent	N/A
Nordiodus	Sepkoski, 2002	Chordata	Conodonta		CONODONTOPHORIDA		O	Ashg-m	O	Ashg-m	Nektic	Planktonekton	Compressed, Muscular, Finned, Small, Wide-ranging Pelagic Facies	1	Klapper & Barrick, 1978; Briggs et al., 1983; Signor & Vermeij, 1994	Absent	N/A
Oelandodus	Sepkoski, 2002	Chordata	Conodonta		CONODONTOPHORIDA		O	Aren-l	O	Aren-l	Nektic	Planktonekton	Compressed, Muscular, Finned, Small, Wide-ranging Pelagic Facies	1	Klapper & Barrick, 1978; Briggs et al., 1983; Signor & Vermeij, 1994	Absent	N/A
Oepikodus	Sepkoski, 2002	Chordata	Conodonta		CONODONTOPHORIDA		O	Aren-l	O	Aren-u	Nektic	Planktonekton	Compressed, Muscular, Finned, Small, Wide-ranging Pelagic Facies	1	Klapper & Barrick, 1978; Briggs et al., 1983; Signor & Vermeij, 1994	Absent	N/A
Oistodella	Sepkoski, 2002	Chordata	Conodonta		CONODONTOPHORIDA		O	Llvi-l	O	Llde-l	Nektic	Planktonekton	Compressed, Muscular, Finned, Small, Wide-ranging Pelagic Facies	1	Klapper & Barrick, 1978; Briggs et al., 1983; Signor & Vermeij, 1994	Absent	N/A
Oistodus	Sepkoski, 2002	Chordata	Conodonta		CONODONTOPHORIDA		O	Trem-l	O	Llvi-l	Nektic	Planktonekton	Compressed, Muscular, Finned, Small, Wide-ranging Pelagic Facies	1	Klapper & Barrick, 1978; Briggs et al., 1983; Signor & Vermeij, 1994	Absent	N/A
Oligodus	Sepkoski, 2002	Chordata	Conodonta		CONODONTOPHORIDA		C	Tour-l	C	Tour-l	Nektic	Planktonekton	Compressed, Muscular, Finned, Small, Wide-ranging Pelagic Facies	1	Klapper & Barrick, 1978; Briggs et al., 1983; Signor & Vermeij, 1994	Absent	N/A
Oneotodus	Sepkoski, 2002	Chordata	Conodonta		CONODONTOPHORIDA		Cm	mMid-u	O	Trem-u	Nektic	Planktonekton	Compressed, Muscular, Finned, Small, Wide-ranging Pelagic Facies	1	Klapper & Barrick, 1978; Briggs et al., 1983; Signor & Vermeij, 1994	Absent	N/A
Oulodus	Sepkoski, 2002	Chordata	Conodonta		CONODONTOPHORIDA		O	Cara-l	D	Emsi	Nektic	Planktonekton	Compressed, Muscular, Finned, Small, Wide-ranging Pelagic Facies	1	Klapper & Barrick, 1978; Briggs et al., 1983; Signor & Vermeij, 1994	Absent	N/A
Ozarkodina	Sepkoski, 2002	Chordata	Conodonta		CONODONTOPHORIDA		O	Cara-u	D	Fras-l	Nektic	Planktonekton	Compressed, Muscular, Finned, Small, Wide-ranging Pelagic Facies	1	Klapper & Barrick, 1978; Briggs et al., 1983; Signor & Vermeij, 1994	Absent	N/A
Palmatolepis	Sepkoski, 2002	Chordata	Conodonta		CONODONTOPHORIDA		D	Give-u	D	Fame-u	Nektic	Planktonekton	Compressed, Muscular, Finned, Small, Wide-ranging Pelagic Facies	1	Klapper & Barrick, 1978; Briggs et al., 1983; Signor & Vermeij, 1994	Absent	N/A
Paltodus	Sepkoski, 2002	Chordata	Conodonta		CONODONTOPHORIDA		O	Trem-u	O	Aren-l	Nektic	Planktonekton	Compressed, Muscular, Finned, Small, Wide-ranging Pelagic Facies	1	Klapper & Barrick, 1978; Briggs et al., 1983; Signor & Vermeij, 1994	Absent	N/A
Panderodus	Sepkoski, 2002	Chordata	Conodonta		CONODONTOPHORIDA		O	Aren-u	D	Give-u	Nektic	Planktonekton	Compressed, Muscular, Finned, Small, Wide-ranging Pelagic Facies	1	Klapper & Barrick, 1978; Briggs et al., 1983; Signor & Vermeij, 1994	Absent	N/A
Pandorinellina	Sepkoski, 2002	Chordata	Conodonta		CONODONTOPHORIDA		D	Gedi-u	C	Tour-l	Nektic	Planktonekton	Compressed, Muscular, Finned, Small, Wide-ranging Pelagic Facies	1	Klapper & Barrick, 1978; Briggs et al., 1983; Signor & Vermeij, 1994	Absent	N/A
Parabelodina	Sepkoski, 2002	Chordata	Conodonta		CONODONTOPHORIDA		O	Ashg	O	Ashg	Nektic	Planktonekton	Compressed, Muscular, Finned, Small, Wide-ranging Pelagic Facies	1	Klapper & Barrick, 1978; Briggs et al., 1983; Signor & Vermeij, 1994	Absent	N/A
Paracordylodus	Sepkoski, 2002	Chordata	Conodonta		CONODONTOPHORIDA		O	Trem-u	O	Aren-l	Nektic	Planktonekton	Compressed, Muscular, Finned, Small, Wide-ranging Pelagic Facies	1	Klapper & Barrick, 1978; Briggs et al., 1983; Signor & Vermeij, 1994	Absent	N/A
Parapaltodus	Sepkoski, 2002	Chordata	Conodonta		CONODONTOPHORIDA		O	Llvi	O	Llvi	Nektic	Planktonekton	Compressed, Muscular, Finned, Small, Wide-ranging Pelagic Facies	1	Klapper & Barrick, 1978; Briggs et al., 1983; Signor & Vermeij, 1994	Absent	N/A
Paraprionodus	Sepkoski, 2002	Chordata	Conodonta		CONODONTOPHORIDA		O	Aren-u	O	Aren-u	Nektic	Planktonekton	Compressed, Muscular, Finned, Small, Wide-ranging Pelagic Facies	1	Klapper & Barrick, 1978; Briggs et al., 1983; Signor & Vermeij, 1994	Absent	N/A
Paraserratognathus	Sepkoski, 2002	Chordata	Conodonta		CONODONTOPHORIDA		O	Aren-l	O	Aren-l	Nektic	Planktonekton	Compressed, Muscular, Finned, Small, Wide-ranging Pelagic Facies	1	Klapper & Barrick, 1978; Briggs et al., 1983; Signor & Vermeij, 1994	Absent	N/A
Paroistodus	Sepkoski, 2002	Chordata	Conodonta		CONODONTOPHORIDA		O	Trem-l	O	Llvi-l	Nektic	Planktonekton	Compressed, Muscular, Finned, Small, Wide-ranging Pelagic Facies	1	Klapper & Barrick, 1978; Briggs et al., 1983; Signor & Vermeij, 1994	Absent	N/A
Parutahconus	Sepkoski, 2002	Chordata	Conodonta		CONODONTOPHORIDA		O	Trem-l	O	Trem-l	Nektic	Planktonekton	Compressed, Muscular, Finned, Small, Wide-ranging Pelagic Facies	1	Klapper & Barrick, 1978; Briggs et al., 1983; Signor & Vermeij, 1994	Absent	N/A
Patrognathus	Sepkoski, 2002	Chordata	Conodonta		CONODONTOPHORIDA		D	Fame-u	C	Tour-u	Nektic	Planktonekton	Compressed, Muscular, Finned, Small, Wide-ranging Pelagic Facies	1	Klapper & Barrick, 1978; Briggs et al., 1983; Signor & Vermeij, 1994	Absent	N/A
Pavlovites	Sepkoski, 2002	Chordata	Conodonta		CONODONTOPHORIDA		P	Leon-m	P	Leon-m	Nektic	Planktonekton	Compressed, Muscular, Finned, Small, Wide-ranging Pelagic Facies	1	Klapper & Barrick, 1978; Briggs et al., 1983; Signor & Vermeij, 1994	Absent	N/A
Pedavis	Sepkoski, 2002	Chordata	Conodonta		CONODONTOPHORIDA		S	Ludl-u	D	Sieg-l	Nektic	Planktonekton	Compressed, Muscular, Finned, Small, Wide-ranging Pelagic Facies	1	Klapper & Barrick, 1978; Briggs et al., 1983; Signor & Vermeij, 1994	Absent	N/A
Pelekysgnathus	Sepkoski, 2002	Chordata	Conodonta		CONODONTOPHORIDA		S	Ludl-u	D	Fame-u	Nektic	Planktonekton	Compressed, Muscular, Finned, Small, Wide-ranging Pelagic Facies	1	Klapper & Barrick, 1978; Briggs et al., 1983; Signor & Vermeij, 1994	Absent	N/A
Periodon	Sepkoski, 2002	Chordata	Conodonta		CONODONTOPHORIDA		O	Aren-l	O	Cara-u	Nektic	Planktonekton	Compressed, Muscular, Finned, Small, Wide-ranging Pelagic Facies	1	Klapper & Barrick, 1978; Briggs et al., 1983; Signor & Vermeij, 1994	Absent	N/A
Phragmodus	Sepkoski, 2002	Chordata	Conodonta		CONODONTOPHORIDA		O	Aren-u	O	Ashg-u	Nektic	Planktonekton	Compressed, Muscular, Finned, Small, Wide-ranging Pelagic Facies	1	Klapper & Barrick, 1978; Briggs et al., 1983; Signor & Vermeij, 1994	Absent	N/A
Pinacognathus	Sepkoski, 2002	Chordata	Conodonta		CONODONTOPHORIDA		C	Tour-l	C	Tour-l	Nektic	Planktonekton	Compressed, Muscular, Finned, Small, Wide-ranging Pelagic Facies	1	Klapper & Barrick, 1978; Briggs et al., 1983; Signor & Vermeij, 1994	Absent	N/A
Playfordia	Sepkoski, 2002	Chordata	Conodonta		CONODONTOPHORIDA		D	Fras-l	D	Fras-l	Nektic	Planktonekton	Compressed, Muscular, Finned, Small, Wide-ranging Pelagic Facies	1	Klapper & Barrick, 1978; Briggs et al., 1983; Signor & Vermeij, 1994	Absent	N/A
Plectodina	Sepkoski, 2002	Chordata	Conodonta		CONODONTOPHORIDA		O	Aren-u	O	Ashg-m	Nektic	Planktonekton	Compressed, Muscular, Finned, Small, Wide-ranging Pelagic Facies	1	Klapper & Barrick, 1978; Briggs et al., 1983; Signor & Vermeij, 1994	Absent	N/A
Plegagnathus	Sepkoski, 2002	Chordata	Conodonta		CONODONTOPHORIDA		O	Cara-u	O	Ashg-u	Nektic	Planktonekton	Compressed, Muscular, Finned, Small, Wide-ranging Pelagic Facies	1	Klapper & Barrick, 1978; Briggs et al., 1983; Signor & Vermeij, 1994	Absent	N/A
Polonodus	Sepkoski, 2002	Chordata	Conodonta		CONODONTOPHORIDA		O	Aren-u	O	Ashg-m	Nektic	Planktonekton	Compressed, Muscular, Finned, Small, Wide-ranging Pelagic Facies	1	Klapper & Barrick, 1978; Briggs et al., 1983; Signor & Vermeij, 1994	Absent	N/A
Polygnathellus	Sepkoski, 2002	Chordata	Conodonta		CONODONTOPHORIDA		D	Fras-m	D	Fras-m	Nektic	Planktonekton	Compressed, Muscular, Finned, Small, Wide-ranging Pelagic Facies	1	Klapper & Barrick, 1978; Briggs et al., 1983; Signor & Vermeij, 1994	Absent	N/A
Polygnathoides	Sepkoski, 2002	Chordata	Conodonta		CONODONTOPHORIDA		S	Ludl-l	S	Ludl-u	Nektic	Planktonekton	Compressed, Muscular, Finned, Small, Wide-ranging Pelagic Facies	1	Klapper & Barrick, 1978; Briggs et al., 1983; Signor & Vermeij, 1994	Absent	N/A
Polygnathus	Sepkoski, 2002	Chordata	Conodonta		CONODONTOPHORIDA		D	Sieg-u	C	Vise-l	Nektic	Planktonekton	Compressed, Muscular, Finned, Small, Wide-ranging Pelagic Facies	1	Klapper & Barrick, 1978; Briggs et al., 1983; Signor & Vermeij, 1994	Absent	N/A
Polylophodonta	Sepkoski, 2002	Chordata	Conodonta		CONODONTOPHORIDA		D	Fame-l	D	Fame-l	Nektic	Planktonekton	Compressed, Muscular, Finned, Small, Wide-ranging Pelagic Facies	1	Klapper & Barrick, 1978; Briggs et al., 1983; Signor & Vermeij, 1994	Absent	N/A
Polyplacognathus	Sepkoski, 2002	Chordata	Conodonta		CONODONTOPHORIDA		O	Cara-m	O	Cara-u	Nektic	Planktonekton	Compressed, Muscular, Finned, Small, Wide-ranging Pelagic Facies	1	Klapper & Barrick, 1978; Briggs et al., 1983; Signor & Vermeij, 1994	Absent	N/A
Pranognathus	Sepkoski, 2002	Chordata	Conodonta		CONODONTOPHORIDA		S	Ldov	S	Ldov	Nektic	Planktonekton	Compressed, Muscular, Finned, Small, Wide-ranging Pelagic Facies	1	Klapper & Barrick, 1978; Briggs et al., 1983; Signor & Vermeij, 1994	Absent	N/A
Prattognathus	Sepkoski, 2002	Chordata	Conodonta		CONODONTOPHORIDA		O	Llvi-u	O	Llvi-u	Nektic	Planktonekton	Compressed, Muscular, Finned, Small, Wide-ranging Pelagic Facies	1	Klapper & Barrick, 1978; Briggs et al., 1983; Signor & Vermeij, 1994	Absent	N/A
Pravognathus	Sepkoski, 2002	Chordata	Conodonta		CONODONTOPHORIDA		O	Llde-u	O	Cara-l	Nektic	Planktonekton	Compressed, Muscular, Finned, Small, Wide-ranging Pelagic Facies	1	Klapper & Barrick, 1978; Briggs et al., 1983; Signor & Vermeij, 1994	Absent	N/A
Prioniodina	Sepkoski, 2002	Chordata	Conodonta		CONODONTOPHORIDA		D	Fras-m	D	Fras-m	Nektic	Planktonekton	Compressed, Muscular, Finned, Small, Wide-ranging Pelagic Facies	1	Klapper & Barrick, 1978; Briggs et al., 1983; Signor & Vermeij, 1994	Absent	N/A
Prioniodus	Sepkoski, 2002	Chordata	Conodonta		CONODONTOPHORIDA		O	Trem-u	O	Llvi-l	Nektic	Planktonekton	Compressed, Muscular, Finned, Small, Wide-ranging Pelagic Facies	1	Klapper & Barrick, 1978; Briggs et al., 1983; Signor & Vermeij, 1994	Absent	N/A
Pristognathus	Sepkoski, 2002	Chordata	Conodonta		CONODONTOPHORIDA		O	Ashg-l	O	Ashg-m	Nektic	Planktonekton	Compressed, Muscular, Finned, Small, Wide-ranging Pelagic Facies	1	Klapper & Barrick, 1978; Briggs et al., 1983; Signor & Vermeij, 1994	Absent	N/A
Proconodontus	Sepkoski, 2002	Chordata	Conodonta		CONODONTOPHORIDA		Cm	Dres	O	Trem-l	Nektic	Planktonekton	Compressed, Muscular, Finned, Small, Wide-ranging Pelagic Facies	1	Klapper & Barrick, 1978; Briggs et al., 1983; Signor & Vermeij, 1994	Absent	N/A
Protognathodus	Sepkoski, 2002	Chordata	Conodonta		CONODONTOPHORIDA		D	Fame-u	C	Tour-u	Nektic	Planktonekton	Compressed, Muscular, Finned, Small, Wide-ranging Pelagic Facies	1	Klapper & Barrick, 1978; Briggs et al., 1983; Signor & Vermeij, 1994	Absent	N/A
Protopanderodus	Sepkoski, 2002	Chordata	Conodonta		CONODONTOPHORIDA		O	Aren-l	O	Ashg-m	Nektic	Planktonekton	Compressed, Muscular, Finned, Small, Wide-ranging Pelagic Facies	1	Klapper & Barrick, 1978; Briggs et al., 1983; Signor & Vermeij, 1994	Absent	N/A
Protoprioniodus	Sepkoski, 2002	Chordata	Conodonta		CONODONTOPHORIDA		O	Aren-l	O	Aren-u	Nektic	Planktonekton	Compressed, Muscular, Finned, Small, Wide-ranging Pelagic Facies	1	Klapper & Barrick, 1978; Briggs et al., 1983; Signor & Vermeij, 1994	Absent	N/A
Pseudobelodina	Sepkoski, 2002	Chordata	Conodonta		CONODONTOPHORIDA		O	Cara-l	O	Ashg-m	Nektic	Planktonekton	Compressed, Muscular, Finned, Small, Wide-ranging Pelagic Facies	1	Klapper & Barrick, 1978; Briggs et al., 1983; Signor & Vermeij, 1994	Absent	N/A
Pseudooneotodus	Sepkoski, 2002	Chordata	Conodonta		CONODONTOPHORIDA		O	Llvi-u	D	Sieg	Nektic	Planktonekton	Compressed, Muscular, Finned, Small, Wide-ranging Pelagic Facies	1	Klapper & Barrick, 1978; Briggs et al., 1983; Signor & Vermeij, 1994	Absent	N/A
Pseudopolygnathus	Sepkoski, 2002	Chordata	Conodonta		CONODONTOPHORIDA		D	Fame-m	C	Tour-u	Nektic	Planktonekton	Compressed, Muscular, Finned, Small, Wide-ranging Pelagic Facies	1	Klapper & Barrick, 1978; Briggs et al., 1983; Signor & Vermeij, 1994	Absent	N/A
Pseudosweetognathus	Sepkoski, 2002	Chordata	Conodonta		CONODONTOPHORIDA		P	Leon-l	P	Leon-l	Nektic	Planktonekton	Compressed, Muscular, Finned, Small, Wide-ranging Pelagic Facies	1	Klapper & Barrick, 1978; Briggs et al., 1983; Signor & Vermeij, 1994	Absent	N/A
Pteracontiodus	Sepkoski, 2002	Chordata	Conodonta		CONODONTOPHORIDA		O	Trem-u	O	Cara-m	Nektic	Planktonekton	Compressed, Muscular, Finned, Small, Wide-ranging Pelagic Facies	1	Klapper & Barrick, 1978; Briggs et al., 1983; Signor & Vermeij, 1994	Absent	N/A
Pterospathodus	Sepkoski, 2002	Chordata	Conodonta		CONODONTOPHORIDA		S	Ldov-u	S	Wenl-l	Nektic	Planktonekton	Compressed, Muscular, Finned, Small, Wide-ranging Pelagic Facies	1	Klapper & Barrick, 1978; Briggs et al., 1983; Signor & Vermeij, 1994	Absent	N/A
Ptilognathus	Sepkoski, 2002	Chordata	Conodonta		CONODONTOPHORIDA		C	Serp	C	Serp	Nektic	Planktonekton	Compressed, Muscular, Finned, Small, Wide-ranging Pelagic Facies	1	Klapper & Barrick, 1978; Briggs et al., 1983; Signor & Vermeij, 1994	Absent	N/A
Pygodus	Sepkoski, 2002	Chordata	Conodonta		CONODONTOPHORIDA		O	Llvi-u	O	Cara-l	Nektic	Planktonekton	Compressed, Muscular, Finned, Small, Wide-ranging Pelagic Facies	1	Klapper & Barrick, 1978; Briggs et al., 1983; Signor & Vermeij, 1994	Absent	N/A
Rabeignathus	Sepkoski, 2002	Chordata	Conodonta		CONODONTOPHORIDA		P	Leon-u	P	Leon-u	Nektic	Planktonekton	Compressed, Muscular, Finned, Small, Wide-ranging Pelagic Facies	1	Klapper & Barrick, 1978; Briggs et al., 1983; Signor & Vermeij, 1994	Absent	N/A
Reutterodus	Sepkoski, 2002	Chordata	Conodonta		CONODONTOPHORIDA		O	Aren-l	O	Aren-l	Nektic	Planktonekton	Compressed, Muscular, Finned, Small, Wide-ranging Pelagic Facies	1	Klapper & Barrick, 1978; Briggs et al., 1983; Signor & Vermeij, 1994	Absent	N/A
Rhachistognathus	Sepkoski, 2002	Chordata	Conodonta		CONODONTOPHORIDA		C	Vise-u	C	Step-l	Nektic	Planktonekton	Compressed, Muscular, Finned, Small, Wide-ranging Pelagic Facies	1	Klapper & Barrick, 1978; Briggs et al., 1983; Signor & Vermeij, 1994	Absent	N/A
Rhipidognathus	Sepkoski, 2002	Chordata	Conodonta		CONODONTOPHORIDA		O	Aren-u	O	Ashg-m	Nektic	Planktonekton	Compressed, Muscular, Finned, Small, Wide-ranging Pelagic Facies	1	Klapper & Barrick, 1978; Briggs et al., 1983; Signor & Vermeij, 1994	Absent	N/A
Rhodalepus	Sepkoski, 2002	Chordata	Conodonta		CONODONTOPHORIDA		D	Fame-u	D	Fame-u	Nektic	Planktonekton	Compressed, Muscular, Finned, Small, Wide-ranging Pelagic Facies	1	Klapper & Barrick, 1978; Briggs et al., 1983; Signor & Vermeij, 1994	Absent	N/A
Rhodesognathus	Sepkoski, 2002	Chordata	Conodonta		CONODONTOPHORIDA		O	Llde	O	Ashg-l	Nektic	Planktonekton	Compressed, Muscular, Finned, Small, Wide-ranging Pelagic Facies	1	Klapper & Barrick, 1978; Briggs et al., 1983; Signor & Vermeij, 1994	Absent	N/A
Rossodus	Sepkoski, 2002	Chordata	Conodonta		CONODONTOPHORIDA		O	Trem-u	O	Trem-u	Nektic	Planktonekton	Compressed, Muscular, Finned, Small, Wide-ranging Pelagic Facies	1	Klapper & Barrick, 1978; Briggs et al., 1983; Signor & Vermeij, 1994	Absent	N/A
Rotundacodina	Sepkoski, 2002	Chordata	Conodonta		CONODONTOPHORIDA		S	Ldov-l	S	Prid	Nektic	Planktonekton	Compressed, Muscular, Finned, Small, Wide-ranging Pelagic Facies	1	Klapper & Barrick, 1978; Briggs et al., 1983; Signor & Vermeij, 1994	Absent	N/A
Roundya	Sepkoski, 2002	Chordata	Conodonta		CONODONTOPHORIDA		C	Serp	C	Bash	Nektic	Planktonekton	Compressed, Muscular, Finned, Small, Wide-ranging Pelagic Facies	1	Klapper & Barrick, 1978; Briggs et al., 1983; Signor & Vermeij, 1994	Absent	N/A
Sagittodontina	Sepkoski, 2002	Chordata	Conodonta		CONODONTOPHORIDA		O	Llvi	O	Ashg-m	Nektic	Planktonekton	Compressed, Muscular, Finned, Small, Wide-ranging Pelagic Facies	1	Klapper & Barrick, 1978; Briggs et al., 1983; Signor & Vermeij, 1994	Absent	N/A
Sannemannia	Sepkoski, 2002	Chordata	Conodonta		CONODONTOPHORIDA		D	Gedi-u	D	Give-u	Nektic	Planktonekton	Compressed, Muscular, Finned, Small, Wide-ranging Pelagic Facies	1	Klapper & Barrick, 1978; Briggs et al., 1983; Signor & Vermeij, 1994	Absent	N/A
Scabbardella	Sepkoski, 2002	Chordata	Conodonta		CONODONTOPHORIDA		O	Cara-l	O	Ashg-m	Nektic	Planktonekton	Compressed, Muscular, Finned, Small, Wide-ranging Pelagic Facies	1	Klapper & Barrick, 1978; Briggs et al., 1983; Signor & Vermeij, 1994	Absent	N/A
Scaliognathus	Sepkoski, 2002	Chordata	Conodonta		CONODONTOPHORIDA		C	Tour-u	C	Vise-l	Nektic	Planktonekton	Compressed, Muscular, Finned, Small, Wide-ranging Pelagic Facies	1	Klapper & Barrick, 1978; Briggs et al., 1983; Signor & Vermeij, 1994	Absent	N/A
Scalpellodus	Sepkoski, 2002	Chordata	Conodonta		CONODONTOPHORIDA		O	Trem-u	O	Cara-u	Nektic	Planktonekton	Compressed, Muscular, Finned, Small, Wide-ranging Pelagic Facies	1	Klapper & Barrick, 1978; Briggs et al., 1983; Signor & Vermeij, 1994	Absent	N/A
Scaphignathus	Sepkoski, 2002	Chordata	Conodonta		CONODONTOPHORIDA		D	Fame-m	D	Fame-m	Nektic	Planktonekton	Compressed, Muscular, Finned, Small, Wide-ranging Pelagic Facies	1	Klapper & Barrick, 1978; Briggs et al., 1983; Signor & Vermeij, 1994	Absent	N/A
Schmidtognathus	Sepkoski, 2002	Chordata	Conodonta		CONODONTOPHORIDA		D	Give-u	D	Give-u	Nektic	Planktonekton	Compressed, Muscular, Finned, Small, Wide-ranging Pelagic Facies	1	Klapper & Barrick, 1978; Briggs et al., 1983; Signor & Vermeij, 1994	Absent	N/A
Schopfodus	Sepkoski, 2002	Chordata	Conodonta		CONODONTOPHORIDA		O	Cara-l	O	Cara-m	Nektic	Planktonekton	Compressed, Muscular, Finned, Small, Wide-ranging Pelagic Facies	1	Klapper & Barrick, 1978; Briggs et al., 1983; Signor & Vermeij, 1994	Absent	N/A
Scolopodus	Sepkoski, 2002	Chordata	Conodonta		CONODONTOPHORIDA		O	Trem-u	O	Ashg	Nektic	Planktonekton	Compressed, Muscular, Finned, Small, Wide-ranging Pelagic Facies	1	Klapper & Barrick, 1978; Briggs et al., 1983; Signor & Vermeij, 1994	Absent	N/A
Scyphiodus	Sepkoski, 2002	Chordata	Conodonta		CONODONTOPHORIDA		O	Cara-m	O	Cara-m	Nektic	Planktonekton	Compressed, Muscular, Finned, Small, Wide-ranging Pelagic Facies	1	Klapper & Barrick, 1978; Briggs et al., 1983; Signor & Vermeij, 1994	Absent	N/A
Semiacontiodus	Sepkoski, 2002	Chordata	Conodonta		CONODONTOPHORIDA		O	Trem-l	O	Cara-m	Nektic	Planktonekton	Compressed, Muscular, Finned, Small, Wide-ranging Pelagic Facies	1	Klapper & Barrick, 1978; Briggs et al., 1983; Signor & Vermeij, 1994	Absent	N/A
Serratognathus	Sepkoski, 2002	Chordata	Conodonta		CONODONTOPHORIDA		O	Aren-l	O	Aren-u	Nektic	Planktonekton	Compressed, Muscular, Finned, Small, Wide-ranging Pelagic Facies	1	Klapper & Barrick, 1978; Briggs et al., 1983; Signor & Vermeij, 1994	Absent	N/A
Sibiriodus	Sepkoski, 2002	Chordata	Conodonta		CONODONTOPHORIDA		O	Llde-l	O	Llde-l	Nektic	Planktonekton	Compressed, Muscular, Finned, Small, Wide-ranging Pelagic Facies	1	Klapper & Barrick, 1978; Briggs et al., 1983; Signor & Vermeij, 1994	Absent	N/A
Siphonodella	Sepkoski, 2002	Chordata	Conodonta		CONODONTOPHORIDA		D	Fame-u	C	Vise-l	Nektic	Planktonekton	Compressed, Muscular, Finned, Small, Wide-ranging Pelagic Facies	1	Klapper & Barrick, 1978; Briggs et al., 1983; Signor & Vermeij, 1994	Absent	N/A
Spinodus	Sepkoski, 2002	Chordata	Conodonta		CONODONTOPHORIDA		O	Llvi-u	O	Cara-l	Nektic	Planktonekton	Compressed, Muscular, Finned, Small, Wide-ranging Pelagic Facies	1	Klapper & Barrick, 1978; Briggs et al., 1983; Signor & Vermeij, 1994	Absent	N/A
Staufferella	Sepkoski, 2002	Chordata	Conodonta		CONODONTOPHORIDA		O	Llvi-u	O	Ashg-u	Nektic	Planktonekton	Compressed, Muscular, Finned, Small, Wide-ranging Pelagic Facies	1	Klapper & Barrick, 1978; Briggs et al., 1983; Signor & Vermeij, 1994	Absent	N/A
Staurognathus	Sepkoski, 2002	Chordata	Conodonta		CONODONTOPHORIDA		C	Tour-u	C	Tour-u	Nektic	Planktonekton	Compressed, Muscular, Finned, Small, Wide-ranging Pelagic Facies	1	Klapper & Barrick, 1978; Briggs et al., 1983; Signor & Vermeij, 1994	Absent	N/A
Steptotaxis	Sepkoski, 2002	Chordata	Conodonta		CONODONTOPHORIDA		D	Emsi-l	D	Eife-l	Nektic	Planktonekton	Compressed, Muscular, Finned, Small, Wide-ranging Pelagic Facies	1	Klapper & Barrick, 1978; Briggs et al., 1983; Signor & Vermeij, 1994	Absent	N/A
Stereoconus	Sepkoski, 2002	Chordata	Conodonta		CONODONTOPHORIDA		O	Llde-l	O	Cara-m	Nektic	Planktonekton	Compressed, Muscular, Finned, Small, Wide-ranging Pelagic Facies	1	Klapper & Barrick, 1978; Briggs et al., 1983; Signor & Vermeij, 1994	Absent	N/A
Stolodus	Sepkoski, 2002	Chordata	Conodonta		CONODONTOPHORIDA		O	Aren-l	O	Aren-l	Nektic	Planktonekton	Compressed, Muscular, Finned, Small, Wide-ranging Pelagic Facies	1	Klapper & Barrick, 1978; Briggs et al., 1983; Signor & Vermeij, 1994	Absent	N/A
Strachanognathus	Sepkoski, 2002	Chordata	Conodonta		CONODONTOPHORIDA		O	Aren-u	O	Ashg-u	Nektic	Planktonekton	Compressed, Muscular, Finned, Small, Wide-ranging Pelagic Facies	1	Klapper & Barrick, 1978; Briggs et al., 1983; Signor & Vermeij, 1994	Absent	N/A
Streptognathodus	Sepkoski, 2002	Chordata	Conodonta		CONODONTOPHORIDA		C	Serp-u	P	Leon	Nektic	Planktonekton	Compressed, Muscular, Finned, Small, Wide-ranging Pelagic Facies	1	Klapper & Barrick, 1978; Briggs et al., 1983; Signor & Vermeij, 1994	Absent	N/A
Subbryantodus	Sepkoski, 2002	Chordata	Conodonta		CONODONTOPHORIDA		D	Fame	C	Serp-l	Nektic	Planktonekton	Compressed, Muscular, Finned, Small, Wide-ranging Pelagic Facies	1	Klapper & Barrick, 1978; Briggs et al., 1983; Signor & Vermeij, 1994	Absent	N/A
Sweetina	Sepkoski, 2002	Chordata	Conodonta		CONODONTOPHORIDA		P	Leon-m	P	Guad-l	Nektic	Planktonekton	Compressed, Muscular, Finned, Small, Wide-ranging Pelagic Facies	1	Klapper & Barrick, 1978; Briggs et al., 1983; Signor & Vermeij, 1994	Absent	N/A
Sweetocristatus	Sepkoski, 2002	Chordata	Conodonta		CONODONTOPHORIDA		P	Leon-m	P	Leon-u	Nektic	Planktonekton	Compressed, Muscular, Finned, Small, Wide-ranging Pelagic Facies	1	Klapper & Barrick, 1978; Briggs et al., 1983; Signor & Vermeij, 1994	Absent	N/A
Sweetognathus	Sepkoski, 2002	Chordata	Conodonta		CONODONTOPHORIDA		P	Sakm-l	P	Guad-u	Nektic	Planktonekton	Compressed, Muscular, Finned, Small, Wide-ranging Pelagic Facies	1	Klapper & Barrick, 1978; Briggs et al., 1983; Signor & Vermeij, 1994	Absent	N/A
Tangshanodus	Sepkoski, 2002	Chordata	Conodonta		CONODONTOPHORIDA		O	Aren-u	O	Llvi-l	Nektic	Planktonekton	Compressed, Muscular, Finned, Small, Wide-ranging Pelagic Facies	1	Klapper & Barrick, 1978; Briggs et al., 1983; Signor & Vermeij, 1994	Absent	N/A
Taoqupognathus	Sepkoski, 2002	Chordata	Conodonta		CONODONTOPHORIDA		O	Cara-l	O	Cara-l	Nektic	Planktonekton	Compressed, Muscular, Finned, Small, Wide-ranging Pelagic Facies	1	Klapper & Barrick, 1978; Briggs et al., 1983; Signor & Vermeij, 1994	Absent	N/A
Taphrognathus	Sepkoski, 2002	Chordata	Conodonta		CONODONTOPHORIDA		C	Vise-l	C	Vise-u	Nektic	Planktonekton	Compressed, Muscular, Finned, Small, Wide-ranging Pelagic Facies	1	Klapper & Barrick, 1978; Briggs et al., 1983; Signor & Vermeij, 1994	Absent	N/A
Tasmanognathus	Sepkoski, 2002	Chordata	Conodonta		CONODONTOPHORIDA		O	Cara-l	O	Cara-l	Nektic	Planktonekton	Compressed, Muscular, Finned, Small, Wide-ranging Pelagic Facies	1	Klapper & Barrick, 1978; Briggs et al., 1983; Signor & Vermeij, 1994	Absent	N/A
Teridontus	Sepkoski, 2002	Chordata	Conodonta		CONODONTOPHORIDA		Cm	Fran-u	O	Trem-u	Nektic	Planktonekton	Compressed, Muscular, Finned, Small, Wide-ranging Pelagic Facies	1	Klapper & Barrick, 1978; Briggs et al., 1983; Signor & Vermeij, 1994	Absent	N/A
Tortodus	Sepkoski, 2002	Chordata	Conodonta		CONODONTOPHORIDA		D	Eife-l	D	Eife-u	Nektic	Planktonekton	Compressed, Muscular, Finned, Small, Wide-ranging Pelagic Facies	1	Klapper & Barrick, 1978; Briggs et al., 1983; Signor & Vermeij, 1994	Absent	N/A
Tripodus	Sepkoski, 2002	Chordata	Conodonta		CONODONTOPHORIDA		O	Aren-l	O	Llvi-l	Nektic	Planktonekton	Compressed, Muscular, Finned, Small, Wide-ranging Pelagic Facies	1	Klapper & Barrick, 1978; Briggs et al., 1983; Signor & Vermeij, 1994	Absent	N/A
Tropodus	Sepkoski, 2002	Chordata	Conodonta		CONODONTOPHORIDA		O	Trem-u	O	Aren-u	Nektic	Planktonekton	Compressed, Muscular, Finned, Small, Wide-ranging Pelagic Facies	1	Klapper & Barrick, 1978; Briggs et al., 1983; Signor & Vermeij, 1994	Absent	N/A
Tuxekania	Sepkoski, 2002	Chordata	Conodonta		CONODONTOPHORIDA		S	Ldov-u	S	Wenl-l	Nektic	Planktonekton	Compressed, Muscular, Finned, Small, Wide-ranging Pelagic Facies	1	Klapper & Barrick, 1978; Briggs et al., 1983; Signor & Vermeij, 1994	Absent	N/A
Ulrichodina	Sepkoski, 2002	Chordata	Conodonta		CONODONTOPHORIDA		O	Trem-u	O	Aren-u	Nektic	Planktonekton	Compressed, Muscular, Finned, Small, Wide-ranging Pelagic Facies	1	Klapper & Barrick, 1978; Briggs et al., 1983; Signor & Vermeij, 1994	Absent	N/A
Utahconus	Sepkoski, 2002	Chordata	Conodonta		CONODONTOPHORIDA		O	Trem-l	O	Trem-u	Nektic	Planktonekton	Compressed, Muscular, Finned, Small, Wide-ranging Pelagic Facies	1	Klapper & Barrick, 1978; Briggs et al., 1983; Signor & Vermeij, 1994	Absent	N/A
Variabiloconus	Sepkoski, 2002	Chordata	Conodonta		CONODONTOPHORIDA		O	Trem-l	O	Aren-l	Nektic	Planktonekton	Compressed, Muscular, Finned, Small, Wide-ranging Pelagic Facies	1	Klapper & Barrick, 1978; Briggs et al., 1983; Signor & Vermeij, 1994	Absent	N/A
Volgelgnathus	Sepkoski, 2002	Chordata	Conodonta		CONODONTOPHORIDA		C	Vise-u	C	Serp-u	Nektic	Planktonekton	Compressed, Muscular, Finned, Small, Wide-ranging Pelagic Facies	1	Klapper & Barrick, 1978; Briggs et al., 1983; Signor & Vermeij, 1994	Absent	N/A
Walliserodus	Sepkoski, 2002	Chordata	Conodonta		CONODONTOPHORIDA		O	Aren-l	S	Prid	Nektic	Planktonekton	Compressed, Muscular, Finned, Small, Wide-ranging Pelagic Facies	1	Klapper & Barrick, 1978; Briggs et al., 1983; Signor & Vermeij, 1994	Absent	N/A
Windsorgnathus	Sepkoski, 2002	Chordata	Conodonta		CONODONTOPHORIDA		C	Vise-u	C	Vise-u	Nektic	Planktonekton	Compressed, Muscular, Finned, Small, Wide-ranging Pelagic Facies	1	Klapper & Barrick, 1978; Briggs et al., 1983; Signor & Vermeij, 1994	Absent	N/A
Xaniognathus	Sepkoski, 2002	Chordata	Conodonta		CONODONTOPHORIDA		P	Leon-u	Tr	Nori-l	Nektic	Planktonekton	Compressed, Muscular, Finned, Small, Wide-ranging Pelagic Facies	1	Klapper & Barrick, 1978; Briggs et al., 1983; Signor & Vermeij, 1994	Absent	N/A
Yaoxianognathus	Sepkoski, 2002	Chordata	Conodonta		CONODONTOPHORIDA		O	Cara-m	O	Ashg-l	Nektic	Planktonekton	Compressed, Muscular, Finned, Small, Wide-ranging Pelagic Facies	1	Klapper & Barrick, 1978; Briggs et al., 1983; Signor & Vermeij, 1994	Absent	N/A
Albiconus	Sepkoski, 2002	Chordata	Conodonta		PARACONODONTIDA		O	Trem-l	O	Trem-l	Nektic	Planktonekton	Compressed, Muscular, Finned, Small, Wide-ranging Pelagic Facies	1	Klapper & Barrick, 1978; Briggs et al., 1983; Signor & Vermeij, 1994	Absent	N/A
Furnishina	Sepkoski, 2002	Chordata	Conodonta		PARACONODONTIDA		Cm	mMid-u	O	Trem-l	Nektic	Planktonekton	Compressed, Muscular, Finned, Small, Wide-ranging Pelagic Facies	1	Klapper & Barrick, 1978; Briggs et al., 1983; Signor & Vermeij, 1994	Absent	N/A
Hertzina	Sepkoski, 2002	Chordata	Conodonta		PARACONODONTIDA		Cm	m	Cm	Fran-l	Nektic	Planktonekton	Compressed, Muscular, Finned, Small, Wide-ranging Pelagic Facies	1	Klapper & Barrick, 1978; Briggs et al., 1983; Signor & Vermeij, 1994	Absent	N/A
Muellerodus	Sepkoski, 2002	Chordata	Conodonta		PARACONODONTIDA		Cm	m	Cm	Dres-u	Nektic	Planktonekton	Compressed, Muscular, Finned, Small, Wide-ranging Pelagic Facies	1	Klapper & Barrick, 1978; Briggs et al., 1983; Signor & Vermeij, 1994	Absent	N/A
Nogamiconus	Sepkoski, 2002	Chordata	Conodonta		PARACONODONTIDA		Cm	m	O	Trem	Nektic	Planktonekton	Compressed, Muscular, Finned, Small, Wide-ranging Pelagic Facies	1	Klapper & Barrick, 1978; Briggs et al., 1983; Signor & Vermeij, 1994	Absent	N/A
Proacodus	Sepkoski, 2002	Chordata	Conodonta		PARACONODONTIDA		Cm	m	O	Trem	Nektic	Planktonekton	Compressed, Muscular, Finned, Small, Wide-ranging Pelagic Facies	1	Klapper & Barrick, 1978; Briggs et al., 1983; Signor & Vermeij, 1994	Absent	N/A
Problematoconites	Sepkoski, 2002	Chordata	Conodonta		PARACONODONTIDA		Cm	Trep-l	O	Trem-l	Nektic	Planktonekton	Compressed, Muscular, Finned, Small, Wide-ranging Pelagic Facies	1	Klapper & Barrick, 1978; Briggs et al., 1983; Signor & Vermeij, 1994	Absent	N/A
Prooneotodus	Sepkoski, 2002	Chordata	Conodonta		PARACONODONTIDA		Cm	m	O	Trem-u	Nektic	Planktonekton	Compressed, Muscular, Finned, Small, Wide-ranging Pelagic Facies	1	Klapper & Barrick, 1978; Briggs et al., 1983; Signor & Vermeij, 1994	Absent	N/A
Prosagittodontus	Sepkoski, 2002	Chordata	Conodonta		PARACONODONTIDA		Cm	Fran-l	O	Trem	Nektic	Planktonekton	Compressed, Muscular, Finned, Small, Wide-ranging Pelagic Facies	1	Klapper & Barrick, 1978; Briggs et al., 1983; Signor & Vermeij, 1994	Absent	N/A
Westergaardodina	Sepkoski, 2002	Chordata	Conodonta		PARACONODONTIDA		Cm	mMid-u	O	Llde	Nektic	Planktonekton	Compressed, Muscular, Finned, Small, Wide-ranging Pelagic Facies	1	Klapper & Barrick, 1978; Briggs et al., 1983; Signor & Vermeij, 1994	Absent	N/A
Anjiaspis	Zhu & Gai, 2007	Chordata	Galeaspida		EUGALEASPIDIFORMES		S	Ldov-u	S	Wenl-l	Demersal	Nektobenthos	Depressiform	1	Zhu & Gai, 2007	Absent	Demersal
Eugaleaspis	Zhu & Gai, 2007	Chordata	Galeaspida		EUGALEASPIDIFORMES		S	Wenl	D	Sieg	Demersal	Nektobenthos	Depressiform	1	Zhu & Gai, 2007	Absent	Demersal
Meishanaspis	Zhu & Gai, 2007	Chordata	Galeaspida		EUGALEASPIDIFORMES		S	Ldov-u	S	Wenl-l	Demersal	Nektobenthos	Depressiform	1	Zhu & Gai, 2007	Absent	Demersal
Nochelaspis	Zhu & Gai, 2007	Chordata	Galeaspida		EUGALEASPIDIFORMES		D	Gedi	D	Gedi	Demersal	Nektobenthos	Depressiform	1	Zhu & Gai, 2007	Absent	Demersal
Pterogonaspis	Zhu & Gai, 2007	Chordata	Galeaspida		EUGALEASPIDIFORMES		D	Sieg	D	Sieg	Demersal	Nektobenthos	Depressiform	1	Zhu & Gai, 2007	Absent	Demersal
Yunnanogaleaspis	Zhu & Gai, 2007	Chordata	Galeaspida		EUGALEASPIDIFORMES		D	Gedi	D	Gedi	Demersal	Nektobenthos	Depressiform	1	Zhu & Gai, 2007	Absent	Demersal
Antiquisagittaspis	Zhu & Gai, 2007	Chordata	Galeaspida		HUANANASPIDIFORMES		D	Sieg	D	Sieg	Demersal	Eudemersus	Depressiform, Elongate Rostrum, Slender Cornual Process, Streamlined Head	1	Janvier, 1996; Zhu & Gai, 2007	Absent	Demersal
Asiaspis	Zhu & Gai, 2007	Chordata	Galeaspida		HUANANASPIDIFORMES		D	Sieg	D	Sieg	Demersal	Eudemersus	Depressiform, Elongate Rostrum, Slender Cornual Process, Streamlined Head	1	Janvier, 1996; Zhu & Gai, 2007	Absent	Demersal
Gantarostrataspis	Zhu & Gai, 2007	Chordata	Galeaspida		HUANANASPIDIFORMES		D	Sieg	D	Sieg	Demersal	Eudemersus	Depressiform, Elongate Rostrum, Slender Cornual Process, Streamlined Head	1	Janvier, 1996; Zhu & Gai, 2007	Absent	Demersal
Huananaspis	Zhu & Gai, 2007	Chordata	Galeaspida		HUANANASPIDIFORMES		D	Sieg	D	Sieg	Demersal	Eudemersus	Depressiform, Elongate Rostrum, Slender Cornual Process, Streamlined Head	1	Janvier, 1996; Zhu & Gai, 2007	Absent	Demersal
Lungmenshanaspis	Zhu & Gai, 2007	Chordata	Galeaspida		HUANANASPIDIFORMES		D	Sieg	D	Sieg	Demersal	Eudemersus	Depressiform, Elongate Rostrum, Slender Cornual Process, Streamlined Head	1	Janvier, 1996; Zhu & Gai, 2007	Absent	Demersal
Macrothyraspis	Zhu & Gai, 2007	Chordata	Galeaspida		HUANANASPIDIFORMES		D	Sieg	D	Sieg	Demersal	Eudemersus	Depressiform, Elongate Rostrum, Slender Cornual Process, Streamlined Head	1	Janvier, 1996; Zhu & Gai, 2007	Absent	Demersal
Nanpanaspis	Zhu & Gai, 2007	Chordata	Galeaspida		HUANANASPIDIFORMES		D	Gedi	D	Gedi	Demersal	Eudemersus	Depressiform, Elongate Rostrum, Slender Cornual Process, Streamlined Head	1	Janvier, 1996; Zhu & Gai, 2007	Absent	Demersal
Qingmenaspis	Zhu & Gai, 2007	Chordata	Galeaspida		HUANANASPIDIFORMES		D	Sieg	D	Sieg	Demersal	Eudemersus	Depressiform, Elongate Rostrum, Slender Cornual Process, Streamlined Head	1	Janvier, 1996; Zhu & Gai, 2007	Absent	Demersal
Sanchaspis	Zhu & Gai, 2007	Chordata	Galeaspida		HUANANASPIDIFORMES		D	Sieg	D	Sieg	Demersal	Eudemersus	Depressiform, Elongate Rostrum, Slender Cornual Process, Streamlined Head	1	Janvier, 1996; Zhu & Gai, 2007	Absent	Demersal
Sanqiaspis	Zhu & Gai, 2007	Chordata	Galeaspida		HUANANASPIDIFORMES		D	Sieg	D	Sieg	Demersal	Eudemersus	Depressiform, Elongate Rostrum, Slender Cornual Process, Streamlined Head	1	Janvier, 1996; Zhu & Gai, 2007	Absent	Demersal
Sinoszechuanaspis	Zhu & Gai, 2007	Chordata	Galeaspida		HUANANASPIDIFORMES		D	Sieg	D	Sieg	Demersal	Eudemersus	Depressiform, Elongate Rostrum, Slender Cornual Process, Streamlined Head	1	Janvier, 1996; Zhu & Gai, 2007	Absent	Demersal
Wumengshanaspis	Zhu & Gai, 2007	Chordata	Galeaspida		HUANANASPIDIFORMES		D	Emsi	D	Emsi	Demersal	Eudemersus	Depressiform, Elongate Rostrum, Slender Cornual Process, Streamlined Head	1	Janvier, 1996; Zhu & Gai, 2007	Absent	Demersal
Bannhuanaspis	Zhu & Gai, 2007	Chordata	Galeaspida		POLYBRANCHIASPIDIFORMES		D	Gedi	D	Sieg	Demersal	Nektobenthos	Depressiform	1	Zhu & Gai, 2007	Absent	Demersal
Damaspis	Zhu & Gai, 2007	Chordata	Galeaspida		POLYBRANCHIASPIDIFORMES		D	Gedi	D	Gedi	Demersal	Nektobenthos	Depressiform	1	Zhu & Gai, 2007	Absent	Demersal
Dongfangaspis	Zhu & Gai, 2007	Chordata	Galeaspida		POLYBRANCHIASPIDIFORMES		D	Gedi	D	Sieg	Demersal	Nektobenthos	Depressiform	1	Zhu & Gai, 2007	Absent	Demersal
Duyunolepis	Zhu & Gai, 2007	Chordata	Galeaspida		POLYBRANCHIASPIDIFORMES		D	Emsi	D	Emsi	Demersal	Nektobenthos	Depressiform	1	Zhu & Gai, 2007	Absent	Demersal
Gumuaspis	Zhu & Gai, 2007	Chordata	Galeaspida		POLYBRANCHIASPIDIFORMES		D	Gedi	D	Sieg	Demersal	Nektobenthos	Depressiform	1	Zhu & Gai, 2007	Absent	Demersal
Laxaspis	Zhu & Gai, 2007	Chordata	Galeaspida		POLYBRANCHIASPIDIFORMES		D	Gedi	D	Gedi	Demersal	Nektobenthos	Depressiform	1	Zhu & Gai, 2007	Absent	Demersal
Lopadaspis	Zhu & Gai, 2007	Chordata	Galeaspida		POLYBRANCHIASPIDIFORMES		D	Emsi	D	Emsi	Demersal	Nektobenthos	Depressiform	1	Zhu & Gai, 2007	Absent	Demersal
Microhoplonaspis	Zhu & Gai, 2007	Chordata	Galeaspida		POLYBRANCHIASPIDIFORMES		D	Gedi	D	Gedi	Demersal	Nektobenthos	Depressiform	1	Zhu & Gai, 2007	Absent	Demersal
Pentathyraspis	Zhu & Gai, 2007	Chordata	Galeaspida		POLYBRANCHIASPIDIFORMES		D	Gedi-l	D	Gedi-l	Demersal	Nektobenthos	Depressiform	1	Zhu & Gai, 2007	Absent	Demersal
Polybranchiaspis	Zhu & Gai, 2007	Chordata	Galeaspida		POLYBRANCHIASPIDIFORMES		D	Gedi	D	Gedi	Demersal	Nektobenthos	Depressiform	1	Zhu & Gai, 2007	Absent	Demersal
Dayongaspis	Zhu & Gai, 2007	Chordata	Galeaspida		uncertain	Dayongaspidae	S	Ldov-u	S	Ldov-u	Demersal	Nektobenthos	Depressiform	1	Zhu & Gai, 2007	Absent	Demersal
Geraspis	Zhu & Gai, 2007	Chordata	Galeaspida		uncertain	Geraspididae	S	Ldov-u	S	Ldov-u	Demersal	Nektobenthos	Depressiform	1	Zhu & Gai, 2007	Absent	Demersal
Kwangnanaspis	Zhu & Gai, 2007	Chordata	Galeaspida		uncertain	Geraspididae	D	Sieg	D	Sieg	Demersal	Nektobenthos	Depressiform	1	Zhu & Gai, 2007	Absent	Demersal
Hanyangaspis	Zhu & Gai, 2007	Chordata	Galeaspida		uncertain	Hanyangaspidae	S	Ldov-u	S	Wenl-l	Demersal	Nektobenthos	Depressiform	1	Zhu & Gai, 2007	Absent	Demersal
Changxingaspis	Zhu & Gai, 2007	Chordata	Galeaspida		uncertain	Xiushuiaspidae	S	Ldov-u	S	Wenl-l	Demersal	Nektobenthos	Depressiform	1	Zhu & Gai, 2007	Absent	Demersal
Wenshanaspis	Zhu & Gai, 2007	Chordata	Galeaspida		uncertain	Zhaotongaspididae	D	Sieg	D	Sieg	Demersal	Nektobenthos	Depressiform	1	Zhu & Gai, 2007	Absent	Demersal
Zhaotongaspis	Zhu & Gai, 2007	Chordata	Galeaspida		uncertain	Zhaotongaspididae	D	Sieg	D	Sieg	Demersal	Nektobenthos	Depressiform	1	Zhu & Gai, 2007	Absent	Demersal
Cheirolepis	Sallan & Coates, 2010	Chordata	Osteichthyes	Actinopterygii	CHEIROLEPIFORMES	Cheirolepidae	D	Give-l	D	Give-u	Nektic	Eunekton	Compressiform, Fusiform	1	Arratia & Cloutier, 1996	Absent	Nektic
Guildayichthys	Sallan & Coates, 2010	Chordata	Osteichthyes	Actinopterygii	GUILDAYICHTHYIFORMES	Guildayichthyidae	C	Serp-u	C	Serp-u	Nektic	Eunekton	Compressiform, Deep-Bodied	1	Lund, 2000	Absent	Nektic
Discoserra	Sallan & Coates, 2010	Chordata	Osteichthyes	Actinopterygii	GUILDAYICHTHYIFORMES		C	Serp-u	C	Serp-u	Nektic	Eunekton	Compressiform, Deep-Bodied	1	Lund, 2000	Absent	Nektic
Watsonichthys	Sallan & Coates, 2010	Chordata	Osteichthyes	Actinopterygii	PALAEONISCIFORMES	Acrolepidae	C	Vise-u	C	Serp	Nektic	Eunekton	Compressifrom	0.75	Dunkle & Schaeffer, 1956; Moy-Thomas & Miles, 1971	Absent	Nektic
Aesopichthys	Sallan & Coates, 2010	Chordata	Osteichthyes	Actinopterygii	PALAEONISCIFORMES	Aesopichthyidae	C	Serp-u	C	Serp-u	Nektic	Eunekton	Compressiform, Deep-Bodied	1	Poplin & Lund, 2000	Absent	Nektic
Proceramala	Sallan & Coates, 2010	Chordata	Osteichthyes	Actinopterygii	PALAEONISCIFORMES	Aesopichthyidae	C	Serp-u	C	Serp-u	Nektic	Eunekton	Compressiform, Deep-Bodied	1	Poplin & Lund, 2000	Absent	Nektic
Aestaurichthys	Sallan & Coates, 2010	Chordata	Osteichthyes	Actinopterygii	PALAEONISCIFORMES	Aestuarichthys	C	Vise-l	C	Vise-l	Nektic	Eunekton	Fusiform, Compressed, Deep-Bodied	1	Gardiner, 1969	Absent	Nektic
Adroichthys	Sallan & Coates, 2010	Chordata	Osteichthyes	Actinopterygii	PALAEONISCIFORMES	Amphicentridae	C	Vise-l	C	Vise-l	Nektic	Eunekton	Fusiform, Compressed	1	Gardiner, 1969	Absent	Nektic
Sundayichthys	Sallan & Coates, 2010	Chordata	Osteichthyes	Actinopterygii	PALAEONISCIFORMES	Canobiidae	C	Vise-l	C	Vise-l	Nektic	Eunekton	Fusiform, Compressed	1	Gardiner, 1969	Absent	Nektic
Blairolepis	Sallan & Coates, 2010	Chordata	Osteichthyes	Actinopterygii	PALAEONISCIFORMES	Haplolepidae	C	Serp	C	Serp	Nektic	Eunekton	Compressiform	0.75	Moy-Thomas & Miles, 1971; Elliott, 2015	Absent	Nektic
Protohaplolepis	Sallan & Coates, 2010	Chordata	Osteichthyes	Actinopterygii	PALAEONISCIFORMES	Haplolepidae	C	Serp	C	Serp	Nektic	Eunekton	Compressiform	0.75	Moy-Thomas & Miles, 1971; Elliott, 2015	Absent	Nektic
Australichthys	Sallan & Coates, 2010	Chordata	Osteichthyes	Actinopterygii	PALAEONISCIFORMES	Holuridae	C	Vise-l	C	Vise-l	Nektic	Eunekton	Fusiform, Compressed	1	Gardiner, 1969	Absent	Nektic
Soetendalichthys	Sallan & Coates, 2010	Chordata	Osteichthyes	Actinopterygii	PALAEONISCIFORMES	Platysomidae	C	Vise-l	C	Vise-l	Nektic	Eunekton	Fusiform, Compressed	1	Gardiner, 1969	Absent	Nektic
Mentzichthys	Sallan & Coates, 2010	Chordata	Osteichthyes	Actinopterygii	PALAEONISCIFORMES	Rhadinichthyidae	C	Vise-l	C	Vise-l	Nektic	Eunekton	Fusiform, Compressed	1	Gardiner, 1969	Absent	Nektic
Acrolepis	Sepkoski, 2002	Chordata	Osteichthyes	Actinopterygii	PALAEONISCIFORMES		C	Tour	C	Tour	Nektic	Eunekton	Compressiform	0.75	Moy-Thomas & Miles, 1971	Present	Nektic
Aedulla	Sepkoski, 2002	Chordata	Osteichthyes	Actinopterygii	PALAEONISCIFORMES		P	Leon	P	Leon	Nektic	Eunekton	Compressiform	0.75	Moy-Thomas & Miles, 1971	Present	Nektic
Amblypterina	Sepkoski, 2002	Chordata	Osteichthyes	Actinopterygii	PALAEONISCIFORMES		P	Tatr	P	Tatr	Nektic	Eunekton	Compressiform	0.75	Moy-Thomas & Miles, 1971	Present	Nektic
Amblypterus	Sepkoski, 2002	Chordata	Osteichthyes	Actinopterygii	PALAEONISCIFORMES		P	Tatr	P	Tatr	Nektic	Eunekton	Compressiform	0.75	Moy-Thomas & Miles, 1971	Present	Nektic
Andreolepis	Sepkoski, 2002	Chordata	Osteichthyes	Actinopterygii	PALAEONISCIFORMES		S	Ludl-l	S	Ludl-l	Nektic	Eunekton	Compressiform	0.75	Moy-Thomas & Miles, 1971	Present	Nektic
Beagiascus	Sallan & Coates, 2010	Chordata	Osteichthyes	Actinopterygii	PALAEONISCIFORMES		C	Serp-u	C	Serp-u	Nektic	Eunekton	Compressiform, Fusiform	1	Moy-Thomas & Miles, 1971; Mickle et al., 2009	Absent	Nektic
Brachypareion	Sepkoski, 2002	Chordata	Osteichthyes	Actinopterygii	PALAEONISCIFORMES		C	Tour	C	Tour	Nektic	Eunekton	Compressiform	0.75	Moy-Thomas & Miles, 1971	Present	Nektic
Burbonella	Sepkoski, 2002	Chordata	Osteichthyes	Actinopterygii	PALAEONISCIFORMES		P	Leon	P	Leon	Nektic	Eunekton	Compressiform	0.75	Moy-Thomas & Miles, 1971	Present	Nektic
Canobius	Sallan & Coates, 2010	Chordata	Osteichthyes	Actinopterygii	PALAEONISCIFORMES		C	Vise	C	Vise	Nektic	Eunekton	Compressiform	0.75	Moy-Thomas & Miles, 1971	Absent	Nektic
Charleuxia	Sepkoski, 2002	Chordata	Osteichthyes	Actinopterygii	PALAEONISCIFORMES		P	Asse	P	Asse	Nektic	Eunekton	Compressiform	0.75	Moy-Thomas & Miles, 1971	Present	Nektic
Cheirodopsis	Sepkoski, 2002	Chordata	Osteichthyes	Actinopterygii	PALAEONISCIFORMES		C	Tour	C	Tour	Nektic	Eunekton	Compressiform	0.75	Moy-Thomas & Miles, 1971	Present	Nektic
Coccocephalichthys	Sepkoski, 2002	Chordata	Osteichthyes	Actinopterygii	PALAEONISCIFORMES		C	Serp	P	l	Nektic	Eunekton	Compressiform	0.75	Moy-Thomas & Miles, 1971	Present	Nektic
Cornuboniscus	Sepkoski, 2002	Chordata	Osteichthyes	Actinopterygii	PALAEONISCIFORMES		C	Tour	C	Tour	Nektic	Eunekton	Compressiform	0.75	Moy-Thomas & Miles, 1971	Present	Nektic
Cosmoptychius	Sepkoski, 2002	Chordata	Osteichthyes	Actinopterygii	PALAEONISCIFORMES		C	Tour	C	Tour	Nektic	Eunekton	Compressiform	0.75	Moy-Thomas & Miles, 1971	Present	Nektic
Cryphiolepis	Sallan & Coates, 2010	Chordata	Osteichthyes	Actinopterygii	PALAEONISCIFORMES		C	Serp	C	Serp	Nektic	Eunekton	Compressiform	0.75	Waterston, 1953; Moy-Thomas & Miles, 1971	Absent	Nektic
Cycloptychius	Sepkoski, 2002	Chordata	Osteichthyes	Actinopterygii	PALAEONISCIFORMES		C	Tour	C	u	Nektic	Eunekton	Compressiform	0.75	Moy-Thomas & Miles, 1971	Present	Nektic
Cyranorhis	Sepkoski, 2002	Chordata	Osteichthyes	Actinopterygii	PALAEONISCIFORMES		C	Serp-l	C	Serp-l	Nektic	Eunekton	Fusiform, Compressed	1	Moy-Thomas & Miles, 1971; Lund & Poplin, 1997	Present	Nektic
Decazella	Sepkoski, 2002	Chordata	Osteichthyes	Actinopterygii	PALAEONISCIFORMES		P	Leon	P	Leon	Nektic	Eunekton	Compressiform	0.75	Moy-Thomas & Miles, 1971	Present	Nektic
Drydenius	Sepkoski, 2002	Chordata	Osteichthyes	Actinopterygii	PALAEONISCIFORMES		C	Tour	C	Tour	Nektic	Eunekton	Compressiform	0.75	Moy-Thomas & Miles, 1971	Present	Nektic
Dwykia	Sepkoski, 2002	Chordata	Osteichthyes	Actinopterygii	PALAEONISCIFORMES		C	Vise	C	Vise	Nektic	Eunekton	Compressiform	0.75	Moy-Thomas & Miles, 1971	Present	Nektic
Elonichthys	Sepkoski, 2002	Chordata	Osteichthyes	Actinopterygii	PALAEONISCIFORMES		C	Tour	C	Tour	Nektic	Eunekton	Compressiform	0.75	Moy-Thomas & Miles, 1971	Present	Nektic
Eurynotoides	Sepkoski, 2002	Chordata	Osteichthyes	Actinopterygii	PALAEONISCIFORMES		P	Tatr	P	Tatr	Nektic	Eunekton	Compressiform	0.75	Moy-Thomas & Miles, 1971	Present	Nektic
Eurynotus	Sallan & Coates, 2010	Chordata	Osteichthyes	Actinopterygii	PALAEONISCIFORMES		C	Vise	C	Serp	Nektic	Eunekton	Compressiform	0.75	Waterston, 1953; Moy-Thomas & Miles, 1971	Absent	Nektic
Ganolepis	Sallan & Coates, 2010	Chordata	Osteichthyes	Actinopterygii	PALAEONISCIFORMES		C	Tour	C	Tour	Nektic	Eunekton	Fusiform, Compressiform	1	Woodward, 1893	Absent	Nektic
Gardinerichthys	Sepkoski, 2002	Chordata	Osteichthyes	Actinopterygii	PALAEONISCIFORMES		P	Tatr	P	Tatr	Nektic	Eunekton	Compressiform	0.75	Moy-Thomas & Miles, 1971	Present	Nektic
Gonatodus	Sepkoski, 2002	Chordata	Osteichthyes	Actinopterygii	PALAEONISCIFORMES		C	Tour	C	Tour	Nektic	Eunekton	Compressiform	0.75	Moy-Thomas & Miles, 1971	Present	Nektic
Gyrolepidotus	Sallan & Coates, 2010	Chordata	Osteichthyes	Actinopterygii	PALAEONISCIFORMES		C	Tour	C	Tour	Nektic	Eunekton	Compressed	0.75	Yakovlev, 1967; Moy-Thomas & Miles, 1971	Absent	Nektic
Haplolepis	Sepkoski, 2002	Chordata	Osteichthyes	Actinopterygii	PALAEONISCIFORMES		C	Mosc-u	C	Mosc-u	Nektic	Eunekton	Compressiform	0.75	Moy-Thomas & Miles, 1971	Present	Nektic
Holurus	Sallan & Coates, 2010	Chordata	Osteichthyes	Actinopterygii	PALAEONISCIFORMES		C	Vise	C	Vise	Nektic	Eunekton	Compressiform	0.75	Waterston, 1953; Moy-Thomas & Miles, 1971	Absent	Nektic
Igornella	Sepkoski, 2002	Chordata	Osteichthyes	Actinopterygii	PALAEONISCIFORMES		P	Leon	P	Leon	Nektic	Eunekton	Compressiform	0.75	Moy-Thomas & Miles, 1971	Present	Nektic
Illiniichthys	Sepkoski, 2002	Chordata	Osteichthyes	Actinopterygii	PALAEONISCIFORMES		C	Mosc-u	C	Mosc-u	Nektic	Eunekton	Compressiform	0.75	Moy-Thomas & Miles, 1971	Present	Nektic
Kalops	Sallan & Coates, 2010	Chordata	Osteichthyes	Actinopterygii	PALAEONISCIFORMES		C	Serp-u	C	Serp-u	Nektic	Eunekton	Fusiform, Compressed	1	Poplin & Lund, 2002	Absent	Nektic
Kentuckia	Sallan & Coates, 2010	Chordata	Osteichthyes	Actinopterygii	PALAEONISCIFORMES		D	Fame-u	D	Fame-u	Nektic	Eunekton	Somewhat Compressed	0.75	Rayner, 1951; Moy-Thomas & Miles, 1971	Absent	Nektic
Korutichthys	Sepkoski, 2002	Chordata	Osteichthyes	Actinopterygii	PALAEONISCIFORMES		P	Tatr	P	Tatr	Nektic	Eunekton	Compressiform	0.75	Moy-Thomas & Miles, 1971	Present	Nektic
Ligulalepis	Sepkoski, 2002	Chordata	Osteichthyes	Actinopterygii	PALAEONISCIFORMES		S	Ludl	D	l	Nektic	Eunekton	Compressiform	0.75	Moy-Thomas & Miles, 1971	Present	Nektic
Lineagruan	Sallan & Coates, 2010	Chordata	Osteichthyes	Actinopterygii	PALAEONISCIFORMES		C	Serp-u	C	Serp-u	Nektic	Eunekton	Compressiform, Fusiform, Deep-Bodied	1	Moy-Thomas & Miles, 1971; Mickle et al., 2009	Absent	Nektic
Mesolepis	Sepkoski, 2002	Chordata	Osteichthyes	Actinopterygii	PALAEONISCIFORMES		C	Tour	C	Tour	Nektic	Eunekton	Compressiform	0.75	Moy-Thomas & Miles, 1971	Present	Nektic
Mesopoma	Sallan & Coates, 2010	Chordata	Osteichthyes	Actinopterygii	PALAEONISCIFORMES		C	Vise	C	Serp-l	Nektic	Eunekton	Compressed	1	Moy-Thomas, 1938; Waterston, 1953; Moy-Thomas & Miles, 1971	Absent	Nektic
Mimia	Sepkoski, 2002	Chordata	Osteichthyes	Actinopterygii	PALAEONISCIFORMES		D	Fras	D	Fras	Nektic	Eunekton	Compressiform	0.75	Moy-Thomas & Miles, 1971	Present	Nektic
Moythomasia	Sepkoski, 2002	Chordata	Osteichthyes	Actinopterygii	PALAEONISCIFORMES		D	Eife	D	Fame	Nektic	Eunekton	Compressiform	0.75	Moy-Thomas & Miles, 1971	Present	Nektic
Naxilepis	Sepkoski, 2002	Chordata	Osteichthyes	Actinopterygii	PALAEONISCIFORMES		S	Ludl	S	Ludl	Nektic	Eunekton	Compressiform	0.75	Moy-Thomas & Miles, 1971	Present	Nektic
Nematoptychius	Sepkoski, 2002	Chordata	Osteichthyes	Actinopterygii	PALAEONISCIFORMES		C	Tour	C	Tour	Nektic	Eunekton	Compressiform	0.75	Moy-Thomas & Miles, 1971	Present	Nektic
Novogonatodus	Sallan & Coates, 2010	Chordata	Osteichthyes	Actinopterygii	PALAEONISCIFORMES		C	Tour	C	Tour	Nektic	Eunekton	Compressed	1	Moy-Thomas & Miles, 1971; Holland et al., 2004	Absent	Nektic
Nozamichthys	Sepkoski, 2002	Chordata	Osteichthyes	Actinopterygii	PALAEONISCIFORMES		C	Mosc-u	C	Mosc-u	Nektic	Eunekton	Compressiform	0.75	Moy-Thomas & Miles, 1971	Present	Nektic
Orvikuina	Sepkoski, 2002	Chordata	Osteichthyes	Actinopterygii	PALAEONISCIFORMES		D	Eife	D	Give	Nektic	Eunekton	Compressiform	0.75	Moy-Thomas & Miles, 1971	Present	Nektic
Osorioichthys	Sallan & Coates, 2010	Chordata	Osteichthyes	Actinopterygii	PALAEONISCIFORMES		D	Fame-u	D	Fame-u	Nektic	Eunekton	Compressed	1	Moy-Thomas & Miles, 1971; Taverne, 1997	Absent	Nektic
Oxypteriscus	Sallan & Coates, 2010	Chordata	Osteichthyes	Actinopterygii	PALAEONISCIFORMES		C	Tour	C	Tour	Nektic	Eunekton	Compressiform	0.75	Moy-Thomas & Miles, 1971	Absent	Nektic
Palaeoniscum	Sepkoski, 2002	Chordata	Osteichthyes	Actinopterygii	PALAEONISCIFORMES		P	Guad	P	Guad	Nektic	Eunekton	Compressiform	0.75	Moy-Thomas & Miles, 1971	Present	Nektic
Paradrydenius	Sepkoski, 2002	Chordata	Osteichthyes	Actinopterygii	PALAEONISCIFORMES		C	Tour	C	Tour	Nektic	Eunekton	Compressiform	0.75	Moy-Thomas & Miles, 1971	Present	Nektic
Paragonatodus	Sepkoski, 2002	Chordata	Osteichthyes	Actinopterygii	PALAEONISCIFORMES		C	Tour	C	Tour	Nektic	Eunekton	Compressiform	0.75	Moy-Thomas & Miles, 1971	Present	Nektic
Paramblypterus	Sepkoski, 2002	Chordata	Osteichthyes	Actinopterygii	PALAEONISCIFORMES		C	Bash	C	Bash	Nektic	Eunekton	Compressiform	0.75	Moy-Thomas & Miles, 1971	Present	Nektic
Paramesolepis	Sepkoski, 2002	Chordata	Osteichthyes	Actinopterygii	PALAEONISCIFORMES		C	Tour	C	Tour	Nektic	Eunekton	Compressiform	0.75	Moy-Thomas & +A1655+P1664	Present	Nektic
Platysomus	Sepkoski, 2002	Chordata	Osteichthyes	Actinopterygii	PALAEONISCIFORMES		C	Tour	C	Tour	Nektic	Eunekton	Compressiform	0.75	Moy-Thomas & Miles, 1971	Present	Nektic
Protamblyptera	Sepkoski, 2002	Chordata	Osteichthyes	Actinopterygii	PALAEONISCIFORMES		C	Tour	C	Tour	Nektic	Eunekton	Compressiform	0.75	Moy-Thomas & Miles, 1971	Present	Nektic
Protoeurynotus	Sallan & Coates, 2010	Chordata	Osteichthyes	Actinopterygii	PALAEONISCIFORMES		C	Vise	C	Vise	Nektic	Eunekton	Compressiform	0.75	Waterston, 1953; Moy-Thomas & Miles, 1971	Absent	Nektic
Pseudogonatodus	Sallan & Coates, 2010	Chordata	Osteichthyes	Actinopterygii	PALAEONISCIFORMES		C	Vise-u	C	Serp-u	Nektic	Eunekton	Compressed	0.75	Moy-Thomas & Miles, 1971; Smithson, 1985	Absent	Nektic
Rhadinichthys	Sepkoski, 2002	Chordata	Osteichthyes	Actinopterygii	PALAEONISCIFORMES		C	Tour	C	u	Nektic	Eunekton	Compressiform	0.75	Moy-Thomas & Miles, 1971	Present	Nektic
Rhadinoniscus	Sallan & Coates, 2010	Chordata	Osteichthyes	Actinopterygii	PALAEONISCIFORMES		C	Vise-u	C	Vise-u	Nektic	Eunekton	Compressiform, Fusiform	1	White, 1937; Moy-Thomas & Miles, 1971	Absent	Nektic
Senekichthys	Sallan & Coates, 2010	Chordata	Osteichthyes	Actinopterygii	PALAEONISCIFORMES		C	Tour	C	Tour	Nektic	Eunekton	Fusiform, Compressed	1	Moy-Thomas & Miles, 1971; Prokofiev, 2004	Absent	Nektic
Stegotrachelus	Sepkoski, 2002	Chordata	Osteichthyes	Actinopterygii	PALAEONISCIFORMES		D	Eife	D	Eife	Nektic	Eunekton	Compressiform	0.75	Moy-Thomas & Miles, 1971	Present	Nektic
Styracopterus	Sepkoski, 2002	Chordata	Osteichthyes	Actinopterygii	PALAEONISCIFORMES		C	Tour	C	Tour	Nektic	Eunekton	Compressiform	0.75	Moy-Thomas & Miles, 1971	Present	Nektic
Tegeolepis	Sepkoski, 2002	Chordata	Osteichthyes	Actinopterygii	PALAEONISCIFORMES		D	Fame-u	D	Fame-u	Nektic	Eunekton	Compressiform	0.75	Moy-Thomas & Miles, 1971	Present	Nektic
Urosthenes	Sepkoski, 2002	Chordata	Osteichthyes	Actinopterygii	PALAEONISCIFORMES		P	Tatr	Tr	Ladi	Nektic	Eunekton	Compressiform	0.75	Moy-Thomas & Miles, 1971	Present	Nektic
Wardichthys	Sepkoski, 2002	Chordata	Osteichthyes	Actinopterygii	PALAEONISCIFORMES		C	Tour	C	Tour	Nektic	Eunekton	Compressiform	0.75	Moy-Thomas & Miles, 1971	Present	Nektic
Watsonichthyes	Sepkoski, 2002	Chordata	Osteichthyes	Actinopterygii	PALAEONISCIFORMES		C	Tour	C	Tour	Nektic	Eunekton	Compressiform	0.75	Moy-Thomas & Miles, 1971	Present	Nektic
Wendyichths	Sepkoski, 2002	Chordata	Osteichthyes	Actinopterygii	PALAEONISCIFORMES		C	Serp-l	C	Serp-l	Nektic	Eunekton	Compressiform	0.75	Moy-Thomas & Miles, 1971	Present	Nektic
Westollia	Sepkoski, 2002	Chordata	Osteichthyes	Actinopterygii	PALAEONISCIFORMES		P	Leon	P	Leon	Nektic	Eunekton	Compressiform	0.75	Moy-Thomas & Miles, 1971	Present	Nektic
Whiteichthys	Sepkoski, 2002	Chordata	Osteichthyes	Actinopterygii	PALAEONISCIFORMES		C	Tour	C	Tour	Nektic	Eunekton	Compressiform	0.75	Moy-Thomas & Miles, 1971	Present	Nektic
Willomorichthys	Sepkoski, 2002	Chordata	Osteichthyes	Actinopterygii	PALAEONISCIFORMES		C	Vise	C	Vise	Nektic	Eunekton	Fusiform, Compressed, Deep-Bodied	1	Gardiner, 1969	Present	Nektic
Acentrophorus	Sepkoski, 2002	Chordata	Osteichthyes	Actinopterygii	SEMIONOTIFORMES		P	Djhu	P	Djhu	Nektic	Eunekton	Generally Compressed	0.75	Moy-Thomas & Miles, 1971	Present	Nektic
Paralepidotus	Sepkoski, 2002	Chordata	Osteichthyes	Actinopterygii	SEMIONOTIFORMES		P	Tatr	Tr	Rhae	Nektic	Eunekton	Generally Compressed	0.75	Moy-Thomas & Miles, 1971	Present	Nektic
Holopterygius	Sepkoski, 2002	Chordata	Osteichthyes	Actinopterygii	TARRASIIFORMES		D	Fras	D	Fras	Demersal	Nektobenthos	Anguilliform	0.75	Lund & Poplin, 2002; Friedman & Coates, 2006	Present	Nektic
Palaeophichthys	Sepkoski, 2002	Chordata	Osteichthyes	Actinopterygii	TARRASIIFORMES		C	Mosc-u	C	Mosc-u	Demersal	Nektobenthos	Anguilliform	0.75	Moy-Thomas & Miles, 1971; Lund & Poplin, 2002	Present	Nektic
Paratarrasius	Sepkoski, 2002	Chordata	Osteichthyes	Actinopterygii	TARRASIIFORMES		C	Serp-l	C	Serp-l	Demersal	Nektobenthos	Anguilliform	1	Lund & William, 1982; Lund & Poplin, 2002	Present	Nektic
Tarrasius	Sepkoski, 2002	Chordata	Osteichthyes	Actinopterygii	TARRASIIFORMES		C	Vise	C	Vise	Demersal	Nektobenthos	Anguilliform	1	Moy-Thomas & Miles, 1971; Lund & Poplin, 2002	Present	Nektic
Donnrosenia	Sallan & Coates, 2010	Chordata	Osteichthyes	Actinopterygii		Howqualepididae	D	Give	D	Give	Nektic	Eunekton	Fusiform	1	Long et al, 2008	Absent	Nektic
Wendichthys	Sallan & Coates, 2010	Chordata	Osteichthyes	Actinopterygii		Rhadinichthyidae	C	Serp-u	C	Serp-u	Nektic	Eunekton	Fusiform, Compressed	1	Lund & Poplin, 1997	Absent	Nektic
Aetheretmon	Sallan & Coates, 2010	Chordata	Osteichthyes	Actinopterygii			C	Tour	C	Tour	Nektic	Eunekton	Fusiform	1	Sallan & Coates, 2013	Absent	Nektic
Bishofia	Sallan & Coates, 2010	Chordata	Osteichthyes	Actinopterygii			C	Tour	C	Tour	Nektic	Eunekton	Most Early Actinopterygians Compressed	0.25	Moy-Thomas & Miles, 1971	Absent	Nektic
Chirodus	Sallan & Coates, 2010	Chordata	Osteichthyes	Actinopterygii			C	Vise-u	C	Serp-l	Nektic	Eunekton	Deep-Bodied	1	Schultze & Bardack, 1987	Absent	Nektic
Frederichthys	Sallan & Coates, 2010	Chordata	Osteichthyes	Actinopterygii			C	Serp-l	C	Serp-l	Nektic	Eunekton	Most Early Actinopterygians Compressed	0.25	Moy-Thomas & Miles, 1971	Absent	Nektic
Gogosardinus	Sallan & Coates, 2010	Chordata	Osteichthyes	Actinopterygii			D	Fras-l	D	Fras-l	Nektic	Eunekton	Fusiform, Compressiform	1	Choo et al., 2009	Absent	Nektic
Grassator	Sallan & Coates, 2010	Chordata	Osteichthyes	Actinopterygii			C	Tour	C	Tour	Nektic	Eunekton	Most Early Actinopterygians Compressed	0.25	Moy-Thomas & Miles, 1971	Absent	Nektic
Howqualepis	Sallan & Coates, 2010	Chordata	Osteichthyes	Actinopterygii			D	Give-u	D	Give-u	Nektic	Eunekton	Compressed	0.75	Long, 1988; Basden & Young, 2001	Absent	Nektic
Limnomis	Sallan & Coates, 2010	Chordata	Osteichthyes	Actinopterygii			D	Fame-u	D	Fame-u	Nektic	Eunekton	Fusiform	0.75	Daeschler, 2000	Absent	Nektic
Mansfieldiscus	Sallan & Coates, 2010	Chordata	Osteichthyes	Actinopterygii			C	Tour	C	Tour	Nektic	Eunekton	Most Early Actinopterygians Compressed	0.25	Moy-Thomas & Miles, 1971	Absent	Nektic
Melanecta	Sallan & Coates, 2010	Chordata	Osteichthyes	Actinopterygii			C	Serp-l	C	Serp-l	Nektic	Eunekton	Fusiform, Compressed	1	Coates, 1998	Absent	Nektic
Mesonichthys	Sallan & Coates, 2010	Chordata	Osteichthyes	Actinopterygii			C	Serp-l	C	Serp-l	Nektic	Eunekton	Most Early Actinopterygians Compressed	0.25	Moy-Thomas & Miles, 1971	Absent	Nektic
Ministrella	Sallan & Coates, 2010	Chordata	Osteichthyes	Actinopterygii			C	Tour	C	Tour	Nektic	Eunekton	Most Early Actinopterygians Compressed	0.25	Moy-Thomas & Miles, 1971	Absent	Nektic
Palaeobergia	Sallan & Coates, 2010	Chordata	Osteichthyes	Actinopterygii			C	Tour	C	Tour	Nektic	Eunekton	Most Early Actinopterygians Compressed	0.25	Moy-Thomas & Miles, 1971	Absent	Nektic
Phanerosteon	Sallan & Coates, 2010	Chordata	Osteichthyes	Actinopterygii			C	Tour	C	Serp-u	Nektic	Eunekton	Fusiform	1	Sallan & Coates, 2013	Absent	Nektic
Strepheoschema	Sallan & Coates, 2010	Chordata	Osteichthyes	Actinopterygii			C	Tour	C	Tour	Nektic	Eunekton	Fusiform	1	Sallan & Coates, 2013	Absent	Nektic
Woodichthys	Sallan & Coates, 2010	Chordata	Osteichthyes	Actinopterygii			C	Serp-l	C	Serp-l	Nektic	Eunekton	Fusiform, Compressed	1	Coates, 1998	Absent	Nektic
Powichthys	Sepkoski, 2002	Chordata	Osteichthyes	Sarcopterygii	COELOCANTHIFORMES	Dipteriformes	D	Gedi-u	D	Gedi-u	Demersal	Nektobenthos	Durophagus, Stout, Blunt Snout, Elongate Pectoral Fins, Extant Taxa	0.75	Moy-Thomas & Miles, 1971; Aleyev, 1977; Janvier, 1996	Present	Nektic
Youngolepis	Sepkoski, 2002	Chordata	Osteichthyes	Sarcopterygii	COELOCANTHIFORMES	Dipteriformes	D	Gedi	D	Sieg	Demersal	Nektobenthos	Durophagus, Stout, Blunt Snout, Elongate Pectoral Fins, Extant Taxa	0.75	Moy-Thomas & Miles, 1971; Aleyev, 1977; Janvier, 1996	Present	Nektic
Panderichthys	Sepkoski, 2002	Chordata	Osteichthyes	Sarcopterygii	COELOCANTHIFORMES	Eotetrapodiformes	D	Give	D	Fame	Demersal	Nektobenthos	Depressed, Muscular Limbs, Dorsal Orbits, Extant Taxa	0.5	Janvier, 1996; Johanson & Ahlberg, 1998	Present	Nektic
Onychodus	Sepkoski, 2002	Chordata	Osteichthyes	Sarcopterygii	COELOCANTHIFORMES	Onychodontida	D	Emsi	D	Fame	Nektic	Eunekton	Fusiform, Stem Actinistian	0.75	Lu et al., 2016	Present	Nektic
Strunius	Sepkoski, 2002	Chordata	Osteichthyes	Sarcopterygii	COELOCANTHIFORMES	Onychodontida	D	m	D	u	Nektic	Eunekton	Fusiform, Stem Actinistian	0.75	Lu et al., 2016	Present	Nektic
Cryptolepis	Sepkoski, 2002	Chordata	Osteichthyes	Sarcopterygii	COELOCANTHIFORMES	Osteolepididae	D	Fame-u	D	Fame-u	Demersal	Nektobenthos	Depressed Wide Skull, Large Fan-Shaped Pectoral Fins	0.75	Witzmann & Schoch, 2012	Present	Nektic
Glyptopomus	Sepkoski, 2002	Chordata	Osteichthyes	Sarcopterygii	COELOCANTHIFORMES	Osteolepididae	D	Fame	D	Fame	Demersal	Nektobenthos	Depressed Wide Skull, Large Fan-Shaped Pectoral Fins	0.75	Witzmann & Schoch, 2012	Present	Nektic
Gyroptychius	Sepkoski, 2002	Chordata	Osteichthyes	Sarcopterygii	COELOCANTHIFORMES	Osteolepididae	D	Eife-l	D	Give	Demersal	Nektobenthos	Depressed Wide Skull, Large Fan-Shaped Pectoral Fins	0.75	Witzmann & Schoch, 2012	Present	Nektic
Osteolepis	Sepkoski, 2002	Chordata	Osteichthyes	Sarcopterygii	COELOCANTHIFORMES	Osteolepididae	D	Eife-u	D	Fras-m	Demersal	Nektobenthos	Depressed Wide Skull, Large Fan-Shaped Pectoral Fins	0.75	Witzmann & Schoch, 2012	Present	Nektic
Thursius	Sepkoski, 2002	Chordata	Osteichthyes	Sarcopterygii	COELOCANTHIFORMES	Osteolepididae	D	Eife-l	D	Give-l	Demersal	Nektobenthos	Depressed Wide Skull, Large Fan-Shaped Pectoral Fins	0.75	Witzmann & Schoch, 2012	Present	Nektic
Glyptolepis	Sepkoski, 2002	Chordata	Osteichthyes	Sarcopterygii	COELOCANTHIFORMES	Porolepiformes	D	Eife	D	Fras-m	Demersal	Eudemersus	Muscular Lobe Fins, Broad Head, Somewhat Depressed	0.75	Downs et al., 2011	Present	Nektic
Holoptychus	Sepkoski, 2002	Chordata	Osteichthyes	Sarcopterygii	COELOCANTHIFORMES	Porolepiformes	D	Give-u	D	Fame-u	Demersal	Eudemersus	Muscular Lobe Fins, Broad Head, Somewhat Depressed	0.75	Downs et al., 2011	Present	Nektic
Porolepis	Sepkoski, 2002	Chordata	Osteichthyes	Sarcopterygii	COELOCANTHIFORMES	Porolepiformes	D	Sieg-u	D	Give	Demersal	Eudemersus	Muscular Lobe Fins, Broad Head, Somewhat Depressed	0.75	Downs et al., 2011	Present	Nektic
Rhizodus	Sepkoski, 2002	Chordata	Osteichthyes	Sarcopterygii	COELOCANTHIFORMES	Rhizodontida	C	Ms	C	Bash-u	Demersal	Nektobenthos	Muscular Lobe Fins, Depressed, Broad Head, Dorsal Orbits	0.75	Johanson & Ahlberg, 1998	Present	Nektic
Eusthenopteron	Sepkoski, 2002	Chordata	Osteichthyes	Sarcopterygii	COELOCANTHIFORMES	Tristichopteridae	D	Give-u	D	Fras	Demersal	Eudemersus	Somewhat Compressed, Poorly Developed Muscular Lobe Fins, Somewhat Elongate, Somewhat Laterally-Broad Skull	0.75	Andrews & Westoll, 1969; Personal Observations (YPM VP 49999, YPM VP 7545, YPM VP 5001)	Present	Nektic
Allenypterus	Sepkoski, 2002	Chordata	Osteichthyes	Sarcopterygii	COELOCANTHIFORMES		C	Serp-l	C	Serp-l	Nektic	Eunekton	Strongly Compressed, Dacriform	1	Lund & Lund, 1984	Present	Nektic
Callistiopterus	Sallan & Coates, 2010	Chordata	Osteichthyes	Sarcopterygii	COELOCANTHIFORMES		D	Fras-l	D	Fras-l	Nektic	Eunekton	Fusiform, Generally Compressed, Highly Conserved Morphology in Extant Taxa	0.75	Moy-Thomas & Miles, 1971	Absent	Nektic
Caridosuctor	Sepkoski, 2002	Chordata	Osteichthyes	Sarcopterygii	COELOCANTHIFORMES		C	Serp-l	C	Serp-l	Nektic	Eunekton	Fusiform, Generally Compressed, Highly Conserved Morphology in Extant Taxa	0.75	Moy-Thomas & Miles, 1971	Present	Nektic
Chagrinia	Sepkoski, 2002	Chordata	Osteichthyes	Sarcopterygii	COELOCANTHIFORMES		D	Fame-u	D	Fame-u	Nektic	Eunekton	Fusiform, Generally Compressed, Highly Conserved Morphology in Extant Taxa	0.75	Moy-Thomas & Miles, 1971	Present	Nektic
Changxingia	Sepkoski, 2002	Chordata	Osteichthyes	Sarcopterygii	COELOCANTHIFORMES		P	Tatr	P	Tatr	Nektic	Eunekton	Fusiform, Generally Compressed, Highly Conserved Morphology in Extant Taxa	0.75	Moy-Thomas & Miles, 1971	Present	Nektic
Chrysolepis	Sepkoski, 2002	Chordata	Osteichthyes	Sarcopterygii	COELOCANTHIFORMES		D	Fame	D	Fame	Nektic	Eunekton	Fusiform, Generally Compressed, Highly Conserved Morphology in Extant Taxa	0.75	Moy-Thomas & Miles, 1971	Present	Nektic
Coelacanthopsis	Sepkoski, 2002	Chordata	Osteichthyes	Sarcopterygii	COELOCANTHIFORMES		C	Vise-u	C	Vise-u	Nektic	Eunekton	Fusiform, Generally Compressed, Highly Conserved Morphology in Extant Taxa	0.75	Moy-Thomas & Miles, 1971	Present	Nektic
Coelocanthus	Sepkoski, 2002	Chordata	Osteichthyes	Sarcopterygii	COELOCANTHIFORMES		P	Guad-l	P	Guad-l	Nektic	Eunekton	Fusiform, Generally Compressed, Highly Conserved Morphology in Extant Taxa	0.75	Moy-Thomas & Miles, 1971	Present	Nektic
Devonosteus	Sepkoski, 2002	Chordata	Osteichthyes	Sarcopterygii	COELOCANTHIFORMES		D	m	D	u	Nektic	Eunekton	Fusiform, Generally Compressed, Highly Conserved Morphology in Extant Taxa	0.75	Moy-Thomas & Miles, 1971	Present	Nektic
Diplocercides	Sepkoski, 2002	Chordata	Osteichthyes	Sarcopterygii	COELOCANTHIFORMES		D	Fras-m	C	Vise-u	Nektic	Eunekton	Fusiform, Generally Compressed, Highly Conserved Morphology in Extant Taxa	0.75	Moy-Thomas & Miles, 1971	Present	Nektic
Dumfregia	Sallan & Coates, 2010	Chordata	Osteichthyes	Sarcopterygii	COELOCANTHIFORMES		C	Vise	C	Vise	Nektic	Eunekton	Fusiform, Generally Compressed, Highly Conserved Morphology in Extant Taxa	0.75	Moy-Thomas & Miles, 1971	Absent	Nektic
Ectosteorhachis	Sepkoski, 2002	Chordata	Osteichthyes	Sarcopterygii	COELOCANTHIFORMES		P	Asse	P	Asse	Nektic	Eunekton	Fusiform, Generally Compressed, Highly Conserved Morphology in Extant Taxa	0.75	Moy-Thomas & Miles, 1971	Present	Nektic
Euporosteus	Sepkoski, 2002	Chordata	Osteichthyes	Sarcopterygii	COELOCANTHIFORMES		D	Give	D	Fras	Nektic	Eunekton	Fusiform, Generally Compressed, Highly Conserved Morphology in Extant Taxa	0.75	Moy-Thomas & Miles, 1971	Present	Nektic
Gavinia	Sallan & Coates, 2010	Chordata	Osteichthyes	Sarcopterygii	COELOCANTHIFORMES		D	Give-u	D	Give-u	Nektic	Eunekton	Fusiform, Generally Compressed, Highly Conserved Morphology in Extant Taxa	0.75	Moy-Thomas & Miles, 1971	Absent	Nektic
Hadronector	Sepkoski, 2002	Chordata	Osteichthyes	Sarcopterygii	COELOCANTHIFORMES		C	Serp-l	C	Serp-l	Nektic	Eunekton	Fusiform, Generally Compressed, Highly Conserved Morphology in Extant Taxa	0.75	Moy-Thomas & Miles, 1971	Present	Nektic
Latvius	Sepkoski, 2002	Chordata	Osteichthyes	Sarcopterygii	COELOCANTHIFORMES		D	Fras-l	D	Fame-u	Nektic	Eunekton	Fusiform, Generally Compressed, Highly Conserved Morphology in Extant Taxa	0.75	Moy-Thomas & Miles, 1971	Present	Nektic
Lochmocereus	Sepkoski, 2002	Chordata	Osteichthyes	Sarcopterygii	COELOCANTHIFORMES		C	Serp-l	C	Serp-l	Nektic	Eunekton	Fusiform, Generally Compressed, Highly Conserved Morphology in Extant Taxa	0.75	Moy-Thomas & Miles, 1971	Present	Nektic
Megapomus	Sepkoski, 2002	Chordata	Osteichthyes	Sarcopterygii	COELOCANTHIFORMES		D	Fame-l	D	Fame-l	Nektic	Eunekton	Fusiform, Generally Compressed, Highly Conserved Morphology in Extant Taxa	0.75	Moy-Thomas & Miles, 1971	Present	Nektic
Miguashaia	Sepkoski, 2002	Chordata	Osteichthyes	Sarcopterygii	COELOCANTHIFORMES		D	Fras-l	D	Fras-l	Nektic	Eunekton	Fusiform, Generally Compressed, Highly Conserved Morphology in Extant Taxa	0.75	Moy-Thomas & Miles, 1971	Present	Nektic
Nesides	Sepkoski, 2002	Chordata	Osteichthyes	Sarcopterygii	COELOCANTHIFORMES		D	Fras	D	Fras	Nektic	Eunekton	Fusiform, Generally Compressed, Highly Conserved Morphology in Extant Taxa	0.75	Moy-Thomas & Miles, 1971	Present	Nektic
Polyosteorhynchus	Sepkoski, 2002	Chordata	Osteichthyes	Sarcopterygii	COELOCANTHIFORMES		C	Serp-l	C	Serp-l	Nektic	Eunekton	Fusiform, Generally Compressed, Highly Conserved Morphology in Extant Taxa	0.75	Moy-Thomas & Miles, 1971	Present	Nektic
Rhabdoderma	Sepkoski, 2002	Chordata	Osteichthyes	Sarcopterygii	COELOCANTHIFORMES		C	Vise	C	Step-u	Nektic	Eunekton	Fusiform, Generally Compressed, Highly Conserved Morphology in Extant Taxa	0.75	Moy-Thomas & Miles, 1971	Present	Nektic
Synaptotylus	Sepkoski, 2002	Chordata	Osteichthyes	Sarcopterygii	COELOCANTHIFORMES		C	Step-l	C	Step-l	Nektic	Eunekton	Fusiform, Generally Compressed, Highly Conserved Morphology in Extant Taxa	0.75	Moy-Thomas & Miles, 1971	Present	Nektic
Yonngichthys	Sepkoski, 2002	Chordata	Osteichthyes	Sarcopterygii	COELOCANTHIFORMES		P	Dora	P	Dora	Nektic	Eunekton	Fusiform, Generally Compressed, Highly Conserved Morphology in Extant Taxa	0.75	Moy-Thomas & Miles, 1971	Present	Nektic
Adelargo	Sallan & Coates, 2010	Chordata	Osteichthyes	Sarcopterygii	DIPTERIFORMES		D	Fame-u	D	Fame-u	Demersal	Nektobenthos	Durophagus, Stout, Blunt Snout, Elongate Pectoral Fins, Extant Taxa	0.75	Moy-Thomas & Miles, 1971; Aleyev, 1977; Janvier, 1996	Absent	Nektic
Adolopas	Sallan & Coates, 2010	Chordata	Osteichthyes	Sarcopterygii	DIPTERIFORMES		D	Fras-l	D	Fras-l	Demersal	Nektobenthos	Durophagus, Stout, Blunt Snout, Elongate Pectoral Fins, Extant Taxa	0.75	Moy-Thomas & Miles, 1971; Aleyev, 1977; Janvier, 1996	Absent	Nektic
Andreyevichthys	Sallan & Coates, 2010	Chordata	Osteichthyes	Sarcopterygii	DIPTERIFORMES		D	Fame-u	D	Fame-u	Demersal	Nektobenthos	Durophagus, Stout, Blunt Snout, Elongate Pectoral Fins, Extant Taxa	0.75	Moy-Thomas & Miles, 1971; Aleyev, 1977; Janvier, 1996	Absent	Nektic
Archaeonectus	Sallan & Coates, 2010	Chordata	Osteichthyes	Sarcopterygii	DIPTERIFORMES		D	Give-l	D	Give-l	Demersal	Nektobenthos	Durophagus, Stout, Blunt Snout, Elongate Pectoral Fins, Extant Taxa	0.75	Moy-Thomas & Miles, 1971; Aleyev, 1977; Janvier, 1996	Absent	Nektic
Barwickia	Sallan & Coates, 2010	Chordata	Osteichthyes	Sarcopterygii	DIPTERIFORMES		D	Give-u	D	Give-u	Demersal	Nektobenthos	Durophagus, Stout, Blunt Snout, Elongate Pectoral Fins, Extant Taxa	0.75	Moy-Thomas & Miles, 1971; Aleyev, 1977; Janvier, 1996	Absent	Nektic
Chirodipterus	Sepkoski, 2002	Chordata	Osteichthyes	Sarcopterygii	DIPTERIFORMES		D	Fras-l	D	Fras-l	Demersal	Nektobenthos	Durophagus, Stout, Blunt Snout, Elongate Pectoral Fins, Extant Taxa	0.75	Moy-Thomas & Miles, 1971; Aleyev, 1977; Janvier, 1996	Present	Nektic
Conchodus	Sepkoski, 2002	Chordata	Osteichthyes	Sarcopterygii	DIPTERIFORMES		D	Give-u	D	Fame	Demersal	Nektobenthos	Durophagus, Stout, Blunt Snout, Elongate Pectoral Fins, Extant Taxa	0.75	Moy-Thomas & Miles, 1971; Aleyev, 1977; Janvier, 1996	Present	Nektic
Ctenodus	Sallan & Coates, 2010	Chordata	Osteichthyes	Sarcopterygii	DIPTERIFORMES		C	Vise	C	Serp	Demersal	Nektobenthos	Durophagus, Stout, Blunt Snout, Elongate Pectoral Fins, Extant Taxa	0.75	Moy-Thomas & Miles, 1971; Aleyev, 1977; Janvier, 1996	Absent	Nektic
Delatitia	Sallan & Coates, 2010	Chordata	Osteichthyes	Sarcopterygii	DIPTERIFORMES		C	Tour	C	Tour	Demersal	Nektobenthos	Durophagus, Stout, Blunt Snout, Elongate Pectoral Fins, Extant Taxa	0.75	Moy-Thomas & Miles, 1971; Aleyev, 1977; Janvier, 1996	Absent	Nektic
Diabolepis	Sepkoski, 2002	Chordata	Osteichthyes	Sarcopterygii	DIPTERIFORMES		D	Gedi	D	Gedi	Demersal	Nektobenthos	Durophagus, Stout, Blunt Snout, Elongate Pectoral Fins, Extant Taxa	0.75	Moy-Thomas & Miles, 1971; Aleyev, 1977; Janvier, 1996	Present	Nektic
Dipnorhynchus	Sepkoski, 2002	Chordata	Osteichthyes	Sarcopterygii	DIPTERIFORMES		D	Emsi-l	D	Eife	Demersal	Nektobenthos	Durophagus, Stout, Blunt Snout, Elongate Pectoral Fins, Extant Taxa	0.75	Moy-Thomas & Miles, 1971; Aleyev, 1977; Janvier, 1996	Present	Nektic
Dipterus	Sepkoski, 2002	Chordata	Osteichthyes	Sarcopterygii	DIPTERIFORMES		D	Sieg	D	Fame	Demersal	Nektobenthos	Durophagus, Stout, Blunt Snout, Elongate Pectoral Fins, Extant Taxa	0.75	Moy-Thomas & Miles, 1971; Aleyev, 1977; Janvier, 1996	Present	Nektic
Eoctenodus	Sallan & Coates, 2010	Chordata	Osteichthyes	Sarcopterygii	DIPTERIFORMES		D	Give	D	Give	Demersal	Nektobenthos	Durophagus, Stout, Blunt Snout, Elongate Pectoral Fins, Extant Taxa	0.75	Moy-Thomas & Miles, 1971; Aleyev, 1977; Janvier, 1996	Absent	Nektic
Fleurantia	Sallan & Coates, 2010	Chordata	Osteichthyes	Sarcopterygii	DIPTERIFORMES		D	Fras-l	D	Fras-l	Demersal	Nektobenthos	Durophagus, Stout, Blunt Snout, Elongate Pectoral Fins, Extant Taxa	0.75	Moy-Thomas & Miles, 1971; Aleyev, 1977; Janvier, 1996	Absent	Nektic
Ganorhynchus	Sepkoski, 2002	Chordata	Osteichthyes	Sarcopterygii	DIPTERIFORMES		D	Give	D	Fame-u	Demersal	Nektobenthos	Durophagus, Stout, Blunt Snout, Elongate Pectoral Fins, Extant Taxa	0.75	Moy-Thomas & Miles, 1971; Aleyev, 1977; Janvier, 1996	Present	Nektic
Gogodipterus	Sallan & Coates, 2010	Chordata	Osteichthyes	Sarcopterygii	DIPTERIFORMES		D	Fras-l	D	Fras-l	Demersal	Nektobenthos	Durophagus, Stout, Blunt Snout, Elongate Pectoral Fins, Extant Taxa	0.75	Moy-Thomas & Miles, 1971; Aleyev, 1977; Janvier, 1996	Absent	Nektic
Grenfellia	Sallan & Coates, 2010	Chordata	Osteichthyes	Sarcopterygii	DIPTERIFORMES		D	Fame-u	D	Fame-u	Demersal	Nektobenthos	Durophagus, Stout, Blunt Snout, Elongate Pectoral Fins, Extant Taxa	0.75	Moy-Thomas & Miles, 1971; Aleyev, 1977; Janvier, 1996	Absent	Nektic
Griphognathus	Sepkoski, 2002	Chordata	Osteichthyes	Sarcopterygii	DIPTERIFORMES		D	Fras	D	Fras	Demersal	Nektobenthos	Durophagus, Stout, Blunt Snout, Elongate Pectoral Fins, Extant Taxa	0.75	Moy-Thomas & Miles, 1971; Aleyev, 1977; Janvier, 1996	Present	Nektic
Grossipterus	Sallan & Coates, 2010	Chordata	Osteichthyes	Sarcopterygii	DIPTERIFORMES		D	Give-u	D	Give-u	Demersal	Nektobenthos	Durophagus, Stout, Blunt Snout, Elongate Pectoral Fins, Extant Taxa	0.75	Moy-Thomas & Miles, 1971; Aleyev, 1977; Janvier, 1996	Absent	Nektic
Heliodus	Sallan & Coates, 2010	Chordata	Osteichthyes	Sarcopterygii	DIPTERIFORMES		D	Fras-u	D	Fras-u	Demersal	Nektobenthos	Durophagus, Stout, Blunt Snout, Elongate Pectoral Fins, Extant Taxa	0.75	Moy-Thomas & Miles, 1971; Aleyev, 1977; Janvier, 1996	Absent	Nektic
Holodipterus	Sepkoski, 2002	Chordata	Osteichthyes	Sarcopterygii	DIPTERIFORMES		D	Fras	D	Fras	Demersal	Nektobenthos	Durophagus, Stout, Blunt Snout, Elongate Pectoral Fins, Extant Taxa	0.75	Moy-Thomas & Miles, 1971; Aleyev, 1977; Janvier, 1996	Present	Nektic
Howidipterus	Sallan & Coates, 2010	Chordata	Osteichthyes	Sarcopterygii	DIPTERIFORMES		D	Give	D	Give	Demersal	Nektobenthos	Durophagus, Stout, Blunt Snout, Elongate Pectoral Fins, Extant Taxa	0.75	Moy-Thomas & Miles, 1971; Aleyev, 1977; Janvier, 1996	Absent	Nektic
Iowadipterus	Sallan & Coates, 2010	Chordata	Osteichthyes	Sarcopterygii	DIPTERIFORMES		D	Give-u	D	Give-u	Demersal	Nektobenthos	Durophagus, Stout, Blunt Snout, Elongate Pectoral Fins, Extant Taxa	0.75	Moy-Thomas & Miles, 1971; Aleyev, 1977; Janvier, 1996	Absent	Nektic
Iranorhynchus	Sallan & Coates, 2010	Chordata	Osteichthyes	Sarcopterygii	DIPTERIFORMES		D	Fras-l	D	Fras-l	Demersal	Nektobenthos	Durophagus, Stout, Blunt Snout, Elongate Pectoral Fins, Extant Taxa	0.75	Moy-Thomas & Miles, 1971; Aleyev, 1977; Janvier, 1996	Absent	Nektic
Jarvikia	Sallan & Coates, 2010	Chordata	Osteichthyes	Sarcopterygii	DIPTERIFORMES		D	Fame-m	D	Fame-u	Demersal	Nektobenthos	Durophagus, Stout, Blunt Snout, Elongate Pectoral Fins, Extant Taxa	0.75	Moy-Thomas & Miles, 1971; Aleyev, 1977; Janvier, 1996	Absent	Nektic
Oervigia	Sallan & Coates, 2010	Chordata	Osteichthyes	Sarcopterygii	DIPTERIFORMES		D	Fame-u	D	Fame-u	Demersal	Nektobenthos	Durophagus, Stout, Blunt Snout, Elongate Pectoral Fins, Extant Taxa	0.75	Moy-Thomas & Miles, 1971; Aleyev, 1977; Janvier, 1996	Absent	Nektic
Orlowichthys	Sallan & Coates, 2010	Chordata	Osteichthyes	Sarcopterygii	DIPTERIFORMES		D	Fame	D	Fame	Demersal	Nektobenthos	Durophagus, Stout, Blunt Snout, Elongate Pectoral Fins, Extant Taxa	0.75	Moy-Thomas & Miles, 1971; Aleyev, 1977; Janvier, 1996	Absent	Nektic
Pentlandia	Sallan & Coates, 2010	Chordata	Osteichthyes	Sarcopterygii	DIPTERIFORMES		D	Give-u	D	Give-u	Demersal	Nektobenthos	Durophagus, Stout, Blunt Snout, Elongate Pectoral Fins, Extant Taxa	0.75	Moy-Thomas & Miles, 1971; Aleyev, 1977; Janvier, 1996	Absent	Nektic
Phaneropleuron	Sallan & Coates, 2010	Chordata	Osteichthyes	Sarcopterygii	DIPTERIFORMES		D	Fras-l	D	Fame-l	Demersal	Nektobenthos	Durophagus, Stout, Blunt Snout, Elongate Pectoral Fins, Extant Taxa	0.75	Moy-Thomas & Miles, 1971; Aleyev, 1977; Janvier, 1996	Absent	Nektic
Pillararhynchus	Sepkoski, 2002	Chordata	Osteichthyes	Sarcopterygii	DIPTERIFORMES		D	Fras-l	D	Fras-l	Demersal	Nektobenthos	Durophagus, Stout, Blunt Snout, Elongate Pectoral Fins, Extant Taxa	0.75	Moy-Thomas & Miles, 1971; Aleyev, 1977; Janvier, 1996	Present	Nektic
Proceratodus	Sallan & Coates, 2010	Chordata	Osteichthyes	Sarcopterygii	DIPTERIFORMES		D	Fame-u	D	Fame-u	Demersal	Nektobenthos	Durophagus, Stout, Blunt Snout, Elongate Pectoral Fins, Extant Taxa	0.75	Moy-Thomas & Miles, 1971; Aleyev, 1977; Janvier, 1996	Absent	Nektic
Rhinodipterus	Sepkoski, 2002	Chordata	Osteichthyes	Sarcopterygii	DIPTERIFORMES		D	m	D	u	Demersal	Nektobenthos	Durophagus, Stout, Blunt Snout, Elongate Pectoral Fins, Extant Taxa	0.75	Moy-Thomas & Miles, 1971; Aleyev, 1977; Janvier, 1996	Present	Nektic
Rhynchodipterus	Sallan & Coates, 2010	Chordata	Osteichthyes	Sarcopterygii	DIPTERIFORMES		D	Fras-l	D	Fras-l	Demersal	Nektobenthos	Durophagus, Stout, Blunt Snout, Elongate Pectoral Fins, Extant Taxa	0.75	Moy-Thomas & Miles, 1971; Aleyev, 1977; Janvier, 1996	Absent	Nektic
Sagenodus	Sallan & Coates, 2010	Chordata	Osteichthyes	Sarcopterygii	DIPTERIFORMES		C	Vise-u	C	Serp	Demersal	Nektobenthos	Durophagus, Stout, Blunt Snout, Elongate Pectoral Fins, Extant Taxa	0.75	Moy-Thomas & Miles, 1971; Aleyev, 1977; Janvier, 1996	Absent	Nektic
Scaumenacia	Sallan & Coates, 2010	Chordata	Osteichthyes	Sarcopterygii	DIPTERIFORMES		D	Fras-l	D	Fras-l	Demersal	Nektobenthos	Durophagus, Stout, Blunt Snout, Elongate Pectoral Fins, Extant Taxa	0.75	Moy-Thomas & Miles, 1971; Aleyev, 1977; Janvier, 1996	Absent	Nektic
Soederberghia	Sallan & Coates, 2010	Chordata	Osteichthyes	Sarcopterygii	DIPTERIFORMES		D	Fame-u	D	Fame-u	Demersal	Nektobenthos	Durophagus, Stout, Blunt Snout, Elongate Pectoral Fins, Extant Taxa	0.75	Moy-Thomas & Miles, 1971; Aleyev, 1977; Janvier, 1996	Absent	Nektic
Spodichthys	Sallan & Coates, 2010	Chordata	Osteichthyes	Sarcopterygii	DIPTERIFORMES		D	Fras-l	D	Fras-m	Demersal	Nektobenthos	Durophagus, Stout, Blunt Snout, Elongate Pectoral Fins, Extant Taxa	0.75	Moy-Thomas & Miles, 1971; Aleyev, 1977; Janvier, 1996	Absent	Nektic
Sponysedrion	Sepkoski, 2002	Chordata	Osteichthyes	Sarcopterygii	DIPTERIFORMES		D	Emsi-l	D	Emsi-l	Demersal	Nektobenthos	Durophagus, Stout, Blunt Snout, Elongate Pectoral Fins, Extant Taxa	0.75	Moy-Thomas & Miles, 1971; Aleyev, 1977; Janvier, 1996	Present	Nektic
Straitonia	Sallan & Coates, 2010	Chordata	Osteichthyes	Sarcopterygii	DIPTERIFORMES		D	Give-u	D	Give-u	Demersal	Nektobenthos	Durophagus, Stout, Blunt Snout, Elongate Pectoral Fins, Extant Taxa	0.75	Moy-Thomas & Miles, 1971; Aleyev, 1977; Janvier, 1996	Absent	Nektic
Uranolophus	Sepkoski, 2002	Chordata	Osteichthyes	Sarcopterygii	DIPTERIFORMES		D	Sieg	D	Sieg	Demersal	Nektobenthos	Durophagus, Stout, Blunt Snout, Elongate Pectoral Fins, Extant Taxa	0.75	Moy-Thomas & Miles, 1971; Aleyev, 1977; Janvier, 1996	Present	Nektic
Uronemus	Sallan & Coates, 2010	Chordata	Osteichthyes	Sarcopterygii	DIPTERIFORMES		C	Vise	C	Serp	Demersal	Nektobenthos	Durophagus, Stout, Blunt Snout, Elongate Pectoral Fins, Extant Taxa	0.75	Moy-Thomas & Miles, 1971; Aleyev, 1977; Janvier, 1996	Absent	Nektic
Acanthostega	Sallan & Coates, 2010	Chordata	Osteichthyes	Sarcopterygii	EOTETRAPODIFORMES	Tetrapoda	D	Fame-u	D	Fame-u	Demersal	Nektobenthos	Depressed, Muscular Limbs, Dorsal Orbits, Extant Taxa	0.5	Janvier, 1996	Absent	Nektic
Acheroniscus	Sallan & Coates, 2010	Chordata	Osteichthyes	Sarcopterygii	EOTETRAPODIFORMES	Tetrapoda	C	Serp	C	Serp	Demersal	Nektobenthos	Depressed, Muscular Limbs, Dorsal Orbits, Extant Taxa	0.5	Janvier, 1996	Absent	Nektic
Adelogyrinus	Sallan & Coates, 2010	Chordata	Osteichthyes	Sarcopterygii	EOTETRAPODIFORMES	Tetrapoda	C	Serp	C	Serp	Demersal	Nektobenthos	Depressed, Muscular Limbs, Dorsal Orbits, Extant Taxa	0.5	Janvier, 1996	Absent	Nektic
Balanerpeton	Sallan & Coates, 2010	Chordata	Osteichthyes	Sarcopterygii	EOTETRAPODIFORMES	Tetrapoda	C	Vise-u	C	Vise-u	Demersal	Nektobenthos	Depressed, Muscular Limbs, Dorsal Orbits, Extant Taxa	0.5	Janvier, 1996	Absent	Nektic
Caerorhachis	Sallan & Coates, 2010	Chordata	Osteichthyes	Sarcopterygii	EOTETRAPODIFORMES	Tetrapoda	C	Serp	C	Serp	Demersal	Nektobenthos	Depressed, Muscular Limbs, Dorsal Orbits, Extant Taxa	0.5	Janvier, 1996	Absent	Nektic
Casineria	Sallan & Coates, 2010	Chordata	Osteichthyes	Sarcopterygii	EOTETRAPODIFORMES	Tetrapoda	C	Vise-u	C	Vise-u	Demersal	Nektobenthos	Depressed, Muscular Limbs, Dorsal Orbits, Extant Taxa	0.5	Janvier, 1996	Absent	Nektic
Crassigyrinus	Sallan & Coates, 2010	Chordata	Osteichthyes	Sarcopterygii	EOTETRAPODIFORMES	Tetrapoda	C	Vise-u	C	Serp-u	Demersal	Nektobenthos	Depressed, Muscular Limbs, Dorsal Orbits, Extant Taxa	0.5	Janvier, 1996	Absent	Nektic
Densignathus	Sallan & Coates, 2010	Chordata	Osteichthyes	Sarcopterygii	EOTETRAPODIFORMES	Tetrapoda	D	Fame-u	D	Fame-u	Demersal	Nektobenthos	Depressed, Muscular Limbs, Dorsal Orbits, Extant Taxa	0.5	Janvier, 1996	Absent	Nektic
Dolichopareias	Sallan & Coates, 2010	Chordata	Osteichthyes	Sarcopterygii	EOTETRAPODIFORMES	Tetrapoda	C	Vise	C	Vise	Demersal	Nektobenthos	Depressed, Muscular Limbs, Dorsal Orbits, Extant Taxa	0.5	Janvier, 1996	Absent	Nektic
Doracanthus	Sallan & Coates, 2010	Chordata	Osteichthyes	Sarcopterygii	EOTETRAPODIFORMES	Tetrapoda	C	Serp	C	Serp	Demersal	Nektobenthos	Depressed, Muscular Limbs, Dorsal Orbits, Extant Taxa	0.5	Janvier, 1996	Absent	Nektic
Doragnathus	Sallan & Coates, 2010	Chordata	Osteichthyes	Sarcopterygii	EOTETRAPODIFORMES	Tetrapoda	C	Vise-u	C	Serp-u	Demersal	Nektobenthos	Depressed, Muscular Limbs, Dorsal Orbits, Extant Taxa	0.5	Janvier, 1996	Absent	Nektic
Eldeceeon	Sallan & Coates, 2010	Chordata	Osteichthyes	Sarcopterygii	EOTETRAPODIFORMES	Tetrapoda	C	Vise-u	C	Vise-u	Demersal	Nektobenthos	Depressed, Muscular Limbs, Dorsal Orbits, Extant Taxa	0.5	Janvier, 1996	Absent	Nektic
Elginerpeton	Sallan & Coates, 2010	Chordata	Osteichthyes	Sarcopterygii	EOTETRAPODIFORMES	Tetrapoda	D	Fras-u	D	Fras-u	Demersal	Nektobenthos	Depressed, Muscular Limbs, Dorsal Orbits, Extant Taxa	0.5	Janvier, 1996	Absent	Nektic
Elpistostege	Sallan & Coates, 2010	Chordata	Osteichthyes	Sarcopterygii	EOTETRAPODIFORMES	Tetrapoda	D	Fras-l	D	Fras-l	Demersal	Nektobenthos	Depressed, Muscular Limbs, Dorsal Orbits, Extant Taxa	0.5	Janvier, 1996	Absent	Nektic
Eoherpeton	Sallan & Coates, 2010	Chordata	Osteichthyes	Sarcopterygii	EOTETRAPODIFORMES	Tetrapoda	C	Vise-u	C	Serp-u	Demersal	Nektobenthos	Depressed, Muscular Limbs, Dorsal Orbits, Extant Taxa	0.5	Janvier, 1996	Absent	Nektic
Eucritta	Sallan & Coates, 2010	Chordata	Osteichthyes	Sarcopterygii	EOTETRAPODIFORMES	Tetrapoda	C	Vise-u	C	Vise-u	Demersal	Nektobenthos	Depressed, Muscular Limbs, Dorsal Orbits, Extant Taxa	0.5	Janvier, 1996	Absent	Nektic
Hynerpeton	Sallan & Coates, 2010	Chordata	Osteichthyes	Sarcopterygii	EOTETRAPODIFORMES	Tetrapoda	D	Fame-u	D	Fame-u	Demersal	Nektobenthos	Depressed, Muscular Limbs, Dorsal Orbits, Extant Taxa	0.5	Janvier, 1996	Absent	Nektic
Ichthyostega	Sallan & Coates, 2010	Chordata	Osteichthyes	Sarcopterygii	EOTETRAPODIFORMES	Tetrapoda	D	Fame-u	D	Fame-u	Demersal	Nektobenthos	Depressed, Muscular Limbs, Dorsal Orbits, Extant Taxa	0.5	Janvier, 1996	Absent	Nektic
Jakubsonia	Sallan & Coates, 2010	Chordata	Osteichthyes	Sarcopterygii	EOTETRAPODIFORMES	Tetrapoda	D	Fame-m	D	Fame-m	Demersal	Nektobenthos	Depressed, Muscular Limbs, Dorsal Orbits, Extant Taxa	0.5	Janvier, 1996	Absent	Nektic
Lethiscus	Sallan & Coates, 2010	Chordata	Osteichthyes	Sarcopterygii	EOTETRAPODIFORMES	Tetrapoda	C	Vise-u	C	Vise-u	Demersal	Nektobenthos	Depressed, Muscular Limbs, Dorsal Orbits, Extant Taxa	0.5	Janvier, 1996	Absent	Nektic
Livoniana	Sallan & Coates, 2010	Chordata	Osteichthyes	Sarcopterygii	EOTETRAPODIFORMES	Tetrapoda	D	Give-u	D	Give-u	Demersal	Nektobenthos	Depressed, Muscular Limbs, Dorsal Orbits, Extant Taxa	0.5	Janvier, 1996	Absent	Nektic
Loxomma	Sallan & Coates, 2010	Chordata	Osteichthyes	Sarcopterygii	EOTETRAPODIFORMES	Tetrapoda	C	Vise-u	C	Serp	Demersal	Nektobenthos	Depressed, Muscular Limbs, Dorsal Orbits, Extant Taxa	0.5	Janvier, 1996	Absent	Nektic
Obruchevichthys	Sallan & Coates, 2010	Chordata	Osteichthyes	Sarcopterygii	EOTETRAPODIFORMES	Tetrapoda	D	Fame-l	D	Fame-l	Demersal	Nektobenthos	Depressed, Muscular Limbs, Dorsal Orbits, Extant Taxa	0.5	Janvier, 1996	Absent	Nektic
Ophiderpeton	Sallan & Coates, 2010	Chordata	Osteichthyes	Sarcopterygii	EOTETRAPODIFORMES	Tetrapoda	C	Vise-u	C	Vise-u	Demersal	Nektobenthos	Depressed, Muscular Limbs, Dorsal Orbits, Extant Taxa	0.5	Janvier, 1996	Absent	Nektic
Ossinodus	Sallan & Coates, 2010	Chordata	Osteichthyes	Sarcopterygii	EOTETRAPODIFORMES	Tetrapoda	C	Vise	C	Vise	Demersal	Nektobenthos	Depressed, Muscular Limbs, Dorsal Orbits, Extant Taxa	0.5	Janvier, 1996	Absent	Nektic
Palaeomolgophis	Sallan & Coates, 2010	Chordata	Osteichthyes	Sarcopterygii	EOTETRAPODIFORMES	Tetrapoda	C	Vise-u	C	Vise-u	Demersal	Nektobenthos	Depressed, Muscular Limbs, Dorsal Orbits, Extant Taxa	0.5	Janvier, 1996	Absent	Nektic
Panderichthys	Sallan & Coates, 2010	Chordata	Osteichthyes	Sarcopterygii	EOTETRAPODIFORMES	Tetrapoda	D	Give-u	D	Fras	Demersal	Nektobenthos	Depressed, Muscular Limbs, Dorsal Orbits, Extant Taxa	0.5	Janvier, 1996	Absent	Nektic
Papposaurus	Sallan & Coates, 2010	Chordata	Osteichthyes	Sarcopterygii	EOTETRAPODIFORMES	Tetrapoda	C	Serp	C	Serp	Demersal	Nektobenthos	Depressed, Muscular Limbs, Dorsal Orbits, Extant Taxa	0.5	Janvier, 1996	Absent	Nektic
Parapanderichthys	Sallan & Coates, 2010	Chordata	Osteichthyes	Sarcopterygii	EOTETRAPODIFORMES	Tetrapoda	D	Fras-u	D	Fras-u	Demersal	Nektobenthos	Depressed, Muscular Limbs, Dorsal Orbits, Extant Taxa	0.5	Janvier, 1996	Absent	Nektic
Pholidogaster	Sallan & Coates, 2010	Chordata	Osteichthyes	Sarcopterygii	EOTETRAPODIFORMES	Tetrapoda	C	Vise	C	Vise-u	Demersal	Nektobenthos	Depressed, Muscular Limbs, Dorsal Orbits, Extant Taxa	0.5	Janvier, 1996	Absent	Nektic
Proterogyrinus	Sallan & Coates, 2010	Chordata	Osteichthyes	Sarcopterygii	EOTETRAPODIFORMES	Tetrapoda	C	Serp-u	C	Serp-u	Demersal	Nektobenthos	Depressed, Muscular Limbs, Dorsal Orbits, Extant Taxa	0.5	Janvier, 1996	Absent	Nektic
Silvanerpeton	Sallan & Coates, 2010	Chordata	Osteichthyes	Sarcopterygii	EOTETRAPODIFORMES	Tetrapoda	C	Vise-u	C	Vise-u	Demersal	Nektobenthos	Depressed, Muscular Limbs, Dorsal Orbits, Extant Taxa	0.5	Janvier, 1996	Absent	Nektic
Spathicephalus	Sallan & Coates, 2010	Chordata	Osteichthyes	Sarcopterygii	EOTETRAPODIFORMES	Tetrapoda	C	Serp	C	Serp-u	Demersal	Nektobenthos	Depressed, Muscular Limbs, Dorsal Orbits, Extant Taxa	0.5	Janvier, 1996	Absent	Nektic
Tulerpeton	Sallan & Coates, 2010	Chordata	Osteichthyes	Sarcopterygii	EOTETRAPODIFORMES	Tetrapoda	D	Fame-u	D	Fame-u	Demersal	Nektobenthos	Depressed, Muscular Limbs, Dorsal Orbits, Extant Taxa	0.5	Janvier, 1996	Absent	Nektic
Ventastega	Sallan & Coates, 2010	Chordata	Osteichthyes	Sarcopterygii	EOTETRAPODIFORMES	Tetrapoda	D	Fame-u	D	Fame-u	Demersal	Nektobenthos	Depressed, Muscular Limbs, Dorsal Orbits, Extant Taxa	0.5	Janvier, 1996	Absent	Nektic
Westlothiana	Sallan & Coates, 2010	Chordata	Osteichthyes	Sarcopterygii	EOTETRAPODIFORMES	Tetrapoda	C	Vise-u	C	Vise-u	Demersal	Nektobenthos	Depressed, Muscular Limbs, Dorsal Orbits, Extant Taxa	0.5	Janvier, 1996	Absent	Nektic
Cabonnichthys	Sallan & Coates, 2010	Chordata	Osteichthyes	Sarcopterygii	EOTETRAPODIFORMES	Tristichopteridae	D	Fame-l	D	Fame-l	Demersal	Nektobenthos	Depressed, Muscular Limbs, Dorsal Orbits, Extant Taxa	0.5	Janvier, 1996	Absent	Nektic
Eusthenodon	Sallan & Coates, 2010	Chordata	Osteichthyes	Sarcopterygii	EOTETRAPODIFORMES	Tristichopteridae	D	Fame-u	D	Fame-u	Demersal	Nektobenthos	Depressed, Muscular Limbs, Dorsal Orbits, Extant Taxa	0.5	Janvier, 1996	Absent	Nektic
Gogonasus	Sallan & Coates, 2010	Chordata	Osteichthyes	Sarcopterygii	EOTETRAPODIFORMES	Tristichopteridae	D	Fras-l	D	Fras-l	Demersal	Nektobenthos	Depressed, Muscular Limbs, Dorsal Orbits, Extant Taxa	0.5	Janvier, 1996	Absent	Nektic
Heddleichthys	Sallan & Coates, 2010	Chordata	Osteichthyes	Sarcopterygii	EOTETRAPODIFORMES	Tristichopteridae	D	Fame-l	D	Fame-l	Demersal	Nektobenthos	Depressed, Muscular Limbs, Dorsal Orbits, Extant Taxa	0.5	Janvier, 1996	Absent	Nektic
Hyneria	Sallan & Coates, 2010	Chordata	Osteichthyes	Sarcopterygii	EOTETRAPODIFORMES	Tristichopteridae	D	Fame-u	D	Fame-u	Demersal	Nektobenthos	Depressed, Muscular Limbs, Dorsal Orbits, Extant Taxa	0.5	Janvier, 1996	Absent	Nektic
Jarvikina	Sallan & Coates, 2010	Chordata	Osteichthyes	Sarcopterygii	EOTETRAPODIFORMES	Tristichopteridae	D	Fras-u	D	Fras-u	Demersal	Nektobenthos	Depressed, Muscular Limbs, Dorsal Orbits, Extant Taxa	0.5	Janvier, 1996	Absent	Nektic
Langliera	Sallan & Coates, 2010	Chordata	Osteichthyes	Sarcopterygii	EOTETRAPODIFORMES	Tristichopteridae	D	Fame-u	D	Fame-u	Demersal	Nektobenthos	Depressed, Muscular Limbs, Dorsal Orbits, Extant Taxa	0.5	Janvier, 1996	Absent	Nektic
Mandageria	Sallan & Coates, 2010	Chordata	Osteichthyes	Sarcopterygii	EOTETRAPODIFORMES	Tristichopteridae	D	Fame-l	D	Fame-l	Demersal	Nektobenthos	Depressed, Muscular Limbs, Dorsal Orbits, Extant Taxa	0.5	Janvier, 1996	Absent	Nektic
Platycephalichthys	Sallan & Coates, 2010	Chordata	Osteichthyes	Sarcopterygii	EOTETRAPODIFORMES	Tristichopteridae	D	Fras-u	D	Fame-u	Demersal	Nektobenthos	Depressed, Muscular Limbs, Dorsal Orbits, Extant Taxa	0.5	Janvier, 1996	Absent	Nektic
Tristichopterus	Sallan & Coates, 2010	Chordata	Osteichthyes	Sarcopterygii	EOTETRAPODIFORMES	Tristichopteridae	D	Give-l	D	Give-u	Demersal	Nektobenthos	Depressed, Muscular Limbs, Dorsal Orbits, Extant Taxa	0.5	Janvier, 1996	Absent	Nektic
Ventalepis	Sallan & Coates, 2010	Chordata	Osteichthyes	Sarcopterygii	EOTETRAPODIFORMES	Tristichopteridae	D	Fame-u	D	Fame-u	Demersal	Nektobenthos	Depressed, Muscular Limbs, Dorsal Orbits, Extant Taxa	0.5	Janvier, 1996	Absent	Nektic
Yambira	Sallan & Coates, 2010	Chordata	Osteichthyes	Sarcopterygii	EOTETRAPODIFORMES	Tristichopteridae	D	Fame-u	D	Fame-u	Demersal	Nektobenthos	Depressed, Muscular Limbs, Dorsal Orbits, Extant Taxa	0.5	Janvier, 1996	Absent	Nektic
Hamodus	Sallan & Coates, 2010	Chordata	Osteichthyes	Sarcopterygii	ONYCHODONTIDA		D	Give-l	D	Give-u	Nektic	Eunekton	Fusiform, Stem Actinistian	0.75	Lu et al., 2016	Absent	Nektic
Pycnacanthus	Sallan & Coates, 2010	Chordata	Osteichthyes	Sarcopterygii	ONYCHODONTIDA		D	Fame-m	D	Fame-m	Nektic	Eunekton	Fusiform, Stem Actinistian	0.75	Lu et al., 2016	Absent	Nektic
Greiserolepis	Sallan & Coates, 2010	Chordata	Osteichthyes	Sarcopterygii	OSTEOLEPIFORMES	Megalichthyidae	C	Tour	C	Tour	Demersal	Nektobenthos	Depressed Wide Skull, Large Fan-Shaped Pectoral Fins	0.75	Witzmann & Schoch, 2012	Absent	Nektic
Mahalalepis	Sallan & Coates, 2010	Chordata	Osteichthyes	Sarcopterygii	OSTEOLEPIFORMES	Megalichthyidae	D	Give	D	Give	Demersal	Nektobenthos	Depressed Wide Skull, Large Fan-Shaped Pectoral Fins	0.75	Witzmann & Schoch, 2012	Absent	Nektic
Megalichthys	Sallan & Coates, 2010	Chordata	Osteichthyes	Sarcopterygii	OSTEOLEPIFORMES	Megalichthyidae	D	Fame-u	C	Serp-u	Demersal	Nektobenthos	Depressed Wide Skull, Large Fan-Shaped Pectoral Fins	0.75	Witzmann & Schoch, 2012	Absent	Nektic
Megistolepis	Sallan & Coates, 2010	Chordata	Osteichthyes	Sarcopterygii	OSTEOLEPIFORMES	Megalichthyidae	D	Fame-u	D	Fame-u	Demersal	Nektobenthos	Depressed Wide Skull, Large Fan-Shaped Pectoral Fins	0.75	Witzmann & Schoch, 2012	Absent	Nektic
Rhizodopsis	Sallan & Coates, 2010	Chordata	Osteichthyes	Sarcopterygii	OSTEOLEPIFORMES	Megalichthyidae	C	Tour	C	Serp	Demersal	Nektobenthos	Depressed Wide Skull, Large Fan-Shaped Pectoral Fins	0.75	Witzmann & Schoch, 2012	Absent	Nektic
Canowindra	Sallan & Coates, 2010	Chordata	Osteichthyes	Sarcopterygii	OSTEOLEPIFORMES	Osteolepididae	D	Fame-l	D	Fame-l	Demersal	Nektobenthos	Depressed Wide Skull, Large Fan-Shaped Pectoral Fins	0.75	Witzmann & Schoch, 2012	Absent	Nektic
Koharalepis	Sallan & Coates, 2010	Chordata	Osteichthyes	Sarcopterygii	OSTEOLEPIFORMES	Osteolepididae	D	Give	D	Give	Demersal	Nektobenthos	Depressed Wide Skull, Large Fan-Shaped Pectoral Fins	0.75	Witzmann & Schoch, 2012	Absent	Nektic
Litoptychius	Sallan & Coates, 2010	Chordata	Osteichthyes	Sarcopterygii	OSTEOLEPIFORMES	Osteolepididae	D	Fame-u	D	Fame-u	Demersal	Nektobenthos	Depressed Wide Skull, Large Fan-Shaped Pectoral Fins	0.75	Witzmann & Schoch, 2012	Absent	Nektic
Megadonichthys	Sallan & Coates, 2010	Chordata	Osteichthyes	Sarcopterygii	OSTEOLEPIFORMES	Osteolepididae	D	Give-u	D	Give-u	Demersal	Nektobenthos	Depressed Wide Skull, Large Fan-Shaped Pectoral Fins	0.75	Witzmann & Schoch, 2012	Absent	Nektic
Platyethmoidea	Sallan & Coates, 2010	Chordata	Osteichthyes	Sarcopterygii	OSTEOLEPIFORMES	Osteolepididae	D	Give	D	Give	Demersal	Nektobenthos	Depressed Wide Skull, Large Fan-Shaped Pectoral Fins	0.75	Witzmann & Schoch, 2012	Absent	Nektic
Thaumatolepis	Sallan & Coates, 2010	Chordata	Osteichthyes	Sarcopterygii	OSTEOLEPIFORMES	Osteolepididae	D	Fame-m	D	Fame-m	Demersal	Nektobenthos	Depressed Wide Skull, Large Fan-Shaped Pectoral Fins	0.75	Witzmann & Schoch, 2012	Absent	Nektic
Heimenia	Sallan & Coates, 2010	Chordata	Osteichthyes	Sarcopterygii	POROLEPIFORMES		D	Give	D	Give	Demersal	Eudemersus	Muscular Lobe Fins, Broad Head, Somewhat Depressed	0.75	Downs et al., 2011	Absent	Nektic
Laccognathus	Sallan & Coates, 2010	Chordata	Osteichthyes	Sarcopterygii	POROLEPIFORMES		D	Give-u	D	Give-u	Demersal	Eudemersus	Muscular Lobe Fins, Broad Head, Somewhat Depressed	0.75	Downs et al., 2011	Absent	Nektic
Quebecia	Sallan & Coates, 2010	Chordata	Osteichthyes	Sarcopterygii	POROLEPIFORMES		D	Fras-l	D	Fras-l	Demersal	Eudemersus	Muscular Lobe Fins, Broad Head, Somewhat Depressed	0.75	Downs et al., 2011	Absent	Nektic
Archichthys	Sallan & Coates, 2010	Chordata	Osteichthyes	Sarcopterygii	RHIZODONTIDA		C	Vise	C	Serp	Demersal	Nektobenthos	Muscular Lobe Fins, Depressed, Broad Head, Dorsal Orbits	0.75	Johanson & Ahlberg, 1998	Absent	Nektic
Archichthys (Strepsodus)	Sallan & Coates, 2010	Chordata	Osteichthyes	Sarcopterygii	RHIZODONTIDA		C	Vise-u	C	Vise-u	Demersal	Nektobenthos	Muscular Lobe Fins, Depressed, Broad Head, Dorsal Orbits	0.75	Johanson & Ahlberg, 1998	Absent	Nektic
Aztecia	Sallan & Coates, 2010	Chordata	Osteichthyes	Sarcopterygii	RHIZODONTIDA		D	Give	D	Give	Demersal	Nektobenthos	Muscular Lobe Fins, Depressed, Broad Head, Dorsal Orbits	0.75	Johanson & Ahlberg, 1998	Absent	Nektic
Barameda	Sallan & Coates, 2010	Chordata	Osteichthyes	Sarcopterygii	RHIZODONTIDA		C	Tour	C	Tour	Demersal	Nektobenthos	Muscular Lobe Fins, Somewhat Depressed, Somewhat Dorsal Orbits	0.75	Johanson & Ahlberg, 1998	Absent	Nektic
Gooloogongia	Sallan & Coates, 2010	Chordata	Osteichthyes	Sarcopterygii	RHIZODONTIDA		D	Fame-l	D	Fame-l	Demersal	Nektobenthos	Muscular Lobe Fins, Depressed, Broad Head, Dorsal Orbits	0.75	Johanson & Ahlberg, 1998	Absent	Nektic
Letognathus	Sallan & Coates, 2010	Chordata	Osteichthyes	Sarcopterygii	RHIZODONTIDA		C	Tour	C	Tour	Demersal	Nektobenthos	Muscular Lobe Fins, Depressed, Broad Head, Dorsal Orbits	0.75	Johanson & Ahlberg, 1998	Absent	Nektic
Notorhizodon	Sallan & Coates, 2010	Chordata	Osteichthyes	Sarcopterygii	RHIZODONTIDA		D	Give	D	Give	Demersal	Nektobenthos	Muscular Lobe Fins, Depressed, Broad Head, Dorsal Orbits	0.75	Johanson & Ahlberg, 1998	Absent	Nektic
Polyplocodus	Sallan & Coates, 2010	Chordata	Osteichthyes	Sarcopterygii	RHIZODONTIDA		D	Fras-l	D	Fras-l	Demersal	Nektobenthos	Muscular Lobe Fins, Depressed, Broad Head, Dorsal Orbits	0.75	Johanson & Ahlberg, 1998	Absent	Nektic
Pycnotenion	Sallan & Coates, 2010	Chordata	Osteichthyes	Sarcopterygii	RHIZODONTIDA		C	Tour-u	C	Tour-u	Demersal	Nektobenthos	Muscular Lobe Fins, Depressed, Broad Head, Dorsal Orbits	0.75	Johanson & Ahlberg, 1998	Absent	Nektic
Pyncnotenion	Sallan & Coates, 2010	Chordata	Osteichthyes	Sarcopterygii	RHIZODONTIDA		C	Tour	C	Tour	Demersal	Nektobenthos	Muscular Lobe Fins, Depressed, Broad Head, Dorsal Orbits	0.75	Johanson & Ahlberg, 1998	Absent	Nektic
Sauripterus	Sallan & Coates, 2010	Chordata	Osteichthyes	Sarcopterygii	RHIZODONTIDA		D	Fame-m	D	Fame-u	Demersal	Nektobenthos	Muscular Lobe Fins, Depressed, Broad Head, Dorsal Orbits	0.75	Johanson & Ahlberg, 1998	Absent	Nektic
Screbinodus	Sallan & Coates, 2010	Chordata	Osteichthyes	Sarcopterygii	RHIZODONTIDA		C	Vise	C	Serp	Demersal	Nektobenthos	Muscular Lobe Fins, Depressed, Broad Head, Dorsal Orbits	0.75	Johanson & Ahlberg, 1998	Absent	Nektic
Strepsodus	Sallan & Coates, 2010	Chordata	Osteichthyes	Sarcopterygii	RHIZODONTIDA		D	Fame-u	C	Serp-u	Demersal	Nektobenthos	Muscular Lobe Fins, Depressed, Broad Head, Dorsal Orbits	0.75	Johanson & Ahlberg, 1998	Absent	Nektic
Strepstodus	Sallan & Coates, 2010	Chordata	Osteichthyes	Sarcopterygii	RHIZODONTIDA		C	Vise-u	C	Serp	Demersal	Nektobenthos	Muscular Lobe Fins, Depressed, Broad Head, Dorsal Orbits	0.75	Johanson & Ahlberg, 1998	Absent	Nektic
Kenichthys	Lu et al., 2012	Chordata	Osteichthyes	Sarcopterygii			D	Emsi	D	Emsi	Demersal	Eudemersus	Somewhat Broad & Somewhat Depressed Head, Muscular Lobe Fins	0.5	Swartz, 2012	Absent	Nektic
Tungsenia	Lu et al., 2012	Chordata	Osteichthyes	Sarcopterygii			D	Sieg	D	Sieg	Demersal	Eudemersus	Somewhat Broad & Somewhat Depressed Head, Muscular Lobe Fins	0.5	Swartz, 2012	Absent	Nektic
Breizosteus	Sepkoski, 2002	Chordata	Placodermi		ACANTHOTHORACI		D	Sieg	D	Sieg	Demersal	Eudemersus	Dorsal Orbits and Nostrils	0.75	Denison, 1978	Present	Nektic
Dobrowlania	Sepkoski, 2002	Chordata	Placodermi		ACANTHOTHORACI		D	Gedi-u	D	Gedi-u	Demersal	Eudemersus	Dorsal Orbits and Nostrils	0.75	Denison, 1978	Present	Nektic
Kimaspis	Sepkoski, 2002	Chordata	Placodermi		ACANTHOTHORACI		D	Gedi-l	D	Gedi-l	Demersal	Eudemersus	Dorsal Orbits and Nostrils	0.75	Denison, 1978	Present	Nektic
Kolymaspis	Sepkoski, 2002	Chordata	Placodermi		ACANTHOTHORACI		D	Emsi	D	Emsi	Demersal	Eudemersus	Dorsal Orbits and Nostrils	0.75	Denison, 1978	Present	Nektic
Kosoraspis	Sepkoski, 2002	Chordata	Placodermi		ACANTHOTHORACI		D	Gedi	D	Sieg-l	Demersal	Eudemersus	Dorsal Orbits and Nostrils	0.75	Denison, 1978	Present	Nektic
Murrindalaspis	Sepkoski, 2002	Chordata	Placodermi		ACANTHOTHORACI		D	Emsi	D	Emsi	Demersal	Eudemersus	Dorsal Orbits and Nostrils	0.75	Denison, 1978	Present	Nektic
Palaeacanthaspis	Sepkoski, 2002	Chordata	Placodermi		ACANTHOTHORACI		D	Gedi-u	D	Gedi-u	Demersal	Eudemersus	Dorsal Orbits and Nostrils	0.75	Denison, 1978	Present	Nektic
Radotina	Sepkoski, 2002	Chordata	Placodermi		ACANTHOTHORACI		D	Gedi	D	Sieg	Demersal	Eudemersus	Dorsal Orbits and Nostrils	0.75	Denison, 1978	Present	Nektic
Romundina	Sepkoski, 2002	Chordata	Placodermi		ACANTHOTHORACI		D	Gedi-u	D	Gedi-u	Demersal	Eudemersus	Dorsal Orbits and Nostrils	0.75	Denison, 1978	Present	Nektic
Weejasperaspis	Sepkoski, 2002	Chordata	Placodermi		ACANTHOTHORACI		D	Emsi	D	Emsi	Demersal	Eudemersus	Dorsal Orbits and Nostrils	0.75	Denison, 1978	Present	Nektic
[truncated: 2,435 more rows]
[truncated: 12 more columns]

## Sheet: PBDB
Genus	G*	Species	ref_author	ref_pubyr	Phylum	P*	Class	C*	Order	O*	Family	F*	zone	stratcomments	early_interval	max_ma	late_interval	min_ma	Early Period *	ICS Early Epoch *	ICS Early Age *	Late Period *	ICS Late Epoch *	ICS Late Age *	collection_no	collection_name	collection_subset	collection_aka	Formation	stratgroup	member	primary_reference	authorizer	enterer	modifier	Megaguild	Life Mode	Life Mode Justification	Confidence	Life Mode Reference	Klug et al. (2010) Megaguilds		SQS (Shareholder Quorum Subsampling) SIB (Sampled-in-Bin) PBDB (Paleobiology Database) Generic Diversity
[truncated: 52,757 more rows]
[truncated: 32 more columns]

[truncated: 1 more sheets: Westermann Morphospace]
